# Supplementary material for: Effect of heteroatom and functionality substitution on the oxidation potential of cyclic nitroxide radicals: role of electrostatics in electrochemistry
Source: Royal Society of Chemistry journal article supplement (doi:10.1039/c7cp07444a), 2018-01-01
Supplement: c7cp07444a1.pdf [file c7cp07444a1.pdf]

## *Supporting Information for:*

# Effect of Heteroatom and Functionality Substitution on the Oxidation Potential of Cyclic Nitroxide Radicals: Role of Electrostatics in Electrochemistry

*Kai Zhang,<sup>1</sup> Benjamin B. Noble,<sup>2</sup> Adam C. Mater,<sup>2</sup> Michael J. Monteiro,<sup>1</sup> Michelle L. Coote,<sup>2\*</sup> and  
Zhongfan Jia<sup>1\*</sup>*

1. Australian Institute for Bioengineering and Nanotechnology, University of Queensland,  
Brisbane QLD 4072, Australia
2. ARC Centre of Excellence for Electromaterials Science, Research School of Chemistry,  
Australian National University, Canberra ACT 2601, Australia

To whom all correspondence should be addressed. E-mail: [michelle.coote@anu.edu.au](mailto:michelle.coote@anu.edu.au) (M.L.C.);  
[z.jia@uq.edu.au](mailto:z.jia@uq.edu.au) (Z.J.).

### **Table of Contents**

|                                               |           |
|-----------------------------------------------|-----------|
| <b>Detailed Experimental Procedures .....</b> | <b>2</b>  |
| <b>NMR Spectra .....</b>                      | <b>15</b> |
| <b>Theoretical Methodology .....</b>          | <b>18</b> |
| <b>Supporting computational data. ....</b>    | <b>25</b> |

## Detailed Experimental Procedures

**Materials.** The following reagents and solvents were used as received: silica gel 60 (230-400 mesh) ATM (SDS), TLC plates (silica gel 60 F254), sodium chloride (Univar, 99.9%), sodium iodide (Sigma-Aldrich, ACS reagent,  $\geq 99.5\%$ ), lithium chloride (Sigma-Aldrich, BioXtra,  $\geq 99.0\%$ ), methanol (Univar, AR grade), sodium hydrogen carbonate (Merck, AR grade), hydrochloric acid (Vetec, AR, 35-37%), sulfuric acid (Sigma-Aldrich, ACS reagent, 95.0-98.0%), acetic acid glacial (Merck, 100% anhydrous for analysis), sodium azide (Sigma-Aldrich, ReagentPlus®,  $\geq 99.5\%$ ), sodium hydroxide pellets (Thermo Fisher Scientific, CertiFied AR 500g) n-hexane (Scharlau, 96%), acetonitrile (Lab-Scan, HPLC grade), chloroform (CHCl<sub>3</sub>, Pronalys, 99%), dichloromethane (DCM, Labscan, AR grade), diethyl ether (Et<sub>2</sub>O, Pronalys, AR grade), tetrahydrofuran (THF, HPLC grade, Lichrosolv, 99.8%), ethyl acetate (AR grade), toluene (HPLC, LABSCAN, 99.8%), dimethyl sulfoxide (DMSO, LABSCAN, 99.8%), petroleum spirit (Chem-supply Pty Ltd, 40-60°C AR), triethylamine (TEA, Fluka, purum), magnesium sulfate (Sigma-Aldrich, anhydrous, free-flowing, Redi-Dri™, reagent grade,  $\geq 97\%$ ), potassium hydroxide (Sigma-Aldrich,  $\geq 85\%$  KOH basis, pellets, white hydrogen peroxide) 30% w/w (Univar, AR grade), sodium hydride (Aldrich, 60 wt% in mineral oil), N,N'-dicyclohexylcarbodiimide (DCC, Aldrich, 99%), 4-(dimethylamino)pyridine (DMAP, Aldrich,  $> 99\%$ ), N-(3-dimethylaminopropyl)-N'-ethylcarbodiimide hydrochloride (EDC·HCl, Aldrich, 97%), propargyl bromide (Aldrich, 80 wt % in toluene), 2,2,6,6-tetramethyl-4-piperidone (Aldrich, 95%), 4-vinylbenzyl chloride (Aldrich, 90%), p-toluenesulfonyl chloride (Aldrich,  $\geq 98\%$ ), potassium carbonate (Sigma-Aldrich, anhydrous, ACS reagent,  $\geq 99\%$ ), ethylenediaminetetraacetic acid (Sigma-Aldrich, ACS reagent, 99.4-100.6%, powder), sodium borohydride (Aldrich, purum p.a.,  $\geq 96\%$ ), sodium tungstate dihydrate (Sigma-Aldrich, ACS reagent,  $\geq 99\%$ ), hydroxylamine hydrochloride (Sigma-Aldrich, ACS reagent, 98.0%), tetrabromomethane (Aldrich, ReagentPlus®, 99%), triphenylphosphine (Sigma-Aldrich, ReagentPlus®,  $\geq 98.5\%$ ), bromine (Sigma-Aldrich, reagent grade), 2-amino-2-methyl-1-propanol (Sigma-Aldrich, BioXtra,  $\geq 95\%$ ), 3-chloroperbenzoic acid (Aldrich,  $\leq 77\%$ ), lithium aluminum hydride (Aldrich, green alternative powder, reagent grade,

95%), *p*-toluenesulfonyl chloride (Sigma-Aldrich, reagent grade,  $\geq 98\%$ ), 2,2,6,6-tetramethylpiperidiyl-1-oxyl (TEMPO) and 4-carboxyl-2,2,6,6-tetramethylpiperidiyl-1-oxyl (4-carboxyl-TEMPO) (Aldrich) were used as received.

**Characterization.** *<sup>1</sup>H and <sup>13</sup>C Nuclear Magnetic Resonance (NMR) Spectroscopy.* All NMR spectra were recorded on a Bruker DRX 300 MHz or 400 MHz using an external lock (CDCl<sub>3</sub> or DMSO-d<sub>6</sub>) and referenced to the residual nondeuterated solvent (CHCl<sub>3</sub> or DMSO). *Electron Spray Ionization-mass spectra (ESI-MS).* All the ESI-MS spectra were recorded on Waters LC-MS system with the condition setting as follows: the capillary voltage as 3.0 KV, extractor voltage 2.0 V, RF Lens 0.5 V, source temperature 120 °C, desolvation temperature 200 °C, desolvation gas flow 500 L/hr, pump flow 20  $\mu$ L/min. Sample concentration was 1-5 mg/mL in MeOH, and the cone voltage was varied from 15 to 80V depending on the samples. *Electron Paramagnetic Resonance (EPR).* EPR spectra were recorded with a Bruker E540 spectrometer operating at X-band (~9.8 GHz) and using a Bruker ER4122SQE-W1 high sensitivity resonator. Samples were measure in a 1.5mm internal diameter capillary with the following instrumental parameters, microwave power = 0.635 mW, modulation amplitude = 1 G. The spectra were processed using Bruker Xepr software. *Cyclic Voltammetry (CV).* The electrochemical measurements were performed using a conventional three-electrode cell under standard ambient conditions. A coiled platinum wire and Ag/AgNO<sub>3</sub> were used as the counter and the reference electrodes, respectively. A potentiostat system (CHI-760D) was used for cyclic voltammetry. The cyclic voltammograms were measured using 5 mM solution in MeCN (0.1M tetrabutylammonium hexafluorophosphate). *Attenuated Total Reflectance Fourier Transform Spectroscopy (ATR-FTIR).* ATR-FTIR spectra were obtained using a diamond/ZnSe crystal ATR accessory on a Perkin-Elmer 400 FT-IR/FT-FIR Spectrometer. Spectra were recorded between 4000 and 500 cm<sup>-1</sup> by acquiring 24 scans at 4 cm<sup>-1</sup> resolution with an OPD velocity of 0.2 cm s<sup>-1</sup>. Solids were pressed directly onto the diamond internal reflection element of the ATR without further sample preparation. *Elemental Analysis (EA).* Carbon, nitrogen and oxygen content was measured by

dynamic flash combustion of the sample using a Flash 2000 Thermo Fisher organic elemental analyser.

**Synthesis of functional nitroxide radicals (b) (g), (k) and (l)** was according to previous procedure.<sup>51</sup>,

2

### **Synthesis of functional nitroxide radicals (a and c)**

**4-oxo-TEMPO (a).** Synthesis of (a) was carried out according the reported procedure with modification. Briefly, 2, 2, 6, 6-tetramethylpiperidone (**1**) 6.0 g ( $3.87 \times 10^{-2}$  mol), EDTA 0.13 g ( $4.45 \times 10^{-4}$  mol), and sodium tungstate dihydrate 1.8 g ( $5.46 \times 10^{-3}$  mol) were added to 200 ml methanol/water (1/1, v/v) with stirring and cooling in an ice-water bath. Then 18 mL H<sub>2</sub>O<sub>2</sub> (30 wt %) was added dropwise to the mixture. The mixture was kept stirring at room temperature overnight, after which the colour turned to red. The resulting mixture was then condensed under reduced pressure to remove methanol, and the rest was extracted with diethyl ether (3 x 100 mL). The organic phase was collected, dried over MgSO<sub>4</sub> and filtered. The filtrate was concentrated. The crude product was purified by column chromatography (silica gel) using DCM/MeOH mixture (95/5, v/v) as the eluent. Finally, 5.45 g orange solid nitroxide radical (**a**) was obtained with a yield of 82.2%.  $R_f=0.68$  (DCM/MeOH, 95/5, v/v). ESI-MS: Cald. (C<sub>9</sub>H<sub>16</sub>NO<sub>2</sub>+H<sup>+</sup>) 171.13; Found 171.18. IR  $\nu_{\max}/\text{cm}^{-1}$ :1380, 1650, 2970. Elemental Analysis: Cald. C, 63.5; H, 9.47; N, 8.23; O, 18.80; Found: C, 63.16; H, 9.24; N, 8.44; O, 19.16%.

**1-hydroxy-2, 2, 6, 6-tetramethylpiperidin-4-one oxime (c)** To a 50 mL round bottom flask, nitroxide radical (**a**) 2.0 g ( $1.18 \times 10^{-2}$  mol) was dissolved in 10 mL water with a few drops of methanol to increase the solubility. In another flask, NH<sub>2</sub>OH·HCl 0.69 g ( $1.0 \times 10^{-2}$  mol) was pre-neutralized with NaOH 0.4 g ( $1.0 \times 10^{-2}$  mol) in 10 mL water. Then, neutralised NH<sub>2</sub>OH solution was dropped to the solution of (**a**) in 10 mins. As the reaction proceeds, some orange solid precipitated out. The reaction was stirred at room temperature for 1 h, and checked by TLC to monitor full

conversion of reactant (**a**). The orange solid product **c** (1.63 g) was filtered out from the resulting mixture, washed with deionized water (3 x 20 mL) and dried under high vacuum overnight. Yield: 74.7%  $R_f=0.50$  (DCM/MeOH, 90/10, v/v). ESI-MS: Cald. ( $C_9H_{17}N_2O_2+H^+$ ) 186.14; Found 186.28. IR  $\nu_{max}/cm^{-1}$ : 1134, 1234, 1658, 2976, 3329. Elemental Analysis: C, 58.35; H, 9.25; N, 15.12; O, 17.27; Found: C, 58.39; H, 9.27; N, 14.74; O, 17.60%.

### Synthesis of functional nitroxide radicals (d-f)

**4-oxiranyl-TEMPO (d)** To a two neck 100 mL round bottom flask equipped with a magnetic stirrer and Ar flow, sodium hydride (60 % dispersion in mineral oil) 0.8 g ( $2 \times 10^{-2}$  mol) was added, followed by 5 mL petroleum ether (40-60 °C) under argon protection. After stirring for a few minutes, the petroleum ether was removed by syringe. Subsequently, dry DMSO 10 mL was added to the flask via syringe and stirred for 30 min. Then 1.42 g ( $6.45 \times 10^{-3}$  mol) trimethylsulfoxonium iodide was added proportionally via spatula with positive argon flowing. The mixture was stirred at room temperature for another 30 mins until no bubble produced. Finally, nitroxide radical (**a**) 1.0 g, ( $5.88 \times 10^{-3}$  mol) was dissolved in 2 mL dry THF and added to the mixture via syringe during 20 mins. Reaction was left at room temperature for 4 h. The resulting mixture was diluted with Milli-Q water 100 mL and extracted with diethyl ether (3 x 50 mL). The extract was dried with  $MgSO_4$  and distilled under reduce pressure. Crude product was purified by column chromatography (silica gel) using EtOAc/Petroleum ether 40-60 °C (1/2, v/v) as the eluent. 0.6 g red solid radical (**d**) was obtained with a yield of 55.5%.  $R_f=0.72$  (EtOAc/Petroleum ether 40-60 °C, 1/2, v/v). ESI-MS: Cald. ( $C_{10}H_{18}NO_2+Na^+$ ) 207.12; found 207.18. IR  $\nu_{max}/cm^{-1}$ : 1160, 1232, 1367, 1463, 2941, 3410. Elemental Analysis: C, 65.19; H, 9.85; N, 7.60; O, 17.37; Found: C, 65.37; H, 9.95; N, 7.56; O, 17.12%.

**4-(hydroxymethyl)-2, 2, 6, 6-tetramethylpiperidin-4-ol-1-oxyl (e)** 4-spiroepoxy-TEMPO (**d**) 2.55 g ( $1.38 \times 10^{-2}$  mol) was dissolved in 20 mL DMSO in a round bottom flask equipped with magnetic stirrer. Then 15% NaOH solution 8 mL was charged to the mixture in one portion. The hydrolysis was carried out at 60 °C over 16 h. The resulting mixture was diluted with 100 mL Milli-Q water and

extracted with EtOAc (5 x 100 mL). The combined organic phase was dried over MgSO<sub>4</sub>, filtered and was concentrated under reduced pressure. The crude product was purified by column chromatography (silica gel) using EtOAc/Petroleum ether 40-60 °C (4/1, v/v) as the eluent. Finally, 1.23 g red solid (**e**) was obtained with a yield of 44.9%. R<sub>f</sub>=0.43 (EtOAc/Petroleum ether 40-60 °C, 4/1, v/v). ESI-MS: Cald. (C<sub>10</sub>H<sub>20</sub>NO<sub>3</sub>+Na<sup>+</sup>) 225.13; found 225.27. IR ν<sub>max</sub>/cm<sup>-1</sup>: 1043, 1091, 1172, 1242, 1313, 1348, 2920, 3377, 3487. Elemental Analysis: C, 59.38; H, 9.97; N, 6.92; O, 23.73; Found: C, 60.56; H, 10.13; N, 6.65; O, 22.66%.

**7, 7, 9, 9-tetramethyl-1, 3-dioxa-8-azaspiro [4.5] decan-2-one-8-oxyl (f)**. Nitroxide radical (**e**) 0.95 g (4.7 x 10<sup>-3</sup> mol) was dissolved in 1.5 mL MDF in a 20 mL vial with magnetic stirrer. Then dimethyl carbonate 0.6 mL (7.12 x 10<sup>-3</sup> mol) was added to the mixture followed with K<sub>2</sub>CO<sub>3</sub> 16 mg (1.16 x 10<sup>-4</sup> mol). The reaction was left at 80 °C overnight. After cooling down to room temperature, resulting mixture was diluted with 20 mL Milli-Q water and extracted with diethyl ether (3 x 30 mL). The organic phase was collected and dried with MgSO<sub>4</sub>. The crude product obtained after rotavapor was purified by column chromatography (silica gel) using EtOAc/petroleum ether 40-60 °C (3/1, v/v) as the eluent. Finally, 0.55 g pure red colour product was obtained with a yield of 51.4%. R<sub>f</sub>=0.77 (EtOAc/Petroleum ether 40-60 °C, 3/1, v/v). ESI-MS: Cald. (C<sub>11</sub>H<sub>18</sub>NO<sub>4</sub>+Na<sup>+</sup>) 251.11; found 251.18. IR ν<sub>max</sub>/cm<sup>-1</sup>: 1060, 1097, 1164, 1240, 1778, 2972. Elemental Analysis: C, 57.88; H, 7.95; N, 6.14; O, 28.04; Found: C, 58.31; H, 8.01; N, 6.16; O, 27.52%.

### Synthesis of functional nitroxide radicals (h-j)

**4-azido-2, 2, 6, 6-tetramethylpiperidin-1-oxyl (h)**. Nitroxide radical (**g**) 2.3 g (7.05 x 10<sup>-3</sup> mol) was dissolved in 12 mL DMSO, 4.6 g (7.07 x 10<sup>-2</sup> mol) sodium azide was added. The mixture was heated to 50 °C for 72h. The solvent was removed by air flow and the residual was dissolved in water and extracted by diethyl ether. The ether phase was dried and concentrated. The crude product was purified by column chromatography (silica gel) using EtOAc/Petroleum ether 40-60 °C (1/8, v/v) as the eluent, R<sub>f</sub>=0.24. Finally, 0.83 g pure red colour product was obtained with a yield of 60%. ESI-

MS: Cald. ( $C_9H_{17}N_4O+Na^+$ ) 220.13, Found 220.24. Elemental Analysis: C, 54.80; H, 8.69; N, 28.40; O, 8.11%; Found: C, 54.23; H, 8.76; N, 28.31; O, 8.7 %.

**4-bromo-2, 2, 6, 6-tetramethylpiperidin-1-oxyl (i).** 4-hydroxyl-TEMPO (**c**) 1.72 g ( $1.00 \times 10^{-2}$  mol) and  $CBR_4$  3.97 g ( $1.20 \times 10^{-2}$  mol) was dissolved in 30 mL DCM in a 100 mL round bottom flask equipped with magnetic stirrer. Triphenylphosphine 3.67 g ( $1.40 \times 10^{-2}$  mol) was added to the mixture proportionally via spatula during 30 mins. Reaction was left at room temperature for overnight. The resulting mixture was then concentrated and purified by column chromatography (silica gel) using EtOAc/Petroleum ether 40-60 °C (1/3, v/v) as the eluent. Finally, 0.23 g pure red colour product was obtained with a yield of 9.8%.  $R_f=0.88$  (EtOAc/Petroleum ether 40-60 °C, 1/1, v/v). ESI-MS: Cald. ( $C_9H_{17}BrNO+Na^+$ ) 257.04, 259.04; Found 257.16, 259.17. IR  $\nu_{max}/cm^{-1}$ : 638, 735, 1173, 1228, 1338, 1466, 2925. Elemental Analysis: C, 45.97; H, 7.29; N, 5.96; Found: C, 46.66; H, 7.59; N, 5.99%.

**4-iodo-2,2,6,6-tetramethylpiperidin-1-oxyl (j)** 4-tosylate-TEMPO (**g**) 1.9 g ( $5.82 \times 10^{-3}$  mol) and NaI 8.8 g ( $5.87 \times 10^{-2}$  mol) was dissolved together in 70 mL acetone with magnetic stirring. The mixture was refluxed at 70 °C overnight. Resulting mixture was concentrated by reduce pressure distillation, which was then diluted with 30 mL water. Diluted solution was then extracted with EtOAc (3 x 50 mL). The extract was dried with  $MgSO_4$  and distilled to remove the solvent. The crude product was purified by column chromatography (silica gel) using EtOAc/Petroleum ether 40-60 °C (1/3, v/v) as the eluent. Finally, 0.5 g pure red colour product was provided with a yield 30.5%.  $R_f=0.76$  (EtOAc/Petroleum ether 40-60 °C, 1/3, v/v). ESI-MS: Cald. ( $C_9H_{17}INO+H^+$ ) 283.04; found 283.16. IR  $\nu_{max}/cm^{-1}$ : 717, 1169, 1204, 1464, 1718, 2938, 2974, 2992. Elemental Analysis: C, 38.31; H, 6.07; I, 44.98; N, 4.96; Found: C, 40.00; H, 6.28; N, 5.14 %.

### Synthesis of functional nitroxide radicals (n-o)

**2, 2, 5, 5-tetramethyl-2,5-dihydro-1H-pyrrole-3-carboxamide-1-oxyl (n)** With water cooling and vigorous stirring, triacetoneamine (**1**) 17.6 g ( $1.14 \times 10^{-1}$  mol) was dissolved in 70 mL glacial acetic

acid. A solution of bromine 36.0 g ( $2.25 \times 10^{-1}$  mol) in 50 mL glacial acetic acid was dropped to the mixture during 30 mins. Then the mixture was left at room temperature stirring for overnight, during which, the colour of the mixture gradually fades and some white precipitate formed (a mixture of 3,3-dibromo-2,2,6,6-tetramethylpiperidin-4-one and 3,5-dibromo-2,2,6,6-tetramethylpiperidin-4-one). Subsequently, the precipitate was filtered; washed with acetic acid, water, and diethyl ether sequentially and successively. After drying under high vacuum, a white powder (**3**) 35.0 g was obtained with a yield of 98.8%. The second step was carried out with dissolving (**3**) 16.0 g ( $5.15 \times 10^{-2}$  mol) in 200 mL 28% aqueous ammonia under vigorous stirring. When the solution turns to transparent, potassium hydroxide pellet was added proportionally to saturate the solution and get some white precipitate of the amide. The white precipitate was pressed out on a Buchner funnel and dried under high vacuum. Finally, 2, 2, 5, 5-tetramethyl-2, 5-dihydro-1H-pyrrole-3-carboxamide (**4**) (6.5 g) was obtained with a yield of 75.06 %.  $R_f=0.2$  (DCM/MeOH, 9/1, v/v). ESI-MS: Cald. ( $C_9H_{16}N_2O+Na^+$ ) 191.12; found 191.10.  $^1H$  NMR (300 MHz, DMSO- $d_6$ )  $\delta$ : 1.16 (6H, s), 1.27 (6H, s), 1.79 (1H, s), 6.32 (1H, s), 6.80 (1H, s), 7.33 (1H, s);  $^{13}C$  NMR (300 MHz, DMSO- $d_6$ )  $\delta$ : 30.83, 30.88, 63.14, 66.40, 142.04, 142.06 and 166.63.

Oxidation of **4** to give nitrxide radical **n** was carried out in similar procedure as synthesis of **a**. Briefly, 2,2,5,5-tetramethyl-2,5-dihydro-1H-pyrrole-3-carboxamide (**4**) 5 g ( $2.97 \times 10^{-2}$  mol) was dissolved in 100 mL water, together with sodium tungstate dihydrate 0.1 g ( $3.03 \times 10^{-4}$  mol) and EDTA 0.1 g ( $3.42 \times 10^{-4}$  mol). With ice-water cooling,  $H_2O_2$  (30%) 5 ml was dropped to the mixture during five mins. The reaction was left at dark for overnight at room temperature. The yellow solid was filtered and washed with 30 mL Milli-Q water. The rest filtrate was extracted with EtOAc (3 x 100 mL). The organic phase was collected and dried with  $MgSO_4$ . After evaporation and drying under high vac, total 2.3 g yellow product was obtained with yield 42.3%.  $R_f=0.45$  (DCM/MeOH, 9/1, v/v). ESI-MS: Cald. ( $C_9H_{15}N_2O_2+Na^+$ ) 206.10; found 206.18. IR  $\nu_{max}/cm^{-1}$ : 1363, 1417, 1614, 1643, 1683, 2976,



3172, 3371. Elemental Analysis: C, 59.00; H, 8.25; N, 15.29; O, 17.46; Found: C, 58.50; H, 8.21; N, 14.69; O, 18.60%.

**2, 2, 5, 5-tetramethyl-2, 5-dihydro-1H-pyrrole-3-carboxylic-1-oxyl (o)** 2, 2, 5, 5-tetramethyl-2, 5-dihydro-1H-pyrrole-3-carboxamide-1-oxyl (**n**) 2 g ( $1.09 \times 10^{-2}$  mol) was charged to a 100 mL round bottom flask with 15% (w/w) aqueous NaOH solution 50 mL. The mixture was heated to 95 °C for overnight to get a transparent yellow liquid. Then with ice cooling, resulting mixture was acidified with HCl (36% aqueous solution) until pH=4 and extracted with EtOAc (4 x 100 mL). The organic phase was collected and dried with MgSO<sub>4</sub>. After evaporation and drying under high vac, total 1.9 g yellow product was obtained with yield 94.5%.  $R_f=0.37$  (DCM/MeOH, 9/1, v/v). ESI-MS: Cald. (C<sub>9</sub>H<sub>14</sub>NO<sub>3</sub>+Na<sup>+</sup>) 207.09; found 207.25. IR  $\nu_{\max}/\text{cm}^{-1}$ : 1630, 1709, 2983, 3093, 3203. Elemental Analysis: C, 58.68; H, 7.66; N, 7.60; O, 26.05; Found: C, 58.36; H, 8.16; N, 7.56; O, 25.91%.

#### **Synthesis of hetero-atom nitroxide radicals (p-r)**

**4-oxyl-3, 3, 5, 5-tetramethylmorpholin-2-one (p)** With magnetic stirring, 2-amino-2-methyl-1-propanol 8.92 g ( $1.0 \times 10^{-1}$  mol), CHCl<sub>3</sub> 12.50 mL ( $1.50 \times 10^{-1}$  mol) and acetone 75 mL (1.02 mol) were added to a 500 mL three-necked round bottom flask. Under the Ar atmosphere, sodium hydroxide powder 20 g ( $5.00 \times 10^{-1}$  mol) was added to the mixture proportionally with the temperature controlled below 5 °C. Resulting mixture was left at room temperature for overnight. The obtained slurry was then filtered on a frit and washed with acetone 100 mL and methanol 200 mL respectively. The filtrates were combined and concentrated under reduce pressure distillation. After further dried under high vacuum an amorphous white crude solid was obtained, to which a concentrated solution of hydrogen chloric acid 120 mL was added. The solution was refluxed at 105 °C for 6h, resulting dark yellow solution was cooled in ice-water bath and neutralised with sodium bicarbonate. The aqueous solution was subsequently extracted by DCM (3 x 200 mL). The DCM phase was collected and dried over MgSO<sub>4</sub> and filtered. Filtrate was concentrated to give a yellow oil crude product, which was purified by distillation under high vacuum. The purified product 3, 3, 5, 5-

tetramethylmorpholin-2-one (**8**) was a colourless transparent liquid (11.31 g, yield: 71.9%).  $R_f=0.62$  (DCM/MeOH, 9/1, v/v). ESI-MS: Cald. ( $C_8H_{15}NO_2+H^+$ ) 158.12; found 157.99.  $^1H$  NMR (400 MHz, DMSO- $d_6$ )  $\delta$ : 1.07 (6H, s) , 1.29 (6H, s), 4.15 (2H, s);  $^{13}C$  NMR (100 MHz,)  $\delta$ : 26.0, 30.7, 48.8, 54.4, 78.0, and 175.3.

To a 250 mL round bottom flask equipped with a magnetic stirrer, 3, 3, 5, 5-tetramethylmorpholin-2-one (**8**) 6.00 g ( $3.82 \times 10^{-2}$  mol) was dissolved in 60 mL DCM. Simultaneously, mCPBA 13.12 g ( $7.60 \times 10^{-2}$  mol) was dissolved in another vial with 60 mL DCM. With the temperature controlled under 0 °C in an ice-salt bath, mCPBA solution was added to the reactant via a pressure equalising dropping funnel during 1 h. Reaction was kept at 0 °C for 5h and subsequently at room temperature overnight. Resulting mixture was then cooled down again in ice-salt bath, the precipitated salt was filtered out and filtrate was washed with  $K_2CO_3/Na_2SO_3$  solution 100 mL. After drying with  $MgSO_4$ , DCM was removed to give a yellow liquid, which was further purified by column chromatography (silica gel) using DCM/MeOH mixture (DCM/MeOH, 95/5, v/v) as the eluent. The orange colour product fraction was collected, concentrated and dried under high vacuum to give a bright orange solid (**p**) 5.50 g with yield of 83.7%.  $R_f=0.68$  (EtOAc/Petroleum ether 40-60 °C, 1/1, v/v). ESI-MS: Cald. ( $C_8H_{14}NO_3+Na^+$ ) 195.09; found 195.08. IR  $\nu_{max}/cm^{-1}$ : 1363, 1419, 1643, 1685, 2977, 3172, 3367. Elemental Analysis: C, 55.80; H, 8.19; N, 8.13; O, 27.87; Found: C, 55.96; H, 8.22; N, 8.07; O, 27.75%.

**3, 3, 5, 5-tetramethylmorpholine-2-ol-4-oxyl (q)** 2, 2, 4, 4-tetramethyl-1, 3-oxazinan-6-one-3-oxyl (**p**) 0.10 g ( $5.81 \times 10^{-4}$  mol) and LiCl 0.01 g ( $2.36 \times 10^{-4}$  mol) dissolved in  $H_2O/MeOH$  (5/1, v/v) mixture 6 mL under magnetic stirring. Then  $NaBH_4$  0.07 g ( $1.85 \times 10^{-3}$  mol) was added to the mixture proportionally. Bubbles formed and the colour of the mixture changed to dark red immediately with addition of  $NaBH_4$ . Reaction was left at room temperature for 30 mins. Resulting solution was diluted with 20 mL Milli-Q water and extracted with EtOAc (3 x 20 mL). The organic phase was collected and dried over  $MgSO_4$ , filtered. The filtrate was concentrated and dried under high vacuum, a pure

orange colour solid (**q**) 0.07 g was obtained with a yield of 69.3%.  $R_f=0.5$  (EtOAc/Petroleum ether 40-60 °C, 3/1, v/v). ESI-MS: Cald. ( $C_8H_{16}NO_3+Na^+$ ) 197.10; found 197.13. IR  $\nu_{max}/cm^{-1}$ : 678, 1041, 1627, 1708, 2983, 3095. Elemental Analysis: C, 55.15; H, 9.26; N, 8.04; O, 27.55; Found: C, 53.85; H, 9.21; N, 7.80; O, 29.14 %.

**3, 3, 5, 5-tetramethylmorpholine-4-oxyl (r)** With ice-water cooling, lithium aluminium hydride 0.97g ( $2.56 \times 10^{-2}$  mol) was suspended in dry diethyl ether 60 mL in a round bottom flask equipped with magnetic stirrer within argon atmosphere. Then 3, 3, 5, 5-tetramethylmorpholin-2-one (**8**) 2.0 g ( $1.27 \times 10^{-2}$  mol) was slowly added to the suspension via syringe. After ten minutes, the ice-water bath was removed and the reaction was left at room temperature for another 20 mins. Subsequently, refluxed at 60 °C for 3h. After cooling down to room temperature, 1 mL  $H_2O$ , 1 mL 15% NaOH solution and 3 mL  $H_2O$  was added sequentially to quench the reaction. The white salt formed was filtered to provide transparent filtrate, which was concentrated to afford a white solid product (**9**) 1.35 g with yield of 66.0%. The product was used for next step without further purification. ESI-MS: Cald. ( $C_8H_{19}NO_2+H^+$ ) 162.15; Found 162.18.  $^1H$  NMR (400 MHz,  $CDCl_3$ )  $\delta$ : 1.15 (12H, s), 3.27 (4H, s);  $^{13}C$  NMR (100 MHz,  $CDCl_3$ )  $\delta$ : 27.0, 54.8, and 71.2.

Product (**9**) 0.2 g ( $1.24 \times 10^{-3}$  mol) was added to a 50 mL round bottom flask fitted with a reflux condenser. Then  $H_2SO_4$  (98 %) 3 mL was added. The reaction mixture was heated to 140 °C for overnight to provide a black liquid. The resulting mixture was then poured to 20 mL ice in a 250 mL beaker and basified with 50% aqueous KOH. Subsequently, the mixture was extracted with diethyl ether (4 x 50 mL). The organic phase was collected, dried with  $MgSO_4$ , and concentrated to give a pale yellow liquid 3,3,5,5-tetramethylmorpholine (**10**) 0.12 with a yield of 67.8%.  $R_f=0.65$  (DCM/MeOH, 9/1, v/v). ESI-MS: Cald. ( $C_8H_{17}NO+H^+$ ) 144.14; found 144.02.  $^1H$  NMR (400 MHz,  $CDCl_3$ )  $\delta$ : 1.13 (12H, s), 3.31 (4H, s);  $^{13}C$  NMR (100 MHz,  $CDCl_3$ )  $\delta$ : 28.2, 48.7, and 77.6.

To a 20 mL vial equipped with a magnetic stirrer, 3,3,5,5-tetramethylmorpholine (**10**) 0.12 g ( $8.39 \times 10^{-4}$  mol), sodium tungstate dihydrate 0.028 g ( $8.49 \times 10^{-5}$  mol) and EDTA 0.002 g ( $6.84 \times 10^{-6}$  mol)

were dissolved in water/methanol mixture (1/2, v/v) 3 mL. Then hydrogen peroxide (30% wt %) 150  $\mu$ L was dropped to the mixture via a pipette. Reaction was left at room temperature for overnight. Resulting mixture was then diluted with 3 mL H<sub>2</sub>O and extracted with diethyl ether (3 x 10 mL), organic phase was collected and dried over MgSO<sub>4</sub>, the solvent of which was subsequently removed under reduce pressure distillation. The crude product obtained was then purified by column chromatography (silica gel) using DCM/MeOH mixture (9/1, v/v) as the eluent. The yellow product fraction with R<sub>f</sub>=0.71 was collected, concentrated. A red liquid product (**r**) 84 mg was obtained with a yield of 63.6%. ESI-MS: Cald. (C<sub>8</sub>H<sub>16</sub>NO<sub>2</sub>+Na<sup>+</sup>) 181.11; Found 180.99.

### Synthesis of hetero-atom nitroxide radicals (**s-t**)

**2, 2, 7, 7-tetramethyl-1, 4-diazepan-5-one (5)** First, triacetoneamine (**1**) 3.1 g (2.0 x 10<sup>-2</sup> mol) was dissolved in 50 mL hydrochloride acid (36 %) with magnetic stirrer. Sodium azide 1.64 g (2.52 x 10<sup>-2</sup> mol) was added in small proportions during 20 mins, while keeping temperature below 35 °C. The mixture was left stirring at the room temperature overnight. The resulting solution was concentrated under airflow, and neutralised with saturated sodium carbonate solution in an ice-water bath, which was then further saturated with sodium hydroxide. The resulting basified solution was then extracted by EtOAc (3 x 100 mL). The organic phase was collected and dried over MgSO<sub>4</sub>, filtered. Filtrate was concentrated to give 1.8 g of pale yellow solid crude product with yield 52.9%. R<sub>f</sub>=0.35 (DCM/MeOH, 9/1, v/v). ESI-MS: Cald. (C<sub>9</sub>H<sub>18</sub>N<sub>2</sub>O+H<sup>+</sup>) 171.15; found 171.31. <sup>1</sup>H NMR (300 MHz, DMSO-*d*<sub>6</sub>)  $\delta$ : 1.02 (6H, s) , 1.09 (6H, s), 1.62 (1H, s), 2.39 (2H, s), 2.96 (2H, d, *J*=6 Hz), 7.52 (1H, s); <sup>13</sup>C NMR (75 MHz, DMSO-*d*<sub>6</sub>)  $\delta$ : 29.0, 31.8, 50.3, 50.5, 52.7, 52.8, and 174.6.

**2, 2, 7, 7-tetramethyl-5-homopiperazinone-1-oxyl (s)** To a 250 mL round bottom flask equipped with a magnetic stir bar, 2,2,7,7-tetramethyl-1,4-diazepan-5-one (**5**) 2.5 g (1.47 x 10<sup>-2</sup> mol), Sodium tungstate 0.66 g (2.0 x 10<sup>-3</sup> mol) and EDTA 0.04 g (1.37 x 10<sup>-4</sup> mol) were dissolved in 20 mL water. Then hydrogen peroxide (30% wt %) 8 mL (5.40 x 10<sup>-2</sup> mol) was added dropwise to the mixture via a pressure equalising dropping funnel. The resulting mixture turns to red gradually. After overnight

reaction, the mixture was extracted with EtOAc (3 x 50 mL). Organic phase was collected, dried over MgSO<sub>4</sub> and filtered. Filtrate was concentrated and the crude product obtained was purified by column chromatography (silica gel) using DCM/MeOH mixture (9/1, v/v) as the eluent. The red product fraction at an R<sub>f</sub>=0.55 was collected, concentrated and dried under vacuum. A red solid 1.65 g was obtained with a yield of 60.7%. ESI-MS: Cald. (C<sub>9</sub>H<sub>17</sub>N<sub>2</sub>O<sub>2</sub>+Na<sup>+</sup>) 208.12; found 208.19. IR ν<sub>max</sub>/cm<sup>-1</sup>: 1180, 1220, 1290, 1690, 2970, 3320. Elementary Analysis: C, 58.35; H, 9.25; N, 15.12; O, 17.27; Found: C, 58.17; H, 9.23; N, 14.98; O, 17.62 %.

**3, 3, 5, 5-tetramethyl-1-tosyl-1,4-diazepane (7)** With magnetic stirring, LiAlH<sub>4</sub> 0.50 g (1.32 x 10<sup>-2</sup> mol) was dispersed in 25 mL dry diethyl ether in a 50 mL round bottom flask in an ice-water bath. Then 2, 2, 7, 7-tetramethyl-1, 4-diazepan-5-one (**5**) 1.00 g (5.88 x 10<sup>-3</sup> mol) was added to the mixture proportionally. Then the reaction was stirred for 10 mins at 0 °C, followed by refluxing at 60 °C for 3 h. The mixture was cooled down and then sequentially quenched by 0.5 mL water, 0.5 mL 15% aqueous NaOH and 1.5 mL water. The white precipitate was filtered and filtrate was dried over MgSO<sub>4</sub>. The filtrate was concentrated to give a yellow oil (**6**). The intermediate (**6**) was dissolved in 30 mL DCM in a round bottom flask with magnetic stirring in an ice-water bath. Triethylamine 1 mL (7.17 x 10<sup>-3</sup> mol) was added to the solution via syringe. After that, *para*-toluenesulfonyl chloride 1.12 g (5.87 x 10<sup>-3</sup> mol) was added to mixture proportionally. The reaction was left to gradually warm to room temperature and stirring overnight to give a turbidity mixture before being quenched with 20 mL saturate K<sub>2</sub>CO<sub>3</sub> solution. The DCM phase was collected, dried over MgSO<sub>4</sub>, and filtered. The filtrate was concentrated and dried under high vacuum to give a yellow oil. Crude product was purified via column chromatography (silica gel) using DCM/MeOH mixture (9/1, v/v) as the eluent. The product fraction with an R<sub>f</sub> of 0.56 was collected, concentrated and dried under vacuum to give compound (**7**) as a pale yellow solid 0.62g with a total yield of 34.0%. ESI-MS: Cald. (C<sub>16</sub>H<sub>26</sub>N<sub>2</sub>O<sub>2</sub>S+H<sup>+</sup>) 311.18; found 311.20. <sup>1</sup>H NMR (400 MHz, CDCl<sub>3</sub>) δ: 1.15 (6H, s), 1.21 (6H, s), 1.80 (2H, t, J=5.88 Hz), 2.41 (3H, s), 3.11 (2H, s), 3.19 (2H, t, J=5.86 Hz), 7.29 (2H, d, J=8.28

Hz), 7.64 (2H, d,  $J=8.46$  Hz);  $^{13}\text{C}$  NMR (100 MHz,  $\text{CDCl}_3$ )  $\delta$ :21.5, 29.4, 31.4, 41.7, 45.6, 53.6, 55.1, 59.2, 127.2, 129.7, 135.5, 143.2.

**2, 2, 7, 7-tetramethyl-4-tosyl-1,4-diazepan-1-oxyl (t)** To a 50 mL round bottom flask equipped with a magnetic stirrer, 3,3,5,5-tetramethyl-1,4-diazepan-1-yl 4-methylbenzenesulfonate (**7**) 0.20 g ( $6.43 \times 10^{-4}$  mol), sodium tungstate 0.02 g ( $6.06 \times 10^{-5}$  mol) were dissolved in water/methanol mixture (1/1, v/v) 10 mL. Then hydrogen peroxide (30% wt %) 0.50 mL ( $3.37 \times 10^{-3}$  mol) was added dropwise to the mixture. The reaction mixture turned to yellow gradually overnight. The mixture was then diluted with 20 mL water and extracted with EtOAc (3 x 20 mL), organic phase was collected and dried over  $\text{MgSO}_4$ . After filtration, the filtrate was concentrated to give crude product, which was then purified by column chromatography (silica gel) using EtOAc/ Petroleum ether 40-60 °C mixture (1/1, v/v) as the eluent. The red product fraction at an  $R_f=0.74$  was collected, concentrated and dried under vacuum. A red solid (0.14 g) was obtained with a yield of 67.0%. ESI-MS: Cald. ( $\text{C}_{16}\text{H}_{25}\text{N}_2\text{O}_3\text{S}+\text{Na}^+$ ) 348.15; Found 348.11. IR  $\nu_{\text{max}}/\text{cm}^{-1}$ : 579, 660, 746, 815, 860, 1157, 1334, 2977. Elemental Analysis: C, 59.05; H, 7.74; N, 8.61; Found: C, 59.44; H, 7.82; N, 8.45.

## NMR Spectra

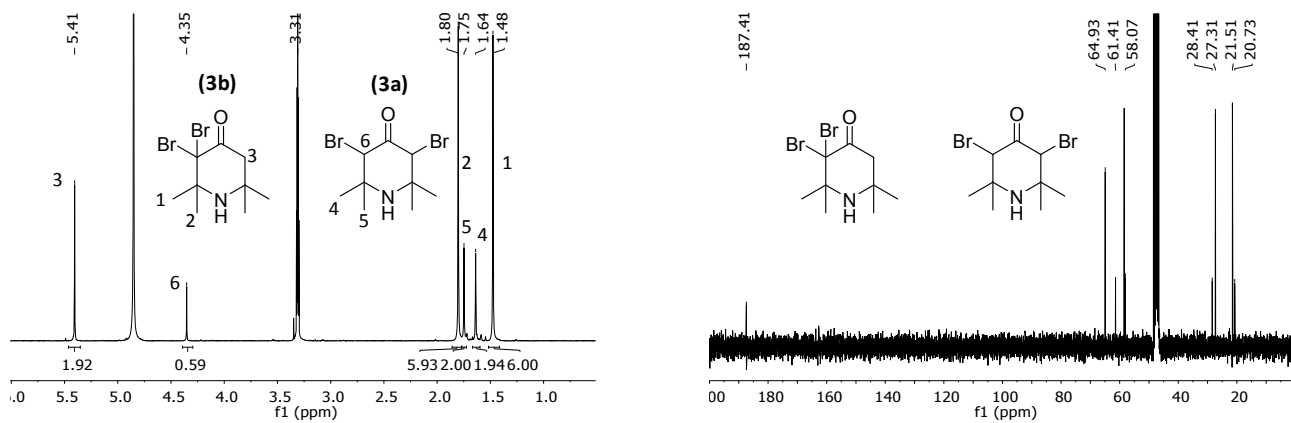

**Figure S1.** (A)  $^1\text{H}$  NMR and (B)  $^{13}\text{C}$  NMR of compound **3** in  $\text{MeOD-}d_4$ .

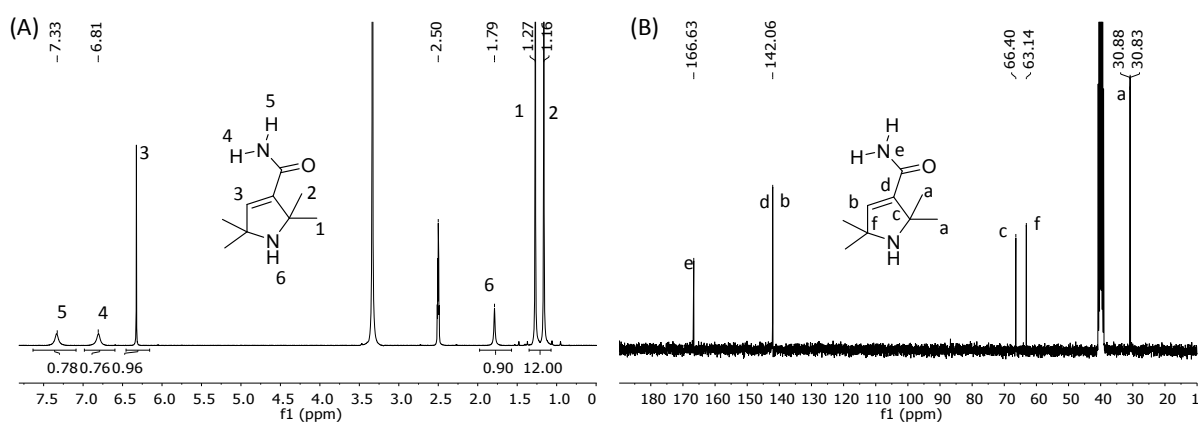

**Figure S2.** (A)  $^1\text{H}$  NMR and (B)  $^{13}\text{C}$  NMR of compound **4** in  $\text{DMSO-}d_6$ .

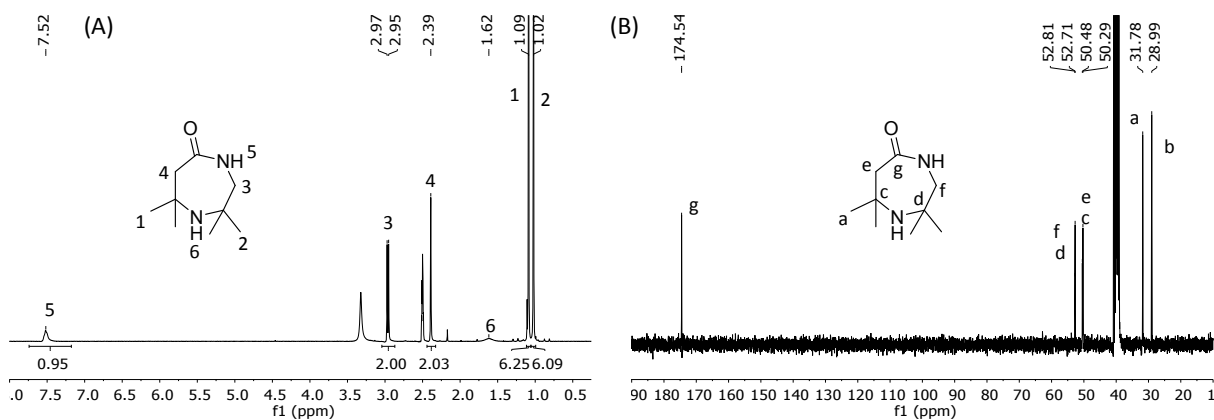

**Figure S3.** (A)  $^1\text{H}$  NMR and (B)  $^{13}\text{C}$  NMR of compound **5** in  $\text{DMSO-}d_6$ .

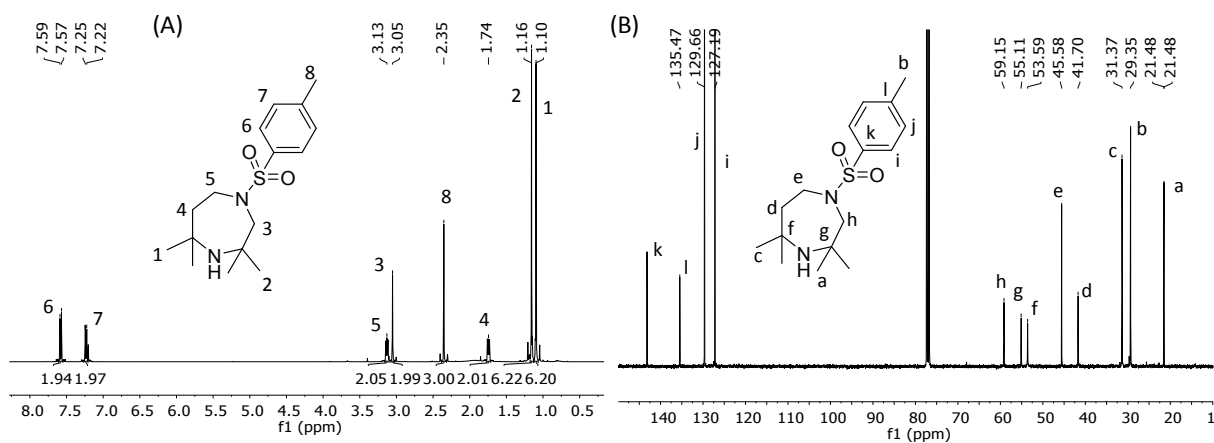

**Figure S4.** (A)  $^1\text{H}$  NMR and (B)  $^{13}\text{C}$  NMR of compound **7** in  $\text{CDCl}_3$ .



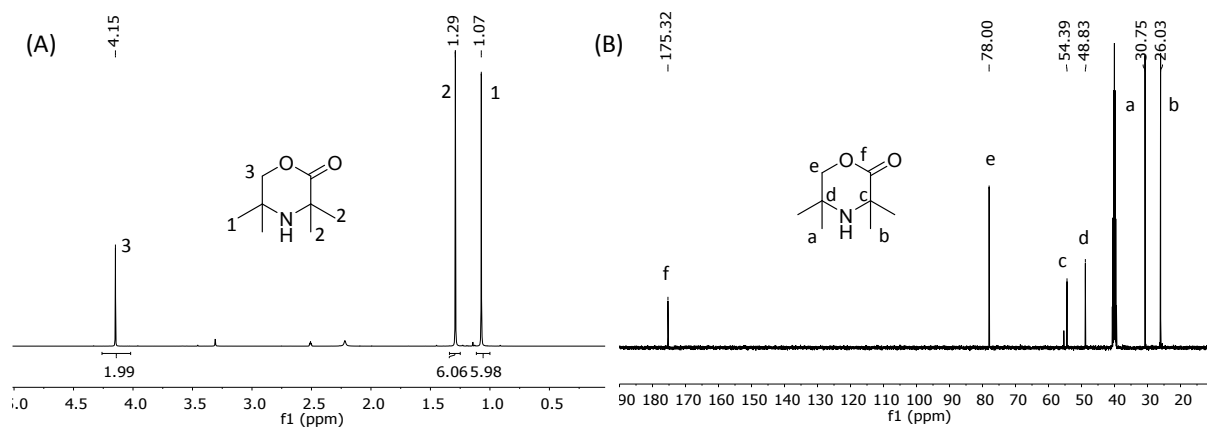

**Figure S5.** (A)  $^1\text{H}$  NMR and (B)  $^{13}\text{C}$  NMR of compound **8** in  $\text{DMSO-}d_6$ .

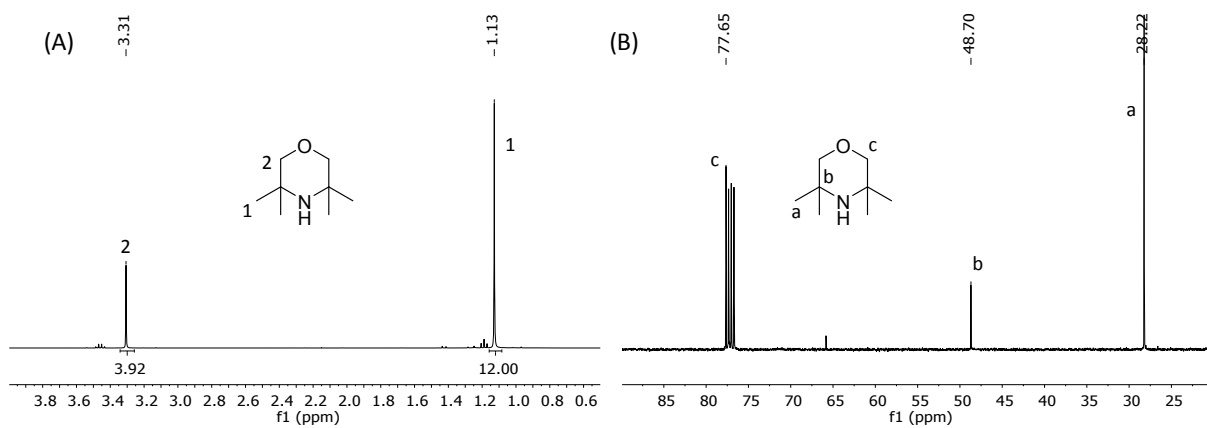

**Figure S6.** (A)  $^1\text{H}$  NMR and (B)  $^{13}\text{C}$  NMR of compound **10** in  $\text{CDCl}_3$ .

## Theoretical Methodology

Standard *ab initio* molecular orbital theory and density functional theory (DFT) calculations were carried out using Gaussian 09<sup>3</sup> with the exception of URCCSD(T) calculations, which were performed using Molpro 2015.<sup>4, 5</sup> Calculations on radicals were performed with an unrestricted wavefunction. Calculations were performed at a high-level of theory, with very similar theory shown to predict accurate values for the oxidation potential of a range of nitroxides.<sup>6</sup> Geometries of all species were optimised at the M06-2X<sup>S7</sup> level of theory using the 6-31+G(d,p)<sup>8-12</sup> basis set and frequencies, entropies and thermal corrections were also calculated at this level of theory. All geometries were verified as local minima (possessing no imaginary frequencies). Improved single-point energies were calculated using the high-level composite *ab initio* G3(MP2,CC)(+) method, a variation of standard G3(MP2,CC)<sup>13</sup> where calculations with the 6-31G(d) basis set are replaced with 6-31+G(d).

Although the more modern family of G4 methods<sup>14, 15</sup> include an extra basis set correction at the HF level (and utilise basis sets with additional polarisation functions), we used the older G3 variant because of previously noted concerns<sup>16, 17</sup> with the (non-cancelling) higher-level correction (HLC) of standard G4 theory. In G3 theory, the HLC term is generally small and only makes a minor contribution to absolute oxidation potentials. Moreover, this contribution is constant for all the oxidation reactions that we considered in this work. Thus, the G3 HLC fully cancels when calculating relative oxidation potentials and so G3(MP2,CC)(+) can be considered fully *ab initio* once applied to these reaction energies. In contrast, the HLC of standard G4 theory does not cancel for any radical reaction and has the potential (due to its mathematical formulation) to grow rapidly with system size.<sup>16, 17</sup> Some of the more recently developed G4 variants<sup>18</sup> do address this HLC ‘explosion’ problem, albeit through the introduction of several empirically fitted (energy component based) scaling

parameters. However, we should note that the performance of G3(MP2,CC)(+) has already been verified in previous studies of nitroxide oxidation potentials.<sup>6, 19</sup>

High-level calculations were utilized in conjunction with the ONIOM approximation<sup>20, 21</sup> for larger systems, with UMP2 used to model remote substituents effects. Solvation corrections were calculated using the polarisable continuum model (PCM)<sup>22</sup> (as implemented in Gaussian 09) at UB3LYP/6-31G(p) with  $\alpha = 1.45$ .<sup>3</sup> For consistency with experiment acetonitrile was used as the solvent. For all species in this study full systematic conformational searches (at a resolution of 120°) were performed to ensure global, and not merely local minima were located. In addition, we performed a thorough search of chair (with substituents axial and equatorial) and twist boat conformations. Lowest energy conformations were generally selected on the basis of their G3MP2-CC(+) solution-phase free-energies, although if several conformations were close in energy ( $< 5 \text{ kJ mol}^{-1}$ , of the global minimum oxoammonium cation or nitroxide radical) then Boltzmann averaging of these conformations (and the respective oxidation potentials and dipole/quadrupole terms) were performed. Relative oxidation potentials were calculated taking TEMPO as a reference. Theory was compared directly with experiment and the mean absolute deviation was 33 mV and maximum deviation 64 mV (Figure S7).

Dipole and quadrupole moments were calculated on the model species (see Figure S11) using M06-2X/6-31+G(d,p), preserving the substituent conformation of the nitroxide/oxoammonium analogue. If several nitroxide/oxoammonium conformations were close in energy (within 5 kJ/mol of the global minimum), the dipole and quadrupole parameters for the corresponding substituent conformations were weighted according to a Boltzmann distribution (using the nitroxide and oxoammonium conformational energies). Natural charges were calculated in Gaussian software via its built-in Natural Bond Orbital population analysis<sup>23</sup> at the M06-2X/6-31+G(d,p) level. If several nitroxide conformations were close in energy

(within 5 kJ/mol of the global minimum), the natural charges were weighted according to a Boltzmann distribution (using the nitroxide conformational energies).

**Table S1.** Comparison between oxidation potentials measured in this work and those in previous studies.

| Nitroxide   | $E_{ox}$ (mV vs. Fc/Fc <sup>+</sup> ) |               | Reference  |
|-------------|---------------------------------------|---------------|------------|
|             | This study                            | Previous work |            |
| TEMPO       | 234                                   | 226, 238, 239 | 24, 25, 26 |
| Nitroxide a | 410                                   | 428           | 25         |
| Nitroxide b | 284                                   | 296           | 25         |
| Nitroxide m | 315                                   | 300           | 24         |
| Nitroxide p | 636                                   | 691           | 26         |

**Table S2.** Oxidation potentials for previously studied nitroxides converted to Fc/Fc<sup>+</sup>. Chemical structures of these nitroxides are given in Figure S10.

| Nitroxide    | $E_{ox}$ (mV vs. Fc/Fc <sup>+</sup> ) | Reference |
|--------------|---------------------------------------|-----------|
| Nitroxide 1  | 352                                   | 24        |
| Nitroxide 3a | 386                                   | 24        |
| Nitroxide 3b | 472                                   | 24        |
| Nitroxide 3c | 551                                   | 24        |
| Nitroxide 4a | 421                                   | 24        |
| Nitroxide 4b | 471                                   | 24        |
| Nitroxide 4c | 499                                   | 24        |
| Nitroxide 4d | 399                                   | 24        |
| Nitroxide 4e | 406                                   | 24        |
| Nitroxide 4f | 383                                   | 24        |
| Nitroxide 4g | 475                                   | 24        |
| Nitroxide 4h | 506                                   | 24        |
| Nitroxide 4j | 524                                   | 24        |
| Nitroxide 4k | 336                                   | 24        |
| Nitroxide 7  | 443                                   | 24        |
| Nitroxide 8  | 340                                   | 25        |
| Nitroxide 9  | 299                                   | 25        |
| Nitroxide 10 | 276                                   | 26        |

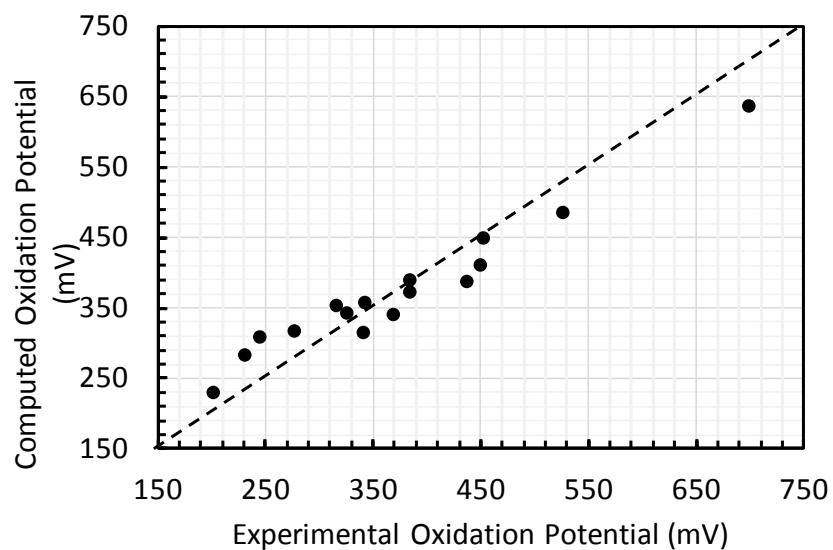

**Figure S7.** Comparison of computed and experimental oxidation potentials.

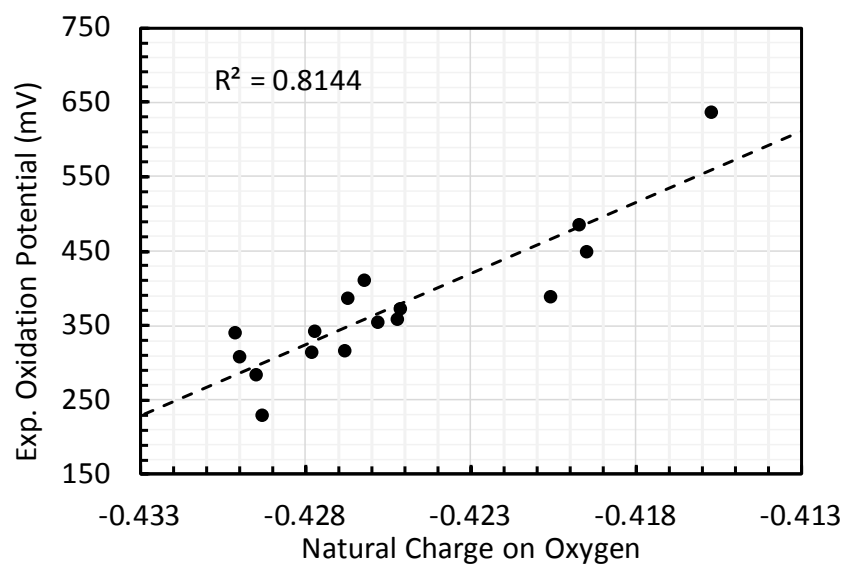

**Figure S8.** The correlation between the natural charge on oxygen of nitroxide radicals and their experimental oxidation potentials (vs Fc/Fc<sup>+</sup>).

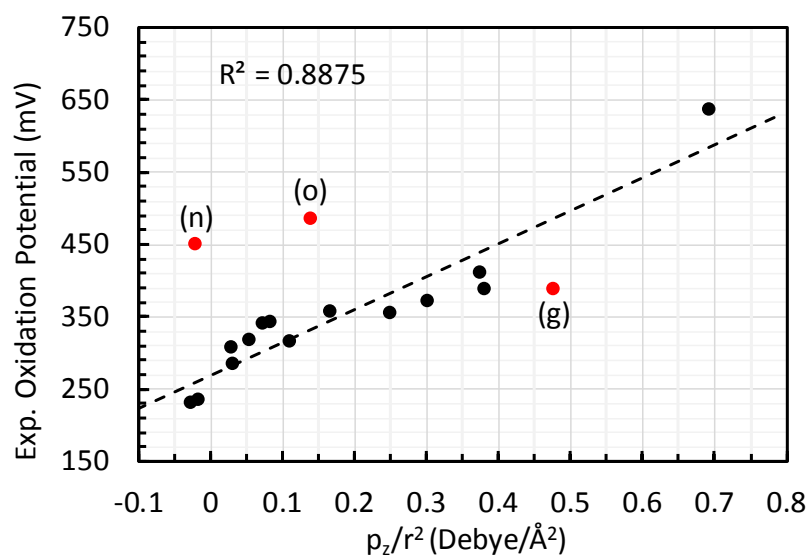

**Figure S9.** The correlation between the distance-scaled substituent dipole moment of the substituent and the experimentally determined oxidation potential of the nitroxide radicals (vs Fc/Fc<sup>+</sup>).

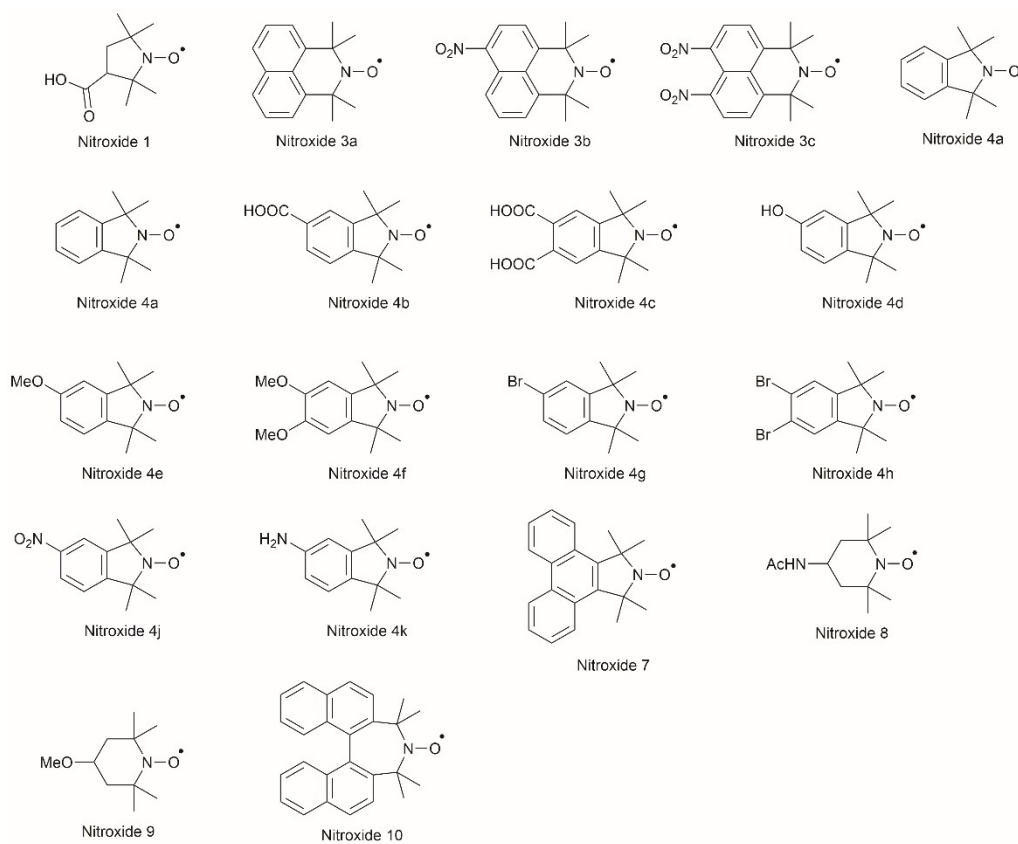

**Figure S10.** The chemical structures and abbreviations for the additional nitroxides, taken from previous work.

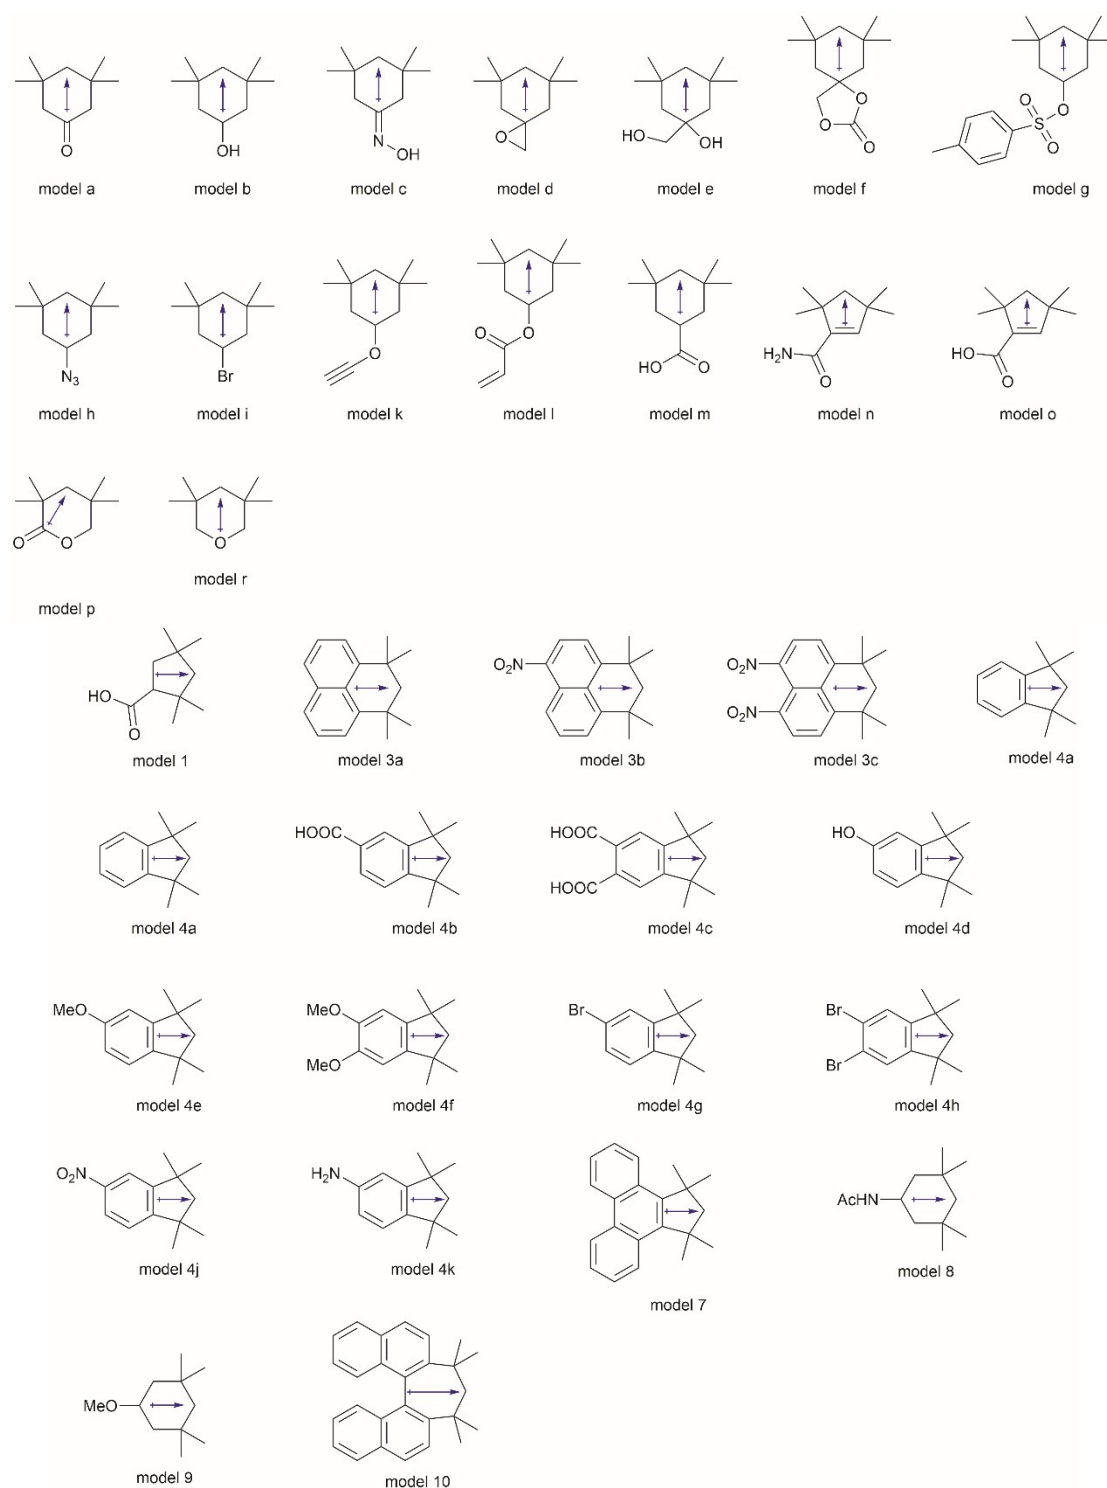

**Figure S11.** The model species used for the dipole and quadrupole analysis.

**Note:** The blue arrow depicts the defined z-axis. For all 6-membered species, the origin was defined by the atom in the 3-positions (except for model p, for which a larger dipole interaction with the carbonyl C atom in the 2 position would be anticipated). For 5- and 7-membered species, the origin was defined as the midpoint between the atoms in the 3- and 4- positions and 4- and 5- positions, respectively. The z axis was then defined from this origin to the opposite C atom (flanked by the tetra methyl groups).



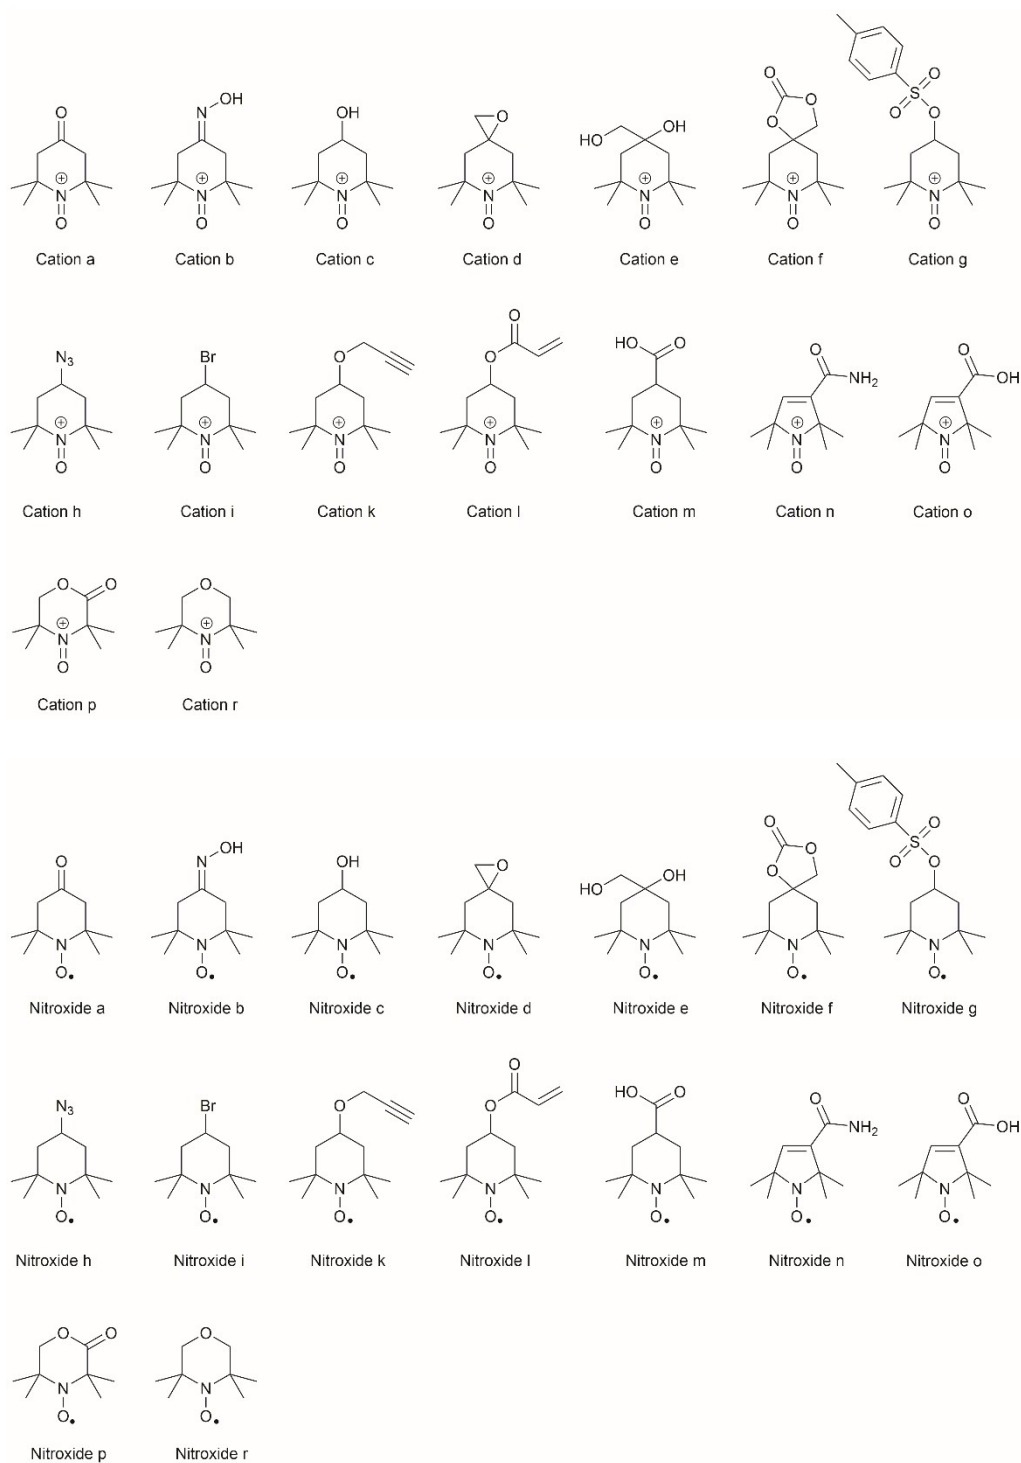

**Figure S12.** The chemical structures and abbreviations for nitroxides and cations studied in this work.

## Supporting computational data

**Table S3.** Conformational Populations of the Radicals and Cations for Nitroxides a - r

| Species       | Relative free-energy<br>(kJ mol <sup>-1</sup> ) | Relative Number of<br>Degenerate Conformations | Relative Mole<br>Fraction | Dipole (D) | Quadrupole (DÅ) | r     | Natural Charge<br>on Nitroxide O |
|---------------|-------------------------------------------------|------------------------------------------------|---------------------------|------------|-----------------|-------|----------------------------------|
| Cation TEMPO  | -                                               | -                                              | 1.000                     | -0.1401    | -0.0100         | 2.924 | -                                |
| Radical TEMPO | -                                               | -                                              | 1.000                     | -0.1401    | -0.0100         | 2.924 | -0.4331                          |
| Cation a.1    | 7.89                                            | 1                                              | 0.040                     | 2.9928     | -1.5329         | 2.863 | -                                |
| Cation a.2    | 0.0                                             | 1                                              | 0.960                     | 3.3714     | -2.5577         | 2.993 | -                                |
| Radical a.1   | 1.93                                            | 1                                              | 0.315                     | 2.9928     | -1.5329         | 2.863 | -0.4201                          |
| Radical a.2   | 0.0                                             | 1                                              | 0.685                     | 3.3714     | -2.5577         | 2.993 | -0.4290                          |
| Cation b.1    | 6.56                                            | 1                                              | 0.030                     | 1.7581     | -3.0668         | 2.928 | -                                |
| Cation b.2    | 4.78                                            | 2                                              | 0.123                     | 0.7033     | 0.6688          | 2.924 | -                                |
| Cation b.3    | 0.00                                            | 2                                              | 0.847                     | -0.4893    | 0.6158          | 2.949 | -                                |
| Radical b.1   | 0.38                                            | 1                                              | 0.255                     | 1.7581     | -3.0668         | 2.928 | -0.4285                          |
| Radical b.2   | 0.00                                            | 2                                              | 0.594                     | 0.7033     | 0.6688          | 2.924 | -0.4298                          |
| Radical b.3   | 3.39                                            | 2                                              | 0.151                     | -0.4893    | 0.6158          | 2.949 | -0.4303                          |
| Cation c.1    | 3.19                                            | 1                                              | 0.216                     | -0.1073    | -0.0997         | 2.902 | -                                |
| Cation c.2    | 0.0                                             | 1                                              | 0.784                     | 0.9522     | 3.7357          | 2.956 | -                                |
| Radical c.1   | 1.16                                            | 1                                              | 0.385                     | -0.1073    | -0.0997         | 2.902 | -0.4255                          |
| Radical c.2   | 0.0                                             | 1                                              | 0.615                     | 0.9522     | 3.7357          | 2.956 | -0.4330                          |
| Cation d.1    | 7.99                                            | 1                                              | 0.038                     | 1.8062     | -2.1486         | 2.883 | -                                |
| Cation d.2    | 0.0                                             | 1                                              | 0.962                     | 0.0869     | 2.1414          | 2.884 | -                                |
| Radical d.1   | 1.28                                            | 1                                              | 0.374                     | 1.8062     | -2.1486         | 2.883 | -0.4266                          |
| Radical d.2   | 0.0                                             | 1                                              | 0.626                     | 0.0869     | 2.1414          | 2.884 | -0.4269                          |
| Cation e.1    | 0.00                                            | 1                                              | 0.386                     | -1.6438    | 5.2222          | 2.957 | -                                |
| Cation e.2    | 0.00                                            | 1                                              | 0.386                     | 0.4918     | -3.4874         | 2.960 | -                                |
| Cation e.3    | 1.31                                            | 1                                              | 0.228                     | 1.1616     | -2.2300         | 2.961 | -                                |
| Radical e.1   | 0.00                                            | 1                                              | 0.441                     | -1.6438    | 5.2222          | 2.957 | -0.4311                          |
| Radical e.2   | 0.51                                            | 1                                              | 0.359                     | 0.4918     | -3.4874         | 2.960 | -0.4289                          |
| Radical e.3   | 1.97                                            | 1                                              | 0.199                     | 1.1616     | -2.2300         | 2.961 | -0.4282                          |
| Cation f      | -                                               | -                                              | 1.000                     | 3.2880     | -2.1385         | 2.943 | -                                |

|               |       |   |       |         |          |       |         |
|---------------|-------|---|-------|---------|----------|-------|---------|
| Radical f     | -     | - | 1.000 | 3.2880  | -2.1385  | 2.943 | -0.4206 |
| Cation g.1    | 0.00  | 2 | 0.927 | 4.1948  | -17.4025 | 2.897 | -       |
| Cation g.2    | 4.60  | 1 | 0.073 | -0.0932 | 9.9204   | 2.899 | -       |
| Radical g.1   | 0.00  | 2 | 0.988 | 4.1948  | -17.4025 | 2.897 | -0.4268 |
| Radical g.2   | 9.17  | 1 | 0.012 | -0.0932 | 9.9204   | 2.899 | -0.4261 |
| Cation h.1    | 0.66  | 2 | 0.372 | 2.5498  | -2.2085  | 2.917 | -       |
| Cation h.2    | 4.68  | 1 | 0.037 | 2.4374  | 0.2885   | 2.920 | -       |
| Cation h.3    | 0.00  | 2 | 0.485 | 1.1146  | 1.4126   | 2.952 | -       |
| Cation h.4    | 3.76  | 2 | 0.106 | 1.9470  | -0.9430  | 3.023 | -       |
| Radical h.1   | 0.00  | 2 | 0.799 | 2.5498  | -2.2085  | 2.917 | -0.4259 |
| Radical h.2   | 2.14  | 1 | 0.168 | 2.4374  | 0.2885   | 2.920 | -0.4248 |
| Radical h.3   | 8.42  | 2 | 0.027 | 1.1146  | 1.4126   | 2.952 | -0.4266 |
| Radical h.4   | 12.23 | 2 | 0.006 | 1.9470  | -0.9430  | 3.023 | -0.4315 |
| Cation i      | -     | - | 1.000 | 2.5359  | -1.0463  | 2.901 | -       |
| Nitroxide i   | -     | - | 1.000 | 2.5359  | -1.0463  | 2.901 | -0.4251 |
| Cation k.1    | 0.00  | 1 | 0.572 | -0.2435 | -0.1484  | 2.948 | -       |
| Cation k.2    | 6.50  | 1 | 0.042 | 0.6030  | -0.0648  | 2.924 | -       |
| Cation k.3    | 4.23  | 1 | 0.104 | 0.5988  | -0.5868  | 2.920 | -       |
| Cation k.4    | 2.77  | 1 | 0.187 | 0.0595  | 1.5051   | 3.026 | -       |
| Cation k.5    | 4.42  | 1 | 0.096 | 0.1881  | 1.5005   | 3.027 | -       |
| Nitroxide k.1 | 5.32  | 1 | 0.087 | -0.2435 | -0.1484  | 2.948 | -0.4298 |
| Nitroxide k.2 | 4.27  | 1 | 0.133 | 0.6030  | -0.0648  | 2.924 | -0.4297 |
| Nitroxide k.3 | 0.00  | 1 | 0.746 | 0.5988  | -0.5868  | 2.920 | -0.4298 |
| Nitroxide k.4 | 10.90 | 1 | 0.009 | 0.0595  | 1.5051   | 3.026 | -0.4354 |
| Nitroxide k.5 | 8.45  | 1 | 0.025 | 0.1881  | 1.5005   | 3.027 | -0.4346 |
| Cation l.1    | 0.36  | 1 | 0.268 | 0.4358  | 6.5036   | 2.905 | -       |
| Cation l.2    | 2.37  | 1 | 0.119 | 0.7817  | 4.2685   | 2.905 | -       |
| Cation l.3    | 0.00  | 1 | 0.309 | 0.9904  | -3.3120  | 2.944 | -       |
| Cation l.4    | 2.45  | 1 | 0.115 | 1.5286  | -4.7545  | 2.946 | -       |
| Cation l.5    | 3.78  | 1 | 0.067 | 0.8493  | 1.3671   | 3.018 | -       |
| Cation l.6    | 2.29  | 1 | 0.123 | 0.7716  | 1.2295   | 3.020 | -       |
| Nitroxide l.1 | 0.00  | 1 | 0.615 | 0.4358  | 6.5036   | 2.905 | -0.4276 |

|               |       |   |       |         |         |       |         |
|---------------|-------|---|-------|---------|---------|-------|---------|
| Nitroxide l.2 | 1.85  | 1 | 0.292 | 0.7817  | 4.2685  | 2.905 | -0.4274 |
| Nitroxide l.3 | 6.22  | 1 | 0.050 | 0.9904  | -3.3120 | 2.944 | -0.4290 |
| Nitroxide l.4 | 7.83  | 1 | 0.026 | 1.5286  | -4.7545 | 2.946 | -0.4287 |
| Nitroxide l.5 | 10.82 | 1 | 0.008 | 0.8493  | 1.3671  | 3.018 | -0.4334 |
| Nitroxide l.6 | 10.50 | 1 | 0.009 | 0.7716  | 1.2295  | 3.020 | -0.4340 |
| Cation m.1    | 0.11  | 1 | 0.241 | 1.8599  | -2.9961 | 2.923 | -       |
| Cation m.2    | 0.00  | 2 | 0.503 | 0.7583  | 4.3022  | 2.920 | -       |
| Cation m.3    | 2.95  | 2 | 0.153 | 0.2460  | 3.9157  | 3.024 | -       |
| Cation m.4    | 3.93  | 2 | 0.103 | 0.0818  | 1.9954  | 2.952 | -       |
| Radical m.1   | 1.19  | 1 | 0.235 | 1.8599  | -2.9961 | 2.923 | -0.4274 |
| Radical m.2   | 0.00  | 2 | 0.760 | 0.7583  | 4.3022  | 2.920 | -0.4279 |
| Radical m.3   | 18.52 | 2 | 0.000 | 0.2460  | 3.9157  | 3.024 | -0.4339 |
| Radical m.4   | 12.61 | 2 | 0.005 | 0.0818  | 1.9954  | 2.952 | -0.4284 |
| Cation n      | -     | - | 1.000 | -0.1002 | 7.0033  | 2.281 | -       |
| Radical n     | -     | - | 1.000 | -0.1002 | 7.0033  | 2.281 | -0.4195 |
| Cation o.1    | 0.00  | 1 | 0.789 | 0.4089  | 6.6060  | 2.283 | -       |
| Cation o.2    | 3.27  | 1 | 0.211 | 1.9227  | -3.6347 | 2.281 | -       |
| Radical o.1   | 0.00  | 1 | 0.791 | 0.4089  | 6.6060  | 2.283 | -0.4198 |
| Radical o.2   | 3.29  | 1 | 0.209 | 1.9227  | -3.6347 | 2.281 | -0.4195 |
| Cation r      | -     | - | 1.000 | 1.3241  | -0.4108 | 2.830 | -       |
| Nitroxide r   | -     | - | 1.000 | 1.3241  | -0.4108 | 2.830 | -0.4252 |
| Cation p      | -     | - | 1.000 | 4.6521  | -1.1516 | 2.593 | -       |
| Nitroxide p   | -     | - | 1.000 | 4.6521  | -1.1516 | 2.593 | -0.4157 |

**Table S4.** Conformational Populations of the Radicals and Cations for Nitroxides 1 - 10

| Species       | Relative free-energy (kJ mol <sup>-1</sup> ) | Relative # Degenerate Conformations | Relative Mole fraction | Dipole (D) | Quadrupole (DA) | r     |
|---------------|----------------------------------------------|-------------------------------------|------------------------|------------|-----------------|-------|
| Cation 1.1    | 0.00                                         | 1                                   | 0.750                  | 1.0422     | 0.6344          | 2.304 |
| Cation 1.2    | 4.23                                         | 1                                   | 0.136                  | 0.8971     | 2.8382          | 2.306 |
| Cation 1.3    | 4.66                                         | 1                                   | 0.114                  | -0.2292    | 0.5996          | 2.309 |
| Nitroxide 1.1 | 0.00                                         | 1                                   | 0.890                  | 1.0422     | 0.6344          | 2.304 |
| Nitroxide 1.2 | 5.33                                         | 1                                   | 0.106                  | 0.8971     | 2.8382          | 2.306 |
| Nitroxide 1.3 | 10.75                                        | 1                                   | 0.004                  | -0.2292    | 0.5996          | 2.309 |
| Cation 3a     | -                                            | -                                   | 1.000                  | 0.5980     | 3.8997          | 2.840 |
| Nitroxide 3a  | -                                            | -                                   | 1.000                  | 0.5980     | 3.8997          | 2.840 |
| Cation 3b     | -                                            | -                                   | 1.000                  | 5.7600     | -12.6535        | 2.854 |
| Nitroxide 3b  | -                                            | -                                   | 1.000                  | 5.7600     | -12.6535        | 2.854 |
| Cation 3c     | -                                            | -                                   | 1.000                  | 9.9267     | -24.0280        | 2.856 |
| Nitroxide 3c  | -                                            | -                                   | 1.000                  | 9.9267     | -24.0280        | 2.856 |
| Cation 4a     | -                                            | -                                   | 1.000                  | 0.4884     | 2.2741          | 2.284 |
| Nitroxide 4a  | -                                            | -                                   | 1.000                  | 0.4884     | 2.2741          | 2.284 |
| Cation 4b.1   | 0.13                                         | 1                                   | 0.486                  | 2.7843     | -7.6320         | 2.283 |
| Cation 4b.2   | 0.00                                         | 1                                   | 0.514                  | 1.4166     | 6.8182          | 2.283 |
| Radical 4b.1  | 0.00                                         | 1                                   | 0.538                  | 2.7843     | -7.6320         | 2.283 |
| Radical 4b.2  | 0.37                                         | 1                                   | 0.462                  | 1.4166     | 6.8182          | 2.283 |
| Cation 4c.1   | 2.81                                         | 1                                   | 0.164                  | 1.9705     | 11.4072         | 2.282 |
| Cation 4c.2   | 1.08                                         | 1                                   | 0.329                  | 2.9104     | 1.3280          | 2.282 |
| Cation 4c.3   | 0.00                                         | 1                                   | 0.508                  | 3.9128     | -10.0200        | 2.282 |
| Radical 4c.1  | 1.97                                         | 1                                   | 0.187                  | 1.9705     | 11.4072         | 2.282 |
| Radical 4c.2  | 0.00                                         | 1                                   | 0.414                  | 2.9104     | 1.3280          | 2.282 |
| Radical 4c.3  | 0.09                                         | 1                                   | 0.399                  | 3.9128     | -10.0200        | 2.282 |
| Cation 4d.1   | 0.00                                         | 1                                   | 0.550                  | -0.1005    | 7.0581          | 2.282 |
| Cation 4d.2   | 0.50                                         | 1                                   | 0.450                  | 1.2945     | -3.9199         | 2.282 |
| Radical 4d.1  | 0.00                                         | 1                                   | 0.513                  | -0.1005    | 7.0581          | 2.282 |
| Radical 4d.2  | 0.12                                         | 1                                   | 0.487                  | 1.2945     | -3.9199         | 2.282 |
| Cation 4e.1   | 0.15                                         | 1                                   | 0.485                  | 0.7091     | -1.5597         | 2.283 |

|              |      |   |       |         |          |       |
|--------------|------|---|-------|---------|----------|-------|
| Cation 4e.2  | 0.00 | 1 | 0.515 | -0.5217 | 8.5571   | 2.282 |
| Radical 4e.1 | 0.00 | 1 | 0.516 | 0.7091  | -1.5597  | 2.283 |
| Radical 4e.2 | 0.16 | 1 | 0.484 | -0.5217 | 8.5571   | 2.282 |
| Cation 4f.1  | 0.00 | 1 | 0.652 | 0.7129  | -4.5185  | 2.281 |
| Cation 4f.2  | 5.00 | 4 | 0.348 | 0.4611  | 1.1126   | 2.282 |
| Radical 4f.1 | 0.00 | 1 | 0.643 | 0.7129  | -4.5185  | 2.281 |
| Radical 4f.2 | 4.90 | 4 | 0.357 | 0.4611  | 1.1126   | 2.282 |
| Cation 4g    | -    | - | 1.000 | 2.4293  | -2.8375  | 2.282 |
| Nitroxide 4g | -    | - | 1.000 | 2.4293  | -2.8375  | 2.282 |
| Cation 4h    | -    | - | 1.000 | 3.6031  | -5.0163  | 2.280 |
| Nitroxide 4h | -    | - | 1.000 | 3.6031  | -5.0163  | 2.280 |
| Cation 4j    | -    | - | 1.000 | 5.6017  | -12.2917 | 2.261 |
| Nitroxide 4j | -    | - | 1.000 | 5.6017  | -12.2917 | 2.261 |
| Cation 4k    | -    | - | 1.000 | -0.4558 | 4.1589   | 2.283 |
| Nitroxide 4k | -    | - | 1.000 | -0.4558 | 4.1589   | 2.283 |
| Cation 7     | -    | - | 1.000 | 0.5056  | 5.4279   | 2.279 |
| Nitroxide 7  | -    | - | 1.000 | 0.5056  | 5.4279   | 2.279 |
| Cation 8     | -    | - | 1.000 | 0.8731  | 2.0407   | 2.919 |
| Radical 8    | -    | - | 1.000 | 0.8731  | 2.0407   | 2.919 |
| Cation 9.1   | 5.32 | 1 | 0.055 | 1.2896  | -1.8701  | 2.916 |
| Cation 9.2   | 0.00 | 2 | 0.945 | -0.6312 | 0.6578   | 2.950 |
| Radical 9.1  | 0.00 | 1 | 0.776 | 1.2896  | -1.8701  | 2.916 |
| Radical 9.2  | 4.80 | 2 | 0.224 | -0.6312 | 0.6578   | 2.950 |
| Cation 10    | -    | - | 1.000 | 0.4929  | 2.4489   | 3.032 |
| Radical 10   | -    | - | 1.000 | 0.4929  | 2.4489   | 3.032 |

**Table S5.** Total energies of all cations

| Species         | S (J/mol K) | Thermal Correction | ZPVE     | M06-2X/<br>6-31+G(d,p) | UMP2/<br>6-31+G(d) | UMP2/<br>GTMP2Large | URCCSD(T)/<br>6-31+G(d) | G <sub>gas</sub> (ONIOM) | ΔG <sub>solv</sub> (PCM) | G <sub>sol</sub> (ONIOM) |
|-----------------|-------------|--------------------|----------|------------------------|--------------------|---------------------|-------------------------|--------------------------|--------------------------|--------------------------|
| TEMPO cat       | 428.43      | 0.012720           | 0.265792 | -483.266593            | -481.853581        | -482.419218         | -482.011711             | -482.648703              | -0.054676                | -482.703380              |
| Cation a.1      | 449.31      | 0.013545           | 0.245943 | -557.243799            | -555.706656        | -556.326165         | -555.862949             | -556.594035              | -0.059585                | -556.653620              |
| Cation a.2      | 456.67      | 0.013766           | 0.245267 | -557.246193            | -555.709461        | -556.328625         | -555.865405             | -556.597437              | -0.059186                | -556.656624              |
| Cation b.1      | 452.95      | 0.014006           | 0.269942 | -558.456409            | -556.883762        | -557.530503         | -557.046988             | -557.790674              | -0.060971                | -557.851645              |
| Cation b.2      | 454.47      | 0.014076           | 0.269807 | -558.458749            | -556.886349        | -557.532538         | -557.049433             | -557.792803              | -0.059521                | -557.852324              |
| Cation b.3      | 449.24      | 0.013884           | 0.270323 | -558.463875            | -556.891788        | -557.536435         | -557.054652             | -557.795563              | -0.058581                | -557.854144              |
| Cation c.1      | 469.15      | 0.014597           | 0.263333 | -612.539771            | -610.859607        | -611.540058         | -611.029230             | -611.833308              | -0.055155                | -611.888463              |
| Cation c.2      | 476.52      | 0.014840           | 0.262767 | -612.540435            | -610.860562        | -611.540827         | -611.029996             | -611.835048              | -0.054629                | -611.889677              |
| Cation d.1      | 460.02      | 0.014257           | 0.275412 | -596.516099            | -594.846528        | -595.517198         | -595.017351             | -595.798875              | -0.058071                | -595.856945              |
| Cation d.2      | 455.76      | 0.014134           | 0.275715 | -596.522195            | -594.853511        | -595.523493         | -595.024089             | -595.804260              | -0.055728                | -595.859989              |
| Cation e.1      | 490.05      | 0.016041           | 0.303940 | -672.964798            | -671.107054        | -671.881149         | -671.290279             | -672.185976              | -0.054326                | -672.240302              |
| Cation e.2      | 490.08      | 0.016042           | 0.303939 | -672.964798            | -671.107049        | -671.881146         | -671.290276             | -672.185978              | -0.054326                | -672.240304              |
| Cation e.3      | 493.36      | 0.016216           | 0.303439 | -672.956775            | -671.098861        | -671.873735         | -671.282579             | -672.179758              | -0.060047                | -672.239805              |
| Cation f        | 505.05      | 0.016284           | 0.292628 | -785.060784            | -782.983378        | -783.837285         | -783.173845             | -784.199778              | -0.064366                | -784.264143              |
| Cation g.1 CORE | 556.25      | 0.018543           | 0.308810 | -1146.248343           | -1143.740641       | -1144.706944        | -1143.937153            | -                        | -                        | -                        |
| Cation g.2 CORE | 560.73      | 0.018610           | 0.308694 | -1146.248140           | -1143.740788       | -1144.707054        | -1143.937432            | -                        | -                        | -                        |
| Cation g.1      | 678.86      | 0.023580           | 0.389720 | -1377.216253           | -1374.062233       | -1375.249228        | -                       | -1375.551942             | -0.049418                | -1375.601360             |
| Cation g.2      | 682.66      | 0.023653           | 0.389708 | -1377.218728           | -1374.063505       | -1375.249477        | -                       | -1375.552693             | -0.0469156               | -1375.599608             |
| Cation h.1      | 493.83      | 0.015499           | 0.268776 | -646.787670            | -645.035018        | -645.735029         | -645.203865             | -646.042788              | -0.059425                | -646.102213              |
| Cation h.2      | 491.10      | 0.015440           | 0.269029 | -646.785882            | -645.033609        | -645.734011         | -645.202097             | -646.040906              | -0.059776                | -646.100682              |
| Cation h.3      | 490.64      | 0.015324           | 0.269159 | -646.790996            | -645.038930        | -645.738130         | -645.207077             | -646.044617              | -0.057848                | -646.102465              |
| Cation h.4      | 497.75      | 0.015600           | 0.268718 | -646.788473            | -645.036171        | -645.736039         | -645.204546             | -646.043727              | -0.057306                | -646.101033              |
| Cation i        | 469.13      | 0.014170           | 0.255683 | -3056.549860           | -3053.638010       | -3054.616208        | -3053.656829            | -3054.747903             | -0.057290                | -3054.805193             |
| Cation k.1      | 528.92      | 0.017106           | 0.308352 | -673.860834            | -671.966609        | -672.718365         | -672.164887             | -673.046593              | -0.050645                | -673.097238              |
| Cation k.2      | 527.31      | 0.017223           | 0.308064 | -673.858903            | -671.964116        | -672.716559         | -672.162578             | -673.044962              | -0.049800                | -673.094762              |

|            |        |          |          |             |             |             |             |             |           |             |
|------------|--------|----------|----------|-------------|-------------|-------------|-------------|-------------|-----------|-------------|
| Cation k.3 | 525.30 | 0.017145 | 0.308316 | -673.859481 | -671.964661 | -672.717471 | -672.162872 | -673.045220 | -0.050406 | -673.095625 |
| Cation k.4 | 526.78 | 0.017222 | 0.308132 | -673.860044 | -671.965248 | -672.717995 | -672.163138 | -673.045699 | -0.050485 | -673.096184 |
| Cation k.5 | 534.38 | 0.017333 | 0.308034 | -673.859698 | -671.965860 | -672.717808 | -672.163941 | -673.046551 | -0.049003 | -673.095555 |
| Cation l.1 | 541.64 | 0.017889 | 0.313883 | -749.135599 | -747.085480 | -747.910975 | -747.290896 | -748.269712 | -0.050358 | -748.320070 |
| Cation l.2 | 541.87 | 0.017880 | 0.313942 | -749.134205 | -747.084008 | -747.909798 | -747.289554 | -748.268641 | -0.050661 | -748.319302 |
| Cation l.3 | 537.49 | 0.017713 | 0.314147 | -749.136710 | -747.087319 | -747.911957 | -747.292320 | -748.269720 | -0.050485 | -748.320205 |
| Cation l.4 | 536.83 | 0.017681 | 0.31425  | -749.135223 | -747.085769 | -747.910747 | -747.290922 | -748.268516 | -0.050756 | -748.319273 |
| Cation l.5 | 546.47 | 0.018007 | 0.313778 | -749.134709 | -747.085047 | -747.910416 | -747.289993 | -748.269220 | -0.049545 | -748.318765 |
| Cation l.6 | 545.91 | 0.017996 | 0.313708 | -749.135503 | -747.085905 | -747.910988 | -747.290881 | -748.269838 | -0.049497 | -748.319335 |
| Cation m.1 | 503.24 | 0.015731 | 0.280879 | -671.776220 | -669.953588 | -670.703932 | -670.128912 | -671.016314 | -0.058501 | -671.074815 |
| Cation m.2 | 495.70 | 0.015613 | 0.281834 | -671.755431 | -669.955563 | -670.705971 | -670.131138 | -671.016912 | -0.057943 | -671.074855 |
| Cation m.3 | 498.61 | 0.015705 | 0.281006 | -671.779406 | -669.955836 | -670.706713 | -670.130903 | -671.018211 | -0.055521 | -671.073732 |
| Cation m.4 | 485.29 | 0.015365 | 0.281323 | -671.779466 | -669.954931 | -670.705913 | -670.130288 | -671.016211 | -0.057147 | -671.073357 |
| Cation n   | 485.92 | 0.015217 | 0.238381 | -611.392623 | -609.745022 | -610.407272 | -609.903377 | -610.706078 | -0.055378 | -610.761455 |
| Cation o.1 | 476.94 | 0.014734 | 0.226496 | -631.256995 | -629.590666 | -630.270521 | -629.743615 | -630.575269 | -0.053306 | -630.628575 |
| Cation o.2 | 477.54 | 0.014744 | 0.226453 | -631.254455 | -629.588752 | -630.267905 | -629.741584 | -630.572636 | -0.054692 | -630.627329 |
| Cation p   | 451.17 | 0.013484 | 0.221926 | -593.144327 | -591.576678 | -592.224529 | -591.721345 | -592.505062 | -0.060318 | -592.565379 |
| Cation r   | 426.54 | 0.012532 | 0.241620 | -519.147633 | -517.703648 | -518.294347 | -517.852483 | -518.538683 | -0.058326 | -518.597009 |

---

Unless otherwise noted units are in Hartree.



**Table S4.** Total energies of all radicals

| Species          | S (J/mol K) | Thermal Correction | ZPVE     | M06-2X/<br>6-31+G(d,p) | UMP2/<br>6-31+G(d) | UMP2/<br>GTMP2Large | URCCSD(T)/<br>6-31+G(d) | G <sub>gas</sub> (ONIOM) | ΔG <sub>soln</sub> (PCM) | G <sub>sol</sub> (ONIOM) |
|------------------|-------------|--------------------|----------|------------------------|--------------------|---------------------|-------------------------|--------------------------|--------------------------|--------------------------|
| TEMPO            | 431.72      | 0.012692           | 0.264452 | -483.523430            | -482.091358        | -482.662112         | -482.254390             | -482.902210              | 0.003139                 | -482.899071              |
| Radical a.1      | 453.93      | 0.013544           | 0.244951 | -557.515374            | -555.958683        | -556.582603         | -556.120363             | -556.861348              | 0.002215                 | -556.859132              |
| Radical a.2      | 465.13      | 0.013882           | 0.244031 | -557.514687            | -555.958467        | -556.582219         | -556.119395             | -556.862065              | 0.002199                 | -556.859866              |
| Radical b.1      | 456.30      | 0.013973           | 0.268846 | -558.719728            | -557.128223        | -557.779472         | -557.296448             | -558.050119              | 0.000876                 | -558.049243              |
| Radical b.2      | 456.70      | 0.013996           | 0.268749 | -558.719955            | -557.128674        | -557.779728         | -557.296701             | -558.050297              | 0.000908                 | -558.049388              |
| Radical b.3      | 452.02      | 0.013807           | 0.269163 | -558.718638            | -557.131557        | -557.782483         | -557.295481             | -558.048192              | 0.000096                 | -558.048096              |
| Radical c.1      | 474.55      | 0.014682           | 0.262108 | -612.801745            | -611.102604        | -611.787817         | -611.277681             | -612.092243              | 0.002598                 | -612.089646              |
| Radical c.2      | 486.98      | 0.015046           | 0.261279 | -612.800219            | -611.101534        | -611.786658         | -611.275970             | -612.092320              | 0.002231                 | -612.090089              |
| Radical d.1      | 462.76      | 0.014205           | 0.274326 | -596.780184            | -595.091723        | -595.766954         | -595.267578             | -596.059079              | 0.002789                 | -596.056290              |
| Radical d.2      | 461.57      | 0.014178           | 0.274416 | -596.780625            | -595.092913        | -595.767731         | -595.268693             | -596.059581              | 0.002805                 | -596.056776              |
| Radical e.1      | 496.98      | 0.016193           | 0.302449 | -673.216545            | -671.339755        | -672.119298         | -671.528230             | -672.435469              | 0.000526                 | -672.434943              |
| Radical e.2      | 496.54      | 0.016152           | 0.302527 | -673.215738            | -671.338877        | -672.118585         | -671.527606             | -672.434924              | 0.000175                 | -672.434749              |
| Radical e.3      | 494.85      | 0.016066           | 0.302539 | -673.214984            | -671.338015        | -672.117707         | -671.526929             | -672.434113              | -0.000080                | -672.434193              |
| Radical f        | 509.52      | 0.016288           | 0.291583 | -785.329605            | -783.232349        | -784.090807         | -783.428419             | -784.464422              | -0.000956                | -784.465378              |
| Radical g.1 CORE | 564.57      | 0.018555           | 0.307579 | -1146.510014           | -1143.983119       | -1144.955711        | -1144.185033            | -                        | -                        | -                        |
| Radical g.2 CORE | 567.82      | 0.018613           | 0.307654 | -1146.511337           | -1143.984683       | -1144.956269        | -1144.186648            | -                        | -                        | -                        |
| Radical g.1      | 671.74      | 0.023462           | 0.388791 | -1377.479301           | -1374.306733       | -1375.499284        | -                       | -1375.811607             | 0.007028                 | -1375.804579             |
| Radical g.2      | 683.77      | 0.023607           | 0.388693 | -1377.477625           | -1374.30354        | -1375.494756        | -                       | -1375.160104             | -1375.808449             | -1375.801087             |
| Radical h.1      | 497.46      | 0.015494           | 0.267665 | -647.054002            | -645.283219        | -645.988019         | -645.456044             | -646.305253              | 0.003331                 | -646.301922              |
| Radical h.2      | 494.63      | 0.015398           | 0.268047 | -647.053811            | -645.283181        | -645.988173         | -645.455869             | -646.304661              | 0.003554                 | -646.301107              |
| Radical h.3      | 490.57      | 0.015260           | 0.268133 | -647.052400            | -645.282100        | -645.986686         | -645.454178             | -646.302157              | 0.003442                 | -646.298714              |
| Radical h.4      | 506.07      | 0.015740           | 0.267364 | -647.048776            | -645.278782        | -645.983416         | -645.450710             | -646.300785              | 0.003522                 | -646.297263              |
| Radical i        | 473.98      | 0.014203           | 0.254500 | -3056.817038           | -3053.885594       | -3054.868219        | -3053.909489            | -3055.010659             | 0.004223                 | -3055.006436             |
| Radical k.1      | 526.70      | 0.017018           | 0.307079 | -674.115454            | -672.201161        | -672.958689         | -672.404862             | -673.297419              | 0.005769                 | -673.291650              |
| Radical k.2      | 530.62      | 0.017202           | 0.306723 | -674.116581            | -672.202035        | -672.959660         | -672.405616             | -673.298887              | 0.006837                 | -673.292050              |

|             |        |          |          |             |             |             |             |             |          |             |
|-------------|--------|----------|----------|-------------|-------------|-------------|-------------|-------------|----------|-------------|
| Radical k.3 | 530.38 | 0.017151 | 0.307030 | -674.118491 | -672.204501 | -672.962160 | -672.407809 | -673.300832 | 0.007155 | -673.293676 |
| Radical k.4 | 544.26 | 0.017581 | 0.306232 | -674.110812 | -672.197078 | -672.955065 | -672.400349 | -673.295643 | 0.006119 | -673.289524 |
| Radical k.5 | 541.96 | 0.017487 | 0.306496 | -674.113241 | -672.200253 | -672.957472 | -672.403087 | -673.297182 | 0.006725 | -673.290457 |
| Radical l.1 | 546.74 | 0.017901 | 0.312759 | -749.396272 | -747.327177 | -748.157518 | -747.537601 | -748.526923 | 0.006868 | -748.520054 |
| Radical l.2 | 547.81 | 0.017918 | 0.312736 | -749.395442 | -747.326190 | -748.156724 | -747.536798 | -748.526441 | 0.007092 | -748.519349 |
| Radical l.3 | 543.05 | 0.017753 | 0.312961 | -749.394607 | -747.326050 | -748.155849 | -747.536216 | -748.524523 | 0.006837 | -748.517686 |
| Radical l.4 | 542.66 | 0.017737 | 0.313020 | -749.394326 | -747.325423 | -748.155546 | -747.535809 | -748.524353 | 0.007283 | -748.517070 |
| Radical l.5 | 557.37 | 0.018198 | 0.312317 | -749.391122 | -747.322750 | -748.152984 | -747.532393 | -748.522962 | 0.007028 | -748.515934 |
| Radical l.6 | 557.20 | 0.018196 | 0.312285 | -749.391354 | -747.323029 | -748.153075 | -747.532670 | -748.523064 | 0.007012 | -748.516053 |
| Radical m.1 | 505.27 | 0.015728 | 0.279727 | -672.040085 | -670.197952 | -670.953201 | -670.378596 | -671.276257 | 0.001482 | -671.274775 |
| Radical m.2 | 500.84 | 0.015666 | 0.279614 | -672.041310 | -670.198594 | -670.954085 | -670.379326 | -671.276900 | 0.001673 | -671.275227 |
| Radical m.3 | 510.66 | 0.015909 | 0.279585 | -672.034132 | -670.192036 | -670.947250 | -670.371903 | -671.270102 | 0.001928 | -671.268174 |
| Radical m.4 | 489.44 | 0.015369 | 0.280113 | -672.038122 | -670.194241 | -670.950087 | -670.375028 | -671.271461 | 0.001036 | -671.270426 |
| Radical n   | 494.53 | 0.015366 | 0.237289 | -611.655798 | -609.989544 | -610.656448 | -610.152393 | -610.965637 | 0.000446 | -610.965191 |
| Radical o.1 | 492.24 | 0.014994 | 0.225378 | -631.523393 | -629.838095 | -630.522877 | -629.995296 | -630.838441 | 0.003394 | -630.835047 |
| Radical o.2 | 491.50 | 0.014950 | 0.225460 | -631.522224 | -629.837178 | -630.521505 | -629.994284 | -630.836852 | 0.003060 | -630.833793 |
| Radical p   | 459.64 | 0.013577 | 0.221115 | -593.424034 | -591.836311 | -592.487712 | -591.986800 | -592.779717 | 0.001514 | -592.778203 |
| Radical r   | 430.73 | 0.012547 | 0.240548 | -519.411999 | -517.949150 | -518.544381 | -518.102971 | -518.799206 | 0.002518 | -518.796688 |

Unless otherwise noted units are in Hartree.

**Table S5.** Total energies of all radicals and cations

| Species       | S<br>(J/mol K) | Thermal<br>Correction | ZPVE     | M06-2X/<br>6-31+G(d,p) | UMP2/<br>6-31+G(d) | UMP2/<br>GTMP2Large | URCCSD(T)/<br>6-31+G(d) | G <sub>gas</sub> (ONIOM) | ΔG <sub>solv</sub> (PCM) | G <sub>sol</sub> (ONIOM) |
|---------------|----------------|-----------------------|----------|------------------------|--------------------|---------------------|-------------------------|--------------------------|--------------------------|--------------------------|
| Cation 1.1    | 480.89         | 0.014837              | 0.250935 | -632.484204            | -630.790540        | -631.490270         | -630.949204             | -0.056764                | -631.786052              | -631.842816              |
| Cation 1.2    | 477.70         | 0.014765              | 0.251000 | -632.484033            | -630.789722        | -631.489627         | -630.948569             | -0.055967                | -631.785237              | -631.841204              |
| Nitroxide 1.1 | 495.60         | 0.015107              | 0.249484 | -632.746599            | -631.033624        | -631.738155         | -631.197114             | 0.002008                 | -632.045584              | -632.043576              |
| Nitroxide 1.2 | 493.10         | 0.015014              | 0.249517 | -632.744731            | -631.031082        | -631.735821         | -631.194913             | 0.001801                 | -632.043366              | -632.041566              |
| Cation 4b.1   | 534.45         | 0.017364              | 0.274045 | -784.864481            | -782.778884        | -783.599808         | -                       | -0.049943                | -783.369091              | -783.419034              |
| Cation 4b.2   | 533.91         | 0.017355              | 0.274081 | -784.865344            | -782.779818        | -783.600617         | -                       | -0.049274                | -783.369811              | -783.419086              |
| Radical 4b.1  | 550.15         | 0.017570              | 0.272921 | -785.129356            | -783.024462        | -783.850602         | -                       | 0.005291                 | -783.622585              | -783.617295              |
| Radical 4b.2  | 549.07         | 0.017552              | 0.272973 | -785.129449            | -783.024492        | -783.850664         | -                       | 0.005339                 | -783.622491              | -783.617152              |
| Cation 4c.1   | 599.30         | 0.020398              | 0.288802 | -973.370530            | -970.875821        | -971.881522         | -                       | -0.051394                | -971.640378              | -971.691772              |
| Cation 4c.2   | 600.14         | 0.020414              | 0.288800 | -973.370055            | -970.875509        | -971.881430         | -                       | -0.052063                | -971.640367              | -971.692430              |
| Cation 4c.3   | 602.86         | 0.020453              | 0.288767 | -973.368533            | -970.874827        | -971.880709         | -                       | -0.052892                | -971.639950              | -971.692842              |
| Radical 4c.1  | 614.84         | 0.020599              | 0.287736 | -973.638367            | -971.124586        | -972.135032         | -                       | 0.003681                 | -971.896517              | -971.892836              |
| Radical 4c.2  | 618.23         | 0.020632              | 0.287741 | -973.638338            | -971.124512        | -972.135323         | -                       | 0.003570                 | -971.897156              | -971.893587              |
| Radical 4c.3  | 617.98         | 0.020643              | 0.287756 | -973.637058            | -971.123971        | -972.134786         | -                       | 0.003012                 | -971.896564              | -971.893552              |
| Cation 4d.1   | 493.85         | 0.015670              | 0.263059 | -671.550885            | -669.715132        | -670.433126         | -669.889467             | -0.049258                | -670.761333              | -670.810591              |
| Cation 4d.2   | 493.86         | 0.015673              | 0.263068 | -671.549364            | -669.713656        | -670.431699         | -669.887995             | -0.050501                | -670.759899              | -670.810401              |
| Radical 4d.1  | 510.42         | 0.015949              | 0.261661 | -671.808714            | -669.954339        | -670.677281         | -670.133008             | 0.003697                 | -671.016791              | -671.013094              |
| Radical 4d.2  | 509.83         | 0.015937              | 0.261686 | -671.808560            | -669.954266        | -670.677104         | -670.132921             | 0.003474                 | -671.016521              | -671.013047              |
| Cation 4e.1   | 522.94         | 0.017061              | 0.291839 | -710.833128            | -708.871719        | -709.635346         | -709.063333             | -0.044669                | -709.982204              | -710.026872              |
| Cation 4e.2   | 523.41         | 0.017061              | 0.291870 | -710.834166            | -708.872756        | -709.636215         | -709.064126             | -0.044079                | -709.982851              | -710.026930              |
| Radical 4e.1  | 539.92         | 0.017278              | 0.290468 | -711.090085            | -709.109836        | -709.878561         | -709.305748             | 0.007474                 | -710.236768              | -710.229294              |
| Radical 4e.2  | 540.01         | 0.017271              | 0.290512 | -711.090061            | -709.109717        | -709.878281         | -709.305414             | 0.007012                 | -710.236247              | -710.229235              |

|              |        |          |          |             |             |             |             |           |             |             |
|--------------|--------|----------|----------|-------------|-------------|-------------|-------------|-----------|-------------|-------------|
| Cation 4f.1  | 567.52 | 0.019656 | 0.324990 | -825.313491 | -823.064584 | -823.957381 | -           | -0.041705 | -823.677182 | -823.718886 |
| Cation 4f.2  | 582.20 | 0.019929 | 0.324475 | -825.310085 | -823.063149 | -823.953344 | -           | -0.041928 | -823.675055 | -823.716983 |
| Radical 4f.1 | 581.22 | 0.019813 | 0.323738 | -825.567494 | -823.299854 | -824.197339 | -           | 0.007283  | -823.919791 | -823.912508 |
| Radical 4f.2 | 593.83 | 0.020051 | 0.323196 | -825.565874 | -823.300126 | -824.195046 | -           | 0.008590  | -823.919235 | -823.910645 |
| Cation 9.1   | 489.15 | 0.015418 | 0.297185 | -597.741958 | -596.044180 | -596.735284 | -596.224691 | -0.054103 | -597.015011 | -597.069114 |
| Cation 9.2   | 479.37 | 0.015109 | 0.297711 | -597.747325 | -596.050022 | -596.739960 | -596.230223 | -0.052987 | -597.018152 | -597.071139 |
| Radical 9.1  | 487.58 | 0.015509 | 0.298338 | -598.001615 | -596.284637 | -596.980738 | -596.470085 | 0.004223  | -597.270794 | -597.266571 |
| Radical 9.2  | 479.22 | 0.015224 | 0.298900 | -598.001483 | -596.284537 | -596.980023 | -596.469833 | 0.003857  | -597.268599 | -597.264743 |

---

## Optimised Gas-phase structures for all the species in this study

**Note:** Because of standard molecular reorientation, the dipole/quadrupoles of the Model species may not correspond with those listed in Table S3 and S4. Values given in these tables were found using separate single point energy calculations (run on these optimised structures).

### Cation TEMPO

1\1\GINC-R43\FOpt\RM062X\6-31+G(d,p)\C9H18N1O1(1+)\ROOT\17-Nov-2015\0\#M062X\6-31+G(d,p) I NT(grid=ultrafine) OPT IOP(2/17=4) Freq=noraman maxdisk=268435456\TEMPO\_rad.freq\1,1\C,-3.1885117 461,0.7292222402,-0.1527989793\N,-2.9999212228,-0.6594351796,-0.7661812384\C,-2.1020686494,-1.74881 87313,-0.1768783922\C,-0.8271032731,-1.0803092014,0.3641456646\C,-1.0875509624,0.1597794628,1.2120 239452\C,-1.8291300187,1.2051886194,0.3863541132\C,-3.7140540309,1.6456965322,-1.2520691813\C,-4.2 458501434,0.5698932296,0.9580208447\C,-2.9277249084,-2.4365857545,0.9288065381\C,-1.7920181186,-2. 7382272587,-1.2946682797\O,-3.6125549133,-0.9185131268,-1.7456850161\H,-0.1833938838,-0.8172904039,- 0.4842065688\H,-0.2981759552,-1.8494408009,0.9356739856\H,-0.1318371867,0.5755985433,1.5405998985\ H,-1.6396711617,-0.0911445069,2.1237030953\H,-1.2056044239,1.5142441307,-0.4615507761\H,-2.0322989 148,2.1058770216,0.9741082698\H,-3.0552019652,1.6474683884,-2.1242078981\H,-3.7395746241,2.6578228 03,-0.8417337096\H,-4.7230608955,1.3760617692,-1.5673592303\H,-3.863042209,0.0766933194,1.85004900 99\H,-5.1288845526,0.0385399667,0.5931612197\H,-4.5525254131,1.5812462909,1.2365964646\H,-3.024682 5895,-1.8355002344,1.8314680023\H,-2.3897543035,-3.3517644092,1.1886618248\H,-3.9194193117,-2.7200 99146,0.566355202\H,-1.3505296341,-2.2406762295,-2.1619894524\H,-2.676239215,-3.2924827693,-1.61272 40216\H,-1.0620355312,-3.4493093558,-0.9010774244\Version=ES64L-G09RevD.01\State=1-A\HF=-483.26 65929\RMSD=4.259e-09\RMSF=1.910e-05\Dipole=0.0860746,0.0344802,0.3352123\Quadrupole=-0.9631267, 4.4530206,-3.4898939,-2.9374227,-0.188231,0.0071713\PG=CS [SG(C1H2N1O1),X(C8H16)]\@

### Cation a.1

1\1\GINC-R206\FOpt\RM062X\6-31+G(d,p)\C9H16N1O2(1+)\ROOT\28-Apr-2016\0\#M062X\6-31+G(d,p) I NT(grid=ultrafine) OPT IOP(2/17=4) Freq=noraman maxdisk=402653184\NitroxideA.freq\1,1\C,-1.36270416 1,0.2926292976,0.0667096981\C,-1.2667457384,-1.0098047762,-0.74872888\C,0,-1.7688975728,-0.40375879 01\C,1.2667457384,-1.0098047762,-0.74872888\C,1.362704161,0.2926292976,0.0667096981\N,0,1.00264614 36,0.0137064406\O,0,-2.184833747,-0.0118373361\C,-1.6367005071,0.0071255119,1.5575791284\C,-2.40098 19701,1.2502719807,-0.5040175941\H,-1.280917248,-0.7785044612,-1.8204308692\H,2.1399609825,-1.6213 142607,-0.5094141014\H,1.280917248,-0.7785044612,-1.8204308692\H,2.1399609825,-1.6213142607,-0.509 4141014\C,2.4009819701,1.2502719807,-0.5040175941\C,1.6367005071,0.0071255119,1.5575791284\H,-1.05 34608039,-0.8287853687,1.9440984503\H,-2.6933162489,-0.2641381009,1.6266839752\H,-1.4753071203,0.8 974645603,2.1707243415\H,-2.1317283771,1.5855217176,-1.5089989399\H,-2.5515386106,2.1198945427,0.1 372154249\H,-3.3434597117,0.7013882569,-0.5675123445\H,2.1317283771,1.5855217176,-1.5089989399\H, 3.3434597117,0.7013882569,-0.5675123445\H,2.5515386106,2.1198945427,0.1372154249\H,1.0534608039,- 0.8287853687,1.9440984503\H,1.4753071203,0.8974645603,2.1707243415\H,2.6933162489,-0.2641381009,1. 6266839752\O,0,-2.8357501178,0.1547431072\Version=ES64L-G09RevD.01\State=1-A\HF=-557.2437991\ RMSD=3.184e-09\RMSF=1.264e-05\Dipole=0,1.2239249,-0.2320106\Quadrupole=9.4724916,-9.6707347,0.1 982431,0,0,1.6442208\PG=CS [SG(C1N1O2),X(C8H16)]\@

**Cation a.21** 1\1\GINC-R118\FOpt\RM062X\6-31+G(d,p)\C9H16N1O2(1+)\ROOT\28-Nov-2017\0\#M062X\6- 31+G(d,p) SCF=Tight INT(grid=ultrafine) OPT IOP(2/17=4) maxdisk=12GB\CatA.freq\1,1\C,-1.4720269874, -0.7374273605,1.5269506098\C,-2.8802480497,-0.9647130355,0.9948968429\C,-3.5368209385,0.2000966181,0 .2670652523\C,-3.0256575453,1.5844485049,0.6720119598\N,-1.503899024,1.5855088564,0.6362655555\C,- 0.6628248679,0.3237981661,0.7782342741\O,-3.4470164828,-2.0145445263,1.1426644245\C,-3.3675187502, 1.9221800576,2.1397566798\C,-3.518341881,2.6774570468,-0.2719876231\C,0.6194771343,0.6958336626,1. 5169708598\C,-0.3641359348,-0.0949666885,-0.6777004047\O,-0.9461324973,2.6186120555,0.4907617654\ H,-0.9305723005,-1.6858662512,1.4668918759\H,-1.5389120286,-0.4894312607,2.5932398981\H,-4.6116166 989,0.1607178184,0.4659909891\H,-3.418815292,0.0467420507,-0.8125146897\H,-3.0421993168,1.15376479 91,2.8440132719\H,-4.4564400716,1.9941969455,2.2001520889\H,-2.9391970177,2.8859143253,2.42418698 2\H,-3.1567359356,2.5127415159,-1.2908550026\H,-3.21725924,3.6706131899,0.0625426248\H,-4.60971735 25,2.6331538173,-0.2855207797\H,0.4002297095,1.1259174528,2.4982593373\H,1.2311739843,1.393803188 2,0.9446131836\H,1.1912487112,-0.2228185089,1.6667013616\H,-1.2586907825,-0.3826388181,-1.23383491 42\H,0.293709303,-0.9662577418,-0.6253630333\H,0.1583101533,0.7030741203,-1.2099933899\Version=ES 64L-G09RevD.01\State=1-A\HF=-557.2461932\RMSD=7.937e-09\RMSF=3.348e-05\Dipole=0.6513127,1.206 7431,-0.1695756\Quadrupole=5.4777972,-5.8727628,0.3949656,-8.6569715,0.613586,1.2326388\PG=C01 [X( C9H16N1O2)]\@

### Cation b.1

1\1\GINC-R2629\FOpt\RM062X\6-31+G(d,p)\C9H18N1O2(1+)\ROOT\28-Apr-2016\0\#M062X/6-31+G(d,p) INT(grid=ultrafine) OPT IOP(2/17=4) Freq=norman maxdisk=402653184\NitroxideC.1.freq\1,1\C,-0.375290 875,-1.3554753575,0.1004807035\C,1.0821577441,-1.2458160629,-0.3653000608\C,1.8132850155,0.,0.13104 05492\C,1.0821577441,1.2458160629,-0.3653000608\C,-0.375290875,1.3554753575,0.1004807035\N,-1.0587 527311,0.,-0.1072338917\O,-2.204991383,0.,-0.4009360226\C,-0.4997904045,-1.6627863464,1.6076302365\C,- 1.1533113663,-2.3862085549,-0.7117304777\H,1.1091573462,-1.2615853392,-1.4636968323\H,1.6015125097,- 2.1443539699,-0.0177877377\H,1.1091573462,1.2615853392,-1.4636968323\H,1.6015125097,2.1443539699,- 0.0177877377\C,-1.1533113663,2.3862085549,-0.7117304777\C,-0.4997904045,1.6627863464,1.6076302365\ H,0.1553559852,-1.0550414527,2.2301483646\H,-0.2068132971,-2.7083409249,1.7320869404\H,-1.53364633 68,-1.5577456129,1.9468157729\H,-1.2218349923,-2.099400228,-1.7643350783\H,-2.1575487597,-2.5478131 998,-0.3178179374\H,-0.60203443,-3.3273131739,-0.6498165863\H,-1.2218349923,2.099400228,-1.76433507 83\H,-0.60203443,3.3273131739,-0.6498165863\H,-2.1575487597,2.5478131998,-0.3178179374\H,0.1553559 852,1.0550414527,2.2301483646\H,-1.5336463368,1.5577456129,1.9468157729\H,-0.2068132971,2.7083409 249,1.7320869404\O,3.1590559865,0.,-0.2635952776\H,1.8530110936,0.,1.2255580398\H,3.2360857776,0.,-1.2 268580138\Version=ES64L-G09RevD.01\State=1-A\HF=-558.4564086\RMSD=2.296e-09\RMSE=4.976e-06\ Dipole=-0.8491717,0.,-0.1409338\Quadrupole=-7.1612742,6.881325,0.2799492,0.,-3.7677814,0.\PG=CS [SG( C1H2N1O2),X(C8H16)]\@

### Cation b.2

1\1\GINC-R1519\FOpt\RM062X\6-31+G(d,p)\C9H18N1O2(1+)\ROOT\28-Apr-2016\0\#M062X/6-31+G(d,p) INT(grid=ultrafine) OPT IOP(2/17=4) Freq=norman maxdisk=402653184\NitroxideC.2.freq\1,1\C,-0.363143 7294,-1.3442956211,0.1094969427\C,1.0977554404,-1.2252229877,-0.335910303\C,1.820338835,0.01950606 61,0.1613697877\C,1.0798366558,1.261484317,-0.3369482999\C,-0.3838245099,1.3617392486,0.1116675973 \N,-1.0540844502,0.0037130878,-0.1108734688\O,-2.1937589912,-0.0041331771,-0.429067558\C,-0.5103414 27,-1.6518594758,1.614579566\C,-1.1180677289,-2.3825790143,-0.7148232859\H,1.1555408985,-1.23129340 65,-1.4312309269\H,1.6189057717,-2.1208897733,0.0157048382\H,1.1338855552,1.2650770209,-1.43229620 52\H,1.5753605446,2.1747768759,0.0108074286\C,-1.1557244298,2.3902028923,-0.7093128354\C,-0.532237 8757,1.6641972094,1.6176133789\H,0.1327135486,-1.0405806465,2.2462714926\H,-0.213601384,-2.6958128 204,1.7432625259\H,-1.5496216729,-1.5523053702,1.9386179592\H,-1.1706526781,-2.0964357544,-1.76840 90075\H,-2.1270786306,-2.5535308176,-0.3373641024\H,-0.5584623226,-3.3180747497,-0.6440628363\H,-1. 2046884821,2.1061898274,-1.7636413424\H,-0.6123793477,3.3350548306,-0.6361023528\H,-2.1673253508,2.5 434527156,-0.3309794705\H,0.1181587892,1.0587010371,2.2474680976\H,-1.5697056579,1.5504988163,1.9 428055707\H,-0.2498806182,2.711835236,1.749184565\O,3.1080527938,-0.0489884663,-0.3989683173\H,1.8 767754117,0.0154384968,1.259508118\H,3.7075050426,0.5726844031,0.030972444\Version=ES64L-G09Re vD.01\State=1-A\HF=-558.4587492\RMSD=8.372e-09\RMSE=1.437e-05\Dipole=-0.4389027,0.3954982,0.717 1369\Quadrupole=-2.646132,6.2548872,-3.6087552,3.226526,2.4866534,0.0406346\PG=C01 [X(C9H18N1O2)]\ @

### Cation b.3

1\1\GINC-R111\FOpt\RM062X\6-31+G(d,p)\C9H18N1O2(1+)\ROOT\29-Apr-2016\0\#M062X/6-31+G(d,p) I NT(grid=ultrafine) OPT IOP(2/17=4) Freq=normanmaxdisk=402653184\CatC.3.freq\1,1\C,-0.0243265189,0. 0517895181,0.0303495806\C,0.0519418945,0.0483479968,1.5661860014\C,1.4543709877,0.0076030576,2.16 09268066\C,2.2146188102,-1.2046426631,1.6223715348\C,2.3077446057,-1.3070021536,0.0902315871\N,0.9 381658628,-1.001080134,-0.5104366101\O,0.6246677468,-1.5841737485,-1.4924645663\C,0.4094803265,1.3 897294804,-0.6090660337\C,-1.4245207715,-0.3241137242,-0.4480679135\H,-0.5100798207,-0.8143768145, 1.9422565315\H,-0.4654603526,0.9490869678,1.9091908602\H,1.7374933165,-2.1141652097,2.0069642932\ H,3.2435882053,-1.20430186,1.9967506708\C,2.6880535312,-2.7209648762,-0.3421386096\C,3.2786655758, -0.2840419799,-0.540039484\H,1.3378035689,1.7759279218,-0.1964618932\H,-0.3844660562,2.1047037388, -0.3775292282\H,0.4725237772,1.2917970639,-1.6961344283\H,-1.6909873949,-1.3438648712,-0.157505544 5\H,-1.5302162921,-0.2202251732,-1.5285832387\H,-2.1242058406,0.3626257415,0.0339224222\H,1.922582 657,-3.4491988937,-0.0610601773\H,3.6129809524,-2.9793666171,0.1787202951\H,2.8683792136,-2.787027 7896,-1.4157474996\H,3.1319703655,0.7241218608,-0.1610105085\H,3.2044286089,-0.3061776181,-1.63058 23798\H,4.2844717879,-0.611091075,-0.2627878234\H,1.3459542079,-0.1169754694,3.2447427203\O,2.1110 037911,1.2300515573,1.8719797634\H,2.7280850587,1.4587574245,2.5767063072\Version=ES64L-G09Rev D.01\State=1-A\HF=-558.463875\RMSD=8.964e-09\RMSE=1.074e-05\Dipole=0.1610078,-0.2401385,0.52349 93\Quadrupole=3.2803652,-3.3738368,0.0934717,-2.8270572,2.1292019,0.7684384\PG=C01 [X(C9H18N1O2)]\ @

### Cation c.1

1\1\GINC-R170\FOpt\RM062X\6-31+G(d,p)\C9H17N2O2(1+)\ROOT\28-Apr-2016\0\#M062X\6-31+G(d,p) I NT(grid=ultrafine) OPT IOP(2/17=4) Freq=noraman maxdisk=402653184\NitroxideB.1.freq\1,1\C,-1.354040 6302,0.2910595418,0.0485935033\C,-1.2384218497,-0.9737488223,-0.8221816937\C,0.0170822775,-1.72204 97875,-0.482775937\C,1.2853698397,-0.9817882927,-0.7695862077\C,1.3718831432,0.3144947128,0.062971 4206\N,0.0035165864,1.0118631811,0.0196626671\O,-0.0057265039,2.1952346895,0.006127714\C,-1.624787 1331,-0.0656080235,1.522791499\C,-2.3999143849,1.2618813685,-0.4822323413\H,-1.2242599106,-0.690538 0408,-1.8814579181\H,-2.1284093216,-1.5795910023,-0.6418185371\H,1.3432254487,-0.7304028885,-1.8356 194727\H,2.1540522226,-1.5947615042,-0.5151457442\C,2.3997415149,1.2876197904,-0.4992998448\C,1.65 06606308,0.0162149875,1.5490323569\H,-1.0315445038,-0.9144886362,1.8632697845\H,-2.6784299748,-0.3 504148996,1.5799247743\H,-1.4689371276,0.7948689569,2.178781886\H,-2.1370120772,1.6373253502,-1.47 45308092\H,-2.5544041279,2.1064607134,0.1908301981\H,-3.3387689391,0.7091491711,-0.5630861776\H,2. 1240503776,1.6338651782,-1.4988397843\H,3.3456336141,0.7458065845,-0.5746615563\H,2.5479705957,2. 1505719912,0.1512890741\H,1.0776150301,-0.8335096224,1.9190031056\H,1.4731957599,0.8953869565,2.1 739641193\H,2.7117877124,-0.237391755,1.6160391976\N,0.0940712595,-2.8563698962,0.094195269\O,-1.1 404469257,-3.3941092755,0.3659836922\H,-0.9478526029,-4.2692407267,0.7287357621\Version=ES64L-G0 9RevD.01\State=1-A\HF=-612.5397711\RMSD=9.894e-09\RMSE=1.846e-05\Dipole=0.0761396,0.5988534,0. 1001257\Quadrupole=3.9726204,-0.0373741,-3.9352463,1.8378574,-0.3701641,-1.9127442\PG=C01 [X(C9H1 7N2O2)]\@

### Cation c.2

1\1\GINC-R51\FOpt\RM062X\6-31+G(d,p)\C9H17N2O2(1+)\ROOT\29-Nov-2017\0\#M062X\6-31+G(d,p) S CF=Tight INT(grid=ultrafine) OPT IOP(2/17=4) maxdisk=12GB\RadC2.freq\1,1\C,-1.6170450992,-0.627911 8604,1.7158845717\C,-2.9972679143,-0.8216474038,1.1563441959\C,-3.7003379019,0.3458128709,0.513531 5605\C,-3.0412975287,1.7055579219,0.7630231605\N,-1.5315000571,1.581914215,0.5998624219\C,-0.76955 8597,0.2813057968,0.8217386871\N,-3.4917617196,-1.9950526532,1.1907850054\C,-3.2272347156,2.188167 7956,2.2187855135\C,-3.5308704294,2.7616997484,-0.2233002614\C,0.5759647181,0.6260077997,1.4510241 735\C,-0.6030786358,-0.2953648008,-0.599102554\O,-0.9191902961,2.5446821745,0.2859150675\H,-1.11583 1207,-1.5975249916,1.7787278021\H,-1.6449012617,-0.2213033874,2.7331903335\H,-4.7276497275,0.40617 64294,0.8902217948\H,-3.7976394739,0.1601406181,-0.563992705\H,-2.9540418284,1.434768727,2.9586458 958\H,-4.2914675126,2.4066889695,2.3381846805\H,-2.6645782456,3.1071866703,2.3990102124\H,-3.25525 98415,2.5032526965,-1.2494443772\H,-3.1459098053,3.7536343104,0.0150637644\H,-4.6211076536,2.78787 76035,-0.1593135485\H,0.4451525316,1.1414322898,2.4067137907\H,1.1895417035,1.2388192122,0.790162 7823\H,1.1014022694,-0.313205045,1.6383464516\H,-1.5588538068,-0.5132506114,-1.081280776\H,-0.0569 648517,-1.2366783964,-0.4970357367\H,-0.0198351962,0.3843897303,-1.2241915851\O,-4.7443099983,-2.02 64918459,0.6259989786\H,-5.0305279175,-2.944904584,0.7199306998\Version=ES64L-G09RevD.01\State= 1-A\HF=-612.5404354\RMSD=4.450e-09\RMSE=3.542e-06\Dipole=0.4077817,0.6334546,0.0045023\Quadrup ole=3.9959444,1.1492574,-5.1452018,-0.7878242,0.1609747,1.3125631\PG=C01 [X(C9H17N2O2)]\@

### Cation d.1

1\1\GINC-R126\FOpt\RM062X\6-31+G(d,p)\C10H18N1O2(1+)\ROOT\19-Jun-2017\0\#M062X\6-31+G\*\* S CF=Tight INT(grid=ultrafine) OPT IOP(2/17=4) maxdisk=1610612736\NitroxideD.1.freq\1,1\C,0.142927976 2,0.5211271855,-1.3585923094\C,0.5115257293,-0.9657574521,-1.2560469683\C,-0.0048644807,-1.62608204 54,0.\C,0.5115257293,-0.9657574521,1.2560469683\C,0.1429279762,0.5211271855,1.3585923094\N,0.41108 30962,1.1817129785,0.\O,0.8071895382,2.2965607253,0.\C,-1.35696224,0.7361573114,-1.6445694588\C,0.99 32434358,1.2467271732,-2.394842199\H,1.6031018351,-1.0756324877,-1.2858906232\H,0.1126347393,-1.46 56427951,-2.1439097572\H,1.6031018351,-1.0756324877,1.2858906232\H,0.1126347393,-1.4656427951,2.14 39097572\C,0.9932434358,1.2467271732,2.394842199\C,-1.35696224,0.7361573114,1.6445694588\H,-1.9996 753298,0.099623262,-1.0380021139\H,-1.5095245591,0.4711334451,-2.694043139\H,-1.6405218412,1.78405 66444,-1.5160911991\H,2.0511870875,1.2451014677,-2.1201028489\H,0.66431939,2.2751122674,-2.5502895 22\H,0.8852691309,0.7032189512,-3.3364341652\H,2.0511870875,1.2451014677,2.1201028489\H,0.8852691 309,0.7032189512,3.3364341652\H,0.66431939,2.2751122674,2.550289522\H,-1.9996753298,0.099623262,1. 0380021139\H,-1.6405218412,1.7840566444,1.5160911991\H,-1.5095245591,0.4711334451,2.694043139\O,0.0 643417849,-3.0316868322,0.\C,-1.2314971777,-2.449017622,0.\H,-1.7931417345,-2.5767035765,-0.92361837 68\H,-1.7931417345,-2.5767035765,0.9236183768\Version=ES64L-G09RevE.01\State=1-A\HF=-596.516099 2\RMSD=7.458e-09\RMSE=1.377e-05\Dipole=-0.4724217,1.2098194,0.\Quadrupole=-0.4045955,-7.2753881,7.6 799836,3.0096789,0.,0.\PG=CS [SG(C2N1O2),X(C8H18)]\@

### Cation d.2

1\1\GINC-R140\FOpt\RM062X\6-31+G(d,p)\C10H18N1O2(1+)\ROOT\19-Jun-2017\0\#M062X\6-31+G\*\* S  
CF=Tight INT(grid=ultrafine) OPT IOP(2/17=4) maxdisk=1610612736\NitroxideD.2.freq\1,1\C,0.137113525  
2,-0.5048768342,-1.3548337404\C,-0.9933553108,0.5353819429,-1.2590225256\C,-0.9246829742,1.36365344  
48,0\C,-0.9933553108,0.5353819429,1.2590225256\C,0.1371135252,-0.5048768342,1.3548337404\N,0.26562  
8807,-1.2046991797,0\O,0.5306677672,-2.3586650251,0\C,1.5080427688,0.1490989161,-1.6305570915\C,-0.1  
660157178,-1.5756727839,-2.3958735875\H,-1.9632875383,0.0263052516,-1.3093769822\H,-0.9083613214,1.1  
765333775,-2.1415130469\H,-1.9632875383,0.0263052516,1.3093769822\H,-0.9083613214,1.1765333775,2.1  
415130469\C,-0.1660157178,-1.5756727839,2.3958735875\C,1.5080427688,0.1490989161,1.6305570915\H,1.  
6735795026,1.0481039051,-1.0398953541\H,1.498282107,0.4379214875,-2.6848470173\H,2.3213544229,-0.5  
667198401,-1.4842652019\H,-1.0485914204,-2.162815466,-2.1285545674\H,0.6785472039,-2.2488509965,-2.  
549522595\H,-0.370384025,-1.0599011973,-3.3370937179\H,-1.0485914204,-2.162815466,2.1285545674\H,-  
0.370384025,-1.0599011973,3.3370937179\H,0.6785472039,-2.2488509965,2.549522595\H,1.6735795026,1.0  
481039051,1.0398953541\H,2.3213544229,-0.5667198401,1.4842652019\H,1.498282107,0.4379214875,2.684  
8470173\C,-1.3402659964,2.7739899789,0\O,0.0381548292,2.4103941284,0\H,-1.6968855276,3.2234006388,0  
.9233315536\H,-1.6968855276,3.2234006388,-0.9233315536\Version=ES64L-G09RevE.01\State=1-A\HF=-5  
96.522195\RMSD=6.296e-09\RMSF=1.640e-05\Dipole=-0.4636862,-0.5022883,0\Quadrupole=-2.3948317,-3.  
1861004,5.5809321,-4.4701458,0,0\PG=CS [SG(C2N1O2),X(C8H18)]\@

### Cation e.1

1\1\GINC-R2456\FOpt\RM062X\6-31+G(d,p)\C10H20N1O3(1+)\ROOT\19-Jun-2017\0\#M062X\6-31+G\*\* S  
CF=Tight INT(grid=ultrafine) OPT IOP(2/17=4) maxdisk=1610612736\CationE.1ii.freq\1,1\C,-0.0126374304,0  
.0058393822,0.0276634435\C,0.0119449172,-0.0561798744,1.5617090728\C,1.4024970415,-0.0532586055,2.  
2109775921\C,2.2274910379,-1.2064224985,1.6513655748\C,2.3756089579,-1.2492526107,0.1218969224\N,  
1.0198561949,-0.9745855314,-0.5218541763\O,0.777189157,-1.5172432101,-1.5463004675\C,0.3724219181,  
1.3837372885,-0.5546379638\C,-1.3755772851,-0.4219823829,-0.5130201805\H,-0.5241013633,-0.95902797  
68,1.8802266235\H,-0.5629096507,0.7998957712,1.9293719228\H,1.7813581031,-2.1513985925,1.98529329  
86\H,3.2423918326,-1.1594314477,2.0596635765\C,2.8258682556,-2.632827288,-0.3424245007\C,3.3299318  
493,-0.170123859,-0.4369371666\H,1.286135389,1.7828573715,-0.1224701063\H,-0.4496949892,2.05866894  
37,-0.3014469206\H,0.4453987465,1.3301368307,-1.6441785432\H,-1.5994778374,-1.4630614469,-0.265180  
209\H,-1.4499872445,-0.2862959642,-1.5925775415\H,-2.12467747,0.211908452,-0.0330108667\H,2.077617  
6869,-3.3977755335,-0.1177864159\H,3.7387088651,-2.8753919707,0.2065724004\H,3.0506281541,-2.65361  
73203,-1.4093228291\H,3.1375455833,0.8168365898,-0.0244479479\H,3.2919501632,-0.1557192869,-1.5294  
102923\H,4.3364194507,-0.4724348045,-0.1355377069\C,1.2562024773,-0.2107770247,3.7279657137\O,2.09  
0751556,1.1563630485,1.9524121192\O,0.6078159794,0.9702112253,4.1582799577\H,0.6691822577,-1.1056  
253241,3.9711042149\H,2.2568186052,-0.3016536157,4.1696561428\H,1.7734442519,1.811701496,2.594626  
5188\H,0.6157154263,1.0395664399,5.1194616668\Version=ES64L-G09RevE.01\State=1-A\HF=-672.96479  
75\RMSD=6.985e-09\RMSF=1.012e-05\Dipole=-0.0932204,-0.5588957,0.1618982\Quadrupole=-2.1678876,-4.9  
602659,7.1281535,-4.0510083,0.1385113,1.2480334\PG=C01 [X(C10H20N1O3)]\@

### Cation e.2

1\1\GINC-R195\FOpt\RM062X\6-31+G(d,p)\C10H20N1O3(1+)\ROOT\20-Jun-2017\0\#M062X\6-31+G\*\* S  
CF=Tight INT(grid=ultrafine) OPT IOP(2/17=4) maxdisk=1610612736\CationE.1iii.freq\1,1\C,0.6107295106,  
1.4195373554,0.0392124004\C,-0.7822969963,1.0699183093,-0.5038783586\C,-1.3297250631,-0.3083150455,-  
0.1089168219\C,-0.3422738192,-1.3888269986,-0.5344939031\C,1.0931516861,-1.2362941063,-0.005980734  
8\N,1.5311820973,0.2176987745,-0.1547372694\O,2.67479817,0.4273903879,-0.3804210111\C,0.6398122837,1  
.7244446185,1.5531599748\C,1.2203549159,2.5861886949,-0.7355158937\H,-0.7539807509,1.1376025446,-1.5  
986671103\H,-1.4698473997,1.847608313,-0.1560698862\H,-0.3088656063,-1.4214023014,-1.6305587669\H,  
-0.6983222263,-2.3642979272,-0.187184651\C,2.0655758051,-2.0880773607,-0.8192766713\C,1.2363481179,  
-1.5642694182,1.4971302298\H,0.1240445637,0.972211126,2.1439838638\H,0.1173831901,2.6766502371,1.6  
791783281\H,1.6698595133,1.8533944427,1.8961854855\H,1.3785463337,2.3334664076,-1.7874259096\H,2.  
163510136,2.9194007687,-0.3009715963\H,0.5068382699,3.411930292,-0.6863767227\H,2.1198858032,-1.75  
70008999,-1.8599157906\H,1.6857199497,-3.1122945275,-0.8053981699\H,3.068115197,-2.0874224769,-0.3  
901570922\H,0.4724446658,-1.0887550929,2.1067060123\H,2.2389354607,-1.3082281214,1.8498483693\H,1.1  
118967182,-2.6470666512,1.5825895741\C,-2.6772898886,-0.5380510894,-0.8008675695\O,-1.5242945681,-  
0.4053158722,1.2898351204\O,-3.549254872,0.4194829218,-0.2324575952\H,-2.5844290285,-0.4060617547,  
-1.8864214268\H,-3.0120897689,-1.5610993374,-0.5866905218\H,-2.3790781198,0.008503773,1.4915472416  
\H,-4.4635032802,0.2492180146,-0.485246127\Version=ES64L-G09RevE.01\State=1-A\HF=-672.9647976\R  
MSD=4.659e-09\RMSF=6.056e-06\Dipole=0.0597636,-0.1655936,-0.5627063\Quadrupole=6.3523579,0.46821  
91,-6.820577,0.4228083,3.3703052,1.7245898\PG=C01 [X(C10H20N1O3)]\@



### Cation e.3

1\1\GINC-R142\FOpt\RM062X\6-31+G(d,p)\C10H20N1O3(1+)\ROOT\19-Jun-2017\0\#M062X\6-31+G\*\* S  
CF=Tight INT(grid=ultrafine) OPT IOP(2/17=4) maxdisk=1610612736\CationE.1iv.freq\1,1\C,-0.0250996669,0  
.0221863147,0.017948932\C,0.0083377383,-0.0006457001,1.5518302795\C,1.3865602407,0.0069296442,2.20  
68766759\C,2.2209560488,-1.1523881389,1.6580313447\C,2.3674790369,-1.2230699004,0.1285135417\N,1.0  
077126584,-0.9658335062,-0.5157851868\O,0.7645861104,-1.5307119834,-1.5277142027\C,0.3448298036,1.  
3910617961,-0.5962678081\C,-1.3891895349,-0.4269150981,-0.5027516325\H,-0.5272518516,-0.8915136958,1  
.9011178116\H,-0.5593902129,0.8649423471,1.9041686564\H,1.779175275,-2.0940406787,2.0064674104\H,  
3.2388734863,-1.1172962474,2.0656447267\C,2.8231096878,-2.6140347052,-0.3081016926\C,3.3107775252,  
-0.1531636124,-0.4625219931\H,1.2369545229,1.825756158,-0.1533469631\H,-0.497113438,2.0535219182,-  
0.3785581608\H,0.442572454,1.3105926264,-1.6822025439\H,-1.6021051884,-1.4650856641,-0.2339498368\  
H,-1.4738961531,-0.3111102768,-1.5838727403\H,-2.139240498,0.2090828927,-0.0270773263\H,2.08326285  
45,-3.3782561868,-0.0554002165\H,3.7444170572,-2.8381126474,0.2347605184\H,3.0344737002,-2.6595670  
378,-1.3769306517\H,3.0775122802,0.8516533858,-0.1196117349\H,3.2988160259,-0.1970716081,-1.554749  
4621\H,4.3182213995,-0.4117355446,-0.1248594153\C,1.2192136672,-0.1404425304,3.727908126\O,1.98127  
51857,1.2711285721,1.9270734096\O,0.3451717238,0.8232631739,4.2468654517\H,0.7869513293,-1.116471  
8894,3.9680075042\H,2.2147617107,-0.0921035619,4.1986489975\H,2.816403953,1.3539679887,2.40845224  
54\H,0.7478965488,1.6985781743,4.1897517375\Version=ES64L-G09RevE.01\State=1-A\HF=-672.956775\  
RMSD=9.770e-09\RMSF=1.035e-05\Dipole=0.8901494,-0.3937473,-0.7687415\Quadrupole=3.3828342,-0.996  
2875,-2.3865467,-1.5536091,5.4389916,1.3658676\PG=C01 [X(C10H20N1O3)]\@

### Cation f

1\1\GINC-R1020\FOpt\RM062X\6-31+G(d,p)\C11H18N1O4(1+)\ROOT\28-Apr-2016\0\#M062X\6-31+G(d,p)  
INT(grid=ultrafine) OPT IOP(2/17=4) Freq=norman maxdisk=536870912\NitroxideF.2.freq\1,1\C,0.7603017  
407,3.1204906374,-1.0611790525\C,-0.7143443807,2.7270925298,-1.1419100746\C,1.6320382253,1.8822406  
154,-0.9453730608\C,1.2897541197,0.9296719686,0.2131765782\C,-1.2412224263,1.8644038453,0.01498914  
15\N,-0.2259473786,0.7589159949,0.3006116231\O,0.9817324556,3.9821730203,0.056996192\C,1.16571279  
77,4.0365975465,-2.2311857658\H,-0.8716066123,2.1873191636,-2.0838994007\H,-1.3383517112,3.6273765  
049,-1.1818294214\H,2.677436507,2.1780039924,-0.8105477323\H,1.5687970915,1.3313518348,-1.89233082  
82\C,1.7263692602,1.4664225517,1.595130791\C,1.8909856373,-0.4536070647,-0.0253960847\C,-2.5549581  
333,1.1865789069,-0.3693262222\C,-1.4140542088,2.6315903043,1.3449192948\O,-0.6391448099,-0.283963  
2868,0.67798729\H,1.4335752696,2.4997294469,1.7657634653\H,2.8185393025,1.4176095075,1.6085659571  
\H,1.3477397164,0.8205325324,2.3914248568\H,1.4616318846,-0.934127759,-0.9087622232\H,1.763415237  
3,-1.108255787,0.8372129935\H,2.9612708469,-0.3158108485,-0.1966076516\H,-2.424369808,0.4966590973,  
-1.2074572444\H,-3.246523231,1.9739799554,-0.6783095649\H,-2.998490545,0.6512947416,0.4707573614\H,-  
0.5422454988,3.2193620492,1.621172264\H,-1.6846655491,1.9408283942,2.1476064654\H,-2.2501869979,3.  
3195926033,1.1921454247\C,0.9520762935,5.2946973159,-0.3533522262\O,0.9212512113,6.2179734361,0.3  
857679527\O,0.9449413998,5.3380593495,-1.7010860284\H,0.5485551023,3.9121491077,-3.1219648658\H,2.2  
243071918,3.9256077923,-2.488310204\Version=ES64L-G09RevD.01\State=1-A\HF=-785.0607843\RMSD=  
7.162e-09\RMSF=1.566e-05\Dipole=-0.3914631,-3.0762654,-0.6152291\Quadrupole=8.2741426,-10.1848252,  
1.9106826,-3.4038423,-1.5949481,-4.4964881\PG=C01 [X(C11H18N1O4)]\@

### Cation g.1 CORE

1\1\GINC-R217\Freq\RM062X\6-31+G(d,p)\C10H20N1O4S1(1+)\ROOT\25-Aug-2017\0\#M062X\6-31+G\*\*  
SCF=Tight guess=read IOP(2/17=4) INT(Grid=Ultrafine) geom=check Freq=norman maxdisk=2147483648\  
CationG.1.a1b2.Methyl.freq\1,1\C,0.6846293655,-0.0421265,-0.1471449388\C,1.7485621576,-1.1263887501,  
0.003748351\C,1.1890922871,1.0479669872,-1.0772176156\C,2.4538301983,1.7497333163,-0.565379769\C,3.0  
582349702,-0.6127306415,0.6110023592\N,3.4517554868,0.6868326647,-0.0947402391\H,1.9350602549,-1.5  
733097889,-0.980307869\H,1.3977025115,-1.9320193353,0.6566428837\H,0.4235069258,1.819028266,-1.207  
0757014\H,1.3815723939,0.6091214818,-2.0633050794\C,2.1899542476,2.6484817363,0.6607256428\C,3.13  
07374632,2.5529996512,-1.671769457\C,4.1984427302,-1.6052835707,0.406504707\C,2.9193805274,-0.2589  
663643,2.1076579791\O,4.6040607448,0.9108242207,-0.2427263842\H,1.5821261509,2.1703772666,1.42773  
0278\H,1.6439118675,3.5202665706,0.291398471\H,3.1281665647,2.997593231,1.099675452\H,3.477925019  
8,1.9065739393,-2.4819111904\H,3.9690733653,3.1415105031,-1.2971402186\H,2.3823560518,3.237283497  
6,-2.0781100599\H,4.4237854584,-1.7443301047,-0.6540022197\H,3.8667058523,-2.563543307,0.812592585  
7\H,5.1054619548,-1.3019523002,0.9309990976\H,2.0194822722,0.3099346786,2.338067466\H,3.801649365  
8,0.2747417488,2.4704689522\H,2.8537504273,-1.2114844853,2.6395234924\H,0.3939676034,0.3644469696,  
0.8281034622\O,-0.4894421084,-0.567603275,-0.7726747293\S,-1.3245258736,-1.65667294,0.1407918129\O,  
-0.8096392847,-2.9739551745,-0.1640270941\O,-1.2840539233,-1.1629392742,1.5059334762\C,-2.92176040  
79,-1.4302616341,-0.5867494203\H,-2.8407300741,-1.6435088233,-1.6524106117\H,-3.2481478907,-0.40915

50162,-0.3954816101\H,-3.5790846561,-2.1515154443,-0.0981422612\\Version=ES64L-G09RevE.01\State=1-A\HF=-1146.2483429\RMSD=3.984e-09\RMSF=6.312e-06\ZeroPoint=0.3088097\Thermal=0.3264087\Dipole=1.6181314,2.0761658,-0.5505366\ PG=C01 [X(C10H20N1O4S1)]\@

### Cation g.2 CORE

1\1\GINC-R216\Freq\RM062X\6-31+G(d,p)\C10H20N1O4S1(1+)\ROOT\25-Aug-2017\0\#M062X\6-31+G\*\*  
SCF=Tight guess=read IOP(2/17=4) INT(Grid=Ultrafine) geom=check Freq=norman maxdisk=2147483648\  
CationG.1.Methyl.freq\1,1\C,-1.0259447729,0.1636797655,0.1420280865\C,-1.6847344494,1.3874480519,-0.4701532421\C,-1.5747998319,-1.1055776725,-0.4953629754\C,-3.0807099905,-1.2885175161,-0.2800268005\C,-3.2063642229,1.4207084127,-0.2721497388\N,-3.78112,0.0368400661,-0.5974795122\H,-1.4476015778,1.4171424483,-1.5403929585\H,-1.2795090211,2.2979767507,-0.0183695945\H,-1.0734818548,-1.9817475973,-0.0729373539\H,-1.3521725578,-1.0802384895,-1.5690776702\C,-3.4395498856,-1.6189057922,1.1842788073\C,-3.6589504803,-2.3448295998,-1.2159387343\C,-3.8703003261,2.421901838,-1.2122928052\C,-3.612510706,1.7100366282,1.18854835\O,-4.8602244383,-0.0095031401,-1.0804270543\H,-2.9339818273,-0.9850916608,1.9116000575\H,-3.1087367556,-2.6466635475,1.3538681333\H,-4.5201286399,-1.5762342337,1.3434858397\H,-3.5594450657,-2.0503325187,-2.2639148248\H,-4.7069562111,-2.5560458663,-0.9995729531\H,-3.0823427989,-3.2598079481,-1.0622371783\H,-3.736361311,2.1386905064,-2.2595411948\H,-3.38091026,3.3857399995,-1.0541308181\H,-4.9347019589,2.5369853625,-1.0041261396\H,-3.0512573208,1.1298301019,1.9200700831\H,-4.6840609585,1.552995205,1.3365596607\H,-3.3972985338,2.7672744472,1.3630358465\H,-1.1714840436,0.1593166258,1.2296912958\O,0.3759320239,0.2658212735,-0.132535122\N,1.3059960222,-0.3078842639,1.099784828\O,1.1268530474,0.5846378073,2.2256848136\O,0.989402257,-1.7167658661,1.2455421658\C,2.8871212436,-0.0768946669,0.3417764886\H,2.9255870612,-0.6803954373,-0.5641855239\H,3.6211532762,-0.4223115755,1.0718174244\H,3.0154448688,0.9850821017,0.1355603135\\Version=ES64L-G09RevE.01\State=1-A\HF=-1146.24814\RMSD=1.863e-09\RMSF=3.309e-06\ZeroPoint=0.308694\Thermal=0.32636\Dipole=-2.002986,0.5564826,-1.5086872\ PG=C01 [X(C10H20N1O4S1)]\@

### Cation g.1

1\1\GINC-R289\FOpt\RM062X\6-31+G(d,p)\C16H24N1O4S1(1+)\ROOT\10-Aug-2017\0\#M062X\6-31+G\*\*  
SCF=Tight INT(grid=ultrafine) OPT IOP(2/17=4) maxdisk=2684354560\CationG.1.a1b2.freq\1,1\C,1.3592998695,0.013747547,0.2000386889\C,2.0030519728,-0.785641445,-0.9259105726\C,1.8035424472,1.4657877319,0.1284799009\C,3.320912314,1.6509403959,0.258877102\C,3.5332313351,-0.8036641817,-0.8718036919\N,4.0274449005,0.6268734112,-0.6371925091\H,1.6667485718,-0.363423149,-1.880696113\H,1.6621421707,-1.824220745,-0.8825595975\H,1.3359269639,2.0430139065,0.9325606026\H,1.4564259531,1.8897828356,-0.821101449\C,3.8351622235,1.3800248248,1.6881662439\C,3.7565090184,3.0377114913,-0.2041376893\C,4.1388405448,-1.2851837718,-2.1861027945\C,4.0771211557,-1.6405889352,0.3052176628\O,5.047690118,0.9506848691,-1.1415008502\H,3.4274194059,0.4714481852,2.1298494013\H,3.508753817,2.2267823574,2.2971982102\H,4.9273880516,1.3443599391,1.7137271698\H,3.5517348023,3.1876068771,-1.2673054396\H,4.8142559611,3.2219741367,-0.0120820958\H,3.1697300716,3.7652282278,0.361438435\H,3.8967781388,-0.609320972,-3.0103499246\H,3.6968044177,-2.2599884874,-2.404222491\H,5.2214886348,-1.4020087129,-2.122123991\H,3.5667906465,-1.4462621808,1.2477209872\H,5.1537589956,-1.4968418789,0.4283679183\H,3.8981822487,-2.6860315309,0.0417162668\H,1.6003643179,-0.4198415879,1.1790421646\O,-0.0535746018,0.0192861919,0.0199245292\N,-0.8990370461,-1.1874136804,0.7619534696\O,-2.1626581104,-1.1863915951,0.0759850228\O,-0.0170782677,-2.3427190133,0.7920742538\C,-1.0779786448,-0.5571788724,2.4006903694\C,-0.2881135847,-1.0723937867,3.424852919\C,-0.4388353404,-0.5515380759,4.7080563512\C,-1.3648211998,0.4634626789,4.9708991752\C,-2.146526882,0.9555650961,3.9146464358\C,-2.0161094272,0.450404654,2.6282471294\C,-1.5563742745,0.9930013107,6.3665992568\H,0.400851055,-1.8867422018,3.2225637777\H,0.1586112856,-0.9534734666,5.5210999609\H,-2.8777457945,1.7345651404,4.1106053521\H,-2.6371268697,0.812246785,1.8144749286\H,-0.6987561785,0.7637188383,7.001917674\H,-2.4423183883,0.5400172793,6.8230828016\H,-1.7063767985,2.0752845592,6.3609442133\\Version=ES64L-G09RevE.01\State=1-A\HF=-1377.2162532\RMSD=4.714e-09\RMSF=3.740e-06\Dipole=4.1323916,1.8517876,-0.0991034\Quadrupole=3.3162219,-10.7081598,7.3919379,-5.0695334,-23.3786255,1.9014119\PG=C01 [X(C16H24N1O4S1)]\@

### Cation g.2

1\1\GINC-R227\Freq\RM062X\6-31+G(d,p)\C16H24N1O4S1(1+)\ROOT\21-Jun-2017\0\#M062X\6-31+G\*\*  
SCF=Tight guess=read IOP(2/17=4) INT(Grid=Ultrafine) geom=check Freq=norman maxdisk=2684354560\  
NitroxideG.1.a1.freq\1,1\C,1.0257732601,-0.0746962701,0.1887112413\C,1.7191038959,-0.7628535528,-0.9743998268\C,1.5569891536,1.3425844441,0.3545365109\C,3.0558513294,1.3973822534,0.6662188198\C,3.2385356335,-0.880475362,-0.7936586192\N,3.7871955723,0.4654895687,-0.3056638175\H,1.4942276202,-0.2107187213,-1.8947728843\H,1.327613618,-1.7773318357,-1.0967844223\H,1.0312868727,1.8401892831,1.1752117101\H,1.3460421364,1.9024566185,-0.5647781703\C,3.3906630494,0.8828975918,2.0821744712\C,3.62

34202664,2.7987517389,0.4665898928\C,3.9359085789,-1.2055576449,-2.1107031355\C,3.6328965516,-1.9095688302,0.2869024174\O,4.868754062,0.7813865512,-0.6672779754\H,2.8867691234,-0.0480312772,2.3382752328\H,3.0386692995,1.6510442289,2.7753424234\H,4.4697702305,0.7697134773,2.215061778\H,3.5424164872,3.1196097035,-0.5752280022\H,4.6641912247,2.8704270019,0.7851921933\H,3.0255988731,3.476576922,1.0800578158\H,3.8085349427,-0.4022141862,-2.8409348429\H,3.4649971908,-2.1069127641,-2.5097183247\H,4.9999813867,-1.4028385712,-1.9748166215\H,3.048322122,-1.8247060232,1.2021081175\H,4.698570293,-1.8447882502,0.5215863517\H,3.439315078,-2.8952411207,-0.1437105028\H,1.1579730403,-0.6594798443,1.1078844132\O,-0.366336461,-0.0218915506,-0.1305442468\S,-1.3314293856,-0.2467190172,1.1929807843\O,-1.1363070697,-1.6212890045,1.6101073079\O,-1.0157732783,0.8386779127,2.1064896091\C,-2.9009189824,-0.0215531835,0.4467229943\C,-3.453761516,1.2565119422,0.4155467265\C,-4.6968657713,1.4216187143,-0.1832278181\C,-5.3821547371,0.3335587613,-0.7388886565\C,-4.7942630067,-0.9374622156,-0.6847433986\C,-3.5532085796,-1.1294208383,-0.0912811949\C,-6.7451372417,0.5165554464,-1.3494862353\H,-2.9266260105,2.0920111446,0.8642973918\H,-5.1478678627,2.4089037703,-0.2133688341\H,-5.321564019,-1.7881268025,-1.1062735856\H,-3.1012696997,-2.1139101831,-0.028967653\H,-6.8871886431,1.5387765596,-1.7056795091\H,-7.5214076204,0.3108873198,-0.6051252974\H,-6.8987810076,-0.168383905,-2.1862346279\\Version=ES64L-G09RevE.01\State=1-A\HF=-1377.2187284\RMSD=3.492e-09\RMSF=8.793e-06\ZeroPoint=0.389714\Thermal=0.4124173\Dipole=3.5926529,0.4375473,-1.502409\PG=C01 [X(C16H24N1O4S1)]\@

### Cation h.1

1\1\GINC-R144\FOpt\RM062X\6-31+G(d,p)\C9H17N4O1(1+)\ROOT\28-Apr-2016\0\#M062X\6-31+G(d,p) I NT(grid=ultrafine) OPT IOP(2/17=4) Freq=norman maxdisk=402653184\NitroxideH.1.freq\1,1\C,0.6738755754,2.8702173567,-0.7784449591\C,-0.7782512891,2.4017198303,-0.8947541256\C,1.5908306068,1.6553050931,-0.7383956087\C,1.3226287613,0.6950032051,0.4259715368\C,-1.253268927,1.5081849797,0.2587347986\N,-0.1844159446,0.4439774352,0.5193975206\H,-0.8881162664,1.8661811865,-1.8454881194\H,-1.4633585841,3.2566688048,-0.9267591611\H,2.6345423897,1.9745650898,-0.6597857681\H,1.4924220219,1.1209403104,-1.6910735547\C,1.7383825716,1.2756996409,1.7939282219\C,1.9966603111,-0.6551244307,0.2014948563\C,-2.5460052293,0.7786509345,-0.0942335588\C,-1.4206211161,2.2758464432,1.5864285848\O,-0.5462156832,-0.6292902096,0.8614750231\H,1.4147458852,2.304669898,1.945058003\H,2.8310338095,1.2601652863,1.8136546688\H,1.3759378611,0.6509913127,2.6144986922\H,1.5931058741,-1.1635433778,-0.6779078307\H,1.9051339552,-1.3097314686,1.0691243903\H,3.0570478842,-0.4603745556,0.0253186631\H,-2.4050909163,0.0981930785,-0.9379354455\H,-3.2757327611,1.5373253232,-0.3864004561\H,-2.9480394645,0.2218029129,0.753184679\H,-0.586516162,2.9386711846,1.812904507\H,-1.5814956516,1.5887349321,2.4212499543\H,-2.318629905,2.8890336871,1.4756628155\N,1.075960785,3.6264954412,-1.9726807124\H,0.8121165986,3.488112474,0.1202185404\N,0.5898508081,4.7700402401,-2.0225635598\N,0.2032722015,5.8187879613,-2.161172596\\Version=ES64L-G09RevD.01\State=1-A\HF=-646.7876699\RMSD=5.684e-09\RMSF=1.726e-05\Dipole=-0.3352495,-1.2644943,1.3862127\Quadrupole=5.5020932,-2.4931667,-3.0089265,-2.8461873,1.6945435,0.4083144\PG=C01 [X(C9H17N4O1)]\@

### Cation h.2

1\1\GINC-R135\FOpt\RM062X\6-31+G(d,p)\C9H17N4O1(1+)\ROOT\19-Jun-2017\0\#M062X\6-31+G\*\* SC F=Tight INT(grid=ultrafine) OPT IOP(2/17=4) maxdisk=1610612736\CationH.1.ii.freq\1,1\C,1.2128804741,-0.4934068579,-0.0003536188\C,0.8527080437,0.9007506849,-0.5134335007\C,0.1621665744,-1.4981276462,-0.4727804042\C,-1.2640517254,-1.1902513154,0.0026943467\C,-0.5146527294,1.413091821,-0.04142342\N,-1.5471397224,0.2972530972,-0.2269623984\H,0.8714850219,0.8985649114,-1.6117883386\H,1.599272667,1.6283724428,-0.1797388204\H,0.4107601457,-2.5004087376,-0.1097677608\H,0.1693389339,-1.5406300176,-1.570451929\C,-1.4531884581,-1.4277404287,1.5154765068\C,-2.3028592236,-1.9792417396,-0.7884112973\C,-0.9822767894,2.608340931,-0.8661551332\C,-0.5349927917,1.761985568,1.4614216469\O,-2.6501922569,0.6098303973,-0.5189260583\H,-0.6469624609,-1.0192909352,2.1234041936\H,-1.4650262531,-2.5115030836,1.6565060307\H,-2.4117779543,-1.0310437115,1.8598336086\H,-2.2997025296,-1.7004304442,-1.8453733644\H,-3.308945707,-1.8519118526,-0.3867380464\H,-2.0318721683,-3.0348878034,-0.7131351527\H,-1.1373186571,2.3375853234,-1.9138039015\H,-0.1909729554,3.3602280194,-0.8215106501\H,-1.898488238,3.0478883969,-0.4697728382\H,-0.0637471704,1.0067418855,2.0890696193\H,-1.554665594,1.9464837804,1.8093752157\H,0.0322963822,2.6900581525,1.5683572614\N,2.5683469224,-0.8904631818,-0.4056898972\H,1.2709098086,-0.4916184952,1.090871238\N,2.7274041432,-0.9571023424,-1.6371097876\N,2.9825742683,-1.0490068186,-2.7316133501\\Version=ES64L-G09RevE.01\State=1-A\HF=-646.7858824\RMSD=9.833e-09\RMSF=6.222e-06\Dipole=-1.7383365,0.5151164,0.8700977\Quadrupole=-4.4179994,6.9261219,-2.5081225,3.5360269,-1.2704526,0.1887655\PG=C01 [X(C9H17N4O1)]\@

### Cation h.3

1\1\GINC-R163\FOpt\RM062X\6-31+G(d,p)\C9H17N4O1(1+)\ROOT\28-Apr-2016\0\#M062X/6-31+G(d,p) I NT(grid=ultrafine) OPT IOP(2/17=4) Freq=noramanmaxdisk=402653184\NitroxideH.2.freq\1,1\C,0.8169189 654,2.8543263919,-0.7678035592\C,-0.6630875098,2.4687518005,-0.8454721486\C,1.6788491961,1.6007851 548,-0.6794981022\C,1.3400545733,0.6166121001,0.4529705872\C,-1.1864153986,1.5593342681,0.27900216 34\N,-0.1748088397,0.4414237771,0.5214998823\H,-0.8326555768,1.9686615935,-1.8066715226\H,-1.29729 09469,3.3625920935,-0.8466456483\H,2.7287069226,1.88009143,-0.5507669272\H,1.599796,1.069205254,-1. 6346693202\C,1.7726661182,1.1024801538,1.8544994822\C,1.9426399613,-0.7584085628,0.1723409737\C,- 2.5042703898,0.9024584962,-0.1257748837\C,-1.3520288411,2.2727534465,1.6384734869\O,-0.5938446013, -0.6199144812,0.837628444\H,1.4923242533,2.1338141677,2.0537485766\H,2.8642443235,1.0434063433,1.8 695905688\H,1.384767993,0.433482059,2.6272982084\H,1.5171981391,-1.2106116493,-0.727607326\H,1.81 31552172,-1.4413223118,1.0126600648\H,3.0130377315,-0.6132326108,0.0086836326\H,-2.3793606241,0.24 71299925,-0.9919169041\H,-3.1939681037,1.7040249903,-0.4006313308\H,-2.9473111461,0.3341423657,0.6 926745657\H,-0.464511776,2.8225588994,1.9430843886\H,-1.6407833701,1.5556743058,2.4114349673\H,-2. 1723165591,2.9848920986,1.5125639475\N,1.1386374954,3.7344764349,0.3739159905\H,1.0770009762,3.36 35205639,-1.7047592119\N,0.7254654989,4.8983906793,0.2271683266\N,0.3857903179,5.9710107555,0.182 1686278\Version=ES64L-G09RevD.01\State=1-A\HF=-646.7909957\RMSD=5.819e-09\RMSF=1.030e-05\Di pole=-0.2566844,-1.197414,-0.3888902\Quadrupole=4.2707026,-2.9567685,-1.3139341,-3.0582848,-0.300239, -1.2623138\PG=C01 [X(C9H17N4O1)]\@

#### Cation h.4

1\1\GINC-R51\FOpt\RM062X\6-31+G(d,p)\C9H17N4O1(1+)\ROOT\01-Dec-2017\0\#M062X/6-31+G(d,p) S CF=Tight INT(grid=ultrafine) OPT IOP(2/17=4) maxdisk=12GB\CatH1.freq\1,1\C,0.2287428683,-1.2800856 908,-0.7218952769\C,1.3088006502,-0.520319673,0.0753348413\C,0.7591288554,0.7255725939,0.790342201 \C,-0.477198679,1.365552052,0.1603335512\N,-1.5354867009,0.2871621335,-0.0190366407\C,-1.189012244 9,-1.1863121361,-0.1547527976\C,-0.2248927521,1.9176972867,-1.2580995151\C,-1.0701234952,2.44658103 66,1.061801943\C,-2.2193809116,-1.819235743,-1.0869225593\C,-1.3169540039,-1.7579454467,1.274039903 1\O,-2.6734859095,0.6100495435,-0.0540598409\H,0.4820433056,-2.3449906781,-0.7581497284\H,0.215014 6017,-0.9427932392,-1.7632326515\H,1.5298206729,1.5001655745,0.8347602334\H,0.5397399423,0.462529 6564,1.8292628385\H,0.2191796539,1.1863528023,-1.9347826595\H,0.4769248344,2.7486624956,-1.149429 2776\H,-1.150059042,2.3029880024,-1.6931343862\H,-1.3791457147,2.03177661,2.0251717054\H,-1.919604 9315,2.9449332067,0.5937822886\H,-0.2904930765,3.1894435108,1.2440503213\H,-2.2279934077,-1.327462 4508,-2.063783268\H,-3.2228402603,-1.7911714262,-0.6610362926\H,-1.9358534418,-2.8640586672,-1.2314 021356\H,-0.5780967559,-1.3573797672,1.9681315169\H,-1.1406492352,-2.8338928263,1.1934541242\H,-2. 3278309627,-1.5989491954,1.6570839888\N,1.8873069913,-1.3446331591,1.1549082557\H,2.0965016895,-0. 2254608986,-0.6290380053\N,2.6996971957,-2.1948515864,0.7482405743\N,3.4448502644,-2.9941939208,0. 4766967487\Version=ES64L-G09RevD.01\State=1-A\HF=-646.7884733\RMSD=9.553e-09\RMSF=5.137e-06 \Dipole=-1.1195884,0.9764234,-0.7100811\Quadrupole=-2.2583314,5.6318056,-3.3734742,3.0110928,-0.9573 54,0.5962079\PG=C01 [X(C9H17N4O1)]\@

#### Cation i

1\1\GINC-R86\FOpt\RM062X\Gen\C9H17Br1N1O1(1+)\ROOT\05-Dec-2016\0\#M062X/gen 6D SCF=Tight INT(grid=ultrafine) OPT IOP(2/17=4) maxdisk=2684354560\CatJ.New.1.freq\1,1\C,0.1079760128,-1.351800 8824,1.3946857034\C,-0.1890766683,-1.2461847942,-0.1114670482\C,0.393489014,0,-0.7608496351\C,-0.18 90766683,1.2461847942,-0.1114670482\C,0.1079760128,1.3518008824,1.3946857034\N,-0.1895510945,0,-2.0 451522092\O,-0.640473739,0,3.1392689431\C,1.5904908554,-1.6545129725,1.6942649839\C,-0.7876643322,- 2.3890163444,2.064430211\H,-1.274148681,-1.2571673489,-0.2691654413\H,0.2115042942,-2.1523067248,- 0.5756078035\H,-1.274148681,1.2571673489,-0.2691654413\H,0.2115042942,2.1523067248,-0.5756078035\ C,-0.7876643322,2.3890163444,2.064430211\C,1.5904908554,1.6545129725,1.6942649839\H,2.2840154388,- 1.0487562881,1.1126579712\H,1.7501657637,-2.7015703225,1.4245604236\H,1.8084669918,-1.5426841375, 2.7596059213\H,-1.8421321676,-2.1071811006,2.006702777\H,-0.5163585845,-2.5522182838,3.1083274188\ H,-0.6554341678,-3.3282164104,1.5223526709\H,-1.8421321676,2.1071811006,2.006702777\H,-0.655434167 8,3.3282164104,1.5223526709\H,-0.5163585845,2.5522182838,3.1083274188\H,2.2840154388,1.0487562881, 1.1126579712\H,1.8084669918,1.5426841375,2.7596059213\H,1.7501657637,2.7015703225,1.4245604236\Br,- 0.0425240414,0,-2.6564491145\H,1.4845603483,0,-0.7286779799\Version=ES64L-G09RevE.01\State=1-A\ HF=-3056.5498603\RMSD=7.903e-09\RMSF=5.275e-06\Dipole=0.4064171,0,2.5050966\Quadrupole=-3.6707 733,5.504596,-1.8338227,0,1.1501882,0\PG=CS [SG(C1H1Br1N1O1),X(C8H16)]\@

#### Cation k.1

1\1\GINC-R424\Freq\RM062X\6-31+G(d,p)\C12H20N1O2(1+)\ROOT\28-Apr-2016\0\#N Geom=AllCheck G uess=TCheck SCRF=Check Test GenChk RM062X/6-31+G(d,p) Freq\NitroxideK.2.freq\1,1\C,0.4323795726,

2.6182104066,-0.9071150798\C,-0.9752807662,2.0406717002,-0.9711010762\C,1.4421280701,1.4936066289,-0.6654759499\C,1.1968519551,0.6479265511,0.594766096\C,-1.4198999742,1.2348283238,0.2610768482\N,-0.2877056549,0.3025122742,0.6813992461\H,-1.0495998964,1.399176755,-1.856735157\H,-1.6986439482,2.8520850795,-1.0937291661\H,2.4591080886,1.8887886947,-0.5762517854\H,1.4431523618,0.8352184807,-1.5423263066\C,1.5338093591,1.3853562913,1.9102342569\C,1.9649547172,-0.6704361432,0.5257169544\C,-2.6281716492,0.3607586707,-0.0688867096\C,-1.7235360758,2.1052984968,1.5016943564\O,-0.581929672,-0.7405757249,1.1591047421\H,1.092480269,2.3779453922,1.9673864171\H,2.6220511422,1.4933259135,1.9274646035\H,1.2399819553,0.7801807235,2.7720304828\H,1.6214168704,-1.2948685898,-0.3034544196\H,1.8921840835,-1.2363827939,1.455027507\H,3.0153020524,-0.4233797415,0.3547375627\H,-2.3878910307,-0.3919474477,-0.8246851527\H,-3.3994633217,1.0190488964,-0.4754978197\H,-3.0300817064,-0.1342194041,0.8157449151\H,-0.9422911636,2.8311046999,1.7132771019\H,-1.9192850285,1.4712794259,2.3705446029\H,-2.6390553813,2.6548401328,1.2668981166\O,0.4550173829,3.5985758866,0.1085742685\H,0.6550934119,3.079946841,-1.8801983109\C,1.5016077684,4.5591629628,-0.0127763375\C,1.6141340062,5.2824052502,1.2517101486\C,1.7190239104,5.8807511136,2.2923259531\H,1.2738089187,5.2512860298,-0.8335270241\H,2.4580532847,4.0674572706,-0.2371994767\H,1.8121360887,6.425340953,3.2073555916\Version=ES64L-G09RevD.01\State=1-A\HF=-673.8608339\RMSD=3.779e-10\RMSF=3.563e-06\ZeroPoint=0.3083522\Thermal=0.3245144\Dipole=-0.1135996,-1.0258872,-0.5012205\PG=C01 [X(C12H20N1O2)]\@

### Cation k.2

1\GINC-R99\Freq\RM062X\6-31+G(d,p)\C12H20N1O2(1+)\ROOT\19-Jun-2017\0\#M062X\6-31+G\*\* SCF=Tight guess=read IOP(2/17=4) INT(Grid=Ultrafine) geom=check Freq=norman maxdisk=1610612736\NitroxideK.3.freq\1,1\C,-0.8477019938,-0.7582589275,0.1225350519\C,0.1415806349,-1.4070471685,-0.8431598143\C,-0.7514709429,0.7576582105,-0.0000762237\C,0.6388194404,1.3332798964,0.2991878779\C,1.6060692923,-1.0293584181,-0.5995173422\N,1.6904773003,0.4891414632,-0.4263016534\H,-0.1514838049,-1.1270094888,-1.8622986757\H,0.0717500517,-2.496627613,-0.7732712064\H,-1.4530166974,1.23790317,0.689379784\H,-1.0583039573,1.0365574525,-1.0152613267\C,1.0064349981,1.2626822249,1.7961982764\C,0.7749612109,2.7654828784,-0.2081508946\C,2.4919746382,-1.4009858854,-1.78423405\C,2.1704320389,-1.6408046547,0.7000245278\O,2.6506108107,1.0424140178,-0.841821792\H,0.7839414685,0.2984765823,2.2514939015\H,0.3991012516,2.0208351167,2.2970306342\H,2.0587155996,1.5117127279,1.9565545017\H,0.6844793759,2.8150512595,-1.2962860463\H,1.7177528392,3.2224847479,0.0954140953\H,-0.0450338841,3.3405692895,0.2280270583\H,2.2087672735,-0.8501161871,-2.6848104194\H,2.3419642889,-2.4658739119,-1.9754803389\H,3.5496058946,-1.2316948053,-1.5771289914\H,1.4942349352,-1.5524224428,1.5492805486\H,3.1427086152,-1.2092310207,0.9522154312\H,2.3126936279,-2.7053264443,0.497517343\O,-2.1570697496,-1.1272904076,-0.2466405546\H,-0.6477064922,-1.0773277874,1.155833704\C,-2.785448307,-2.0739441576,0.6076418967\C,-2.0255069491,-3.324744065,0.7564550338\C,-1.4092569406,-4.3513661986,0.9071737488\H,-3.7574392901,-2.2780819057,0.1549307148\H,-2.9540539663,-1.63303841,1.5995687611\H,-0.8969926111,-5.2805691375,1.0373664388\Version=ES64L-G09RevE.01\State=1-A\HF=-673.8589033\RMSD=2.109e-09\RMSF=4.848e-06\ZeroPoint=0.3080633\Thermal=0.3243417\Dipole=1.2540033,0.7003785,0.4010355\PG=C01 [X(C12H20N1O2)]\@

### Cation k.3

1\GINC-R105\FOpt\RM062X\6-31+G(d,p)\C12H20N1O2(1+)\ROOT\19-Jun-2017\0\#M062X\6-31+G\*\* SCF=Tight INT(grid=ultrafine) OPT IOP(2/17=4) maxdisk=1610612736\NitroxideK.3i.freq\1,1\C,-0.6620434225,-0.8126116559,0.6197969166\C,0.2858853963,-1.598760634,-0.2862669083\C,-0.7434239139,0.6269791934,0.1363708751\C,0.5957209377,1.3709271051,0.1508519208\C,1.7174506654,-1.0507930866,-0.309112641\N,1.6613697537,0.4702522563,-0.4795569668\H,-0.1274635312,-1.607537489,-1.3027667164\H,0.3701114001,-2.6397068763,0.044795899\H,-1.4354306653,1.1900313944,0.7701424537\H,-1.160050872,0.6308720931,-0.8780145715\C,1.0992499053,1.6797394133,1.5764143099\C,0.5365778286,2.6522589041,-0.6750374858\C,2.5182165895,-1.6086395306,-1.4818602503\C,2.468775956,-1.2996506875,1.0161007759\O,2.5260187738,0.9879884667,-1.0997733856\H,1.0246212431,0.8309806862,2.2547965269\H,0.4572762946,2.476014275,1.9615337133\H,2.1273131351,2.0510506148,1.5590767056\H,0.3461982432,2.440300178,-1.7303047034\H,1.4494703918,3.242488597,-0.5856774106\H,-0.2976099364,3.2436995616,-0.2908391373\H,2.091894903,-1.3019073256,-2.4405050928\H,2.4658890707,-2.6978542947,-1.4181089613\H,3.5668146903,-1.310541243,-1.443241472\H,1.8722068955,-1.0740149181,1.899163222\H,3.4084448883,-0.7419182455,1.0482079617\H,2.7055034882,-2.366473801,1.0368613501\O,-1.978377635,-1.30196085,0.5569405735\H,-0.3109494464,-0.8548647955,1.6607588492\C,-2.1717450437,-2.6392291977,1.00568212\C,-1.5198801066,-2.9276640668,2.2909036346\C,-0.9730764898,-3.1808136723,3.3364242592\H,-1.8206343542,-3.352781976,0.2487957639\H,-3.2527685205,-2.7586561276,1.099346438\H,-0.5255865125,-3.4200222652,4.2773914341\Version=ES64L-G09RevE.01\State=1-A\HF=-673.8594813\RMSD=9.872e-09\RMSF=2.021e-05\Dipole=1.3342669,0.5932406,-0.25

30716\Quadrupole=-3.8329246,5.5495156,-1.716591,0.8022228,-0.7708697,-1.7129015\PG=C01 [X(C12H20N1O2)]\@

#### Cation k.4

1\1\GINC-R51\FOpt\RM062X\6-31+G(d,p)\C12H20N1O2(1+)\ROOT\03-Dec-2017\0\#M062X\6-31+G(d,p)  
SCF=Tight INT(grid=ultrafine) OPT IOP(2/17=4) maxdisk=12GB\CatK5.freq\1,1\C,0.2565263066,-1.064650  
4637,-1.0867239068\C,1.2983858866,0.0341314248,-0.8308518975\C,0.7220056985,1.2237752603,-0.039386  
3678\C,-0.7999307779,1.3795214905,-0.0320723977\N,-1.4411370132,0.0375691507,0.2954070141\C,-0.735  
0303539,-1.282432004,0.0552526783\C,-1.3773590058,1.7702688162,-1.4088398396\C,-1.252061659,2.3724  
43307,1.0382151797\C,-1.7909490298,-2.3260829156,-0.2949390841\C,-0.0591113348,-1.6137339454,1.4042  
25789\O,-2.5340025966,0.0314179339,0.7507193318\H,0.7633649928,-2.0194938238,-1.2508285048\H,-0.29  
83129385,-0.8559063723,-2.0071494333\H,1.1283803105,2.1654488967,-0.4188591361\H,1.0802967066,1.13  
4126147,0.9902223415\H,-1.0430378707,1.1184601621,-2.2169231559\H,-1.0214627392,2.7818383279,-1.62  
02061846\H,-2.4694175985,1.7890422547,-1.3807811038\H,-0.9785032935,2.025471456,2.0384477589\H,-2.  
3271282658,2.5507595307,0.998625398\H,-0.7364559401,3.3170982439,0.8518397588\H,-2.3479177903,-2.0  
434518804,-1.1928280957\H,-2.4896281684,-2.4909235922,0.525868207\H,-1.2669370595,-3.2632540238,-0.  
496199788\H,0.6607292312,-0.859922244,1.7228826248\H,0.498171436,-2.5420667194,1.2510455873\H,-0.8  
181828285,-1.7676836964,2.1748190113\O,2.3871283408,-0.4082043507,-0.0423199765\H,1.6766742689,0.3  
718742991,-1.8060578847\C,2.9603409315,-2.7139433999,-0.4897808013\C,2.7170120851,-3.8870509016,-0.  
3445325454\H,2.5317489424,-4.9320579603,-0.2150937762\C,3.3051175543,-1.2936339938,-0.6689072055\  
H,4.2742241566,-1.1040450947,-0.2011069128\H,3.3955794157,-1.0607793197,-1.7383226825\Version=ES6  
4L-G09RevD.01\State=1-A\HF=-673.8600437\RMSD=7.977e-09\RMSE=4.699e-06\Dipole=-1.0339323,0.623  
0916,-0.4047642\Quadrupole=-1.4119025,8.2475917,-6.8356892,-4.0520609,-2.2066502,-1.0653384\PG=C01  
[X(C12H20N1O2)]\@

#### Cation k.5

1\1\GINC-R51\FOpt\RM062X\6-31+G(d,p)\C12H20N1O2(1+)\ROOT\03-Dec-2017\0\#M062X\6-31+G(d,p)  
SCF=Tight INT(grid=ultrafine) OPT IOP(2/17=4) maxdisk=12GB\CatK3.freq\1,1\C,-0.6773280693,0.993645  
0484,0.0029483343\C,-1.0730295018,-0.2565705366,0.8039385489\C,0.0874034477,-1.2521811982,0.982598  
71\C,1.1149119743,-1.2635071168,-0.1506490036\N,1.621633968,0.1568955111,-0.3369209686\C,0.8001876  
111,1.3776372269,0.0481481926\C,0.5033808533,-1.648376949,-1.5154865761\C,2.319818386,-2.143442543  
1,0.1725757985\C,1.1285010103,2.4873184694,-0.9481004637\C,1.2878657704,1.7531788479,1.4630861666\  
O,2.6989346957,0.3209716542,-0.7994558561\H,-1.2445519581,1.8578484262,0.3603273893\H,-0.98276272  
15,0.8426844047,-1.0367151578\H,-0.3232941196,-2.2655335783,1.0379676745\H,0.60584205,-1.085327371  
7,1.9321772801\H,-0.3894849829,-1.0747030998,-1.7627552374\H,0.2063746003,-2.6972333357,-1.4335759  
782\H,1.2505163429,-1.5590847604,-2.3077958339\H,2.8423179963,-1.7895860496,1.0658734576\H,3.02284  
6001,-2.1929597754,-0.6596242324\H,1.9477331398,-3.1510678575,0.370253316\H,0.911921605,2.17389659  
12,-1.9730303966\H,2.1703378122,2.8018568739,-0.8789930015\H,0.4917677738,3.3423583017,-0.71085725  
03\H,1.0586776604,0.9953000153,2.2134922352\H,0.764382144,2.6720323199,1.739580493\H,2.3617607727,1  
.9543705735,1.4617943766\O,-2.1394728329,-0.8335114325,0.0750260536\H,-1.4296196128,0.0387163639,1.7  
990514816\C,-3.7652188365,-0.7374303518,1.8450372377\C,-4.3289355069,-0.0569975923,2.6658592039\H,  
-4.8500097948,0.5368360884,3.3858718786\C,-3.0727591947,-1.5725584976,0.8551407857\H,-2.5810213317,-  
2.413881381,1.3636902718\H,-3.7883671519,-1.9841832893,0.1410410698\Version=ES64L-G09RevD.01\St  
ate=1-A\HF=-673.8596984\RMSD=7.910e-09\RMSE=1.004e-05\Dipole=1.3409147,0.2513542,0.0763792\Qua  
drupole=0.5162517,3.8876934,-4.4039451,0.5892241,-5.3388129,2.0977984\PG=C01 [X(C12H20N1O2)]\@

**Cation l.1** 1\1\GINC-R136\FOpt\RM062X\6-31+G(d,p)\C12H20N1O3(1+)\ROOT\20-Jul-2017\0\#M062X\6-3  
1+G\*\* SCF=Tight INT(grid=ultrafine) OPT IOP(2/17=4) maxdisk=2147483648\CatL.1iii.freq\1,1\C,-0.50185  
61153,-0.0172980785,0.8969292446\C,-0.044040377,-1.2579830851,0.1492242114\C,-0.0612057822,1.23165  
40366,0.1409087858\C,1.4594372489,1.3570635777,0.0032816489\C,1.4797341595,-1.3530298044,-0.001221  
7733\N,2.0191786368,0.0075733524,-0.4563426212\H,-0.5151411657,-1.269810804,-0.8408494216\H,-0.371  
9578448,-2.1607341442,0.673945029\H,-0.4078775432,2.1273042685,0.6642945082\H,-0.5247468542,1.2205  
718818,-0.85326165\C,2.1549816438,1.6710976305,1.344810486\C,1.8480644057,2.3919267981,-1.04775414  
6\C,1.8747368729,-2.3766824774,-1.0611920178\C,2.1964140668,-1.6612805585,1.3301722579\O,2.9613956  
336,0.0138016661,-1.1721137117\H,1.7952831935,1.0625183366,2.1732421411\H,1.9182851884,2.71327216  
96,1.5732615862\H,3.240601467,1.5780004869,1.2570386567\H,1.5019876693,2.1022381813,-2.0433465692\  
H,2.9248358853,2.5636547175,-1.0771197227\H,1.3556499347,3.3278032341,-0.7741876044\H,1.517278564  
8,-2.0857216207,-2.0523401146\H,1.3973687752,-3.3212675307,-0.7904403034\H,2.9533948679,-2.5333189  
806,-1.0996966244\H,1.843938057,-1.0543222304,2.1631312979\H,3.2792853806,-1.552901977,1.227619495  
8\H,1.980856574,-2.7078484015,1.5598778199\O,-1.9204876248,-0.0805020025,0.9491631567\H,-0.1225816

958,0.0014928457,1.9240982126\C,-2.5049031041,0.7224626969,1.8878962436\O,-1.8502447883,1.4491182136,2.5973736874\C,-3.9730368269,0.5649095195,1.8902293403\C,-4.708113956,1.2712888544,2.749013201\H,-4.3986117094,-0.1358650012,1.1806186969\H,-4.2334580588,1.9596539194,3.4423592913\H,-5.787674779,1.1754303097,2.7775372808\Version=ES64L-G09RevE.01\State=1-A\HF=-749.1355991\RMSD=4.546e-09\RMSF=6.149e-06\Dipole=1.5477218,-0.6276759,-0.9284169\Quadrupole=10.6943642,-1.0835901,-9.610774,-2.7545236,-5.881555,-0.0879059\PG=C01 [X(C12H20N1O3)]\@

### Cation I.2

1\1\GINC-R119\FOpt\RM062X\6-31+G(d,p)\C12H20N1O3(1+)\ROOT\20-Jul-2017\0\#M062X/6-31+G\*\* SC F=Tight INT(grid=ultrafine) OPT IOP(2/17=4) maxdisk=2147483648\CatL.iv.freq\1,1\C,-0.4879620677,-0.0455493626,0.8998917578\C,-0.0226405303,-1.279239624,0.1453415108\C,-0.0627092931,1.2096693811,0.1453883167\C,1.456164046,1.3503853895,0.0037100352\C,1.5018019157,-1.359437769,-0.0102268569\N,2.0269301829,0.0077473779,-0.4625182585\H,-0.4959218731,-1.2914450386,-0.8437291555\H,-0.3400673394,-2.1869733393,0.6679566923\H,-0.4159525605,2.1008271279,0.6719987749\H,-0.5291939445,1.1968078912,-0.8473773149\C,2.152271504,1.6667043124,1.3444783494\C,1.8319324453,2.3924011597,-1.0448947076\C,1.902657754,-2.3758604293,-1.0749689632\C,2.2260427836,-1.6654082053,1.3175222495\O,2.9664455007,0.0250534309,-1.1816510477\H,1.7983397451,1.0543701513,2.1726592722\H,1.9086228357,2.7067518755,1.5754147051\H,3.2383601482,1.581522179,1.2544097892\H,1.4855246016,2.1030665991,-2.0404799715\H,2.9070079818,2.574054779,-1.0768030021\H,1.331853118,3.3227270049,-0.7663388846\H,1.538503298,-2.0855248738,-2.0638708657\H,1.436051178,-3.3260853933,-0.8051720746\H,2.9826458617,-2.5215963688,-1.1182338258\H,1.8742817452,-1.0617997969,2.15318064\H,3.3077159974,-1.5502640182,1.2098702808\H,2.0179613568,-2.7136392446,1.546576587\O,-1.9055686552,-0.1209943694,0.9629710753\H,-0.1002692635,-0.0279012515,1.9237546539\C,-2.4840221421,0.6780122539,1.9090718423\O,-1.8228307375,1.4049460551,2.6122034061\C,-3.9539329586,0.5562157689,1.9685932709\C,-4.6603609045,-0.2522682725,1.1785190739\H,-4.4130965802,1.1893107804,2.7199694347\H,-4.1810233859,-0.8782939043,0.4331305946\H,-5.7403117631,-0.3045822561,1.2628226159\Version=ES64L-G09RevE.01\State=1-A\HF=-749.134205\RMSD=4.025e-09\RMSF=9.621e-06\Dipole=1.5760963,-0.7465756,-1.0966678\Quadrupole=11.4634318,-0.6245939,-10.8388379,0.7597343,-2.1390777,-1.5460794\PG=C01 [X(C12H20N1O3)]\@

### Cation I.3

1\1\GINC-R376\FOpt\RM062X\6-31+G(d,p)\C12H20N1O3(1+)\ROOT\28-Apr-2016\0\#M062X/6-31+G(d,p) INT(grid=ultrafine) OPT IOP(2/17=4) Freq=noraman maxdisk=536870912\NitroxideL.2i.freq\1,1\C,0.7094063469,2.5781650325,-0.7193739094\C,-0.7642971354,2.1991464716,-0.8239504578\C,1.5756533597,1.3365913819,-0.5826236639\C,1.2039388519,0.3706682368,0.5559763276\C,-1.3139354298,1.3208675765,0.3098870117\N,-0.3140222139,0.2015882792,0.592317879\H,-0.9050865941,1.6734541052,-1.7759882453\H,-1.3797207477,3.1019734317,-0.8685841525\H,2.6198328803,1.6238985407,-0.4261557505\H,1.5305767415,0.7908637574,-1.5320628065\C,1.6035636586,0.8841008982,1.9565537076\C,1.8086829688,-1.010798012,0.3172816068\C,-2.6305654442,0.664473002,-0.097126067\C,-1.4943666206,2.0729015382,1.6464054707\O,-0.7424541717,-0.8561256658,0.9083861981\H,1.3207055825,1.9201082148,2.1244902831\H,2.6939098851,0.8195944609,2.0024986264\H,1.1915821358,0.2375167186,2.7359147353\H,1.4039241091,-1.4781474641,-0.5843916451\H,1.6560888307,-1.6781269522,1.1662800154\H,2.8832155993,-0.8718388787,0.1767513509\H,-2.4980033789,-0.0126055015,-0.9451459185\H,-3.3078485074,1.4653156132,-0.4027279037\H,-3.0908623465,0.1196175341,0.7279574331\H,-0.6122167983,2.6340135225,1.9451953775\H,-1.7917793009,1.3811263868,2.4390094465\H,-2.3114604135,2.7818794831,1.4872889376\O,0.9806212345,3.4360220716,0.3935138896\H,0.9844765403,3.1095068476,-1.6353890537\C,0.6006957358,4.7423204293,0.2401885669\O,0.0274050223,5.1260523059,-0.7484826137\C,0.9733835114,5.5502074422,1.420251639\C,0.6490778637,6.8427782836,1.4614280732\H,1.5157833861,5.0529133893,2.2175859601\H,0.1147605372,7.3007160174,0.6338457549\H,0.9132643213,7.4637615012,2.3100338969\Version=ES64L-G09RevD.01\State=1-A\HF=-749.1367095\RMSD=9.218e-09\RMSF=6.133e-06\Dipole=0.0349404,-1.6156026,0.531713\Quadrupole=-0.1612192,6.5636371,-6.4024179,-0.2730402,0.9086749,7.0540553\PG=C01 [X(C12H20N1O3)]\@

### Cation I.4

1\1\GINC-R374\FOpt\RM062X\6-31+G(d,p)\C12H20N1O3(1+)\ROOT\28-Apr-2016\0\#M062X/6-31+G(d,p) INT(grid=ultrafine) OPT IOP(2/17=4) Freq=noraman maxdisk=536870912\NitroxideL.2ii.freq\1,1\C,0.5986418156,2.6131407932,-0.6641556618\C,-0.8396415871,2.1399150377,-0.851537259\C,1.5341861521,1.4262753839,-0.5012077066\C,1.166918031,0.4174406791,0.601544761\C,-1.3897218126,1.2128041844,0.2419008427\N,-0.3370715745,0.1525434827,0.5581902743\H,-0.892341664,1.6183318517,-1.8148106646\H,-1.5117870057,2.9991985765,-0.9218936807\H,2.5489855405,1.7749324654,-0.2867815421\H,1.5720054386,0.896368559,-1.4598249826\C,1.458569448,0.9277139807,2.0290452796\C,1.871368395,-0.9176348495,0.3729401275\C,-2.6410249753,0.482801493,-0.2391859634\C,-1.6837529113,1.9334691799,1.5757806813\O,-0.712215984

7,-0.9358182466,0.8351901751\H,1.0750669175,1.9293951141,2.2060147203\H,2.5472703433,0.9569646647,2.1249217026\H,1.0694378579,0.228951864,2.7743373662\H,1.5459616405,-1.3908950907,-0.5573127291\H,1.7170067185,-1.6108097783,1.2005762425\H,2.9407427252,-0.7083618785,0.2932169792\H,-2.4245052437,-0.1721090832,-1.0873387406\H,-3.350854203,1.2448125891,-0.5691097963\H,-3.1069942324,-0.1017188293,0.5550324953\H,-0.8598112434,2.5539947634,1.9208473114\H,-1.9672192363,1.2131068205,2.3478066476\H,-2.5418639719,2.5837363093,1.384666606\O,0.7622359794,3.4647774928,0.4750060976\H,0.8848052634,3.1767353597,-1.5572659545\C,0.2762837407,4.7353908846,0.3349357549\O,-0.3089446343,5.0865685903,-0.6588713267\C,0.5272516987,5.5941778775,1.5121523492\C,1.2818757407,5.2306065605,2.5491178539\H,0.057296964,6.5696979361,1.4473805265\H,1.7700196818,4.2615984544,2.5851831822\H,1.4458401879,5.9054468078,3.3820380313\Version=ES64L-G09RevD.01\State=1-A\HF=-749.1352228\RMSD=3.855e-09\RMSF=8.011e-06\Dipole=0.2307852,-1.7897624,0.5283003\Quadrupole=2.1285672,1.2250615,-3.3536287,0.7750145,1.6743739,8.0165999\PG=C01 [X(C12H20N1O3)]\@\

### Cation I.5

1\1\GINC-R166\FOpt\UM062X\6-31+G(d,p)\C12H20N1O3(2)\ROOT\01-Dec-2017\0\#M062X\6-31+G(d,p) SCF=Tight INT(grid=ultrafine) OPT IOP(2/17=4) maxdisk=12GB\RadL1.freq\0,2\C,-0.1106290447,0.6112446313,1.0451305375\C,0.6115067558,-0.4740402528,0.2381560476\C,-0.3023979531,-1.2027336905,-0.7478426815\C,-1.7653177524,-1.2923208639,-0.3016141415\N,-2.2548033771,0.0792178024,-0.0125764576\C,-1.358705883,1.1986825268,0.3770437998\C,-1.9382240476,-2.1650486601,0.9509006345\C,-2.6027729011,-1.86728875,-1.4449752791\C,-2.1028717286,2.0738835049,1.3866227499\C,-1.0139622071,2.0308989157,-0.8675917359\O,-3.5054516718,0.3022942197,-0.096227009\H,0.5922609847,1.4197199877,1.268245621\H,-0.4024954345,0.1896021948,2.0131104803\H,0.073952455,-2.2147082271,-0.9295055962\H,-0.2633291798,-0.6756842457,-1.7064978676\H,-1.3101506533,-1.8279071145,1.7801459842\H,-1.6756319237,-3.2030514798,0.7225280538\H,-2.9824456529,-2.1308804734,1.2731607667\H,-2.5568337722,-1.2119013164,-2.3194765553\H,-3.6468240412,-1.9640313319,-1.1454258156\H,-2.2129951691,-2.8523737093,-1.7185310812\H,-2.4414441062,1.4756974765,2.2374258695\H,-2.9765645802,2.536747797,0.9263884671\H,-1.4288583279,2.8560595885,1.7486110855\H,-0.4004423209,1.4748215111,-1.5800668478\H,-0.4563911638,2.9251804911,-0.5705881876\H,-1.9388201652,2.3423697422,-1.3611528734\O,1.6651911197,0.0950797045,-0.5693097311\H,1.08280061,-1.172716795,0.934580579\C,2.8039483481,0.4177064611,0.0708121214\O,2.9731291348,0.2599799764,1.2588023301\C,3.803707811,0.985259343,-0.8721616817\C,4.9974909872,1.3682932256,-0.4240594116\H,3.5096831348,1.0648656265,-1.9134696728\H,5.2405982753,1.265883571,0.6296945707\H,5.745453441,1.7846186126,-1.089807072\Version=ES64L-G09RevD.01\State=2-A\HF=-749.3911219\S2=0.755238\S2-1=0.\S2A=0.750018\RMSD=4.667e-09\RMSF=6.793e-06\Dipole=1.0490068,-0.1320037,-0.4997303\Quadrupole=-5.4155795,5.0012405,0.4143391,4.7020335,-5.5341644,-0.2057908\PG=C01 [X(C12H20N1O3)]\@\

### Cation I.6

1\1\GINC-R170\FOpt\UM062X\6-31+G(d,p)\C12H20N1O3(2)\ROOT\01-Dec-2017\0\#M062X\6-31+G(d,p) SCF=Tight INT(grid=ultrafine) OPT IOP(2/17=4) maxdisk=12GB\RadL4.freq\0,2\C,-0.35234564,-0.8822953034,-0.5519071225\C,0.7005537199,-0.3295525292,0.4070936696\C,1.2463942233,-1.3820776586,1.3807939454\C,0.2623013044,-2.5095954547,1.7111598248\N,-0.2207213419,-3.1129981626,0.443046145\C,-0.2424439934,-2.3821359504,-0.8500858663\C,-0.9426868278,-2.0057876964,2.5204318682\C,0.9932310553,-3.5926878006,2.5064299794\C,-1.4787600608,-2.8300278193,-1.6306832549\C,1.0232152389,-2.7270051425,-1.6490078799\O,-0.6445015623,-4.3133352392,0.4688389833\H,-0.2945211698,-0.3259200616,-1.4931173984\H,-1.3459636794,-0.6913550629,-0.1325073599\H,1.5612951778,-0.8981867296,2.3093720579\H,2.143448079,-1.8259503274,0.9342956215\H,-1.4596393221,-1.1804749773,2.0228529251\H,-0.6117083756,-1.6572055412,3.5037535825\H,-1.6533353148,-2.8252068973,2.6585464102\H,1.8019862095,-4.0245821774,1.9099916566\H,0.3078917157,-4.3943204414,2.7839923798\H,1.4177945018,-3.149932639,3.4122703844\H,-2.384825115,-2.675662782,-1.0375777355\H,-1.4132675602,-3.8891171735,-1.8821075011\H,-1.5530733937,-2.2448125765,-2.5522892095\H,1.9296305767,-2.3562670305,-1.1657128835\H,0.966445045,-2.2773088496,-2.6455854359\H,1.0956953433,-3.81289632,-1.7562228485\O,1.78327552,0.1816914001,-0.402793832\H,0.2895777813,0.5196516568,0.9611929613\C,2.6334926637,1.0281914877,0.2057721899\O,2.5296593434,1.3646193039,1.3636869417\C,3.6940807714,1.4858660519,-0.7305898416\C,4.6335903228,2.3299048004,-0.3093159359\H,3.6563368405,1.1012702438,-1.7444098911\H,4.6244416,2.6839612907,0.7175878444\H,5.4185063232,2.6799321088,-0.9706553747\Version=ES64L-G09RevD.01\State=2-A\HF=-749.3913538\S2=0.755241\S2-1=0.\S2A=0.750018\RMSD=9.447e-09\RMSF=1.000e-05\Dipole=0.4456935,0.9382995,-0.5644039\Quadrupole=4.7981923,-8.1549147,3.3567225,-1.6737626,-2.7514454,-3.6926495\PG=C01 [X(C12H20N1O3)]\@\

### Cation m.1

1\1\GINC-R207\FOpt\RM062X\6-31+G(d,p)\C10H18N1O3(1+)\ROOT\28-Apr-2016\0\#M062X\6-31+G(d,p) INT(grid=ultrafine) OPT IOP(2/17=4) Freq=noraman maxdisk=402653184\NitroxideM. li.freq\1,1\C,-2.12546



56685,-0.014579322,0.8558054535\C,-1.5991954293,1.2402973021,0.1550985852\C,-1.5532834069,-1.2513888651,0.158938051\C,-1.949885506,-1.3675831077,-1.3202258109\C,-1.9997465603,1.3372430813,-1.3243882029\N,-1.7241178897,-0.011577261,-1.9908354023\H,-0.5065196745,1.2660871141,0.2381690608\H,-1.9802895895,2.1471497412,0.6365870206\H,-1.9007702591,-2.1701632025,0.6432439714\H,-0.4604006735,-1.2366521044,0.2420333551\C,-3.4435519831,-1.6978092272,-1.5169384606\C,-1.083659222,-2.3882348431,-2.0515242662\C,-1.1716922429,2.3868725593,-2.0588821955\C,-3.504559029,1.6115868815,-1.5220289154\O,-1.3517835239,-0.0064449936,-3.1142608047\H,-4.1056335417,-1.1043655584,-0.8880895397\H,-3.5651608608,-2.7475208106,-1.237835197\H,-3.7364355158,-1.5903834563,-2.564616815\H,-0.0331672849,-2.0865927772,-2.0666274629\H,-1.4229499005,-2.5579318634,-3.0742063205\H,-1.1605482642,-3.329279048,-1.5019913485\H,-0.1107948905,2.1241116954,-2.0731195368\H,-1.2832430661,3.3261307779,-1.5122446318\H,-1.516954051,2.5407986189,-3.0820609404\H,-4.1443581557,0.9960714382,-0.8913338673\H,-3.7932219636,1.4902347053,-2.5693581136\H,-3.6647904794,2.656952762,-1.2461344642\H,-3.2186014173,-0.0347428881,0.8632093272\C,-1.729020044,-0.00519274,2.3245444891\O,-2.508605756,-0.0191628565,3.2369758039\O,-0.3927051942,0.0207096889,2.4704768112\H,-0.1832689562,0.0257985591,3.4192903672\Version=ES64L-G09RevD.01\State=1-A\HF=-671.7762197\RMSD=9.320e-09\RMSF=1.131e-05\Dipole=0.1560536,0.0009079,-1.6092203\Quadrupole=-3.4124825,6.0549881,-2.6425056,-0.1649621,7.6374867,0.1327561\PG=C01 [X(C10H18N1O3)]\@

### Cation m.2

1\1\GINC-R37\FOpt\RM062X\Gen\C10H18N1O3(1+)\ROOT\15-Dec-2016\0\#M062X/gen 6D SCF=Tight INT(grid=ultrafine) OPT IOP(2/17=4) maxdisk=2952790016\CatM.1ii.freq\1,1\C,1.2744212382,0.0645178258,0.2938626141\C,0.5668052539,1.2860486056,-0.2781462444\C,0.6200694368,-1.2138657506,-0.235728512\C,-0.8687162389,-1.3401691345,0.1176811303\C,-0.9240311346,1.3650243102,0.0732819549\N,-1.5582103112,-0.0055715387,-0.1727249951\H,0.6865078156,1.2915922087,-1.3684588682\H,1.0312739611,2.2090928845,0.0830948483\H,1.1178294929,-2.1008104661,0.1684819665\H,0.7319473001,-1.2520480626,-1.3273707317\C,-1.1037223791,-1.6235382287,1.6151393661\C,-1.5553998164,-2.4039877969,-0.733217501\C,-1.6537967448,2.3705791675,-0.811893569\C,-1.1746470326,1.6878793083,1.5606591937\O,-2.6712670183,-0.0362550589,-0.5736152467\H,-0.5009865724,-0.9992435847,2.2742941213\H,-0.8158782345,-2.6654533443,1.7816839932\H,-2.1606970121,-1.5187852144,1.8766362833\H,-1.54811202,-2.1379204101,-1.7941550366\H,-2.5843031921,-2.584439958,-0.4168154064\H,-0.9895992217,-3.331369848,-0.6107245621\H,-1.6337041668,2.070132685,-1.8634040791\H,-1.1253277581,3.3232462654,-0.7212272928\H,-2.6894477397,2.5196869242,-0.5011576284\H,-0.552036623,1.108026132,2.2416649764\H,-2.2281009612,1.554547066,1.823396362\H,-0.9244912998,2.7443760822,1.6927217659\H,1.2524747527,0.0667361726,1.3915807903\C,2.7463590066,0.1022219298,-0.0928989521\O,3.2629473443,0.9934513602,-0.7123867546\O,3.3890411883,-0.9881173855,0.3474150049\H,4.3288186869,-0.921243146,0.0946910092\Version=ES64L-G09RevE.01\State=1-A\HF=-671.7554313\RMSD=9.595e-09\RMSF=1.765e-06\Dipole=-1.3408884,-0.4933552,0.5890922\Quadrupole=1.695878,3.1044064,-4.8002844,-4.8268662,0.879436,1.6126733\PG=C01 [X(C10H18N1O3)]\@

### Cation m.3

1\1\GINC-R206\FOpt\RM062X\6-31+G(d,p)\C10H18N1O3(1+)\ROOT\01-Dec-2017\0\#M062X/6-31+G(d,p) SCF=Tight INT(grid=ultrafine) OPT IOP(2/17=4) maxdisk=12GB\CatM2.freq\1,1\C,0.1514360794,-1.4032963034,0.6181533138\C,0.5229681464,0.063925213,0.290318391\C,0.065703298,1.0622938709,1.3637715992\C,-1.1746990712,0.6490626261,2.1556253734\N,-0.9384492108,-0.7383318059,2.7308631295\C,0.0327561447,-1.7265055415,2.1099540808\C,-2.4351248336,0.5011512316,1.2780989561\C,-1.4370432871,1.5945881755,3.3257795285\C,-0.5225274756,-3.1302888699,2.3377414475\C,1.349760644,-1.5224710692,2.8900412126\O,-1.5336545769,-1.0593397731,3.7022774223\H,0.903707283,-2.0839646296,0.2077651185\H,-0.7874433495,-1.6739752192,0.1271844473\H,-0.1728788014,2.0241406373,0.9001944852\H,0.8894229773,1.26296563,2.0547092888\H,-2.2887264594,-0.1584200582,0.4213865929\H,-2.6724733396,1.4993352976,0.9010646688\H,-3.2809464486,0.1466519701,1.8718511612\H,-0.5961082674,1.6000108526,4.0246497373\H,-2.3510744815,1.3359687317,3.8611905729\H,-1.5479972959,2.6016689059,2.9179341247\H,-1.5180157784,-3.2405948422,1.8985412323\H,-0.5672969284,-3.3818733703,3.3977177214\H,0.1498993855,-3.8356297869,1.8445105043\H,1.7832202082,-0.5292268704,2.7647545808\H,2.0627925656,-2.2501562722,2.4923086594\H,1.1974110281,-1.7330066685,3.9512069059\C,2.0294129232,0.1858742668,0.0841243667\H,0.0662086593,0.3016794094,-0.6748662881\O,2.7946210626,0.7072708064,0.8555400028\O,2.4015473527,-0.3967116207,-1.0599638394\H,3.3641818474,-0.3099949234,-1.1608084986\Version=ES64L-G09RevD.01\State=1-A\HF=-671.7794056\RMSD=8.550e-09\RMSF=5.429e-06\Dipole=-1.1239453,-0.4550241,0.1053217\Quadrupole=0.4977672,1.2388834,-1.7366506,-6.1401249,-4.8147392,-0.8491039\PG=C01 [X(C10H18N1O3)]\@

### Cation m.4

1\1\GINC-R1028\FOpt\RM062X\6-31+G(d,p)\C10H18N1O3(1+)\ROOT\28-Apr-2016\0\#M062X/6-31+G(d,p) INT(grid=ultrafine) OPT IOP(2/17=4) Freq=noraman maxdisk=402653184\NitroxideM.2i.freq\1,1\C,-2.06185 23961,-0.1866537344,0.7992380744\C,-1.5590944397,1.0912705542,0.1241064687\C,-1.5520554809,-1.4295 635982,0.0707044207\C,-1.7276719799,-1.477354828,-1.4605591888\C,-1.904337378,1.2159865881,-1.36813 75235\N,-1.4973912844,-0.0874378331,-2.0513320908\H,-0.469081475,1.1353538383,0.2303102137\H,-1.96 56929255,1.9773552447,0.6192522771\H,-2.0407719795,-2.3245749932,0.4660426751\H,-0.481435055,-1.52 20337986,0.2822111535\C,-3.1376597192,-1.9008862662,-1.9305410373\C,-0.687493772,-2.4078899616,-2.0 838841652\C,-1.114427682,2.3459573466,-2.0196236146\C,-3.4099519357,1.3959977356,-1.644347307\O,-1. 0123040523,-0.0197997004,-3.1293664364\H,-3.9455977659,-1.374314393,-1.4307753533\H,-3.2351804064,- 2.958576717,-1.6728072205\H,-3.2214392585,-1.8014437457,-3.0159804239\H,0.328951787,-2.0334432135,- 1.9355283309\H,-0.8613119022,-2.5643818607,-3.1488755127\H,-0.774246457,-3.3707147377,-1.574769429 4\H,-0.0373075212,2.1680390962,-1.965058328\H,-1.3390128855,3.2600576363,-1.4653125657\H,-1.397861 1696,2.4974974568,-3.061900881\H,-4.0424967821,0.6547055991,-1.1595900426\H,-3.6060845392,1.386641 537,-2.719733934\H,-3.6808066145,2.3794234548,-1.2517095288\C,-3.5580401804,-0.2135514355,1.0680768 569\H,-1.6210399054,-0.1977422872,1.804868387\O,-4.2760273414,-1.1623852264,0.8743946038\O,-3.9820 576987,0.9434405239,1.5937589118\H,-4.9189998038,0.8532617189,1.8357188721\Version=ES64L-G09Rev D.01\State=1-A\HF=-671.7794657\RMSD=6.131e-09\RMSF=8.820e-06\Dipole=0.7119111,0.5001952,-0.4548 467\Quadrupole=-1.8287157,2.5551593,-0.7264437,-4.3874975,-1.5237349,2.099963\PG=C01 [X(C10H18N1 O3)]\@

### Cation n

1\1\GINC-R261\FOpt\RM062X\6-31+G(d,p)\C9H15N2O2(1+)\ROOT\28-Apr-2016\0\#M062X/6-31+G(d,p) I NT(grid=ultrafine) OPT IOP(2/17=4) Freq=noraman maxdisk=402653184\NitroxideN.2.freq\1,1\C,-0.562526 889,-1.0571413556,-0.5566637091\C,0.1708666515,0.1050318056,-1.1917017405\N,0.6669149475,0.7968058 518,0.0539549135\C,0.1945236372,0.1603130965,1.3407578536\C,-0.5604852675,-1.0116209897,0.77678347 93\O,1.3553216034,1.753081308,0.0322814338\C,-0.7400127632,1.1124649078,-1.9169417842\C,1.38988828 25,-0.2811735977,-2.0373167314\C,-0.6847850462,1.189252096,2.0664217111\C,1.4377612148,-0.21919199 51,2.1550960241\H,-1.0493895485,-1.7091311029,1.4490253754\H,-1.5864131784,1.4074385351,-1.2915803 29\H,-1.1197046464,0.6080684368,-2.8066942796\H,-0.1613513987,1.9932356349,-2.2053186246\H,2.05429 43238,-0.9580318989,-1.4940567852\H,1.9369829908,0.6140295634,-2.3409016025\H,1.0099283897,-0.7916 176323,-2.9244639041\H,-1.541002442,1.4863757022,1.4566502666\H,-0.0946032709,2.0682718699,2.33596 13184\H,-1.056662468,0.722702375,2.9816058912\H,2.0823674755,-0.9067643462,1.6024274954\H,1.10107 89238,-0.7160053046,3.0679144107\H,1.9989588291,0.6764449017,2.4311168364\C,-1.2141484829,-2.05151 16795,-1.4779319659\N,-1.6867113066,-3.1882670413,-0.9248721998\O,-1.2989940948,-1.7855963387,-2.66 54621409\H,-1.495039611,-3.4669388252,0.0233710218\H,-2.1180868557,-3.861783977,-1.5435122343\Vers ion=ES64L-G09RevD.01\State=1-A\HF=-611.392623\RMSD=7.531e-09\RMSF=3.006e-06\Dipole=0.3444924,- 0.0308107,1.9253841\Quadrupole=-4.6125804,4.5533547,0.0592256,4.0390638,-1.6616371,-1.3910689\PG=C 01 [X(C9H15N2O2)]\@

### Cation o.1

1\1\GINC-R286\FOpt\RM062X\6-31+G(d,p)\C9H14N1O3(1+)\ROOT\28-Apr-2016\0\#M062X/6-31+G(d,p) I NT(grid=ultrafine) OPT IOP(2/17=4) Freq=noraman maxdisk=402653184\NitroxideO.2.freq\1,1\C,-0.542256 4129,-1.0486908042,-0.5912110528\C,0.1715361116,0.1267955312,-1.2134195172\N,0.6117283752,0.832455 5028,0.0485869594\C,0.1932355021,0.1332165389,1.3261980458\C,-0.5312374636,-1.0459012654,0.7420859 885\O,1.2259119065,1.8376323609,0.0434752921\C,-0.7377089237,1.0905098658,-1.989246279\C,1.4357693 546,-0.2374711552,-2.0048397334\C,-0.7042253204,1.1013085213,2.1093062044\C,1.4718969356,-0.228304 3437,2.0944319675\H,-0.9886784456,-1.8017727152,1.3716810588\H,-1.6115536367,1.3784963497,-1.39946 30477\H,-1.0745031513,0.5603747623,-2.8825768314\H,-0.1767723142,1.9796661041,-2.2858861478\H,2.09 68902739,-0.887341617,-1.4260697311\H,1.9678794272,0.6692994363,-2.301264182\H,1.1084096642,-0.773 3623051,-2.8982424317\H,-1.5845252671,1.389455047,1.5300147569\H,-0.1396363849,1.9905850718,2.3989 200932\H,-1.0380340291,0.5870934003,3.0134895978\H,2.1241820396,-0.8765536937,1.5046577962\H,1.17 56597386,-0.7654924965,2.9983482212\H,2.0084345509,0.6781053811,2.3842536019\C,-1.1709724206,-2.06 75444416,-1.4745363846\O,-1.7608316532,-3.041050497,-0.7834841542\O,-1.1326315349,-1.9908973435,-2. 6780346795\H,-2.1539769218,-3.6774011951,-1.4039454115\Version=ES64L-G09RevD.01\State=1-A\HF=-6 31.2569953\RMSD=5.151e-09\RMSF=1.068e-05\Dipole=0.3233358,0.5143818,1.3155785\Quadrupole=-2.584 4122,0.6280283,1.956384,3.1478367,0.7151407,1.0970082\PG=C01 [X(C9H14N1O3)]\@

### Cation o.2

1\1\GINC-R286\FOpt\RM062X\6-31+G(d,p)\C9H14N1O3(1+)\ROOT\28-Apr-2016\0\#M062X/6-31+G(d,p) I NT(grid=ultrafine) OPT IOP(2/17=4) Freq=noramanmaxdisk=402653184\NitroxideO.2.freq\1,1\C,-0.5422564

129,-1.0486908042,-0.5912110528\C,0.1715361116,0.1267955312,-1.2134195172\N,0.6117283752,0.8324555  
028,0.0485869594\C,0.1932355021,0.1332165389,1.3261980458\C,-0.5312374636,-1.0459012654,0.74208598  
85\O,1.2259119065,1.8376323609,0.0434752921\C,-0.7377089237,1.0905098658,-1.989246279\C,1.43576935  
46,-0.2374711552,-2.0048397334\C,-0.7042253204,1.1013085213,2.1093062044\C,1.4718969356,-0.2283043  
437,2.0944319675\H,-0.9886784456,-1.8017727152,1.3716810588\H,-1.6115536367,1.3784963497,-1.399463  
0477\H,-1.0745031513,0.5603747623,-2.8825768314\H,-0.1767723142,1.9796661041,-2.2858861478\H,2.096  
8902739,-0.887341617,-1.4260697311\H,1.9678794272,0.6692994363,-2.301264182\H,1.1084096642,-0.7733  
623051,-2.8982424317\H,-1.5845252671,1.389455047,1.5300147569\H,-0.1396363849,1.9905850718,2.39892  
00932\H,-1.0380340291,0.5870934003,3.0134895978\H,2.1241820396,-0.8765536937,1.5046577962\H,1.175  
6597386,-0.7654924965,2.9983482212\H,2.0084345509,0.6781053811,2.3842536019\C,-1.1709724206,-2.067  
5444416,-1.4745363846\O,-1.7608316532,-3.041050497,-0.7834841542\O,-1.1326315349,-1.9908973435,-2.6  
780346795\H,-2.1539769218,-3.6774011951,-1.4039454115\Version=ES64L-G09RevD.01\State=1-A\HF=-63  
1.2569953\RMSD=5.151e-09\RMSF=1.068e-05\Dipole=0.3233358,0.5143818,1.3155785\Quadrupole=-2.5844  
122,0.6280283,1.956384,3.1478367,0.7151407,1.0970082\PG=C01 [X(C9H14N1O3)]\@

### Cation p

1\1\GINC-R2550\FOpt\RM062X\6-31+G(d,p)\C8H14N1O3(1+)\ROOT\28-Apr-2016\0\#M062X/6-31+G(d,p)  
INT(grid=ultrafine) OPT IOP(2/17=4) Freq=noraman maxdisk=402653184\NitroxideP.freq\1,1\O,-1.8446505  
87,-0.2058139605,0.6660435443\C,-2.3995842995,0.8674212814,0.0757981725\C,-1.062951348,-1.10520269  
46,-0.102723638\C,-1.7127280664,-1.43096363,-1.4532542558\C,-2.1061952493,1.1523808658,-1.413176528  
1\N,-1.7412522534,-0.1084434386,-2.1621807781\H,-1.0003671736,-2.0264387041,0.4792665355\H,-0.04795  
89855,-0.7120652445,-0.2395943595\C,-3.1869632464,-1.8581271174,-1.3107410171\C,-0.8899751177,-2.42  
11588155,-2.25888376\C,-0.8914954754,2.0974861599,-1.5113010685\C,-3.3445296686,1.7417197036,-2.102  
3668833\O,-1.4791946699,-0.0288188871,-3.311895195\H,-3.7939253703,-1.1436614998,-0.7505517801\H,-3.1  
924040865,-2.8024507256,-0.7600277023\H,-3.6283155169,-2.0247846979,-2.2959553668\H,0.134245619,-2.  
0691334735,-2.408765012\H,-1.3434444908,-2.6143857295,-3.2322694209\H,-0.857942514,-3.3619598241,-1.7  
048446188\H,0.0036472688,1.6691077192,-1.0526224058\H,-1.1550434189,3.0093235387,-0.9715480746\H,-  
0.6926450917,2.3425015587,-2.5562430358\H,-4.1890230404,1.0487175667,-2.0727157314\H,-3.1067294502,1  
.9998944968,-3.1356024708\H,-3.6218726504,2.6409039829,-1.5514448293\O,-3.0718111171,1.6364315692,  
0.6913196797\Version=ES64L-G09RevD.01\State=1-A\HF=-593.144327\RMSD=8.408e-09\RMSF=6.174e-0  
6\Dipole=0.790291,-1.0953254,-1.4475608\Quadrupole=-0.3270145,8.5190188,-8.1920043,0.3850103,3.35853  
57,-3.5536261\PG=C01 [X(C8H14N1O3)]\@

### Cation r

1\1\GINC-R636\FOpt\RM062X\6-31+G(d,p)\C8H16N1O2(1+)\ROOT\28-Apr-2016\0\#M062X/6-31+G(d,p) I  
NT(grid=ultrafine) OPT IOP(2/17=4) Freq=noraman maxdisk=268435456\NitroxideR.freq\1,1\C,-0.74350397  
92,-1.2513636205,-1.1559582288\C,0.0604220149,0.0569330412,-1.3344363122\N,-0.0048985198,0.7798115  
358,0\C,0.0604220149,0.0569330412,1.3344363122\C,-0.7435039792,-1.2513636205,1.1559582288\O,-0.345  
0410164,-1.9370053851,0\O,-0.1205387657,1.9592900967,0\C,-0.5487891896,0.9582583397,-2.3969041282\  
C,1.5431556027,-0.2419213165,-1.6236997107\C,-0.5487891896,0.9582583397,2.3969041282\C,1.543155602  
7,-0.2419213165,1.6236997107\H,-1.8211192651,-1.0330356884,1.1320323949\H,-0.5330625004,-1.8901226  
563,2.0168690551\H,-1.5532981182,1.2917658934,-2.1242915667\H,-0.6176808299,0.3762886543,-3.319531  
8188\H,0.0752140613,1.8320997831,-2.5912490108\H,1.9143706856,-1.0793644454,-1.0349354112\H,2.1682  
451647,0.6409023658,-1.4660144397\H,1.6033105051,-0.5120534738,-2.6810675109\H,-1.5532981182,1.291  
7658934,2.1242915667\H,0.0752140613,1.8320997831,2.5912490108\H,-0.6176808299,0.3762886543,3.3195  
318188\H,1.9143706856,-1.0793644454,1.0349354112\H,1.6033105051,-0.5120534738,2.6810675109\H,2.16  
82451647,0.6409023658,1.4660144397\H,-0.5330625004,-1.8901226563,-2.0168690551\H,-1.8211192651,-1.  
0330356884,-1.1320323949\Version=ES64L-G09RevD.01\State=1-A\HF=-519.1476329\RMSD=3.558e-09\R  
MSF=2.184e-05\Dipole=-0.0258837,0.2877731,0\Quadrupole=-1.5044411,-7.066058,8.5704991,0.4834515,0.,  
0\PG=CS [SG(N1O2),X(C8H16)]\@

### Nitroxide TEMPO

1\1\GINC-R3523\FOpt\UM062X\6-31+G(d,p)\C9H18N1O1(2)\ROOT\18-Nov-2014\0\#M062X/6-31+G(d,p) I  
NT(grid=ultrafine) OPT IOP(2/17=4) Freq=noramanmaxdisk=268435456\TEMPO.freq\0,2\C,-3.1795695774,  
0.6943840806,-0.1543978295\N,-3.0111091496,-0.6645227138,-0.7474070193\C,-2.1216419643,-1.71861663  
51,-0.1778452386\C,-0.8388983908,-1.0785296864,0.3680998261\C,-1.098476247,0.1548451927,1.22687578  
15\C,-1.835785072,1.1952442897,0.3901943528\C,-3.6560721161,1.6204220309,-1.274930014\C,-4.2509331  
437,0.638971433,0.9459956346\C,-2.8804531409,-2.4869222357,0.9156209616\C,-1.7714822058,-2.6780921  
076,-1.3166991768\O,-3.9914971532,-1.0875822902,-1.4441355913\H,-0.2044304603,-0.7887816971,-0.4802  
770318\H,-0.2927318602,-1.8456082837,0.9290419387\H,-0.1493419719,0.5675071656,1.5834918306\H,-1.6

779759482,-0.1079021929,2.1199763312\H,-1.1988640854,1.4793971645,-0.4582368735\H,-2.0258390315,2.107392652,0.9674537094\H,-2.9604672147,1.5864125622,-2.1183802738\H,-3.7017280578,2.6464577713,-0.8968153984\H,-4.6440264258,1.3242459484,-1.6301073411\H,-3.9056557026,0.1110272116,1.8382430558\H,-5.1406851559,0.1331938842,0.5613572075\H,-4.5251846193,1.6569024339,1.2404806744\H,-3.0283905726,-1.8899049507,1.8187997648\H,-2.3155619019,-3.3829709303,1.1915076377\H,-3.858031528,-2.7923787955,0.5329290769\H,-1.3312005709,-2.1297411036,-2.154490572\H,-2.6612429111,-3.1982355339,-1.6740528207\H,-1.0451436066,-3.4128794674,-0.9556946844\Version=ES64L-G09RevD.01\State=2-A\HF=-483.5234304\S2=0.754861\S2-1=0.\S2A=0.750014\RMSD=3.991e-09\RMSF=5.988e-06\Dipole=0.8207978,0.3514986,0.8605761\Quadrupole=-0.7073146,2.3702525,-1.6629378,-1.6385592,-2.2349817,-0.9337956\PG=CS [SG(C1H2N1O1),X(C8H16)]\@

### Nitroxide a.1

1\1\GINC-R278\FOpt\UM062X\6-31+G(d,p)\C9H16N1O2(2)\ROOT\28-Apr-2016\0\#M062X\6-31+G(d,p) IN T(grid=ultrafine) OPT IOP(2/17=4) Freq=noraman maxdisk=402653184\NitroxideA.freq\0,2\C,-1.3187957309,0.3009776879,0.0750811002\C,-1.259589816,-1.0121361435,-0.7292009159\C,0,-1.7811958418,-0.4090697062\C,1.259589816,-1.0121361435,-0.7292009159\C,1.3187957309,0.3009776879,0.0750811002\N,0,0.9982434561,-0.0057462148\O,0,2.2136398464,0.3765496069\C,-1.6718551148,0.0192537297,1.5432392741\C,-2.3645390133,1.2314130453,-0.5387719223\H,-1.2601460071,-0.7743625699,-1.8005153755\H,-2.1350123447,-1.6244194913,-0.4993872046\H,1.2601460071,-0.7743625699,-1.8005153755\H,2.1350123447,-1.6244194913,-0.4993872046\C,2.3645390133,1.2314130453,-0.5387719223\C,1.6718551148,0.0192537297,1.5432392741\H,-1.0760505469,-0.7938403115,1.9652033632\H,-2.7248207509,-0.2698578378,1.6132195077\H,-1.5168955981,0.9252915936,2.1351980238\H,-2.064032564,1.5328460807,-1.5461861299\H,-2.4846744012,2.1290319144,0.0690559643\H,-3.3215753138,0.7046260658,-0.5964164959\H,2.064032564,1.5328460807,-1.5461861299\H,3.3215753138,0.7046260658,-0.5964164959\H,2.4846744012,2.1290319144,0.0690559643\H,1.0760505469,-0.7938403115,1.9652033632\H,1.5168955981,0.9252915936,2.1351980238\H,2.7248207509,-0.2698578378,1.6132195077\O,0,-2.8820049853,0.0978979259\Version=ES64L-G09RevD.01\State=2-A\HF=-557.5153744\S2=0.75482\S2-1=0.\S2A=0.750014\RMSD=7.589e-09\RMSF=1.033e-05\Dipole=0,0.0414782,-0.4648758\Quadrupole=7.4005147,-11.8728859,4.4723712,0,0,0.8636565\PG=CS [SG(C1N1O2),X(C8H16)]\@

### Nitroxide a.2

1\1\GINC-R74\FOpt\UM062X\6-31+G(d,p)\C9H16N1O2(2)\ROOT\29-Nov-2017\0\#M062X\6-31+G(d,p) SC F=Tight INT(grid=ultrafine) OPT IOP(2/17=4) maxdisk=12GB\CatA.freq\0,2\C,-1.4625347252,-0.7375558797,1.4900744844\C,-2.8758024434,-0.9613306347,0.991032749\C,-3.5360695893,0.2132946756,0.2977936234\C,-2.9951014137,1.5864870986,0.7156348353\N,-1.5113520648,1.5734631688,0.6394344877\C,-0.6822563285,0.3440421209,0.7322964533\O,-3.4456812132,-2.0197509637,1.1381442089\C,-3.4125610067,1.9363684317,2.1517047217\C,-3.5169505626,2.6517507174,-0.249154447\C,0.5942952474,0.6819165627,1.5031144219\C,-0.324884553,-0.1187793976,-0.6879533826\O,-0.9125731154,2.6860443961,0.4856589694\H,-0.927504867,-1.6909120013,1.4494629794\H,-1.5371491185,-0.4606722327,2.5504354157\H,-4.6137778645,0.1585404261,0.4776302281\H,-3.3871148418,0.0737187121,-0.7815213646\H,-3.1277451819,1.1554442071,2.8632557145\H,-4.4979456096,2.0657053985,2.2057290129\H,-2.9312494607,2.871331104,2.4503945157\H,-3.1460928049,2.4657142884,-1.2612237265\H,-3.1879377587,3.6448614949,0.0582669458\H,-4.6105198071,2.6212287017,-0.2608283084\H,0.3495173173,1.102983443,2.4825103337\H,1.1926963889,1.4118721113,0.9571108508\H,1.1801752083,-0.2309691683,1.6457621263\H,-1.2066483339,-0.4481537887,-1.2458668944\H,0.3806410074,-0.954236518,-0.6436256073\H,0.141497495,0.7075035256,-1.2308733468\Version=ES64L-G09RevD.01\State=2-A\HF=-557.5146868\S2=0.755176\S2-1=0.\S2A=0.750017\RMSD=6.422e-09\RMSF=1.053e-05\Dipole=0.0391388,0.0723491,-0.0104077\Quadrupole=3.4763119,-8.2208402,4.7445283,-8.8424425,1.1325733,1.8855547\PG=C01 [X(C9H16N1O2)]\@

### Nitroxide b.1

1\1\GINC-R528\FOpt\UM062X\6-31+G(d,p)\C9H18N1O2(2)\ROOT\28-Apr-2016\0\#M062X\6-31+G(d,p) IN T(grid=ultrafine) OPT IOP(2/17=4) Freq=noraman maxdisk=402653184\NitroxideC.1.freq\0,2\C,-0.3836850378,-1.31685687,0.1034860503\C,1.078658559,-1.2390403912,-0.3512729132\C,1.8094932373,0,0.1478912042\C,1.078658559,1.2390403912,-0.3512729132\C,-0.3836850378,1.31685687,0.1034860503\N,-1.0509439019,0,-0.1136323162\O,-2.3210412895,0,-0.0062087419\C,-0.4962050344,-1.7090833693,1.585619771\C,-1.1295157341,-2.3473431125,-0.7464793418\H,1.1084308709,-1.2317884582,-1.4513615864\H,1.6019533994,-2.1413651324,-0.0165665744\H,1.1084308709,1.2317884582,-1.4513615864\H,1.6019533994,2.1413651324,-0.0165665744\C,-1.1295157341,2.3473431125,-0.7464793418\C,-0.4962050344,1.7090833693,1.585619771\H,0.1305148306,-1.0911234964,2.2329347517\H,-0.186206421,-2.75097455,1.7118507051\H,-1.5365295803,-1.6106390251,1.9070567402\H,-1.157484974,-2.0297460221,-1.7927652564\H,-2.1550041612,-2.4678766642,-0.3947048139\H,-0.6107296467,-3.3086179541,-0.6826617795\H,-1.157484974,2.0297460221,-1.7927652564\H,

-0.6107296467,3.3086179541,-0.6826617795\H,-2.1550041612,2.4678766642,-0.3947048139\H,0.1305148306,1.0911234964,2.2329347517\H,-1.5365295803,1.6106390251,1.9070567402\H,-0.186206421,2.75097455,1.7118507051\O,3.169485622,0,-0.2524756964\H,1.8497610181,0,1.2425851298\H,3.2083712523,0,-1.2171010761\Version=ES64L-G09RevD.01\State=2-A\HF=-558.7197282\S2=0.754858\S2-1=0.\S2A=0.750014\RMSD=6.797e-09\RMSF=1.301e-05\Dipole=0.5494301,0,-0.2279559\Quadrupole=-9.8122808,5.1255375,4.6867432,0,-3.3644438,0.\PG=CS [SG(C1H2N1O2),X(C8H16)]\@

### Nitroxide b.2

1\1\GINC-R834\FOpt\UM062X\6-31+G(d,p)\C9H18N1O2(2)\ROOT\28-Apr-2016\0\#M062X\6-31+G(d,p) IN T(grid=ultrafine) OPT IOP(2/17=4) Freq=norman maxdisk=402653184\NitroxideC.2.freq\0,2\C,-0.3726851232,-1.3129526657,0.1121948395\C,1.0925215088,-1.2287347546,-0.3284884277\C,1.8088432945,0.006425193,0.1852372811\C,1.0832911648,1.2430851687,-0.3282726149\C,-0.3830008264,1.3212813844,0.1140085064\N,-1.0446333893,0.0022975627,-0.1023253885\O,-2.3148843524,-0.0007950123,0.0024397111\C,-0.5036419513,-1.7149110082,1.5903070226\C,-1.1045583275,-2.3402318411,-0.7536953702\H,1.149023007,-1.209816656,-1.4244467581\H,1.6159363882,-2.129666856,0.0092387355\H,1.1381348201,1.2252012384,-1.4243563918\H,1.5886577424,2.1576731191,0.0095400763\C,-1.1218504134,2.3458100636,-0.7491975108\C,-0.5137071046,1.7199601576,1.5931143142\H,0.1065421845,-1.0931287743,2.2500153648\H,-0.1834298613,-2.753839657,1.7154245085\H,-1.5495865219,-1.6298814477,1.8969627707\H,-1.1173922775,-2.0170772442,-1.7984122627\H,-2.1345261977,-2.465227971,-0.4167280567\H,-0.5841468627,-3.3004827045,-0.6883767396\H,-1.1326144661,2.0253041715,-1.7947135263\H,-0.6097592555,3.3105168958,-0.6809741927\H,-2.1528197408,2.4615800787,-0.411967208\H,0.0975901114,1.0975581779,2.2510901247\H,-1.5592271945,1.6302709357,1.8997831538\H,-0.1982824303,2.7602395924,1.7211977978\O,3.1382821715,-0.059314224,-0.3077864006\H,1.8252678809,0.0021492014,1.2855568809\H,3.6269060225,0.7152578758,-0.0070302392\Version=ES64L-G09RevD.01\State=2-A\HF=-558.719955\S2=0.754867\S2-1=0.\S2A=0.750014\RMSD=5.344e-09\RMSF=6.782e-06\Dipole=0.8779104,0.4733964,0.4786435\Quadrupole=-6.2357911,5.0686079,1.1671832,3.771824,1.8561235,-0.047468\PG=C01 [X(C9H18N1O2)]\@

### Nitroxide b.3

1\1\GINC-R97\FOpt\UM062X\6-31+G(d,p)\C9H18N1O2(2)\ROOT\30-Mar-2017\0\#M062X\6-31+G(d,p) IN T(grid=ultrafine) OPT IOP(2/17=4) Freq=norman maxdisk=134217728\NitroxideC.3.freq\0,2\C,-0.0091419961,-0.0056465011,-0.0063652219\C,-0.0179654346,-0.008454791,1.5269636177\C,1.3728079849,-0.0163107609,2.1468163005\C,2.1222063198,-1.2502307953,1.6628515991\C,2.2655042519,-1.3254450566,0.1380124854\N,0.9535262883,-1.0294019198,-0.5079912699\O,0.8781947893,-1.2954715461,-1.7522033034\C,0.3722670581,1.3734812666,-0.568305595\C,-1.3944721354,-0.3940684908,-0.5266218363\H,-0.5519159686,-0.9047099061,1.8773805063\H,-0.5787674667,0.8640597192,1.8793862387\H,1.5756994026,-2.1392963748,2.0123042478\H,3.1198730838,-1.282103661,2.1141274557\C,2.6598030918,-2.7464652981,-0.2691822514\C,3.3249173215,-0.3396937685,-0.3808340618\H,1.2891456966,1.7692013365,-0.1250912416\H,-0.4338275307,2.0854655743,-0.366258031\H,0.5104523216,1.2967813645,-1.6500966905\H,-1.6398387135,-1.4177017483,-0.2294589545\H,-1.4288959735,-0.3329058866,-1.615186175\H,-2.1405711997,0.2851801178,-0.1032768026\H,1.8662274138,-3.4520117334,-0.0069181381\H,3.5744809799,-3.0309176785,0.2597018747\H,2.8328790889,-2.8056187248,-1.3445616086\H,3.174534165,0.6752188593,-0.0052840912\H,3.2930307467,-0.3176094895,-1.473422605\H,4.3184593425,-0.6719163394,-0.0645550967\O,1.3130160738,0.0358370136,3.56226075\H,1.9174834594,0.8915013851,1.8653657548\H,0.8438683313,-0.7451963353,3.8814456817\Version=ES64L-G09RevD.01\State=2-A\HF=-558.7197281\S2=0.754857\S2-1=0.\S2A=0.750014\RMSD=8.426e-09\RMSF=9.337e-06\Dipole=-0.0552517,-0.0351196,0.5916151\Quadrupole=4.5241148,2.1282865,-6.6524013,-1.3450169,-2.854503,-6.2407982\PG=C01 [X(C9H18N1O2)]\@

### Nitroxide c.1

1\1\GINC-R423\FOpt\UM062X\6-31+G(d,p)\C9H17N2O2(2)\ROOT\28-Apr-2016\0\#M062X\6-31+G(d,p) IN T(grid=ultrafine) OPT IOP(2/17=4) Freq=norman maxdisk=402653184\NitroxideB.1.freq\0,2\C,-1.3110055231,0.3022561111,0.0572258587\C,-1.2366146671,-0.9774899036,-0.7950754474\C,0.0149512226,-1.7349037025,-0.4695456208\C,1.2760004185,-0.97964904,-0.7508373258\C,1.3298842929,0.3225272589,0.0708438019\N,0.0041027667,1.0111483093,0.0117069056\O,-0.0059852062,2.2124187747,0.4368236239\C,-1.6668804941,-0.0421386751,1.5106024689\C,-2.3589753607,1.2480059491,-0.5277505314\H,-1.2037155394,-0.697666582,-1.8557154512\H,-2.1296126736,-1.5793166897,-0.6205829037\H,1.306965032,-0.7277261007,-1.8188407128\H,2.1506165418,-1.5914826325,-0.5135182672\C,2.3619932208,1.2708168394,-0.5384998239\C,1.6926468456,0.0276963394,1.5331904917\H,-1.061160012,-0.8669447377,1.8950122254\H,-2.716209718,-0.3476568639,1.5643750386\H,-1.5227607361,0.8389508568,2.1418503743\H,-2.0576329893,1.5839869137,-1.5240442235\H,-2.484799164,2.1247361004,0.1086327309\H,-3.313505037,0.7190239444,-0.605388091\H,2.0542219824,1.5774184239,-1.542337106\H,3.3252128836,0.755894255,-0.6054267451\H,2.4747011819,2.164461491,

0.0765677618\H,1.1025777355,-0.7952192588,1.9435367159\H,1.5318960716,0.9251964232,2.1365142249\H,2.7485546174,-0.2532749313,1.5955902102\N,0.1021182459,-2.8845691022,0.0754580322\O,-1.1490104384,-3.4445192346,0.3310730781\H,-0.9316755003,-4.3041905358,0.7085187067\Version=ES64L-G09RevD.01\State=2-A\HF=-612.8017448\S2=0.754836\S2-1=0.\S2A=0.750014\RMSD=5.078e-09\RMSF=1.839e-05\Dipole=-0.0134443,-0.8801805,-0.1900647\Quadrupole=2.9961636,-4.4287397,1.4325761,0.7789965,-0.3824438,-2.5178906\PG=C01 [X(C9H17N2O2)]\@

### Nitroxide c.2

1\1\GINC-R51\FOpt\UM062X\6-31+G(d,p)\C9H17N2O2(2)\ROOT\29-Nov-2017\0\#M062X\6-31+G(d,p) SC F=Tight INT(grid=ultrafine) OPT IOP(2/17=4) maxdisk=12GB\RadC2.freq\0,2\C,-1.6116262246,-0.6339994046,1.6706739741\C,-3.0032682431,-0.8223722281,1.1420836122\C,-3.7058901012,0.3640461255,0.5403172384\C,-3.0071684183,1.7066061838,0.7967736817\N,-1.5452739166,1.5635659291,0.5691637417\C,-0.7897514963,0.2990132558,0.7699528435\N,-3.4968475272,-1.9979858502,1.1738401242\C,-3.2445110525,2.201078721,2.2326864014\C,-3.5430747691,2.7433588305,-0.1913330898\C,0.5374154563,0.6300131416,1.4514570574\C,-0.5401968833,-0.3361336495,-0.6039149834\O,-0.8874176782,2.5980542305,0.2260388441\H,-1.1162610333,-1.6062565124,1.7428278107\H,-1.6480855467,-0.2099156765,2.681526599\H,-4.7331889772,0.4112923773,0.9182411491\H,-3.7948981746,0.188519967,-0.5406382534\H,-2.9894283669,1.4440347428,2.9789169325\H,-4.2989382334,2.4636230029,2.3646686087\H,-2.6365932926,3.09166146,2.4138216377\H,-3.2785669957,2.4675873574,-1.2158510478\H,-3.1257595295,3.7292767785,0.0156830232\H,-4.633055867,2.7867992158,-0.1052534716\H,0.3624165457,1.1512082461,2.397486772\H,1.1465944659,1.2719244069,0.8143353608\H,1.0804109386,-0.2981143331,1.6537867355\H,-1.4779309346,-0.6321027993,-1.0845078462\H,0.0863077291,-1.2274658548,-0.4989592401\H,-0.0280932519,0.3835092325,-1.2479323516\O,-4.7806229302,-2.0206521358,0.6302674457\H,-5.0426556916,-2.9439947606,0.7172706903\Version=ES64L-G09RevD.01\State=2-A\HF=-612.8002191\S2=0.755191\S2-1=0.\S2A=0.750017\RMSD=4.917e-09\RMSF=7.000e-06\Dipole=-0.5032298,-0.7027126,0.3015833\Quadrupole=1.7329153,-2.0705375,0.3376223,-2.9325983,1.1326868,2.3199126\PG=C01 [X(C9H17N2O2)]\@

### Nitroxide d.1

1\1\GINC-R223\FOpt\UM062X\6-31+G(d,p)\C10H18N1O2(2)\ROOT\30-Mar-2017\0\#M062X\6-31+G(d,p) I NT(grid=ultrafine) OPT IOP(2/17=4) Freq=noraman maxdisk=134217728\NitroxideD.1.freq\0,2\C,0.1422095189,0.5246296337,-1.3192096496\C,0.5133382902,-0.9630103042,-1.2507763816\C,0.0000666197,-1.6278677355,0.\C,0.5133382902,-0.9630103042,1.2507763816\C,0.1422095189,0.5246296337,1.3192096496\N,0.4103815175,1.1722925808,0.\O,0.389149575,2.446609149,0.\C,-1.3358040182,0.717074564,-1.6928457695\C,1.0232452436,1.2239944819,-2.3550259863\H,1.606654078,-1.0651577393,-1.261407079\H,0.1262890453,-1.4720356142,2.1398525761\C,1.0232452436,1.2239944819,2.3550259863\C,-1.3358040182,0.717074564,1.6928457695\H,-2.0014060803,0.1134733148,-1.0714916529\H,-1.4888139249,0.4247902962,-2.7365809484\H,-1.6049909105,1.7707632057,-1.5805536449\H,2.0718302799,1.194950043,-2.04576176\H,0.7265730251,2.2668462917,-2.4737679674\H,0.9242366006,0.7091775271,-3.3155455538\H,2.0718302799,1.194950043,2.04576176\H,0.9242366006,0.7091775271,3.3155455538\H,0.7265730251,2.2668462917,2.4737679674\H,-2.0014060803,0.1134733148,1.0714916529\H,-1.6049909105,1.7707632057,1.5805536449\H,-1.4888139249,0.4247902962,2.7365809484\O,0.0328805977,-3.0476064332,0.\C,-1.2431528766,-2.4168208059,0.\H,-1.8105138644,-2.5245340781,-0.9231609\H,-1.8105138644,-2.5245340781,0.9231609\Version=ES64L-G09RevD.01\State=2-A\HF=-596.7801838\S2=0.754858\S2-1=0.\S2A=0.750014\RMSD=2.754e-09\RMSF=8.168e-06\Dipole=-0.5732859,-0.3956209,0.\Quadrupole=4.26971,-10.8292594,6.5595494,1.3529096,0,0.\PG=CS [SG(C2N1O2),X(C8H18)]\@

### Nitroxide d.2

1\1\GINC-R76\FOpt\UM062X\6-31+G(d,p)\C10H18N1O2(2)\ROOT\30-Mar-2017\0\#M062X\6-31+G(d,p) I NT(grid=ultrafine) OPT IOP(2/17=4) Freq=noraman maxdisk=134217728\NitroxideD.2.freq\0,2\C,0.1496836395,-0.5096769468,-1.316517917\C,-0.9648337268,0.545186611,-1.2565439647\C,-0.9142298626,1.3768892444,0.\C,-0.9648337268,0.545186611,1.2565439647\C,0.1496836395,-0.5096769468,1.316517917\N,0.2484386729,-1.2071893336,0.\O,0.9244591464,-2.2878541856,0.\C,1.5026732193,0.1286396465,-1.6692348217\C,-0.2065324837,-1.5665326027,-2.3626203681\H,-1.9395231589,0.0413450123,-1.2935881182\H,-0.8859231251,1.1904075262,-2.1381164348\H,-1.9395231589,0.0413450123,1.2935881182\H,-0.8859231251,1.1904075262,2.1381164348\C,-0.2065324837,-1.5665326027,2.3626203681\C,1.5026732193,0.1286396465,1.6692348217\H,1.7097777948,1.0145880564,-1.0669500944\H,1.493399455,0.4339650318,-2.7205332863\H,2.2982360435,-0.6079626558,-1.5267011855\H,-1.1026572362,-2.1171859634,-2.0620871881\H,0.6103564678,-2.278523976,-2.4862295172\H,-0.3992295608,-1.0711529253,-3.3192993664\H,-1.1026572362,-2.1171859634,2.0620871881\H,-0.3992295608,-1.0711529253,3.3192993664\H,0.6103564678,-2.278523976,2.4862295172\H,1.7097777948,1.0145880564,1.0669500944\H,2.2982360435,-0.6079626558,1.5267011855\H,1.493399455,0.4339650318,

2.7205332863\C,-1.3803761152,2.7698249725,0.\O,0.010975504,2.465947268,0.\H,-1.7552710011,3.2083392034,0.9228408774\H,-1.7552710011,3.2083392034,-0.9228408774\Version=ES64L-G09RevD.01\State=2-A\HF=-596.7806245\S2=0.754852\S2-1=0.\S2A=0.750014\RMSD=5.851e-09\RMSF=1.128e-05\Dipole=-1.0696962,0.8605077,0.\Quadrupole=1.6544791,-6.1508052,4.4963261,-1.3325119,0.,0.\PG=CS [SG(C2N1O2),X(C8H18)]\@

### Nitroxide e.1

1\1\GINC-R241\FOpt\UM062X\6-31+G(d,p)\C10H20N1O3(2)\ROOT\30-Mar-2017\0\#M062X\6-31+G(d,p) I NT(grid=ultrafine) OPT IOP(2/17=4) Freq=noraman maxdisk=134217728\NitroxideE.1ii.freq\0,2\C,0.0238481095,-0.0060012694,0.0140794359\C,0.0225799414,-0.0322958308,1.5484154505\C,1.404320653,-0.0390794153,2.2108231169\C,2.2311869553,-1.1849447416,1.6412581145\C,2.3450988494,-1.2302131261,0.1101935815\N,1.0077675635,-0.9978185884,-0.5035099688\O,0.9091887816,-1.2855033516,-1.7416739082\C,0.3416433856,1.3837748891,-0.5608582972\C,-1.357445845,-0.4431859332,-0.4830320154\H,-0.5060806655,-0.9381176501,1.8745534251\H,-0.5554858445,0.8233022427,1.9159695947\H,1.7719957463,-2.123509874,1.9793666456\H,3.2437540265,-1.141608053,2.0595422013\C,2.7914631321,-2.6351254687,-0.3050681679\C,3.3518178783,-0.2043722944,-0.4353939824\H,1.267379934,1.7920125342,-0.1567577734\H,-0.4744070114,2.0712178485,-0.3138571466\H,0.4168215559,1.3087319802,-1.6493179169\H,-1.5603422159,-1.4783981864,-0.1931801378\H,-1.4159783432,-0.3716684129,-1.5698474845\H,-2.1193913812,0.2043430249,-0.0382342219\H,2.0304875714,-3.3748350487,-0.0390909522\H,3.7232213331,-2.8831972645,0.2128162395\H,2.9570295646,-2.6829424086,-1.3820287706\H,3.1624724939,0.7986523764,-0.0549092633\H,3.3009811297,-0.2046919247,-1.527787826\H,4.3627497925,-0.4962321621,-0.1322452046\C,1.2573168264,-0.2231589109,3.722709335\O,2.1051728206,1.1790303697,1.9932182969\O,0.5926495871,0.9353663544,4.2090139684\H,0.6798900841,-1.1298358992,3.9452750486\H,2.2594986587,-0.3114813318,4.1627992411\H,1.6844576766,1.8456304156,2.555659659\H,0.6461678426,0.9698727809,5.168806303\Version=ES64L-G09RevD.01\State=2-A\HF=-673.2165447\S2=0.754882\S2-1=0.\S2A=0.750014\RMSD=4.461e-09\RMSF=1.554e-05\Dipole=0.0074474,0.0848452,2.030203\Quadrupole=-1.0395322,-1.3532452,2.3927774,-2.0249545,-0.7205482,-2.5724408\PG=C01 [X(C10H20N1O3)]\@

### Nitroxide e.2

1\1\GINC-R277\FOpt\UM062X\6-31+G(d,p)\C10H20N1O3(2)\ROOT\30-Mar-2017\0\#M062X\6-31+G(d,p) I NT(grid=ultrafine) OPT IOP(2/17=4) Freq=noraman maxdisk=134217728\NitroxideE.1iii.freq\0,2\C,0.0204427066,-0.0055469042,-0.0074140054\C,0.0241084871,-0.012994323,1.5283367192\C,1.4059758626,-0.0166670414,2.191626121\C,2.2269636122,-1.1703097677,1.6292097791\C,2.3401228156,-1.2304280689,0.0990135556\N,1.0000189908,-1.0072374915,-0.512825057\O,0.8946884508,-1.3114756783,-1.7462725664\C,0.3423669506,1.3773341542,-0.596369492\C,-1.3631568485,-0.4440267818,-0.496542368\H,-0.513498392,-0.9103763336,1.8655877582\H,-0.5491643488,0.8603884291,1.8668266969\H,1.7656136197,-2.1051026439,1.9761210258\H,3.2391339628,-1.1259502705,2.0479353287\C,2.7884074346,-2.6378871819,-0.3046949835\C,3.3427068483,-0.2065857429,-0.4573583125\H,1.2624064457,1.792536849,-0.1866955648\H,-0.4775520843,2.0667661718,-0.3679613401\H,0.4286932989,1.2877461232,-1.6828197866\H,-1.5684949708,-1.4758105158,-0.1962837083\H,-1.423481059,-0.3835112406,-1.5838260598\H,-2.1230435019,0.2107428079,-0.0584139972\H,2.0295474252,-3.3769497215,-0.0310832646\H,3.7212960673,-2.8791900767,0.214134808\H,2.9527793875,-2.6950544806,-1.3813821651\H,3.1541453347,0.7988958682,-0.0829450772\H,3.2885197356,-0.2143867861,-1.5495857581\H,4.3549989361,-0.4948251608,-0.1556524329\C,1.2699008604,-0.1877918197,3.7104440801\O,2.1016115942,1.2014825884,1.9625732962\O,0.6921685063,0.9688780873,4.2986052869\H,0.6958035872,-1.0906796228,3.9533461194\H,2.2705098636,-0.2794290355,4.1437006343\H,1.7478658184,1.8481116252,2.5915446935\H,-0.2678098546,0.9211284108,4.2351217246\Version=ES64L-G09RevD.01\State=2-A\HF=-673.2157384\S2=0.754876\S2-1=0.\S2A=0.750014\RMSD=5.995e-09\RMSF=8.736e-06\Dipole=-0.5440153,-0.0219224,1.2850663\Quadrupole=4.9608005,0.7439893,-5.7047898,-3.4946252,-4.0261861,-5.0450577\PG=C01 [X(C10H20N1O3)]\@

### Nitroxide e.3

1\1\GINC-R290\FOpt\UM062X\6-31+G(d,p)\C10H20N1O3(2)\ROOT\30-Mar-2017\0\#M062X\6-31+G(d,p) I NT(grid=ultrafine) OPT IOP(2/17=4) Freq=noraman maxdisk=134217728\NitroxideE.1iv.freq\0,2\C,-0.0010674274,0.0054460623,0.0147878698\C,-0.0045702113,0.0004516362,1.5495347038\C,1.3630485069,-0.0042121351,2.2245178754\C,2.2053775735,-1.1429340696,1.659230644\C,2.3345357646,-1.1929315317,0.1294605672\N,1.0010636249,-0.9746787708,-0.4939761579\O,0.9184110928,-1.2645258454,-1.7325437978\C,0.2861723309,1.3955760974,-0.5754111324\C,-1.3730433235,-0.4663827319,-0.476829739\H,-0.5313086133,-0.8993043074,1.8919360116\H,-0.5811040329,0.8605465884,1.904903703\H,1.7504345196,-2.0831773031,1.9978561009\H,3.216707855,-1.1138843567,2.0896464906\C,2.8022871359,-2.594251971,-0.2741033076\C,3.3312729057,-0.1598518417,-0.4213298761\H,1.1812771472,1.8472318974,-0.1492459237\H,-0.559697637,2.05684

24101,-0.361255237\H,0.39359277,1.3067492874,-1.6600652002\H,-1.5530994925,-1.5031940979,-0.178006  
245\H,-1.4338360335,-0.4047201201,-1.5641457818\H,-2.1485127058,0.1678379842,-0.0367244538\H,2.055  
0196609,-3.3427886768,0.0046882367\H,3.7411369065,-2.8232143404,0.2399868022\H,2.961003048,-2.6506  
176488,-1.3515403804\H,3.0761441993,0.8579387221,-0.1255597431\H,3.3351503025,-0.2199620656,-1.512  
9686718\H,4.3382401366,-0.3910169843,-0.0568482898\C,1.2093801581,-0.1671986056,3.7426244422\O,1.9  
628656169,1.2802948128,2.0048286515\O,0.4885840209,0.9016186762,4.3060185877\H,0.6644527659,-1.08  
56460125,3.9804431332\H,2.2160881592,-0.2437426354,4.1891975135\H,2.8952357869,1.2353085466,2.255  
4707209\H,0.8457729689,1.7154881094,3.9237876845\Version=ES64L-G09RevD.01\State=2-A\HF=-673.21  
49837\S2=0.754882\S2-1=0.\S2A=0.750014\RMSD=6.156e-09\RMSF=7.567e-06\Dipole=0.9309411,0.045976  
6,0.7264001\Quadrupole=6.5645353,2.8364344,-9.4009697,0.4926969,3.7159322,-4.3370943\PG=C01 [X(C10  
H20N1O3)]\@

### Nitroxide f

1\1\GINC-R2788\FOpt\UM062X\6-31+G(d,p)\C11H18N1O4(2)\ROOT\28-Apr-2016\0\#M062X\6-31+G(d,p)  
INT(grid=ultrafine) OPT IOP(2/17=4) Freq=norman maxdisk=536870912\NitroxideF.2.freq\0,2\C,0.7567387  
732,3.1305593219,-1.0479859379\C,-0.7162593853,2.73991508,-1.1113528479\C,1.6275170175,1.895547892  
4,-0.9144308736\C,1.2478122423,0.9358272535,0.2235570304\C,-1.2118052502,1.8404585259,0.0291167472  
\N,-0.2295660032,0.7411469445,0.2488675827\O,0.9903599386,4.0330103788,0.0533736045\C,1.161987073  
4,4.0190388529,-2.2353414047\H,-0.8608000061,2.2059002507,-2.0597716267\H,-1.3376509308,3.64340591  
57,-1.1494198744\H,2.6728584545,2.1977802716,-0.7840364345\H,1.558090284,1.3559890486,-1.869052122  
7\C,1.7314314294,1.438678849,1.5934286204\C,1.8786432073,-0.4299324396,-0.0599434167\C,-2.52785811  
08,1.18826358,-0.4038884001\C,-1.4429222908,2.6100401301,1.3393764729\O,-0.6437763814,-0.239591864  
2,0.9489257718\H,1.4286345141,2.4663216951,1.7935171727\H,2.8247529663,1.395768307,1.6285761364\H,1  
.3316656351,0.7829059593,2.3714763046\H,1.4574320332,-0.8672195715,-0.9699402835\H,1.6955970602,-1.1  
152760158,0.7681227668\H,2.9580976749,-0.3071805553,-0.1914955414\H,-2.3686849486,0.5340091142,-1.  
2660266584\H,-3.2432229385,1.9696044189,-0.6780297974\H,-2.9444069773,0.5920021209,0.4084765249\H,-  
0.5765833793,3.1977058023,1.6412915657\H,-1.6909430837,1.895276342,2.1286541647\H,-2.2871663523,3.  
295120474,1.2114568682\C,0.9835863278,5.3143814376,-0.3841578986\O,0.9809396012,6.2747384695,0.31  
92205646\O,0.9792813582,5.3415198167,-1.7371569888\H,0.5262409043,3.8842810775,-3.1116409336\H,2.  
2142995427,3.8825431159,-2.5083668576\Version=ES64L-G09RevD.01\State=2-A\HF=-785.3296053\S2=0.  
754857\S2-1=0.\S2A=0.750014\RMSD=5.624e-09\RMSF=1.102e-05\Dipole=0.3059295,-0.8635912,-1.465096  
2\Quadrupole=9.3583678,-16.7643072,7.4059394,-5.8238671,-0.3630764,0.2102603\PG=C01 [X(C11H18N1O  
4)]\@

### Nitroxide g.1 CORE

1\1\GINC-R781\FOpt\UM062X\6-31+G(d,p)\C10H20N1O4S1(2)\ROOT\10-Aug-2017\0\#M062X\6-31+G\*\*  
SCF=Tight INT(grid=ultrafine) OPT IOP(2/17=4) maxdisk=2147483648\NitroxideG.1.a1b2.Methyl.freq\0,2\  
C,0.6765863954,-0.631554675,-0.2613417948\C,1.99295712,-1.2885148225,0.1082051489\C,0.9080877176,0.  
4425073401,-1.3050482573\C,1.8509410342,1.5463816272,-0.807544088\C,2.9991063167,-0.290493563,0.69  
34656018\N,3.0457697015,0.9373225424,-0.154666535\H,2.4053675663,-1.7411414171,-0.802246478\H,1.82  
15282914,-2.0869730275,0.8365732014\H,-0.0425789578,0.899706015,-1.6017547473\H,1.3359926929,-0.03  
63133355,-2.1941684008\C,1.150409288,2.4884487836,0.1850460475\C,2.3503332983,2.3575021639,-2.0046  
159878\C,4.3973976942,-0.9099608945,0.669142486\C,2.6397804256,0.0946241483,2.13755952\O,4.008077  
3504,1.7380522088,0.0824517564\H,0.6585474072,1.9523208801,1.0007692182\H,0.392523311,3.077344850  
5,-0.3409897632\H,1.8884486607,3.1707138042,0.6147945956\H,2.9441580715,1.7260260873,-2.671225888  
3\H,2.9719945675,3.1894324845,-1.6714360474\H,1.4918766094,2.7482334874,-2.5593729699\H,4.7152549  
864,-1.0937729572,-0.3609549514\H,4.3775959183,-1.8617602106,1.2079502387\H,5.1206471189,-0.243922  
0171,1.1414992817\H,1.5992314038,0.4109064724,2.2446443732\H,3.2907116396,0.9088293848,2.46695686  
3\H,2.7922727614,-0.7682113244,2.7923783143\H,0.1811827179,-0.2245789752,0.627833098\O,-0.20241737  
93,-1.6130792419,-0.8700240042\S,-1.2173423737,-2.426282383,0.0868402178\O,-1.5106860161,-3.6584497  
384,-0.6058993829\O,-0.6869964271,-2.4257569163,1.4395878596\C,-2.65643836,-1.3787607621,0.03982952  
12\H,-2.9971406753,-1.3211346058,-0.9933190102\H,-2.3865432127,-0.3961087341,0.4286774352\H,-3.4101  
766641,-1.8460126792,0.6745435278\Version=ES64L-G09RevE.01\State=2-A\HF=-1146.5100138\S2=0.754  
855\S2-1=0.\S2A=0.750014\RMSD=6.807e-09\RMSF=2.437e-06\Dipole=-1.1198003,1.1840279,-0.1387338\Q  
uadrupole=6.0729231,-8.7680716,2.6951485,-12.1994633,0.1273454,-1.7190322\PG=C01 [X(C10H20N1O4S1)  
\@

### Nitroxide g.2 CORE

1\1\GINC-R2203\FOpt\UM062X\6-31+G(d,p)\C10H20N1O4S1(2)\ROOT\10-Aug-2017\0\#M062X\6-31+G\*\*  
SCF=Tight INT(grid=ultrafine) OPT IOP(2/17=4) maxdisk=2147483648\NitroxideG.1.Methyl.freq\0,2\C,1.1



273126442,-0.3077768969,0.0242246295\C,2.0330592593,-0.870405198,-1.0515573013\C,1.4328313081,1.16  
00237711,0.2543810627\C,2.8808227104,1.3907191826,0.7034735715\C,3.5186585653,-0.7555189919,-0.684  
323313\N,3.809417152,0.6148678766,-0.1704480439\H,1.8396490103,-0.3170471794,-1.9792975517\H,1.793  
2736006,-1.9231676655,-1.2333651871\H,0.7540848818,1.5722778013,1.0075188222\H,1.2530445024,1.689  
7579043,-0.6898953224\C,3.0923501331,0.9840136143,2.1706754638\C,3.231035017,2.8701216734,0.53485  
86465\C,4.3643839103,-0.9570445683,-1.9429844565\C,3.9247453255,-1.7971881646,0.3707743392\O,5.044  
1485089,0.9125783109,-0.0674639677\H,2.7268148043,-0.0223152182,2.388525717\H,2.5566835188,1.6808  
153391,2.8220583845\H,4.1588484238,1.028235305,2.4069178598\H,3.1917283311,3.1534315952,-0.520761  
9621\H,4.235010342,3.0724042112,0.9101616271\H,2.5090579041,3.4753516042,1.0909909705\H,4.1699274  
473,-0.1589606056,-2.6650030411\H,4.1073609024,-1.9177403577,-2.3992774716\H,5.4268469486,-0.94904  
09784,-1.6965579442\H,3.2621231521,-1.8007153327,1.2395639496\H,4.9432198411,-1.5882892719,0.70856  
80703\H,3.8995087204,-2.7965268752,-0.0741537387\H,1.2165407222,-0.8901297634,0.9491265992\O,-0.23  
75314128,-0.4410813942,-0.46551711\S,-1.3234050709,-0.8506117512,0.657892909\O,-1.0862691233,-2.224  
331446,1.0624698124\O,-1.3634074951,0.1875353474,1.6736014646\C,-2.7654800025,-0.7593696452,-0.370  
3072162\H,-2.65005304,-1.4717712915,-1.1860405925\H,-2.8634295565,0.2622520739,-0.734672006\H,-3.60  
85618858,-1.0296130146,0.2665623264\Version=ES64L-G09RevE.01\State=2-A\HF=-1146.5113366\S2=0.7  
54856\S2-1=0.\S2A=0.750014\RMSD=3.195e-09\RMSF=2.518e-06\Dipole=-1.0635902,-0.0048081,-1.058331  
7\Quadrupole=1.0317569,-1.0430645,0.0113076,-4.5888518,8.1375028,3.1160159\PG=C01 [X(C10H20N1O4  
S1)]\@

**Nitroxide g.1** 1\1\GINC-R289FOpt\UM062X\6-31+G(d,p)\C16H24N1O4S1(2)\ROOT\20-Jun-2017\0\#M062  
X\6-31+G(d,p) SCF=Tight IOP(2/17=4) INT(grid=ultrafine) Opt maxdisk=2684354560\A1 b2\0,2\C,1.266033  
7865,-0.5659998733,0.1300726236\C,2.046113988,-0.8800336243,-1.1307332122\C,1.4017892944,0.9064427  
571,0.4709435743\C,2.8580283826,1.3070913946,0.7328617931\C,3.5434487672,-0.5811006935,-0.97623483  
24\N,3.7346123575,0.7575067326,-0.3419239792\H,1.6284729116,-0.2787132054,-1.9477545683\H,1.919864  
5957,-1.9351166076,-1.3946041466\H,0.8067503376,1.1559490355,1.3572242467\H,1.0028033043,1.485200  
01,-0.3714546325\C,3.3426695818,0.8027404835,2.102113313\C,2.9808042655,2.830943525,0.6848079137\  
C,4.1924958777,-0.5230699435,-2.3600605692\C,4.2500350278,-1.6514994689,-0.1289876842\O,4.92294138  
94,1.2166020132,-0.3711926443\H,3.1632609777,-0.266309687,2.2453907331\H,2.8131288391,1.340221959  
2,2.8954084504\H,4.4149704369,0.9924308804,2.1987704308\H,2.7373304892,3.2011507439,-0.3149726641\  
H,3.9965124349,3.1429182603,0.9313951068\H,2.2830580019,3.2703780127,1.4041359586\H,3.7765686642,  
0.3043062668,-2.9417997964\H,3.9957561192,-1.4604666602,-2.8887235582\H,5.2701244558,-0.3785006274,-  
2.2729906964\H,3.7445793946,-1.8385800684,0.8217924035\H,5.2747299384,-1.3303583583,0.0755646085\  
H,4.2794765347,-2.5946207689,-0.682660922\H,1.6064345096,-1.2042752349,0.9528761463\O,-0.129531551  
9,-0.8569481183,-0.1299123668\S,-0.9080582373,-1.7900629289,0.9346807849\O,-2.2428930998,-1.9121856  
843,0.3975882292\O,-0.0835437049,-2.9502685275,1.2203596705\C,-0.9314110999,-0.7565018794,2.375790  
0227\C,0.0263618998,-0.9422537614,3.3665361503\C,0.061496001,-0.0546231237,4.4402564719\C,-0.84793  
14582,1.0031966964,4.5301682237\C,-1.8072950569,1.1562168436,3.5190019328\C,-1.8575775765,0.283106  
0247,2.4395823204\C,-0.8254218143,1.9462955921,5.7046537309\H,0.721682618,-1.7732803932,3.29660540  
03\H,0.805894927,-0.1887730936,5.2201438893\H,-2.5233794354,1.9710718638,3.5824428925\H,-2.5970780  
104,0.3961122924,1.6527906489\H,0.1268532107,1.895307871,6.2367861133\H,-1.6203182978,1.692387354  
1,6.4134616317\H,-0.9871139768,2.9786167187,5.3837418567\Version=ES64L-G09RevE.01\State=2-A\HF=  
-1377.4793005\S2=0.75487\S2-1=0.\S2A=0.750014\RMSD=2.072e-09\RMSF=1.881e-06\Dipole=0.0802198,1.3  
297672,1.5685961\Quadrupole=-10.5391232,-2.5257832,13.0649064,-15.8684006,-3.9653112,5.1377706\PG=  
C01 [X(C16H24N1O4S1)]\@

### Nitroxide g.2

1\1\GINC-R3117FOpt\UM062X\6-31+G(d,p)\C16H24N1O4S1(2)\ROOT\29-Apr-2016\0\#M062X\6-31+G(d,  
p) INT(grid=ultrafine) OPT IOP(2/17=4) Freq=norman maxdisk=671088640\NitroxideG.1.freq\0,2\C,0.7924  
557011,3.095549534,-0.6793485785\C,-0.631361586,2.7924709492,-1.0985548977\C,1.5931701108,1.811577  
3628,-0.5736753657\C,1.0052074399,0.8380417005,0.4548526713\C,-1.3520443871,1.8722615948,-0.104517  
7059\N,-0.4696891794,0.7238731751,0.2557016012\H,-0.5975005216,2.3142036108,-2.0856076775\H,-1.200  
3833577,3.7227165897,-1.1975377726\H,2.6292316079,2.0372706663,-0.302157858\H,1.5980536866,1.3401  
572257,-1.5647482185\C,1.2973522593,1.2883910103,1.8952511242\C,1.6009016827,-0.5529383835,0.23097  
6542\C,-2.601494777,1.2927668188,-0.7702031494\C,-1.7612826318,2.6249780727,1.1718969431\O,-1.0388  
693382,-0.2344269062,0.8735630643\H,1.0217150728,2.3298368151,2.0772924966\H,2.3676655253,1.18715  
85823,2.0978853739\H,0.7441619994,0.6523188265,2.5913900086\H,1.3119522123,-0.9378923099,-0.75110  
03748\H,1.2485617055,-1.2493402152,0.9930095651\H,2.6919613811,-0.4876357911,0.2784611311\H,-2.323  
3316473,0.6610936292,-1.6185343216\H,-3.2299299889,2.1127460253,-1.1306443244\H,-3.1695725709,0.68  
94150658,-0.0610323375\H,-0.9343418484,3.1832316748,1.6172109906\H,-2.1363078901,1.9085328686,1.90

75333185\H,-2.5578789295,3.3371381339,0.9361159955\H,0.8078579617,3.6605893201,0.2603664631\O,1.3676693686,3.9290284658,-1.7238905381\S,2.3127492022,5.1284392711,-1.1916915629\O,1.4726326558,6.1071411826,-0.5241365475\O,3.436210606,4.5423184759,-0.4796182852\C,2.8429980807,5.7549774236,-2.7544156436\C,3.9991390376,5.2393981744,-3.3308474351\C,4.4003608287,5.7302229403,-4.5690084529\C,3.6635733061,6.7230580885,-5.2246027415\C,2.5062170602,7.2205289207,-4.6136451225\C,2.0873511495,6.74443626,-3.3763732356\C,4.1244369301,7.27376781,-6.5488733528\H,4.570280647,4.477799534,-2.8098761518\H,5.3014714202,5.33928791,-5.0328546468\H,1.9285961214,7.9934868602,-5.1128715212\H,1.1985885181,7.1323051551,-2.889315857\H,4.737430747,6.5480180524,-7.0879486804\H,4.7282481113,8.1747521522,-6.3979775394\H,3.275226517,7.5457276767,-7.1803673924\Version=ES64L-G09RevD.01\State=2-A\HF=-1377.4776245\S2=0.754863\S2-1=0.\S2A=0.750014\RMSD=3.923e-09\RMSF=3.945e-06\Dipole=0.456008,0.7600506,-1.9871457\Quadrupole=1.3705841,-7.8133459,6.4427618,-5.5604631,-5.7117561,-7.6984885\PG=C01 [X(C16H24N1O4S1)]\@

### Nitroxide h.1

1\I\GINC-R3124\FOpt\UM062X\6-31+G(d,p)\C9H17N4O1(2)\ROOT\28-Apr-2016\0\#M062X\6-31+G(d,p) I NT(grid=ultrafine) OPT IOP(2/17=4) Freq=norman maxdisk=402653184\NitroxideH.1.freq\0,2\C,0.6920780391,2.8649293597,-0.7543561972\C,-0.7546914253,2.4042171311,-0.8936129272\C,1.5988894788,1.6471173524,-0.7281451987\C,1.2900352276,0.6943252492,0.4320195799\C,-1.2109966983,1.5001800598,0.258456892\N,-0.1801296017,0.4534105011,0.5146928461\H,-0.8416889881,1.860792646,-1.8430722467\H,-1.4366120831,3.2625993009,-0.9425545733\H,2.646773147,1.9578083431,-0.6595751399\H,1.4769623833,1.1186984809,-1.6821189614\C,1.7928106251,1.2475132126,1.7752551501\C,1.9555507252,-0.6570513952,0.1644767267\C,-2.4987312777,0.7797765773,-0.1459581664\C,-1.461946319,2.2990589722,1.5473616392\O,-0.5417126228,-0.5004780092,1.2783098363\H,1.4594739078,2.2716017359,1.9609466384\H,2.8870188425,1.2420370682,1.7858539838\H,1.4304793889,0.6102194834,2.5862235017\H,1.5312739529,-1.1199865914,-0.7308467093\H,1.8064564536,-1.3328337849,1.0075539894\H,3.0278902627,-0.5054234014,0.0089765472\H,-2.3150726679,0.1215023743,-0.9996754007\H,-3.2533789762,1.5206800923,-0.4267116223\H,-2.8771779018,0.177044668,0.6806189619\H,-0.6182514275,2.9384807837,1.8183744127\H,-1.6505696022,1.6044387621,2.3701354596\H,-2.3416689833,2.9368954458,1.4174725037\N,1.1131288556,3.6898114751,-1.9141368572\H,0.8216449094,3.458531988,0.1616263123\N,0.5251528965,4.7709268492,-1.9928134274\N,0.0387994787,5.7810952697,-2.1440675532\Version=ES64L-G09RevD.01\State=2-A\HF=-647.0540016\S2=0.754856\S2-1=0.\S2A=0.750014\RMSD=8.227e-09\RMSF=7.541e-06\Dipole=0.1686548,0.2953109,0.1565607\Quadrupole=6.2214473,-6.5683527,0.3469054,-2.7306833,2.3971937,6.8084976\PG=C01 [X(C9H17N4O1)]\@

### Nitroxide h.2

1\I\GINC-R135\FOpt\UM062X\6-31+G(d,p)\C9H17N4O1(2)\ROOT\30-Mar-2017\0\#M062X\6-31+G(d,p) I NT(grid=ultrafine) OPT IOP(2/17=4) Freq=norman maxdisk=134217728\NitroxideH.1ii.freq\0,2\C,1.2017547893,-0.4901050517,0.0087966985\C,0.8430116657,0.8973159402,-0.5109499133\C,0.1557282103,-1.4900875836,-0.470425696\C,-1.2629243547,-1.1509704441,0.0044829835\C,-0.534526445,1.3792314215,-0.0384345486\N,-1.5421010622,0.2957617428,-0.2282848673\H,0.8511488079,0.870730393,-1.6099592273\H,1.5964803897,1.6266473145,-0.1942259202\H,0.4090928085,-2.4979978223,-0.1242034071\H,0.1668877211,-1.5063531624,-1.5696114386\C,-1.4555636904,-1.4776557472,1.4939626273\C,-2.2763460921,-1.9462972839,-0.8207311444\C,-0.9775505731,2.5652877609,-0.8972432512\C,-0.5105932235,1.8047903737,1.4382872942\O,-2.7603078308,0.6485528319,-0.1047686803\H,-0.671631751,-1.0510064893,2.1244398688\H,-1.4472618931,-2.5628847133,1.6340218696\H,-2.4215356729,-1.0882212651,1.826039768\H,-2.2314957867,-1.6466709921,-1.8715556612\H,-3.2895143112,-1.7739982067,-0.4553018336\H,-2.0429781955,-3.0126933789,-0.7467807102\H,-1.1083272768,2.2549268847,-1.9377201827\H,-0.2123714751,3.3461946097,-0.8546339494\H,-1.9239609134,2.9694527629,-0.5357282647\H,-0.0677523195,1.046681238,2.0888583159\H,-1.5327549287,1.9990498686,1.7736745485\H,0.0745839688,2.7233338551,1.5443653326\N,2.5727825022,-0.8916968992,-0.3921152878\H,1.2539275454,-0.4865860972,1.1001400914\N,2.7430654146,-0.9608956174,-1.6122947162\N,3.0023439725,-1.053726243,-2.7100306983\Version=ES64L-G09RevD.01\State=2-A\HF=-647.0538113\S2=0.754847\S2-1=0.\S2A=0.750014\RMSD=6.220e-09\RMSF=3.071e-06\Dipole=0.1823668,-0.0440137,0.4998641\Quadrupole=-8.8043224,6.7863524,2.01797,4.9327781,1.9379777,-0.6618196\PG=C01 [X(C9H17N4O1)]\@

### Nitroxide h.3

1\I\GINC-R3127\FOpt\UM062X\6-31+G(d,p)\C9H17N4O1(2)\ROOT\28-Apr-2016\0\#M062X\6-31+G(d,p) I NT(grid=ultrafine) OPT IOP(2/17=4) Freq=norman maxdisk=402653184\NitroxideH.2.freq\0,2\C,0.8621959795,2.8367247456,-0.8060906464\C,-0.6196759176,2.4701542397,-0.8630953946\C,1.7043722633,1.5748931277,-0.6786042873\C,1.3134202221,0.61590979,0.4567835571\C,-1.1293254597,1.5758227365,0.2761127286\N,-0.1691697487,0.4607876047,0.5042734722\H,-0.7737218078,1.9434365784,-1.8133043356\H,-1.2449222367,3.3712126498,-0.9038342154\H,2.7592182537,1.8440721347,-0.5593400792\H,1.6104578427,1.0375720

457,-1.6303545571\C,1.8312996515,1.0773228357,1.8288122564\C,1.8967456981,-0.7660487479,0.1471448546\C,-2.4583323962,0.950264238,-0.1570090306\C,-1.3485932439,2.3451839111,1.5893189975\O,-0.6016415386,-0.5023533408,1.2184418065\H,1.5658375574,2.1113206444,2.0476903382\H,2.9233079256,1.0013771446,1.8450319022\H,1.4233290454,0.4198956615,2.6014715534\H,1.4490584753,-1.1774129921,-0.7622994301\H,1.7049761889,-1.4566906513,0.9691926423\H,2.9772945193,-0.6746547712,-0.0002210066\H,-2.3130816121,0.3071824051,-1.0298548991\H,-3.1631258799,1.7461358802,-0.417045563\H,-2.8798181494,0.3480394065,0.648423099\H,-0.4428855475,2.8421862196,1.9392587501\H,-1.6813650738,1.6435617445,2.3588527782\H,-2.1263619568,3.1025496258,1.445734864\N,1.2170512807,3.7664474567,0.3005777798\H,1.1321471213,3.3326602021,-1.7488634448\N,0.5308629637,4.7885149485,0.3341111007\N,-0.0609544199,5.7464425263,0.4478744091\Version=ES64L-G09RevD.01\State=2-A\HF=-647.0524\S2=0.754883\S2-1=0.\S2A=0.750014\RMSD=4.927e-09\RMSF=7.994e-06\Dipole=0.3126867,0.3473852,-0.9605378\Quadrupole=4.0060703,-8.2170352,4.2109649,-2.8292479,0.2565108,0.9367557\PG=C01 [X(C9H17N4O1)]\@

#### Nitroxide h.4

1\1\GINC-R56\FOpt\UM062X\6-31+G(d,p)\C9H17N4O1(2)\ROOT\01-Dec-2017\0\#M062X/6-31+G(d,p) SCF=Tight INT(grid=ultrafine) OPT IOP(2/17=4) maxdisk=12GB\RadH1.freq\0,2\C,0.2349049772,-1.2869062862,-0.6731690773\C,1.313207375,-0.479433274,0.0708820517\C,0.743730414,0.7500841567,0.7862238\C,-0.4991773194,1.353048687,0.1255830719\N,-1.5200508981,0.2852086965,-0.0250351816\C,-1.1824080471,-1.1598694202,-0.1026589029\C,-0.1923021884,1.9566433485,-1.2533443047\C,-1.0741376018,2.4360087191,1.0402484261\C,-2.1693783191,-1.8279015307,-1.0611476555\C,-1.3109015584,-1.7927817104,1.2909499842\O,-2.7430276699,0.6289190055,-0.1057879104\H,0.5094353314,-2.3488872437,-0.6944385751\H,0.2088445961,-0.9594482726,-1.7184340746\H,1.5141870425,1.5240143225,0.8636472135\H,0.4895858929,0.4606362005,1.8106282514\H,0.2838607287,1.2362056069,-1.9244075782\H,0.4766647826,2.8163266625,-1.1442575337\H,-1.1239009455,2.2944013086,-1.7153250977\H,-1.3766010393,2.0051717218,1.9989406998\H,-1.9485169701,2.900246315,0.5829008425\H,-0.3119367052,3.2001931314,1.2195505158\H,-2.1581910575,-1.3297356654,-2.0348507513\H,-3.1842384568,-1.7773242872,-0.6653390641\H,-1.8871590329,-2.8766408225,-1.1942519586\H,-0.5639581318,-1.4118656519,1.990737166\H,-1.1790299949,-2.8773714004,1.217848413\H,-2.3093549512,-1.5881029772,1.687277148\N,1.9966665724,-1.2747073503,1.1284608106\H,2.0718431881,-0.1662541566,-0.6588920475\N,2.6442978452,-2.227930677,0.6908277467\N,3.2556921413,-3.1262171563,0.3752735718\Version=ES64L-G09RevD.01\State=2-A\HF=-647.0487763\S2=0.755233\S2-1=0.\S2A=0.750018\RMSD=5.130e-09\RMSF=9.769e-06\Dipole=0.6408357,0.2210586,-0.3746125\Quadrupole=-6.9299864,3.3320136,3.5979729,7.2018833,-2.3202583,0.6658932\PG=C01 [X(C9H17N4O1)]\@

#### Nitroxide i

1\1\GINC-R63\FOpt\UM062X\Gen\C9H17Br1N1O1(2)\ROOT\05-Dec-2016\0\#M062X/gen 6D SCF=Tight INT(grid=ultrafine) OPT IOP(2/17=4) maxdisk=2684354560\NitroxideJ.New.1.freq\0,2\C,0.6699683432,2.8355364942,-0.678005464\C,-0.771648504,2.391571697,-0.8435412278\C,1.5872058754,1.6267026452,-0.6907333649\C,1.2734394513,0.6485239524,0.4527096468\C,-1.225111347,1.4586901911,0.2908521743\N,-0.1958139226,0.4055486875,0.5237116216\H,-0.8638564412,1.8682026819,-1.8031773476\H,-1.4453399595,3.2536734779,-0.8729320577\H,2.6355075547,1.9304404729,-0.6085725479\H,1.467357922,1.1122960286,-1.6521602\C,1.7731294146,1.1753929458,1.8070248131\C,1.9418682471,-0.6953103633,0.156256417\C,-2.5127485659,0.7491190037,-0.1323160702\C,-1.4764707657,2.2290902959,1.5965139553\O,-0.5589777304,-0.5667392431,1.263055715\H,1.4400033732,2.1958726938,2.0116929734\H,2.8672813634,1.1689537544,1.820648078\H,1.4080596223,0.5229487419,2.6045812854\H,1.5193846203,-1.1397064558,-0.7491728589\H,1.7919790064,-1.3889573311,0.9846683605\H,3.0143466725,-0.5392207571,0.0063714737\H,-2.3275894895,0.107692055,-0.998381923\H,-3.265063896,1.4969061228,-0.4004121402\H,-2.8946571135,0.1307053309,0.6810655371\H,-0.6363512399,2.8691399366,1.8771855982\H,-1.6579251798,1.5171079868,2.4059651312\H,-2.3602965459,2.8640192039,1.4820027528\Br,1.1603408239,4.0558369822,-2.1396265619\H,0.8077795423,3.4400050575,0.2202647152\Version=ES64L-G09RevE.01\State=2-A\HF=-3056.8170384\S2=0.75485\S2-1=0.\S2A=0.750014\RMSD=4.319e-09\RMSF=1.626e-05\Dipole=0.0964967,0.3369658,0.1970647\Quadrupole=5.3522629,-5.2812673,-0.0709955,-4.3426665,2.3938028,5.9867062\PG=CS [SG(C1H1Br1N1O1),X(C8H16)]\@

#### Nitroxide k.1

1\1\GINC-R124\FOpt\UM062X\6-31+G(d,p)\C12H20N1O2(2)\ROOT\28-Apr-2016\0\#M062X/6-31+G(d,p) INT(grid=ultrafine) OPT IOP(2/17=4) Freq=noramanmaxdisk=402653184\NitroxideK.2.freq\0,2\C,0.4089588662,2.6688094047,-0.837025816\C,-1.006059974,2.1114728378,-0.8704415329\C,1.4035194738,1.5194747555,-0.678207448\C,1.1617151079,0.6122055497,0.5351276162\C,-1.3907574876,1.212580537,0.3153936129\N,-0.2832222053,0.2585875408,0.6117453203\H,-1.1036645772,1.5298104039,-1.7955474314\H,-1.7215909474,2.938676572,-0.9253774497\H,2.4366914417,1.883663785,-0.639181177\H,1.3278548262,0.9122829161,-1.5894747951\C,1.6047761925,1.2623785487,1.8563547455\C,1.9368437213,-0.693387448,0.3375323895\C,-2.6

089004637,0.3734583518,-0.0816157415\C,-1.7294679289,2.0178295747,1.5804330733\O,-0.575916911,-0.7035022637,1.3952665895\H,1.1428615989,2.2384403547,2.0113439288\H,2.6934465637,1.3867090575,1.8542217795\H,1.3341351875,0.6026024146,2.6852672664\H,1.5624990847,-1.2329915202,-0.53729794\H,1.8329694376,-1.3385601965,1.2106786404\H,2.9959970386,-0.4636220511,0.1847039987\H,-2.35904796,-0.301682378,-0.9054556784\H,-3.4144208011,1.0408816555,-0.4032528037\H,-2.9555101676,-0.2245429807,0.7621388325\H,-0.9473939665,2.732375246,1.8357979206\H,-1.8860225318,1.3241449947,2.4111239347\H,-2.6552146035,2.5778191737,1.4126803493\O,0.4704651727,3.6443233225,0.1955985404\H,0.6114779798,3.1739909707,-1.7965142615\C,1.6755753794,4.3774276929,0.2225027633\C,1.5438432731,5.484496281,1.1723473965\C,1.4587277774,6.3972146169,1.9549909946\H,1.9035075249,4.7738625643,-0.779279127\H,2.5189469678,3.7439699397,0.5330119255\H,1.3742179101,7.204079776,2.6485195839\Version=ES64L-G09RevD.01\State=2-A\HF=-674.1154541\S2=0.754889\S2-1=0.\S2A=0.750014\RMSD=2.644e-09\RMSF=9.566e-06\Dipole=0.6414308,0.9061012,-0.9036011\Quadrupole=2.6658693,-4.9889689,2.3230996,-1.3644843,0.5367101,4.1864835\PG=C01 [X(C12H20N1O2)]\@@

### Nitroxide k.2

1\1\GINC-R65\FOpt\UM062X\6-31+G(d,p)\C12H20N1O2(2)\ROOT\30-Mar-2017\0\#M062X\6-31+G(d,p) I NT(grid=ultrafine) OPT IOP(2/17=4) Freq=noraman maxdisk=134217728\NitroxideK.3.freq\0,2\C,-0.7751637144,-0.6988145725,0.5286239098\C,0.1706086688,-1.5080301727,-0.3507045511\C,-0.740173949,0.7531075717,0.0874487261\C,0.6513371691,1.3872855586,0.1801620221\C,1.6216143748,-1.012491205,-0.2904913234\N,1.6644398572,0.4723025536,-0.4193182669\H,-0.2022343332,-1.4488798087,-1.3814672314\H,0.1676177062,-2.5667887326,-0.0690599661\H,-1.4384570771,1.3416375205,0.6920882182\H,-1.0936928501,0.7906690583,-0.9505919602\C,1.0427789118,1.6991046678,1.6338046638\C,0.6728443042,2.6826931005,-0.6336932922\C,2.402078001,-1.591405453,-1.4724358735\C,2.3102356378,-1.429108949,1.0198882117\O,2.817571644,0.9775004532,-0.6185280298\H,0.919489073,0.8384529314,2.2957900845\H,0.4149317513,2.5103896156,2.0149636857\H,2.0878838408,2.0184067996,1.6660185541\H,0.5032379501,2.4693259941,-1.6927732596\H,1.6352691678,3.1859010196,-0.5314035718\H,-0.1209477812,3.3453393874,-0.2758835598\H,1.9935392922,-1.219593622,-2.416255197\H,2.3194462684,-2.6823444298,-1.4579034563\H,3.454160507,-1.3087437239,-1.4147664456\H,1.7284507638,-1.158970389,1.9047277223\H,3.2884130594,-0.9450391865,1.0838068917\H,2.4532683739,-2.5141357698,1.0280474916\O,-2.1295305351,-1.1131288174,0.4090886496\H,-0.4810918782,-0.7870462293,1.5878878805\C,-2.4173024241,-2.397503849,0.9157495926\C,-2.3001457473,-3.4715935392,-0.0868603167\C,-2.2312167443,-4.3634402841,-0.8964854533\H,-3.4507366815,-2.3679170879,1.2734874642\H,-1.7726255532,-2.6285078549,1.7767038003\H,-2.1693065742,-5.1455025554,-1.620275814\Version=ES64L-G09RevD.01\State=2-A\HF=-674.1165814\S2=0.754869\S2-1=0.\S2A=0.750014\RMSD=2.153e-09\RMSF=4.553e-06\Dipole=-0.5911167,-0.6682355,0.6290382\Quadrupole=-7.493778,4.3569638,3.1368142,-3.5537555,0.4681077,2.8231365\PG=C01 [X(C12H20N1O2)]\@@

### Nitroxide k.3

1\1\GINC-R66\FOpt\UM062X\6-31+G(d,p)\C12H20N1O2(2)\ROOT\30-Mar-2017\0\#M062X\6-31+G(d,p) I NT(grid=ultrafine) OPT IOP(2/17=4) Freq=noraman maxdisk=134217728\NitroxideK.3i.freq\0,2\C,-0.6494301198,-0.8085444249,0.6275332757\C,0.2896714248,-1.587985811,-0.2847793026\C,-0.7306347895,0.6270450042,0.1428567958\C,0.6231441626,1.3442482344,0.1446025823\C,1.7101204894,-1.0086902735,-0.3124046504\N,1.6564348549,0.4715774253,-0.4843331101\H,-0.1354450392,-1.5775755691,-1.2975318455\H,0.3746874365,-2.6344260624,0.0312578595\H,-1.430430919,1.1897745359,0.7698743448\H,-1.1394579895,0.6149739271,-0.8755424375\C,1.0712249633,1.7201494551,1.5662476383\C,0.5263572486,2.6138104833,-0.7035802495\C,2.4666913849,-1.5757448398,-1.5152158181\C,2.480483836,-1.3469134031,0.974980486\O,2.7654850811,1.0360267525,-0.7598478663\H,1.0337236995,0.8733744559,2.2557467288\H,0.4170194296,2.5043623087,1.959475353\H,2.0956759695,2.1006285954,1.5329863979\H,0.3139729516,2.3600317347,-1.7459659067\H,1.4616997139,3.1739914561,-0.6670729393\H,-0.2849375858,3.2403217385,-0.3208554047\H,1.9930489704,-1.2567992255,-2.4480199881\H,2.4517285495,-2.6688472276,-1.4669015737\H,3.5014172776,-1.2303044986,-1.5169296834\H,1.9184135778,-1.0969983503,1.8781278045\H,3.4263328191,-0.7986752674,0.9842979883\H,2.6946073715,-2.4199322295,1.0001231528\O,-1.9811829789,-1.3082087251,0.5974300087\H,-0.2883497876,-0.8460941389,1.6652355197\C,-2.1440204488,-2.6480760988,1.0093505969\C,-1.5513715614,-2.9429536838,2.3261125566\C,-1.0513570299,-3.1925252546,3.3957956685\H,-1.7262659748,-3.3439236971,0.2690250363\H,-3.2229775995,-2.816250092,1.050163358\H,-0.6201093883,-3.4136672339,4.3470476235\Version=ES64L-G09RevD.01\State=2-A\HF=-674.1184909\S2=0.754869\S2-1=0.\S2A=0.750014\RMSD=1.616e-09\RMSF=4.378e-06\Dipole=-0.5359111,-0.7773538,0.551236\Quadrupole=-5.898636,3.0878456,2.8107904,-3.261846,3.9449332,1.2394896\PG=C01 [X(C12H20N1O2)]\@@

### Nitroxide k.5

I\1\GINC-R39\FOpt\UM062X\6-31+G(d,p)\C12H20N1O2(2)\ROOT\03-Dec-2017\0\#M062X\6-31+G(d,p) S  
CF=Tight INT(grid=ultrafine) OPT IOP(2/17=4) maxdisk=12GB\RadK5.freq\0,2\C,-0.0488279775,-1.193484  
5117,-1.0955689519\C,1.1343747618,-0.2618015141,-0.7845382484\C,0.749190944,0.8885210507,0.1483844  
532\C,-0.7058152668,1.3503017826,0.0354282863\N,-1.5908971412,0.1742452681,0.2258100204\C,-1.15394  
91184,-1.2222756194,-0.0315750366\C,-1.0079127852,1.9893644748,-1.3285082665\C,-1.0020680728,2.3562  
389384,1.1489990515\C,-2.3534564764,-2.0010860319,-0.5734834845\C,-0.676714948,-1.8629009598,1.2808  
649078\O,-2.7866235508,0.3779265862,0.612729442\H,0.3205200189,-2.2169406794,-1.227265513\H,-0.502  
413939,-0.9017747313,-2.0499382248\H,1.4082744153,1.7449620923,-0.0269327201\H,0.9369369895,0.5561  
724002,1.1743643442\H,-0.7559674391,1.3242279569,-2.1595800013\H,-0.4340703261,2.9145982776,-1.443  
5821514\H,-2.0733192251,2.2276679347,-1.38855014\H,-0.8685892152,1.8898875066,2.1293177396\H,-2.02  
89254434,2.7167314655,1.0782104091\H,-0.3150128556,3.2034654674,1.0633650603\H,-2.7691640938,-1.50  
43769437,-1.4549415075\H,-3.1397143239,-2.0720603691,0.178969889\H,-2.0301197652,-3.0087710015,-0.8  
516948754\H,0.2483095405,-1.4152323884,1.6491339353\H,-0.4880720517,-2.9296245781,1.1217643821\H,-  
1.4577439708,-1.7548394419,2.0387712653\O,2.1978289423,-0.9455434493,-0.1274236389\H,1.5192757301,  
0.142022271,-1.73438417\C,4.0418406377,-2.395545917,-0.2432563314\C,4.8903644556,-2.9982557291,0.36  
45983077\H,5.6384170354,-3.5279157282,0.9113509387\C,3.0226607757,-1.6756694132,-1.0094230305\H,3.  
5119790201,-0.9936032089,-1.7214491771\H,2.4385247191,-2.4007012569,-1.5951069631\Version=ES64L-  
G09RevD.01\State=2-A\HF=-674.1108118\S2=0.755241\S2-1=0.\S2A=0.750018\RMSD=8.339e-09\RMSF=3.  
822e-06\Dipole=0.9808451,-0.1439605,-0.8821749\Quadrupole=-6.7890076,4.5699832,2.2190243,0.765502,1.  
7741145,-1.063287\PG=C01 [X(C12H20N1O2)]\@

### Nitroxide k.6

I\1\GINC-R38\FOpt\UM062X\6-31+G(d,p)\C12H20N1O2(2)\ROOT\09-Dec-2017\0\#M062X\6-31+G(d,p) S  
CF=Tight INT(grid=ultrafine) OPT IOP(2/17=4) maxdisk=5GB\RadK3.freq\0,2\C,-0.6692793063,0.99572914  
35,-0.0432232585\C,-1.0759874879,-0.2311535136,0.7752984839\C,0.0635803872,-1.2520679557,0.9204193  
8\C,1.1168188078,-1.2196126154,-0.194406051\N,1.6193393311,0.17262751,-0.3220924803\C,0.813782318,  
1.3644181549,0.045229907\C,0.5472179355,-1.6842190179,-1.5435587745\C,2.2940088431,-2.1137965088,0.1  
980159938\C,1.1177225503,2.4746224738,-0.9620089689\C,1.2141956582,1.8254765017,1.4548840951\O,2.  
8015757608,0.3551929475,-0.7581024522\H,-1.2703447722,1.8583554995,0.2622624204\H,-0.9212370365,0.  
7949606751,-1.0896727881\H,-0.3571520101,-2.2635464369,0.9611546528\H,0.574995194,-1.0923103504,1.  
8766437233\H,-0.3631006264,-1.1462502951,-1.8151456326\H,0.3022645764,-2.7502665685,-1.4919895805\  
H,1.300281711,-1.5358348231,-2.3226660912\H,2.774826149,-1.7403530397,1.1067648997\H,3.0412695688,  
-2.1395427069,-0.5959633825\H,1.9279962204,-3.1287891098,0.3806342574\H,0.9148468813,2.1314303003,  
-1.9805566668\H,2.1654588711,2.771691315,-0.9033316103\H,0.484007156,3.3402806445,-0.7471161876\H,  
0.9598095758,1.0844883688,2.2180646992\H,0.7013141846,2.7606599675,1.7017159238\H,2.2934565676,1.  
9980228395,1.4868176933\O,-2.2043639372,-0.7836113922,0.0959359825\H,-1.3980595065,0.082731852,1.7  
780769212\C,-3.7503430079,-0.8054659653,1.9382460761\C,-4.3261212025,-0.1747556274,2.7907203701\H,  
-4.841747457,0.3842951653,3.5398165178\C,-3.0436377828,-1.5793301537,0.9012029364\H,-2.4839856492,-  
2.3933965406,1.3844174153\H,-3.7721484655,-2.0332707382,0.2250315761\Version=ES64L-G09RevD.01\S  
tate=2-A\HF=-674.1132409\S2=0.755244\S2-1=0.\S2A=0.750018\RMSD=6.839e-09\RMSF=5.821e-06\Dipole  
=-1.0266715,-0.2769777,0.8356957\Quadrupole=-7.16073,5.5059778,1.6547522,-1.3782657,0.4018852,1.9142  
461\PG=C01 [X(C12H20N1O2)]\@

### Nitroxide l.1

I\1\GINC-R159\FOpt\UM062X\6-31+G(d,p)\C12H20N1O3(2)\ROOT\16-Jul-2017\0\#M062X\6-31+G(d,p) S  
CF=Tight INT(grid=ultrafine) OPT IOP(2/17=4) maxdisk=12GB\NitroxideL.1iii.freq\0,2\C,-0.4825903787,0.  
0005073515,0.9104748891\C,-0.0365695088,-1.2388254193,0.1603870152\C,-0.0413171331,1.2417565009,0.  
1521548669\C,1.4818151858,1.3217441288,-0.0048238325\C,1.487182685,-1.3121555319,0.0004477644\N,2.  
0120175376,0.004675296,-0.4648124105\H,-0.508855118,-1.2276064256,-0.8300317655\H,-0.3787769645,-2.  
141137799,0.678643483\H,-0.3862890357,2.1432546817,0.6680739976\H,-0.511068803,1.2142376037,-0.839  
6113981\C,2.1662088836,1.72036845,1.3126316423\C,1.826647313,2.3494984601,-1.0840208604\C,1.83273  
86393,-2.3435806582,-1.0752033421\C,2.1800940429,-1.7023038953,1.316041991\O,3.2214643377,0.004577  
9375,-0.8662139228\H,1.8413842623,1.1091472733,2.1578889509\H,1.9274596113,2.7623448275,1.5453689  
885\H,3.2493465291,1.622416464,1.2009765023\H,1.4387939397,2.0281604501,-2.0548206422\H,2.9073258  
553,2.4725180531,-1.1666985988\H,1.3733103938,3.3102465596,-0.8224517222\H,1.4399405954,-2.0279772  
943,-2.0458432929\H,1.3846768795,-3.3055257073,-0.808364421\H,2.9135815457,-2.4618965393,-1.161335  
4414\H,1.8662109798,-1.0806064807,2.1579053424\H,3.2622972395,-1.6061052863,1.1950657209\H,1.9445  
665493,-2.743212788,1.5582931691\O,-1.9190466171,-0.0522649724,0.9786078269\H,-0.1024140368,0.0144  
160177,1.9367431493\C,-2.5041061177,0.7085287248,1.922335626\O,-1.8906907032,1.4068643841,2.697368  
6821\C,-3.983469906,0.5660651733,1.8797086789\C,-4.7412752592,1.2393704496,2.742792634\H,-4.392805

4098,-0.0989782233,1.1266014299\H,-4.278766006,1.892422435,3.4773603432\H,-5.822252008,1.153325798  
7,2.7345189563\\Version=ES64L-G09RevD.01\State=2-A\HF=-749.3962717\S2=0.754864\S2-1=0.\S2A=0.75  
0014\RMSD=5.237e-09\RMSF=2.232e-05\Dipole=-1.2188467,-0.3191326,0.1676962\Quadrupole=1.059591,2.  
711531,-3.771122,0.0809178,3.3605803,-1.4940033\PG=C01 [X(C12H20N1O3)]\@

### Nitroxide I.2

1\1\GINC-R182\FOpt\UM062X\6-31+G(d,p)\C12H20N1O3(2)\ROOT\16-Jul-2017\0\#M062X\6-31+G(d,p) S  
CF=Tight INT(grid=ultrafine) OPT IOP(2/17=4) maxdisk=12GB\NitroxideL.1iv.freq\0,2\C,-0.4686244401,-0.  
0356342724,0.9264617244\C,-0.0133434849,-1.2668374424,0.1685303798\C,-0.050396138,1.2133530634,0.1  
678834529\C,1.469957318,1.3138934574,-0.0027228574\C,1.5098517007,-1.3199093237,-0.0051631309\N,2.  
013082658,0.0050416527,-0.4715843055\H,-0.4938100606,-1.2587537632,-0.818118551\H,-0.3389919477,-2.  
175113397,0.6871773085\H,-0.401747451,2.1090383129,0.6896272724\H,-0.5290318882,1.1831062682,-0.81  
9550314\C,2.1609298788,1.7178743057,1.3096915346\C,1.7917760101,2.348850422,-1.0821637893\C,1.859  
1715137,-2.3437534215,-1.0868706203\C,2.2198640684,-1.7044017869,1.3028964973\O,3.2187359129,0.021  
7071745,-0.884077822\H,1.849087268,1.1027141698,2.1570282886\H,1.9134151325,2.7570847618,1.545715  
6996\H,3.2441095806,1.6312403505,1.1892897077\H,1.3994426093,2.0250012796,-2.0503628788\H,2.87005  
20407,2.4859152422,-1.1740444867\H,1.3284647382,3.3029584536,-0.8138831197\H,1.4535327889,-2.03071  
10451,-2.0530806962\H,1.426533993,-3.3124258482,-0.8187978431\H,2.9406929537,-2.4473401225,-1.1831  
243352\H,1.9076775681,-1.0876172461,2.1489898559\H,3.2996474402,-1.5956750015,1.1712588276\H,1.99  
8663861,-2.74834572,1.5456786\O,-1.9034706975,-0.1077942151,1.008364976\H,-0.0780263009,-0.0205848  
88,1.9486824426\C,-2.4876306198,0.6447034047,1.9588947282\O,-1.8715488226,1.3456853026,2.730346036  
8\C,-3.9682138576,0.526381894,1.9706900466\C,-4.6564377839,-0.2304281335,1.1174505323\H,-4.4474937  
311,1.1195710458,2.7425026525\H,-4.1516441323,-0.813189516,0.3538992549\H,-5.7390276784,-0.2818954  
181,1.1656549308\\Version=ES64L-G09RevD.01\State=2-A\HF=-749.3954415\S2=0.754865\S2-1=0.\S2A=0.  
750014\RMSD=6.123e-09\RMSF=3.798e-06\Dipole=-1.194034,-0.5270306,-0.0634169\Quadrupole=1.583244,  
2.9318391,-4.5150831,1.7296145,5.4898612,-2.2083402\PG=C01 [X(C12H20N1O3)]\@

### Nitroxide I.3

1\1\GINC-R237\FOpt\UM062X\6-31+G(d,p)\C12H20N1O3(2)\ROOT\28-Apr-2016\0\#M062X\6-31+G(d,p) I  
NT(grid=ultrafine) OPT IOP(2/17=4) Freq=noramanmaxdisk=536870912\NitroxideL.2i.freq\0,2\C,0.6988669  
812,2.5702415366,-0.7475007865\C,-0.7750218883,2.1935807225,-0.8148266754\C,1.5601764007,1.3292335  
196,-0.5919510447\C,1.1705796985,0.3831577555,0.5547431453\C,-1.2827192959,1.3071137991,0.33049464  
47\N,-0.3094944112,0.2088114375,0.5906201993\H,-0.9133448831,1.6538823027,-1.7604297912\H,-1.38994  
36137,3.0970527523,-0.8713564195\H,2.6099695303,1.6162694282,-0.4674532295\H,1.4849549336,0.77748  
12182,-1.5371990297\C,1.6641194193,0.8788870043,1.9240459805\C,1.7788961341,-0.9950623992,0.279296  
2145\C,-2.5970669869,0.6528309354,-0.1044721391\C,-1.5273430491,2.0963865298,1.6274771497\O,-0.734  
0452334,-0.7463658245,1.3205514478\H,1.3590438754,1.9053016693,2.1271754045\H,2.7579576996,0.8389  
751204,1.9500007194\H,1.2707681002,0.2200458001,2.7029386692\H,1.3522186586,-1.427611262,-0.63035  
87949\H,1.583144488,-1.6749468309,1.1093262886\H,2.8603802075,-0.8906330046,0.1475861408\H,-2.4307  
08162,-0.0091883312,-0.9592035538\H,-3.3069178509,1.433281644,-0.3951528055\H,-3.0231315252,0.0651  
348557,0.709486627\H,-0.6431302964,2.6448356777,1.9537732807\H,-1.8267881721,1.401100218,2.416485  
8935\H,-2.3368978372,2.816017887,1.4673012698\O,0.9808084326,3.4536559327,0.3579573934\H,0.971465  
6826,3.1025530461,-1.6639532517\C,0.6249939036,4.7430280887,0.2088918533\O,0.114169613,5.18805471  
88,-0.7933567233\C,0.9430404553,5.5246560269,1.4332179112\C,0.6511811654,6.8224778628,1.489356753  
3\H,1.4099622197,4.9885226933,2.2534309653\H,0.1837486407,7.310978506,0.6391334278\H,0.8700369656,7  
.4147589632,2.3709628651\\Version=ES64L-G09RevD.01\State=2-A\HF=-749.3946071\S2=0.754887\S2-1=0.\  
S2A=0.750014\RMSD=5.505e-09\RMSF=8.376e-06\Dipole=0.631975,0.7803638,0.0192756\Quadrupole=2.60  
60033,-3.9270687,1.3210654,-2.3128759,1.0896476,9.417889\PG=C01 [X(C12H20N1O3)]\@

### Nitroxide I.4

1\1\GINC-R224\FOpt\UM062X\6-31+G(d,p)\C12H20N1O3(2)\ROOT\28-Apr-2016\0\#M062X\6-31+G(d,p) I  
NT(grid=ultrafine) OPT IOP(2/17=4) Freq=noramanmaxdisk=536870912\NitroxideL.2ii.freq\0,2\C,0.5970298  
526,2.6003129846,-0.6996510061\C,-0.8492540992,2.1423307449,-0.8329527932\C,1.5189145947,1.4067775  
828,-0.5228049059\C,1.1353820684,0.4215650071,0.5925231423\C,-1.3530568891,1.2140708439,0.27998796  
05\N,-0.3324608811,0.1655423938,0.565071906\H,-0.9165367071,1.6079866186,-1.7893393583\H,-1.512317  
4356,3.0096340596,-0.9065482272\H,2.545089829,1.7491561791,-0.3504212272\H,1.5142101602,0.8666679  
103,-1.477696143\C,1.5393546441,0.9217063696,1.9886181325\C,1.8328842277,-0.9150268387,0.324371490  
4\C,-2.6111039202,0.4947004521,-0.2146183554\C,-1.69260977,1.9730178339,1.5739075651\O,-0.73216482  
91,-0.8220888022,1.265075288\H,1.1322578132,1.9099925995,2.2014773768\H,2.6308124758,0.9790321911,  
2.053884432\H,1.1777653366,0.2135553966,2.7390226299\H,1.4745440942,-1.3531080645,-0.6117181181\H,1

.6370142089,-1.620572505,1.1326321321\H,2.9117601656,-0.7482710205,0.246088781\H,-2.3742775425,-0.1489130482,-1.0667804796\H,-3.3494162516,1.2388648805,-0.5284384612\H,-3.0381262987,-0.1231912767,0.5762227276\H,-0.8628010942,2.5847360211,1.9302972974\H,-1.9650787588,1.252145057,2.3497002049\H,-2.5473894582,2.6327564007,1.3922131264\O,0.7877241517,3.4855375976,0.4247495285\H,0.8765720965,3.1569246968,-1.5993390399\C,0.3551490194,4.7504810032,0.2720970888\O,-0.155182275,5.1663777602,-0.7437381949\C,0.5646893494,5.5887773227,1.4803919793\C,1.1504199858,5.1510809656,2.5940005857\H,0.1957530999,6.6038941833,1.3768412346\H,1.5197586347,4.1333404516,2.672398346\H,1.2787104022,5.8037560482,3.4510033542\Version=ES64L-G09RevD.01\State=2-A\HF=-749.3943255\S2=0.754888\S2-1=0.\S2A=0.50014\RMSD=6.185e-09\RMSF=1.299e-05\Dipole=0.7249545,0.5652729,0.1817763\Quadrupole=3.7719582,-7.0602189,3.2882607,-1.460256,1.0732458,9.5819572\PG=C01 [X(C12H20N1O3)]\@

### Nitroxide l.5

1\1\GINC-R166\FOpt\UM062X\6-31+G(d,p)\C12H20N1O3(2)\ROOT\01-Dec-2017\0\#M062X/6-31+G(d,p) SCF=Tight INT(grid=ultrafine) OPT IOP(2/17=4) maxdisk=12GB\RadL1.freq\0,2\C,-0.1106290447,0.6112446313,1.0451305375\C,0.6115067558,-0.4740402528,0.2381560476\C,-0.3023979531,-1.2027336905,-0.7478426815\C,-1.7653177524,-1.2923208639,-0.3016141415\N,-2.2548033771,0.0792178024,-0.0125764576\C,-1.358705883,1.1986825268,0.3770437998\C,-1.9382240476,-2.1650486601,0.9509006345\C,-2.6027729011,-1.86728875,-1.4449752791\C,-2.1028717286,2.0738835049,1.3866227499\C,-1.0139622071,2.0308989157,-0.8675917359\O,-3.5054516718,0.3022942197,-0.096227009\H,0.5922609847,1.4197199877,1.268245621\H,-0.4024954345,0.1896021948,2.0131104803\H,0.073952455,-2.2147082271,-0.9295055962\H,-0.2633291798,-0.6756842457,-1.7064978676\H,-1.3101506533,-1.8279071145,1.7801459842\H,-1.6756319237,-3.2030514798,0.7225280538\H,-2.9824456529,-2.1308804734,1.2731607667\H,-2.5568337722,-1.2119013164,-2.3194765553\H,-3.6468240412,-1.9640313319,-1.1454258156\H,-2.2129951691,-2.8523737093,-1.7185310812\H,-2.4414441062,1.4756974765,2.2374258695\H,-2.9765645802,2.536747797,0.9263884671\H,-1.4288583279,2.8560595885,1.7486110855\H,-0.4004423209,1.4748215111,-1.5800668478\H,-0.4563911638,2.9251804911,-0.5705881876\H,-1.9388201652,2.3423697422,-1.3611528734\O,1.6651911197,0.0950797045,-0.5693097311\H,1.08280061,-1.172716795,0.934580579\C,2.8039483481,0.4177064611,0.0708121214\O,2.9731291348,0.2599799764,1.2588023301\C,3.803707811,0.985259343,-0.8721616817\C,4.9974909872,1.3682932256,-0.4240594116\H,3.5096831348,1.0648656265,-1.9134696728\H,5.2405982753,1.265883571,0.6296945707\H,5.745453441,1.7846186126,-1.089807072\Version=ES64L-G09RevD.01\State=2-A\HF=-749.3911219\S2=0.755238\S2-1=0.\S2A=0.750018\RMSD=4.667e-09\RMSF=6.793e-06\Dipole=1.0490068,-0.1320037,-0.4997303\Quadrupole=-5.4155795,5.0012405,0.4143391,4.7020335,-5.5341644,-0.2057908\PG=C01 [X(C12H20N1O3)]\@

### Nitroxide l.6

1\1\GINC-R170\FOpt\UM062X\6-31+G(d,p)\C12H20N1O3(2)\ROOT\01-Dec-2017\0\#M062X/6-31+G(d,p) SCF=Tight INT(grid=ultrafine) OPT IOP(2/17=4) maxdisk=12GB\RadL4.freq\0,2\C,-0.35234564,-0.8822953034,-0.5519071225\C,0.7005537199,-0.3295525292,0.4070936696\C,1.2463942233,-1.3820776586,1.3807939454\C,0.2623013044,-2.5095954547,1.7111598248\N,-0.2207213419,-3.1129981626,0.443046145\C,-0.2424439934,-2.3821359504,-0.8500858663\C,-0.9426868278,-2.0057876964,2.5204318682\C,0.9932310553,-3.5926878006,2.5064299794\C,-1.4787600608,-2.8300278193,-1.6306832549\C,1.0232152389,-2.7270051425,-1.6490078799\O,-0.6445015623,-4.3133352392,0.4688389833\H,-0.2945211698,-0.3259200616,-1.4931173984\H,-1.3459636794,-0.6913550629,-0.1325073599\H,1.5612951778,-0.8981867296,2.3093720579\H,2.143448079,-1.8259503274,0.9342956215\H,-1.4596393221,-1.1804749773,2.0228529251\H,-0.6117083756,-1.6572055412,3.5037535825\H,-1.6533353148,-2.8252068973,2.6585464102\H,1.8019862095,-4.0245821774,1.9099916566\H,0.3078917157,-4.3943204414,2.7839923798\H,1.4177945018,-3.149932639,3.4122703844\H,-2.384825115,-2.675662782,-1.0375777355\H,-1.4132675602,-3.8891171735,-1.8821075011\H,-1.5530733937,-2.2448125765,-2.5522892095\H,1.9296305767,-2.3562670305,-1.1657128835\H,0.966445045,-2.2773088496,-2.6455854359\H,1.0956953433,-3.81289632,-1.7562228485\O,1.78327552,0.1816914001,-0.402793832\H,0.2895777813,0.5196516568,0.9611929613\C,2.6334926637,1.0281914877,0.2057721899\O,2.5296593434,1.3646193039,1.3636869417\C,3.6940807714,1.4858660519,-0.7305898416\C,4.6335903228,2.3299048004,-0.3093159359\H,3.6563368405,1.1012702438,-1.7444098911\H,4.6244416,2.6839612907,0.7175878444\H,5.4185063232,2.6799321088,-0.9706553747\Version=ES64L-G09RevD.01\State=2-A\HF=-749.3913538\S2=0.755241\S2-1=0.\S2A=0.750018\RMSD=9.447e-09\RMSF=1.000e-05\Dipole=0.4456935,0.9382995,-0.5644039\Quadrupole=4.7981923,-8.1549147,3.3567225,-1.6737626,-2.7514454,-3.6926495\PG=C01 [X(C12H20N1O3)]\@

### Nitroxide m.1

1\1\GINC-R125\FOpt\UM062X\6-31+G(d,p)\C10H18N1O3(2)\ROOT\13-Jul-2017\0\#M062X/6-31+G\*\* SCF=Tight INT(grid=ultrafine) OPT IOP(2/17=4) maxdisk=1610612736\NitroxideM.li.freq\0,2\C,-2.1233100453,-0.0146012816,0.8491445535\C,-1.5899251663,1.2358475825,0.1428014418\C,-1.5441535798,-1.2467054488,0.146594488\C,-1.9489426562,-1.331247231,-1.3300577001\C,-1.9974739913,1.3009027815,-1.3340785722\N,

-1.7334113618,-0.0117568096,-1.9902971514\H,-0.4959160981,1.2351403985,0.2171680376\H,-1.951666062,2.1462928597,0.6347312679\H,-1.8721331073,-2.1683502158,0.6413284082\H,-0.4509165252,-1.2054422333,0.2208973815\C,-3.4169061262,-1.7534136563,-1.4966666256\C,-1.0489557747,-2.3449172978,-2.0398671552\C,-1.1354261333,2.3448861272,-2.0470342249\C,-3.4799921949,1.6681572989,-1.5018995908\O,-1.7989382395,-0.0149111154,-3.2631037155\H,-4.1000325917,-1.148157173,-0.8958780301\H,-3.5341091717,-2.7977182417,-1.1910921258\H,-3.701299714,-1.661317482,-2.5481851971\H,-0.0092437853,-2.0059159135,-2.0273328094\H,-1.3582337421,-2.4736682618,-3.0778823813\H,-1.1131972069,-3.3072867157,-1.5230431603\H,-0.08392482,2.0444824121,-2.0335210174\H,-1.2351286457,3.3058076726,-1.5331489537\H,-1.4491796753,2.4589776861,-3.0854209691\H,-4.1403815397,1.0399612657,-0.8992390544\H,-3.760731418,1.5624394017,-2.5531189229\H,-3.635631548,2.7083575514,-1.1995015977\H,-3.2167196164,-0.0348155745,0.8290308889\C,-1.7595378354,-0.0057785101,2.3149346861\O,-2.5437028072,-0.0192445381,3.2319827645\O,-0.4236764401,0.020083893,2.5108942575\H,-0.2715843801,0.0243507691,3.4685297797\Version=ES64L-G09RevE.01\State=2-A\HF=-672.0400847\S2=0.754859\S2-1=0.\S2A=0.750014\RMSD=6.732e-09\RMSF=1.612e-05\Dipole=0.3358191,0.0073149,0.5696553\Quadrupole=2.3486268,6.3936681,-8.7422949,-0.0651166,6.8802451,0.1071123\PG=C01 [X(C10H18N1O3)]\@

### Nitroxide m.2

1\1\GINC-R53\FOpt\UM062X\Gen\C10H18N1O3(2)\ROOT\14-Dec-2016\0\#M062X/gen 6D SCF=Tight INT (grid=ultrafine) OPT IOP(2/17=4) maxdisk=1610612736\NitroxideM.1ii.freq\0,2\C,1.2691133857,0.0753384466,0.2868221521\C,0.5530420014,1.2878725707,-0.2919017839\C,0.6100675497,-1.2000779622,-0.253116339\C,-0.8756206324,-1.2998959862,0.1126017993\C,-0.9350221573,1.3320493453,0.0711020064\N,-1.5572739234,-0.0032996653,-0.1646857527\H,0.6634756891,1.2639630197,-1.3827638587\H,1.0229367269,2.2162661514,0.0492086642\H,1.1198462259,-2.0909921696,0.1272719434\H,0.7096025514,-1.2026556197,-1.3468590643\C,-1.0710953879,-1.6754751192,1.5897051558\C,-1.5395325551,-2.3593469425,-0.7693742914\C,-1.6480954256,2.3303769181,-0.8429836445\C,-1.1526774535,1.7435727193,1.5358866671\O,-2.8310168224,-0.0335457709,-0.1304669663\H,-0.4980527194,-1.036146407,2.2658638731\H,-0.7506267175,-2.7094133736,1.7502891068\H,-2.1306433933,-1.5917292171,1.8454860716\H,-1.5067834718,-2.0557824958,-1.8195483011\H,-2.5825306354,-2.4998221848,-0.4828981344\H,-1.0044651262,-3.3073941762,-0.6583024432\H,-1.5991971189,1.9961377582,-1.8831060489\H,-1.1569013211,3.3047924885,-0.7627744639\H,-2.6968223089,2.4316867096,-0.5607118976\H,-0.55339654,1.1519532856,2.2326365884\H,-2.2081346201,1.6213933014,1.7932857038\H,-0.8788191738,2.7952882049,1.6642029725\H,1.2222540583,0.0701214509,1.3836065471\C,2.7371412882,0.0914393975,-0.0725181619\O,3.2759990235,0.8774966519,-0.8123105891\O,3.4111458281,-0.9101792616,0.5308362555\H,4.3365131759,-0.8489920682,0.2476362335\Version=ES64L-G09RevE.01\State=2-A\HF=-672.0413103\S2=0.754856\S2-1=0.\S2A=0.750014\RMSD=1.338e-09\RMSF=9.054e-06\Dipole=0.8318481,-0.4211629,0.5534267\Quadrupole=-4.9352156,3.867389,1.0678267,-4.1682758,1.4554874,1.9454649\PG=C01 [X(C10H18N1O3)]\@

### Nitroxide m.3

1\1\GINC-R243\FOpt\UM062X\6-31+G(d,p)\C10H18N1O3(2)\ROOT\01-Dec-2017\0\#M062X/6-31+G(d,p) SCF=Tight INT(grid=ultrafine) OPT IOP(2/17=4) maxdisk=12GB\RadM2.freq\0,2\C,0.1827076103,-1.4366451248,0.5916480628\C,0.417718924,0.0413274964,0.2102107941\C,0.0958397973,1.0088408009,1.3683313032\C,-1.1454164367,0.5971662053,2.1654264564\N,-0.9460388188,-0.7804041103,2.6787361421\C,0.0228368202,-1.7402886272,2.0913780589\C,-2.4147279102,0.6181637387,1.3028012671\C,-1.3103482477,1.5385575336,3.3595765011\C,-0.5581788727,-3.1483631806,2.2399876864\C,1.3469412109,-1.6612929598,2.8664353068\O,-1.6357000307,-1.1481394339,3.6839227273\H,0.9948239463,-2.0635798543,0.211227936\H,-0.7324612319,-1.7731861938,0.0926550243\H,-0.0595154194,2.0147675719,0.9653334317\H,0.9457000139,1.0708879428,2.0569743852\H,-2.3268239766,-0.0407230399,0.433832713\H,-2.6163013101,1.6343162627,0.9488946954\H,-3.2625184749,0.2790166611,1.9037763586\H,-0.4347750118,1.4835226955,4.0133481912\H,-2.1903056944,1.2656293674,3.9428912669\H,-1.4198537721,2.5659655221,2.9996336587\H,-1.5557346482,-3.2022645429,1.7951076939\H,-0.6396984109,-3.4244380914,3.2917070639\H,0.0978213524,-3.8610332316,1.7308354793\H,1.8466108292,-0.6987016592,2.7477958557\H,2.0326962416,-2.4347845374,2.5064543932\H,1.1468338425,-1.830712004,3.9281796116\C,1.8126181391,0.366015077,-0.2727835243\H,-0.2280960391,0.300670581,-0.6330550057\O,2.0725438445,1.2139397971,-1.0916061635\O,2.7740097408,-0.3506260989,0.347613658\H,3.6273819932,-0.0408045635,0.0063489707\Version=ES64L-G09RevD.01\State=2-A\HF=-672.0341317\S2=0.755232\S2-1=0.\S2A=0.750018\RMSD=8.287e-09\RMSF=6.503e-06\Dipole=0.5408241,-0.0877012,-0.4240907\Quadrupole=4.7235732,1.9161892,-6.6397624,-4.3926015,5.616092,6.312108\PG=C01 [X(C10H18N1O3)]\@

### Nitroxide m.4



1\1\GINC-R245\FOpt\UM062X\6-31+G(d,p)\C10H18N1O3(2)\ROOT\28-Apr-2016\0\#M062X/6-31+G(d,p) I NT(grid=ultrafine) OPT IOP(2/17=4) Freq=normanmaxdisk=402653184\NitroxideM.2i.freq\0,2\C,-2.071495 0349,-0.1905044181,0.7977177291\C,-1.580579133,1.0919840055,0.1198421915\C,-1.5370385691,-1.418290 8007,0.0592870488\C,-1.7287877973,-1.4391159588,-1.4683730427\C,-1.8973134907,1.1811183007,-1.37695 24324\N,-1.4833457452,-0.0842933461,-2.0441605724\H,-0.4904261649,1.123707302,0.2366154125\H,-1.98 89269312,1.9753649273,0.6190940759\H,-1.981472249,-2.3299181822,0.4704858967\H,-0.4599031264,-1.45 93552831,0.2606964094\C,-3.120827835,-1.9323162592,-1.8950151495\C,-0.6760041868,-2.3754997714,-2.0 706750953\C,-1.0675096797,2.3123641434,-1.9876416751\C,-3.3855137389,1.4472524563,-1.6520374938\O, -1.3818230459,-0.0361396947,-3.3140389583\H,-3.9336930836,-1.3826901851,-1.4225124479\H,-3.23258760 72,-2.9833114029,-1.6115527358\H,-3.2071567473,-1.8458272328,-2.9814441234\H,0.330517862,-1.9853453 24,-1.8932647764\H,-0.8229245972,-2.4779502033,-3.1465086178\H,-0.7611237998,-3.36026979,-1.6009086 313\H,0.0004084063,2.093074164,-1.8997426535\H,-1.2829214643,3.2433967501,-1.4544950779\H,-1.30575 71707,2.4399084688,-3.0440325458\H,-4.0448368517,0.7084993789,-1.1919487794\H,-3.5562800582,1.4290 068833,-2.7319351519\H,-3.6607603958,2.4322384112,-1.2626756787\C,-3.5602499152,-0.2398954537,1.075 7472448\H,-1.6424643475,-0.1988190062,1.8104885185\O,-4.2664318577,-1.2149509741,0.9843266878\O,-4.0 281770575,0.9387375358,1.5384356136\H,-4.9643745868,0.8100805593,1.7560288106\Version=ES64L-G09 RevD.01\State=2-A\HF=-672.0381221\S2=0.754889\S2-1=0.\S2A=0.750014\RMSD=5.145e-09\RMSF=1.955e -05\Dipole=-0.0237534,0.4701528,1.2301581\Quadrupole=2.0234508,1.7662855,-3.7897363,-3.8694692,2.540 6662,2.0025022\PG=C01 [X(C10H18N1O3)]\@

### Nitroxide n

1\1\GINC-R260\FOpt\UM062X\6-31+G(d,p)\C9H15N2O2(2)\ROOT\28-Apr-2016\0\#M062X/6-31+G(d,p) IN T(grid=ultrafine) OPT IOP(2/17=4) Freq=norman maxdisk=402653184\NitroxideN.2.freq\0,2\C,-0.56745890 57,-1.0281122614,-0.5851140329\C,0.1981257767,0.1349518415,-1.1812207395\N,0.7266598365,0.74663466 97,0.0624595765\C,0.1902444238,0.1687528346,1.3128627174\C,-0.5820619138,-0.9946692052,0.751448211 3\O,1.3843882667,1.8273552119,0.0565764172\C,-0.7040865852,1.1406504002,-1.9047338978\C,1.36059918 51,-0.2982783181,-2.0746605034\C,-0.7080229801,1.1891279695,2.0207554225\C,1.3470790855,-0.2615054 985,2.2180511889\H,-1.1050945934,-1.6894050439,1.4032776173\H,-1.5466164884,1.4294692058,-1.269506 9678\H,-1.0895158605,0.6961404321,-2.8236598208\H,-0.1163685377,2.0332403815,-2.1361110401\H,1.995 0209296,-1.0248025735,-1.5581552103\H,1.9642750516,0.5788483638,-2.322730674\H,0.9732145249,-0.744 333004,-2.9937546383\H,-1.5385531729,1.487008141,1.3754344714\H,-0.1168624162,2.0755738066,2.26543 42275\H,-1.1121714003,0.763264616,2.9439431828\H,1.9762400007,-1.0000576552,1.7139213691\H,0.9643 619536,-0.6924798893,3.1481072592\H,1.9570871834,0.6135802159,2.4581302417\C,-1.2363664374,-2.0296 038339,-1.4669023933\N,-1.5814110317,-3.2132747203,-0.8790369131\O,-1.4797515202,-1.7893808037,-2.6 388915117\H,-1.1562394118,-3.5077471305,-0.0151507871\H,-1.9677449629,-3.9222081526,-1.4848227728\ Version=ES64L-G09RevD.01\State=2-A\HF=-611.6557982\S2=0.7552\S2-1=0.\S2A=0.750017\RMSD=6.255e -09\RMSF=9.247e-06\Dipole=-0.4008275,-1.5192293,1.2925416\Quadrupole=-3.2172498,3.9607936,-0.74354 37,-2.1298308,-3.6326822,-3.3417341\PG=C01 [X(C9H15N2O2)]\@

### Nitroxide o.1

1\1\GINC-R537\FOpt\UM062X\6-31+G(d,p)\C9H14N1O3(2)\ROOT\28-Apr-2016\0\#M062X/6-31+G(d,p) IN T(grid=ultrafine) OPT IOP(2/17=4) Freq=norman maxdisk=402653184\NitroxideO.2.freq\0,2\C,-0.53384602 76,-1.0347489105,-0.6032007895\C,0.1874935423,0.1527875185,-1.2011268251\N,0.6096325636,0.82906683 97,0.0477405375\C,0.2055767991,0.1537386689,1.2987024531\C,-0.5236481321,-1.033366295,0.7337177402 \O,1.2690176791,1.9084854769,0.0471009742\C,-0.7311167867,1.0780045073,-2.0032693142\C,1.421516093 3,-0.2372574854,-2.0186431452\C,-0.7054643231,1.0746401051,2.1167081063\C,1.4488300384,-0.24165357 27,2.1019209153\H,-0.9823668393,-1.7913518389,1.3604923657\H,-1.6185640175,1.3404914231,-1.4199370 703\H,-1.0414409468,0.5840885225,-2.9267783074\H,-0.1859714657,1.9946914738,-2.2437194766\H,2.0660 410937,-0.9108309058,-1.4462577487\H,1.9859480928,0.6676504617,-2.2592098429\H,1.1140262291,-0.732 8763619,-2.9421878222\H,-1.5983096569,1.3418780689,1.5452049851\H,-0.1582031364,1.9887257334,2.362 0497892\H,-1.0110041333,0.581733966,3.0441749645\H,2.088284772,-0.9106301726,1.5198787396\H,1.158 9209232,-0.7441433152,3.0292627117\H,2.0149218837,0.6609166137,2.3471676662\C,-1.1667311929,-2.060 782268,-1.4557574894\O,-1.7610700756,-3.0419334291,-0.7481555678\O,-1.1640489712,-2.0421943798,-2.6 657214988\H,-2.144434005,-3.6619204446,-1.3869270505\Version=ES64L-G09RevD.01\State=2-A\HF=-631.5 233926\S2=0.75524\S2-1=0.\S2A=0.750018\RMSD=6.982e-09\RMSF=3.172e-05\Dipole=-0.6177021,-1.0198 563,0.7843539\Quadrupole=0.360181,-1.0757772,0.7155962,-1.4210675,-0.79526,-1.2943109\PG=C01 [X(C9 H14N1O3)]\@

### Nitroxide o.2

1\1\GINC-R1356\FOpt\UM062X\6-31+G(d,p)\C9H14N1O3(2)\ROOT\28-Apr-2016\0\#M062X\6-31+G(d,p) I NT(grid=ultrafine) OPT IOP(2/17=4) Freq=noramanmaxdisk=402653184\NitroxideO.1.freq\0,2\C,-0.5567791 926,-1.0192204081,-0.6187665938\C,0.1689440807,0.1699153949,-1.2151255181\N,0.6065677562,0.8329364 722,0.0374000568\C,0.2076640445,0.1512280341,1.2867424044\C,-0.5331087038,-1.0242958826,0.71773425 96\O,1.2726267123,1.9079362268,0.0373015901\C,-0.7431125209,1.1200652187,-1.9964709267\C,1.4010480 705,-0.2107916416,-2.0409934501\C,-0.6902199397,1.0728830944,2.118403965\C,1.4547715462,-0.2583821 04,2.0767761988\H,-0.9956549057,-1.7897710616,1.3332746623\H,-1.631158483,1.3716802501,-1.40948575 25\H,-1.0539756385,0.6579576938,-2.9358732216\H,-0.1913817102,2.0397441962,-2.2090739211\H,2.03771 48231,-0.9055964133,-1.4856657253\H,1.9739986592,0.6957340018,-2.2539719305\H,1.0967444548,-0.6768 775845,-2.9805822695\H,-1.5855083887,1.3506022723,1.5558401804\H,-0.1343203332,1.9809821365,2.3664 972629\H,-0.9925407797,0.5748432502,3.0440320665\H,2.0847489942,-0.927465306,1.4846590128\H,1.168 5932086,-0.7662832348,3.0021775463\H,2.0288242292,0.6384869779,2.3243907162\C,-1.2355822158,-2.088 4383311,-1.386266952\O,-1.1504545363,-1.9066586058,-2.7207859413\O,-1.8103376476,-3.0316949858,-0.8 968594929\H,-1.6176415837,-2.6461496607,-3.1397482268\Version=ES64L-G09RevD.01\State=2-A\HF=-63 1.5222243\S2=0.755236\S2-1=0.\S2A=0.750018\RMSD=5.019e-09\RMSF=1.111e-05\Dipole=-0.2956331,-0.4 717774,-0.0972997\Quadrupole=-1.7895781,-7.4129073,9.2024854,-5.5659366,1.5177818,2.2013135\PG=C01 [X(C9H14N1O3)]\@

### Nitroxide p

1\1\GINC-R1063\FOpt\UM062X\6-31+G(d,p)\C8H14N1O3(2)\ROOT\28-Apr-2016\0\#M062X\6-31+G(d,p) I NT(grid=ultrafine) OPT IOP(2/17=4) Freq=noraman maxdisk=402653184\NitroxideP.freq\0,2\O,-1.84598374 26,-0.1940138146,0.6782087125\C,-2.3264926227,0.9101074797,0.0747552615\C,-1.1183782547,-1.1592515 202,-0.0805205043\C,-1.7312171705,-1.4036659623,-1.4526895093\C,-2.0684080214,1.1429951961,-1.42269 4484\N,-1.6891943498,-0.098360332,-2.1340415639\H,-1.1412545482,-2.072610271,0.5174456291\H,-0.0783 286217,-0.8279292288,-0.1879285444\C,-3.181628903,-1.8931445755,-1.3536650645\C,-0.8665651058,-2.39 35307432,-2.2242830714\C,-0.9005931875,2.1375738166,-1.5360363438\C,-3.3357429656,1.7258779408,-2.0 5670927\O,-1.6496232791,-0.0519772513,-3.4038630138\H,-3.8003777634,-1.2176404313,-0.7556824568\H,- 3.2139446625,-2.8825744226,-0.8875520291\H,-3.6068963714,-1.9619572745,-2.3583969908\H,0.151932945 5,-2.0130702432,-2.3399992021\H,-1.2813187672,-2.5575395344,-3.2193834768\H,-0.8362444418,-3.346098 6727,-1.687524079\H,-0.0016512778,1.7508225529,-1.0464364331\H,-1.1792862071,3.0854021222,-1.07081 41599\H,-0.684255768,2.2947456839,-2.5952008086\H,-4.1644032256,1.0149711705,-1.9915230616\H,-3.13 68232166,1.9380924513,-3.1079702198\H,-3.615997387,2.6393579125,-1.5316356919\O,-2.9204330844,1.72 58979511,0.7278603758\Version=ES64L-G09RevD.01\State=2-A\HF=-593.4240342\S2=0.755134\S2-1=0.\S 2A=0.750016\RMSD=4.798e-09\RMSF=1.349e-05\Dipole=0.5570485,-1.0070331,-0.2084769\Quadrupole=3.5 258555,5.8612741,-9.3871296,1.27438,4.0195677,-4.5048701\PG=C01 [X(C8H14N1O3)]\@

### Nitroxide r

1\1\GINC-R819\FOpt\UM062X\6-31+G(d,p)\C8H16N1O2(2)\ROOT\28-Apr-2016\0\#M062X\6-31+G(d,p) I NT(grid=ultrafine) OPT IOP(2/17=4) Freq=noraman maxdisk=268435456\NitroxideR.freq\0,2\C,-0.726042442, -1.2498042694,-1.1551232657\C,0.064020711,0.0534866329,-1.30106381\N,0.0141619112,0.7716858484,0.\ C,0.064020711,0.0534866329,1.30106381\C,-0.726042442,-1.2498042694,1.1551232657\O,-0.3545042927,-1. 9699132171,0.\O,0.425927703,1.9770980791,0.\C,-0.6005184904,0.9392951061,-2.3522305399\C,1.52174760 77,-0.2316271583,-1.6852887974\C,-0.6005184904,0.9392951061,2.3522305399\C,1.5217476077,-0.2316271 583,1.6852887974\H,-1.8053798497,-1.0284666033,1.1220364446\H,-0.526740722,-1.8937469947,2.0163215 57\H,-1.6052890595,1.2303986455,-2.0331045282\H,-0.6725722338,0.3918257456,-3.2974493062\H,-0.0137 986416,1.8452784752,-2.5107366973\H,1.946621344,-1.0300994771,-1.0733478135\H,2.118025109,0.676556 6789,-1.5629822927\H,1.5691590068,-0.5430971361,-2.7335909652\H,-1.6052890595,1.2303986455,2.03310 45282\H,-0.0137986416,1.8452784752,2.5107366973\H,-0.6725722338,0.3918257456,3.2974493062\H,1.946 621344,-1.0300994771,1.0733478135\H,1.5691590068,-0.5430971361,2.7335909652\H,2.118025109,0.67655 66789,1.5629822927\H,-0.526740722,-1.8937469947,-2.016321557\H,-1.8053798497,-1.0284666033,-1.12203 64446\Version=ES64L-G09RevD.01\State=2-A\HF=-519.4119985\S2=0.75487\S2-1=0.\S2A=0.750014\RMS D=5.051e-09\RMSF=3.336e-05\Dipole=-0.3126997,-0.6346928,0.\Quadrupole=1.5857267,-7.4036194,5.81789 27,-0.5280929,0,0.\PG=CS [SG(N1O2),X(C8H16)]\@

### Model a.1

1\1\GINC-R37\SP\RM062X\6-31+G(d,p)\C10H18O1\ROOT\15-Jun-2017\0\#M062X\6-31+G(d,p) INT(grid= ultrafine) Nosymm maxdisk=12GB\CycloA.ext.retry.1.freq\0,1\C\C,1,2.862859\C,2,1.544538,1,61.151\C,1,1. 514308,2,61.42,3,29.012,0\C,1,1.514331,4,114.347,3,-59.503,0\C,2,1.544372,3,118.233,4,-49.544,0\C,6,1.5339 06,2,108.088,3,167.493,0\O,1,1.213755,4,122.796,3,117.551,0\C,3,1.533544,2,108.123,6,-168.049,0\C,3,1.537 239,2,113.103,6,72.347,0\C,6,1.537444,2,113.021,3,-73.076,0\H,2,1.099084,3,108.981,4,-174.651,0\H,2,1.1004

5,3,106.852,4,71.053,0\H,4,1.098967,1,108.373,5,59.615,0\H,4,1.094156,1,109.311,5,177.992,0\H,5,1.094149,1,109.281,4,-178.434,0\H,5,1.099068,1,108.208,4,-60.246,0\H,10,1.095305,3,109.647,2,166.93,0\H,10,1.091825,3,112.861,2,-74.071,0\H,10,1.095408,3,110.901,2,47.727,0\H,9,1.095228,3,110.725,2,177.447,0\H,9,1.096,3,110.524,2,-63.131,0\H,9,1.09521,3,111.292,2,56.985,0\H,11,1.09524,6,109.696,2,-166.007,0\H,11,1.095466,6,110.798,2,-46.994,0\H,11,1.091693,6,112.901,2,74.678,0\H,7,1.09527,6,110.7,2,-177.028,0\H,7,1.095186,6,111.268,2,-56.666,0\H,7,1.096,6,110.574,2,63.475,0\Version=ES64L-G09RevD.01\HF=-466.9520441\RMSD=4.516e-09\Dipole=-0.0998569,-0.4632349,1.1774599\Quadrupole=1.2510036,-0.1113309,-1.1396726,-0.300244,0.3366395,1.5915375\PG=C01 [X(C10H18O1)]\@

#### Model a.2

1\1\GINC-R40\FOpt\RM062X\6-31+G(d,p)\C10H18O1\ROOT\10-Dec-2017\0\#M062X/6-31+G(d,p) SCF=Tight INT(grid=ultrafine) OPT IOP(2/17=4) maxdisk=5GB\CatA.parameter.freq\0,1\C,1.1388236474,1.0564523784,-0.6101049869\C,0.0004517991,1.8531950589,0.002816019\C,-1.1397111246,1.0546142413,0.6100483616\C,-1.3294415685,-0.3297675095,-0.0290246319\C,-0.0029805063,-1.139661138,-0.0080727251\C,1.3253164749,-0.3329450012,0.0189279024\O,0.0018262543,3.065977537,0.007211298\C,-1.8284362896,-0.1519955073,-1.4729535429\C,-2.4012925948,-1.0984222825,0.7517487876\C,2.3955403335,-1.0983347375,-0.7672791227\C,1.8246051862,-0.1667478491,1.4641348313\H,-2.0509103174,1.6576570911,0.5343317072\H,-0.9249483733,0.9483746879,1.6822891722\H,-1.1053048729,0.3713082483,-2.1056629173\H,-2.760574939,0.4230521302,-1.4892500161\H,-2.0239737183,-1.1274166048,-1.9309781644\H,-2.1153520871,-1.2101409756,1.8031999967\H,-2.5407495548,-2.1003822121,0.3304607099\H,-3.364695489,-0.578192008,0.71263273\H,2.1094930666,-1.201760059,-1.8195484355\H,2.5326422144,-2.1036406793,-0.3532546755\H,3.3601287047,-0.5806120376,-0.7242650241\H,1.1026058956,0.3535324843,2.1006168367\H,2.7580061277,0.4061174263,1.4846259044\H,2.0179814301,-1.1458977271,1.9150606861\H,-0.0033758594,-1.8055650205,0.8647340304\H,-0.0041322879,-1.7989856954,-0.885856643\Version=ES64L-G09RevD.01\State=1-A\HF=-466.9476707\RMSD=5.211e-09\RMSF=4.856e-06\Dipole=-0.0014814,-1.3262577,-0.004803\Quadrupole=4.1878835,-7.4912313,3.3033478,-0.01277,-0.0809417,-0.0389191\PG=C01 [X(C10H18O1)]\@

#### Model b.1

1\1\GINC-R96\SP\RM062X\6-31+G(d,p)\C10H20O1\ROOT\26-Sep-2017\0\#M062X/6-31+G(d,p) SCF=Tight INT(grid=ultrafine) Nosymm maxdisk=12GB\CycloC.ext1.retry.freq\0,1\C\C,1,2.928143\C,2,1.544035,1,61.068\C,1,1.527069,2,59.059,3,-28.167,0\C,1,1.526901,4,110.554,3,57.017,0\C,2,1.544002,3,118.06,4,48.053,0\C,6,1.537779,2,112.997,3,75.275,0\O,1,1.421104,5,111.263,6,178.841,0\C,6,1.534863,2,107.934,3,-166.289,0\C,3,1.537794,2,112.998,6,-75.287,0\C,3,1.534844,2,107.929,6,166.282,0\H,1,1.095754,5,109.795,6,64.261,0\H,8,0.965225,1,108.382,5,61.848,0\H,4,1.102593,1,107.656,5,-63.358,0\H,4,1.097207,1,109.384,5,-179.247,0\H,5,1.102587,1,107.668,4,63.357,0\H,5,1.097198,1,109.406,4,179.265,0\H,2,1.099625,6,109.309,5,-173.781,0\H,2,1.100515,6,106.68,5,71.889,0\H,9,1.095614,6,110.739,2,177.871,0\H,9,1.09611,6,110.773,2,-62.41,0\H,9,1.095316,6,111.164,2,57.714,0\H,7,1.095599,6,109.759,2,169.189,0\H,7,1.090953,6,113.414,2,-70.94,0\H,7,1.095793,6,110.612,2,50.296,0\H,10,1.0956,3,109.759,2,-169.199,0\H,10,1.095788,3,110.612,2,-50.305,0\H,10,1.090953,3,113.413,2,70.932,0\H,11,1.095611,3,110.737,2,-177.868,0\H,11,1.095319,3,111.164,2,-57.712,0\H,11,1.096104,3,110.771,2,62.412,0\Version=ES64L-G09RevD.01\HF=-468.1538404\RMSD=2.763e-09\Dipole=-0.0487338,0.2367704,0.6916857\Quadrupole=0.0336595,2.2464241,-2.2800837,-0.4731391,0.1804398,-0.8794821\PG=C01 [X(C10H20O1)]\@

#### Model b.2

1\1\GINC-R51\SP\RM062X\6-31+G(d,p)\C10H20O1\ROOT\15-Jun-2017\0\#M062X/6-31+G(d,p) INT(grid=ultrafine) Nosymm maxdisk=12GB\CycloC.ext.retry.freq\0,1\C\C,1,2.92411\C,2,1.544275,1,60.89\C,1,1.521869,2,59.23,3,28.291,0\C,1,1.527069,4,110.521,3,-57.454,0\C,2,1.544145,3,118.037,4,-47.981,0\C,6,1.53774,2,112.985,3,-75.578,0\O,1,1.422797,4,106.562,3,-178.431,0\C,3,1.53489,2,107.848,6,-165.989,0\C,3,1.537836,2,112.942,6,75.744,0\C,6,1.534775,2,107.95,3,165.996,0\H,1,1.100896,4,109.575,3,63.743,0\H,8,0.963945,1,108.934,4,178.342,0\H,5,1.099425,1,107.132,4,-63.393,0\H,5,1.100474,1,110.083,4,-179.399,0\H,4,1.099365,1,107.092,5,63.496,0\H,4,1.097078,1,109.325,5,179.056,0\H,2,1.099685,3,109.355,4,-173.671,0\H,2,1.100174,3,106.679,4,71.915,0\H,9,1.095595,3,110.708,2,178.001,0\H,9,1.096179,3,110.786,2,-62.267,0\H,9,1.095123,3,111.134,2,57.931,0\H,10,1.095655,3,109.734,2,169.517,0\H,10,1.091029,3,113.434,2,-70.633,0\H,10,1.095917,3,110.64,2,50.638,0\H,7,1.095942,6,109.783,2,-169.733,0\H,7,1.095784,6,110.594,2,-50.925,0\H,7,1.090944,6,113.424,2,70.242,0\H,11,1.095804,6,110.778,2,-178.045,0\H,11,1.095091,6,111.144,2,-57.87,0\H,11,1.096131,6,110.745,2,62.268,0\Version=ES64L-G09RevD.01\HF=-468.1539929\RMSD=4.920e-09\Dipole=-0.3903933,0.4738556,0.2766959\Quadrupole=0.8331279,-1.3303716,0.4972437,0.0866325,1.8976163,-1.3361585\PG=C01 [X(C10H20O1)]\@

#### Model b.3

### Model c.1

I1\GINC-R37\SP\RM062X\6-31+G(d,p)\C10H19N1O1\ROOT\15-Jun-2017\0\#M062X\6-31+G(d,p) INT(grid=ultrafine) Nosymm maxdisk=12GB\CycloB.EXT.retry.freq\0,1\C\C,1,2.902315\C,2,1.530844,1,59.376\C,1,1.505475,2,60.508,3,-29.618,0\C,1,1.506361,4,116.434,3,52.183,0\C,2,1.530721,3,111.076,4,56.889,0\C,6,1.45,2,110.576,3,-178.965,0\N,1,1.275876,4,117.073,3,-126.25,0\O,8,1.397701,1,112.608,4,179.716,0\C,3,1.45,2,110.62,6,178.999,0\C,3,1.45,2,109.309,6,-63.345,0\C,6,1.450001,2,109.245,3,63.581,0\H,9,0.963243,8,102.888,1,-179.445,0\H,4,1.092789,1,109.349,5,175.655,0\H,4,1.099444,1,108.395,5,-66.96,0\H,5,1.089912,1,110.66,4,-175.227,0\H,5,1.099215,1,107.76,4,67.061,0\H,2,1.099304,3,109.23,4,-63.692,0\H,2,1.095159,3,110.231,4,179.213,0\H,7,1.089,6,109.47122063,2,180.,0\H,7,1.089,6,109.47122063,2,-60.,0\H,7,1.089,6,109.47122063,2,60.,0\H,12,1.089001,6,109.47122063,2,180.,0\H,12,1.089,6,109.47122063,2,-60.,0\H,12,1.089,6,109.47122063,2,60.,0\H,10,1.089,3,109.47122063,2,180.,0\H,10,1.089,3,109.47122063,2,-60.,0\H,10,1.089,3,109.47122063,2,60.,0\H,11,1.089,3,109.47122063,2,180.,0\H,11,1.089,3,109.47122063,2,-60.,0\H,11,1.089,3,109.47122063,2,60.,0\Version=ES64L-G09RevD.01\HF=-522.1317443\RMSD=4.921e-09\Dipole=-0.0194803,0.04447,0.3019812\Quadrupole=-2.2317209,-0.5180819,2.7498027,-0.1689202,0.2440525,1.3145924\PG=C01 [X(C10H19N1O1)]\@\

### Model c.2

I1\GINC-R41\FOpt\RM062X\6-31+G(d,p)\C10H19N1O1\ROOT\10-Dec-2017\0\#M062X\6-31+G(d,p) SCF=Tight INT(grid=ultrafine) OPT IOP(2/17=4) maxdisk=5GB\CatC2.parameter.freq\0,1\C,0.3646132552,-1.2806389973,-0.8362077234\C,1.4366848544,-0.3867456577,-0.2727748409\C,1.0314504061,0.9324391739,0.3345788103\C,-0.3884902941,1.3757895087,-0.0557701499\C,-1.4240367682,0.2322271645,0.1391296124\C,-0.8992406609,-1.226410118,0.0396050644\N,2.6325483782,-0.8324312225,-0.2751528236\C,-0.3811153437,1.8533283085,-1.5184044504\C,-0.790296777,2.5668921103,0.822082023\C,-1.9807756286,-2.1153083646,-0.5812130112\C,-0.565973453,-1.7682189334,1.438502355\H,0.7508494492,-2.3032668452,-0.8984295743\H,0.111525146,-0.9698375365,-1.8577428174\H,1.7598445932,1.6997565249,0.0479972884\H,1.1209298101,0.8405863989,1.4266319061\H,-0.0890163903,1.064903533,-2.2172624843\H,0.3224236855,2.6836205695,-1.6441120821\H,-1.3762927977,2.2061965372,-1.8098081173\H,-0.7792082933,2.2931683116,1.8825360446\H,-1.8009620495,2.9079775067,0.570751633\H,-0.1037580941,3.4088998888,0.6793044344\H,-2.2035016257,-1.8026802473,-1.6073105324\H,-2.9084623331,-2.0564217749,-0.0008318043\H,-1.6620728311,-3.1633894149,-0.6041087421\H,0.1640512254,-1.1420252147,1.9606123182\H,-0.1488627088,-2.7790959844,1.3719871854\H,-1.4706226433,-1.8116781366,2.0545578417\O,3.5169377571,0.0757576827,0.313735286\H,4.3682087152,-0.3690402087,0.2385888141\H,-2.2205609519,0.3784232847,-0.6024260713\H,-1.9049576313,0.3464721528,1.1195946078\Version=ES64L-G09RevD.01\State=1-A\HF=-522.2320122\RMSD=7.232e-09\RMSF=6.346e-06\Dipole=-0.3602772,0.1049043,0.0296509\Quadrupole=1.8933015,-0.8988364,-0.9944651,0.011232,0.6032669,-0.4151701\PG=C01 [X(C10H19N1O1)]\@\

### Model d.1

I1\GINC-R87\SP\RM062X\6-31+G(d,p)\C11H20O1\ROOT\14-Jul-2017\0\#M062X\6-31+G(d,p) INT(grid=ultrafine) Nosymm maxdisk=12GB\CycloD.1.ext.retry.freq\0,1\C\C,1,2.882631\C,2,1.545199,1,61.361\C,1,1.511576,2,60.583,3,-27.803,0\C,1,1.511557,4,113.866,3,56.346,0\C,2,1.545204,3,118.302,4,48.832,0\C,6,1.534295,2,107.947,3,-167.127,0\O,1,1.423529,5,115.207,6,167.336,0\C,8,1.42268,1,62.34,5,-112.139,0\C,3,1.53423,2,107.95,6,167.127,0\C,3,1.537246,2,112.977,6,-74.086,0\C,6,1.537145,2,112.99,3,74.09,0\H,9,1.089218,1,119.536,5,-0.455,0\H,9,1.089211,1,119.54,5,-154.299,0\H,4,1.099875,1,107.485,5,-63.838,0\H,4,1.09688,1,109.854,5,179.94,0\H,5,1.099878,1,107.489,4,63.821,0\H,5,1.096878,1,109.853,4,-179.954,0\H,2,1.099563,3,109.147,4,174.379,0\H,2,1.1004,3,106.719,4,-71.35,0\H,12,1.095934,6,109.731,2,168.709,0\H,12,1.090984,6,112.974,2,-71.609,0\H,12,1.095754,6,110.786,2,49.729,0\H,7,1.095668,6,110.733,2,177.577,0\H,7,1.095996,6,110.75,2,-62.74,0\H,7,1.095194,6,111.191,2,57.433,0\H,10,1.095674,3,110.735,2,-177.586,0\H,10,1.095201,3,111.192,2,-57.443,0\H,10,1.096003,3,110.751,2,62.731,0\H,11,1.095919,3,109.736,2,-168.644,0\H,11,1.095738,3,110.791,2,-49.649,0\H,11,1.090958,3,112.947,2,71.679,0\Version=ES64L-G09RevD.01\HF=-506.2152843\RMSD=8.170e-09\Dipole=0.1018649,-0.4799433,0.7106193\Quadrupole=1.0149309,0.5825191,-1.5974501,0.0963586,-0.4311543,2.0330938\PG=C01 [X(C11H20O1)]\@\

### Model d.2

I1\GINC-R107\SP\RM062X\6-31+G(d,p)\C11H20O1\ROOT\14-Jul-2017\0\#M062X\6-31+G(d,p) INT(grid=ultrafine) Nosymm maxdisk=12GB\CycloD.2.ext.retry.freq\0,1\C\C,1,2.884339\C,2,1.544176,1,61.546\C,1,1.513031,2,60.467,3,27.51,0\C,1,1.513023,4,114.46,3,-54.515,0\C,2,1.544169,3,118.171,4,-49.846,0\C,6,1.534175,2,107.931,3,168.044,0\C,1,1.469812,5,120.122,6,-151.141,0\O,8,1.423279,1,59.298,5,103.555,0\C,6,1.537576,2,113.016,3,-72.852,0\C,3,1.537602,2,113.017,6,72.858,0\C,3,1.534177,2,107.926,6,-168.037,0\H,4,1.099728,1,107.775,5,65.916,0\H,4,1.097013,1,109.5,5,-177.438,0\H,5,1.09973,1,107.777,4,-65.91,0\H,5,1.097009,1,109.5,4,177.442,0\H,8,1.088671,1,119.461,5,0.322,0\H,8,1.088671,1,119.46,5,-153.211,0\H,2,1.099564,6,109.067,5,1

75.102,0\H,2,1.100999,6,106.871,5,-70.575,0\H,10,1.095923,6,109.58,2,-167.039,0\H,10,1.095974,6,110.648,2,-48.233,0\H,10,1.089869,6,112.793,2,73.802,0\H,7,1.095809,6,110.715,2,-176.959,0\H,7,1.095601,6,111.332,2,-56.66,0\H,7,1.096012,6,110.658,2,63.522,0\H,12,1.095804,3,110.716,2,176.984,0\H,12,1.096015,3,110.657,2,-63.496,0\H,12,1.095601,3,111.332,2,56.684,0\H,11,1.095922,3,109.58,2,166.956,0\H,11,1.089871,3,112.791,2,-73.887,0\H,11,1.095975,3,110.652,2,48.149,0\Version=ES64L-G09RevD.01\HF=-506.2154815\RMSD=4.461e-09\Dipole=-0.1541543,-0.6887477,0.0341853\Quadrupole=0.7486298,-2.3407207,1.5920909,-0.7281304,0.3097595,1.3822216\PG=C01 [X(C11H20O1)]\@

### Model e.1

1\1\GINC-R38\SP\RM062X\6-31+G(d,p)\C11H22O2\ROOT\14-Jul-2017\0\#M062X\6-31+G(d,p) INT(grid=ultrafine) Nosymm maxdisk=12GB\Cyclo.E.ii.ext.retry.freq\0,1\C\C,1,2.957368\C,2,1.542037,1,61.501\C,3,1.539809,2,109.021,1,-24.049,0\C,1,1.529205,4,110.895,3,-51.752,0\C,5,1.540581,1,115.725,4,51.35,0\C,6,1.537755,5,111.341,1,76.479,0\C,3,1.537334,4,111.772,1,-75.857,0\C,3,1.536303,4,108.082,1,166.595,0\C,1,1.531225,4,109.836,3,-172.179,0\C,10,1.422702,1,106.963,4,-64.89,0\C,1,1.425073,4,111.629,3,69.078,0\C,6,1.536111,5,108.167,1,-166.045,0\H,4,1.100247,3,108.064,2,-70.322,0\H,4,1.097677,3,110.168,2,173.719,0\H,5,1.100276,1,107.175,4,-69.358,0\H,5,1.098033,1,108.598,4,175.105,0\H,8,1.087944,3,112.854,4,54.439,0\H,8,1.096599,3,109.575,4,-65.356,0\H,8,1.096334,3,110.143,4,176.328,0\H,9,1.095628,3,111.366,4,-60.239,0\H,9,1.09615,3,110.635,4,179.587,0\H,9,1.095877,3,110.714,4,60.04,0\H,13,1.095717,6,111.4,5,60.88,0\H,13,1.095923,6,110.756,5,-59.524,0\H,13,1.096044,6,110.569,5,-178.996,0\H,7,1.087893,6,112.861,5,-52.154,0\H,7,1.096241,6,110.162,5,-174.345,0\H,7,1.096245,6,109.553,5,67.245,0\H,10,1.097937,1,110.434,4,55.795,0\H,10,1.098192,1,108.514,4,175.674,0\H,12,0.968117,1,106.516,4,72.095,0\H,11,0.961723,10,109.987,1,-165.699,0\H,2,1.101155,3,106.788,4,70.763,0\H,2,1.099696,3,109.347,4,-174.825,0\Version=ES64L-G09RevD.01\HF=-582.649686\RMSD=5.442e-09\Dipole=-0.2210349,-0.7108428,-0.6467061\Quadrupole=-1.7582449,-2.1243155,3.8825604,1.2347345,0.1614758,1.4742818\PG=C01 [X(C11H22O2)]\@

### Model e.2

1\1\GINC-R42\SP\RM062X\6-31+G(d,p)\C11H22O2\ROOT\14-Jul-2017\0\#M062X\6-31+G(d,p) INT(grid=ultrafine) Nosymm maxdisk=12GB\Cyclo.E.iii.ext.retry.freq\0,1\C\C,1,2.960325\C,2,1.542004,1,61.587\C,3,1.540809,2,108.923,1,-23.919,0\C,3,1.537255,4,111.571,1,-75.823,0\C,3,1.536094,4,108.19,1,166.546,0\C,2,1.542181,3,117.873,4,-49.409,0\C,7,1.540313,2,109.123,3,49.264,0\C,1,1.535044,4,110.209,3,-171.959,0\C,9,1.421489,1,111.157,4,-68.071,0\C,1,1.424378,4,111.33,3,69.415,0\C,7,1.536019,8,108.226,1,-166.344,0\C,7,1.537658,8,111.336,1,76.082,0\H,4,1.101113,3,107.972,2,-70.876,0\H,4,1.100146,3,108.896,2,173.191,0\H,8,1.10061,1,107.198,4,-69.383,0\H,8,1.097807,1,108.426,4,175.205,0\H,5,1.087852,3,112.816,4,53.373,0\H,5,1.096683,3,109.598,4,-66.366,0\H,5,1.09612,3,110.116,4,175.346,0\H,6,1.095655,3,111.412,4,-60.455,0\H,6,1.09596,3,110.594,179.412,0\H,6,1.096077,3,110.766,4,59.968,0\H,12,1.095714,7,111.414,8,60.781,0\H,12,1.095792,7,110.731,8,-59.599,0\H,12,1.096026,7,110.584,8,-179.065,0\H,13,1.08794,7,112.909,8,-51.903,0\H,13,1.096227,7,110.179,8,-174.136,0\H,13,1.096093,7,109.531,8,67.454,0\H,9,1.097525,1,110.839,4,56.249,0\H,9,1.094153,1,108.755,4,175.775,0\H,11,0.968651,1,106.686,4,79.199,0\H,10,0.96343,9,109.408,1,80.534,0\H,2,1.101152,3,106.837,4,70.808,0\H,2,1.099538,3,109.225,4,-174.81,0\Version=ES64L-G09RevD.01\HF=-582.6494662\RMSD=4.890e-09\Dipole=0.2278024,-0.8391834,0.1934914\Quadrupole=2.5122085,0.0805937,-2.5928023,-0.706808,-0.5730813,0.520353\PG=C01 [X(C11H22O2)]\@

### Model e.3

1\1\GINC-R38\FOpt\RM062X\6-31+G(d,p)\C11H22O2\ROOT\10-Dec-2017\0\#M062X\6-31+G(d,p) SCF=Tight INT(grid=ultrafine) OPT IOP(2/17=4) maxdisk=12GB\ModelE.3.freq\0,1\C,0.5777841411,1.3870138086,-0.0359557918\C,-0.8612778594,1.0440819296,-0.4645492875\C,-1.3594933698,-0.3532408499,-0.0866473341\C,-0.3566702748,-1.4283038247,-0.5106121924\C,1.1031486167,-1.2032624912,-0.073104188\C,1.5202450739,0.2345447126,-0.4421296859\C,0.6539714305,1.7349856487,1.4604085886\C,1.0181073223,2.6393153161,-0.8101232122\H,-0.9208222486,1.1113471057,-1.5600509091\H,-1.5618746311,1.7883228877,-0.068447609\H,-0.3834936506,-1.4757795094,-1.6091309723\H,-0.7020103382,-2.411970491,-0.1549171095\C,1.9926641296,-2.17475194,-0.8631074215\C,1.3078250152,-1.5166593426,1.417695813\H,0.1835755831,0.9867191846,2.0949133705\H,0.1347523749,2.6831313783,1.6413836751\H,1.6982440497,1.8616223015,1.7690635922\H,1.010045434,2.464197658,-1.8915156012\H,2.0334069814,2.9345134843,-0.5212445876\H,0.3496396204,3.4808042333,-0.5971821105\H,1.9038382796,-2.0082826051,-1.9420806066\H,1.7154455078,-3.2146139708,-0.6550989719\H,3.0450151461,-2.0459708869,-0.5861015375\H,0.6768739338,-0.9160371157,2.070313644\H,2.3526184584,-1.3415264513,1.6980300154\H,1.0868570778,-2.573957456,1.6099344654\C,-2.7203884862,-0.6295617615,-0.7422341238\O,-1.5856738065,-0.3606538088,1.333549463\O,-3.7051976088,0.2727923908,-0.2970496546\H,-2.6534068062,-0.5259643541,-1.8295963485\H,-3.0122803118,-1.6703244424,-0.5172867087\H,-1.6952011231,-1.2761104777,1.6229710216\H,-3.5944416138,0.3531657776,0.6609243426\H,1.6101742196,0.2668021203,-1.5387949058\H,2.5274997331,0.4315018414,-0.0475871214\Version=ES64L-G

09RevD.01\State=1-A\HF=-582.6489986\RMSD=4.465e-09\RMSF=1.025e-05\Dipole=0.6282576,-0.7302977,0.0749307\Quadrupole=-5.3280951,3.1727004,2.1553947,3.0075732,-2.5997978,-0.8126851\PG=C01 [X(C11H22O2)]\@

#### Model f

1\1\GINC-R37\SP\RM062X\6-31+G(d,p)\C12H20O3\ROOT\15-Jun-2017\0\#M062X/6-31+G(d,p) INT(grid=ultrafine) Nosymm maxdisk=12GB\CycloF.ext.retry.freq\0,1\C\C,1,2.943026\C,2,1.542923,1,61.678\C,1,1.530042,2,58.324,3,-26.983,0\C,1,1.522488,4,111.94,3,51.375,0\C,2,1.543051,3,118.045,4,49.596,0\C,6,1.537816,2,113.037,3,75.232,0\C,1,1.538043,5,112.401,6,-176.812,0\O,8,1.425518,1,103.689,5,-140.993,0\C,9,1.353321,8,109.224,1,20.119,0\O,10,1.351001,9,110.125,8,-7.38,0\C,3,1.536129,2,107.818,6,166.414,0\C,3,1.537501,2,113.26,6,-75.195,0\C,6,1.53569,2,107.879,3,-166.327,0\O,10,1.191767,9,124.859,8,172.572,0\H,8,1.091136,1,113.196,5,101.469,0\H,8,1.095791,1,111.973,5,-23.726,0\H,4,1.098966,1,109.159,5,176.427,0\H,4,1.099775,1,106.336,5,-68.676,0\H,5,1.097601,1,108.879,4,-174.844,0\H,5,1.100662,1,106.288,4,70.211,0\H,2,1.098956,3,109.186,4,174.817,0\H,2,1.10092,3,106.866,4,-70.826,0\H,12,1.09558,3,110.475,2,62.902,0\H,12,1.095526,3,111.434,2,-57.183,0\H,12,1.095599,3,110.797,2,-177.678,0\H,13,1.095707,3,109.976,2,-53.031,0\H,13,1.095905,3,109.646,2,-171.334,0\H,13,1.088058,3,113.501,2,68.826,0\H,7,1.095625,6,110.073,2,51.4,0\H,7,1.088406,6,113.359,2,-70.427,0\H,7,1.095907,6,109.647,2,169.806,0\H,14,1.095538,6,110.505,2,-63.025,0\H,14,1.095693,6,110.797,2,177.549,0\H,14,1.095518,6,111.417,2,57.062,0\Version=ES64L-G09RevD.01\HF=-694.7656096\RMSD=6.431e-09\Dipole=-0.8514447,1.5569109,1.2936066\Quadrupole=3.4140437,-1.8241144,-1.5899293,3.4021998,4.4915297,-6.0072622\PG=C01 [X(C12H20O3)]\@

#### Model g.1

1\1\GINC-R96\SP\RM062X\6-31+G(d,p)\C17H26O3S1\ROOT\26-Sep-2017\0\#M062X/6-31+G(d,p) SCF=Tight INT(grid=ultrafine) Nosymm maxdisk=12GB\CycloG.1.ext.retry.freq\0,1\C\C,1,2.897051\C,2,1.544693,1,60.984\C,1,1.521432,2,60.053,3,28.797,0\C,2,1.545207,3,118.16,4,-48.151,0\C,1,1.519717,4,111.808,3,-59.253,0\O,1,1.45486,6,107.491,5,177.567,0\S,7,1.610515,1,117.695,6,127.105,0\C,8,1.774411,7,102.014,1,67.274,0\C,9,1.390495,8,119.569,7,-97.643,0\C,10,1.393398,9,118.783,8,175.147,0\C,11,1.397872,10,121.015,9,0.207,0\C,12,1.401877,11,118.765,10,0.208,0\C,13,1.389358,12,121.075,11,-0.302,0\C,3,1.537977,4,110.363,1,-73.353,0\C,3,1.534496,4,108.721,1,169.171,0\C,5,1.534721,6,108.654,1,-168.334,0\C,5,1.538121,6,110.506,1,74.175,0\C,12,1.506626,11,120.872,10,178.735,0\O,8,1.445007,7,104.604,1,-178.531,0\O,8,1.45226,7,108.81,1,-46.867,0\H,6,1.098776,1,107.705,4,-62.054,0\H,6,1.096476,1,109.373,4,-178.494,0\H,4,1.097938,1,110.186,6,177.993,0\H,4,1.098876,1,107.567,6,61.329,0\H,15,1.091639,3,113.471,4,52.924,0\H,15,1.096071,3,109.669,4,-66.867,0\H,15,1.095657,3,110.629,4,174.058,0\H,16,1.095044,3,111.148,4,-60.429,0\H,16,1.095938,3,110.708,4,179.452,0\H,16,1.095686,3,110.721,4,59.741,0\H,17,1.095083,5,111.18,6,60.741,0\H,17,1.09537,5,110.724,6,-59.437,0\H,17,1.095948,5,110.677,6,-179.11,0\H,18,1.091343,5,113.574,6,-51.776,0\H,18,1.095692,5,110.548,6,-173.043,0\H,18,1.095228,5,109.781,6,68.,0\H,1,1.095494,6,109.729,5,-65.162,0\H,10,1.085755,9,119.801,8,-5.344,0\H,11,1.08651,10,119.459,9,-179.884,0\H,13,1.086658,12,119.39,11,179.659,0\H,14,1.085632,9,119.764,8,4.647,0\H,19,1.092213,12,111.291,11,20.937,0\H,19,1.094977,12,110.433,11,-98.784,0\H,19,1.092976,12,111.141,11,141.894,0\H,2,1.099414,3,109.286,4,-173.787,0\H,2,1.100055,3,106.608,4,71.879,0\Version=ES64L-G09RevD.01\HF=-1286.9143395\RMSD=2.656e-09\Dipole=1.959491,0.2204384,1.650377\Quadrupole=14.4399555,-1.5016324,-12.9383231,1.4344278,-9.2177327,0.7979186\PG=C01 [X(C17H26O3S1)]\@

#### Model g.2

1\1\GINC-R38\FOpt\RM062X\6-31+G(d,p)\C17H26O3S1\ROOT\10-Dec-2017\0\#M062X/6-31+G(d,p) SCF=Tight INT(grid=ultrafine) OPT IOP(2/17=4) maxdisk=12GB\ModelG.2.freq\0,1\C,-1.0507653855,0.1071818369,0.2212766082\C,-1.6672643423,1.3698827861,-0.3560463107\C,-1.5882835102,-1.1484691252,-0.4464233082\C,-3.1184397375,-1.2656922632,-0.3220554153\C,-3.202516266,1.3805694303,-0.2334361602\C,-3.7661923088,0.0552430911,-0.7916041559\H,-1.3836619315,1.4219841513,-1.416641928\H,-1.2381655714,2.2477253569,0.1418983012\H,-1.0985690823,-2.0298518353,-0.0162008065\H,-1.3102571356,-1.0993657918,-1.508767785\C,-3.5154035206,-1.6565770204,1.1114308053\C,-3.6021958786,-2.3862500429,-1.2523984558\C,-3.7544778786,2.5277539876,-1.0905450251\C,-3.6266703542,1.6495680904,1.2201667027\H,-3.0738351812,-1.015924978,1.8762459018\H,-3.1857884778,-2.6798141153,1.3207807784\H,-4.6038076294,-1.6204591987,1.2326542859\H,-3.3534244814,-2.168586083,-2.2965489414\H,-4.6890564568,-2.5074038717,-1.1798801003\H,-3.1373571868,-3.3409591563,-0.9832817775\H,-3.4905348296,2.3961417425,-2.1452473221\H,-3.352389496,3.4904905127,-0.7562883723\H,-4.8469182474,2.5744579901,-1.0166910293\H,-3.1474077934,0.9887751837,1.9440675907\H,-4.7107056041,1.5357521556,1.3312807537\H,-3.365695639,2.6763843231,1.498628306\H,-1.2000546556,0.0728103973,1.3070696177\O,0.3853805862,0.1892790637,-0.034436986\S,1.3247522086,-0.2153796706,1.210925605\O,1.1909076313,0.8020888624,2.2397019533\O,1.0763059284,-1.6079808075,1.546345091\C,2.8939856861,-0.0579643954,0.4145164667\C,3.4423009931,-1.1665077387,-0.2221639768\C,4.6722848087,-1.0285291528,-0.8569991135\C,5.3508936972,0.1953463251,-0.8567695854\C,4.77045007,

1.289601129,-0.2046966834\C,3.5418985751,1.1730583769,0.4363919037\C,6.6994537674,0.3248905943,-1.5159711732\H,2.9135764095,-2.1140726771,-0.2071620267\H,5.1149948421,-1.8849025173,-1.3579101622\H,5.2899278999,2.2437763078,-0.196564465\H,3.0892160692,2.0121719804,0.9546509268\H,6.808409859,-0.3870394987,-2.3373827657\H,7.498216663,0.1257156403,-0.7937907099\H,6.8517489071,1.332620199,-1.9097910451\H,-4.8487726258,0.0156063338,-0.6039348698\H,-3.6459433945,0.0953940916,-1.884561142\Version=ES64L-G09RevD.01\State=1-A\HF=-1286.9123881\RMSD=7.722e-09\RMSF=1.156e-06\Dipole=0.5685917,0.3228349,-1.436182\Quadrupole=15.8622361,-3.8912873,-11.9709488,1.2497558,-6.3645794,2.0220042\PG=C01 [X(C17H26O3S1)]\@

### Model h.1

1\1\GINC-R122\SP\RM062X\6-31+G(d,p)\C10H19N3\ROOT\14-Jul-2017\0\#M062X/6-31+G(d,p) INT(grid=ultrafine) Nosymm maxdisk=12GB\Cyclo.H.ext.retry.freq\0,1\C,C,1,2.917191\C,2,1.54411,1,60.895\C,1,1.523214,2,59.479,3,28.419,0\C,1,1.528944,4,110.817,3,-57.923,0\C,2,1.543844,3,118.028,4,-48.181,0\C,6,1.537585,2,113.111,3,-75.417,0\N,1,1.488143,4,106.693,3,-178.988,0\N,8,1.231548,1,113.82,4,-172.734,0\N,9,1.132273,8,175.166,1,178.683,0\C,3,1.537736,2,112.993,6,75.506,0\C,3,1.534916,2,107.903,6,-166.075,0\C,6,1.534933,2,107.967,3,166.036,0\H,1,1.099365,8,108.035,9,-54.534,0\H,5,1.099124,1,107.39,8,55.843,0\H,5,1.099131,1,10.349,8,-60.571,0\H,4,1.096823,1,109.615,8,57.715,0\H,4,1.099079,1,107.414,8,-58.144,0\H,2,1.100129,3,106.709,4,71.781,0\H,2,1.099447,3,109.305,4,-173.822,0\H,11,1.095672,3,110.604,2,50.409,0\H,11,1.091209,3,113.491,2,-70.745,0\H,11,1.095567,3,109.78,2,169.292,0\H,12,1.095941,3,110.706,2,-62.369,0\H,12,1.095537,3,110.761,2,177.935,0\H,12,1.095085,3,111.163,2,57.771,0\H,13,1.095942,6,110.673,2,62.383,0\H,13,1.095067,6,111.174,2,-57.715,0\H,13,1.095591,6,110.8,2,-177.949,0\H,7,1.095615,6,110.532,2,-50.888,0\H,7,1.095656,6,109.798,2,-169.701,0\H,7,1.09111,6,113.554,2,70.22,0\Version=ES64L-G09RevD.01\HF=-556.4889598\RMSD=4.489e-09\Dipole=0.1760472,0.3001225,1.0031734\Quadrupole=0.8184449,0.8235374,-1.6419823,0.5676606,-1.958776,-0.1355122\PG=C01 [X(C10H19N3)]\@

### Model h.2

1\1\GINC-R38\SP\RM062X\6-31+G(d,p)\C10H19N3\ROOT\14-Jul-2017\0\#M062X/6-31+G(d,p) INT(grid=ultrafine) Nosymm maxdisk=12GB\Cyclo.H.2.ext.retry.freq\0,1\C,C,1,2.919764\C,2,1.543781,1,61.079\C,1,1.52899,2,59.359,3,28.376,0\C,1,1.529003,4,110.939,3,-57.515,0\C,2,1.543779,3,118.045,4,-48.474,0\C,6,1.534895,2,107.942,3,166.442,0\N,1,1.487914,5,111.395,6,-177.767,0\N,8,1.232123,1,114.184,5,-62.262,0\N,9,1.13267,8,174.646,1,-179.986,0\C,6,1.537503,2,113.077,3,-75.007,0\C,3,1.534896,2,107.942,6,-166.442,0\C,3,1.537503,2,113.078,6,75.007,0\H,5,1.101114,1,108.155,4,-62.784,0\H,5,1.097094,1,109.667,4,-179.261,0\H,4,1.097097,1,109.668,5,179.261,0\H,4,1.101112,1,108.158,5,62.781,0\H,1,1.092736,5,110.04,6,-64.498,0\H,2,1.099379,6,109.26,5,174.067,0\H,2,1.100257,6,106.725,5,-71.563,0\H,12,1.095914,3,110.678,2,-62.54,0\H,12,1.09554,3,110.776,2,177.793,0\H,12,1.095122,3,111.202,2,57.563,0\H,13,1.095589,3,110.57,2,50.227,0\H,13,1.091033,3,113.507,2,-70.928,0\H,13,1.095532,3,109.781,2,169.093,0\H,11,1.095589,6,110.57,2,-50.227,0\H,11,1.09553,6,109.781,2,-169.093,0\H,11,1.091033,6,113.506,2,70.928,0\H,7,1.095913,6,110.678,2,62.54,0\H,7,1.095122,6,111.202,2,-57.563,0\H,7,1.095541,6,110.776,2,-177.793,0\Version=ES64L-G09RevD.01\HF=-556.4890417\RMSD=5.875e-09\Dipole=0.1178409,0.5732534,0.9589397\Quadrupole=2.2854709,-2.4999484,0.2144774,-1.0250893,-0.2866827,-1.3964309\PG=C01 [X(C10H19N3)]\@

### Model h.3

1\1\GINC-R37\FOpt\RM062X\6-31+G(d,p)\C10H19N3\ROOT\11-Dec-2017\0\#M062X/6-31+G(d,p) SCF=Tight INT(grid=ultrafine) OPT IOP(2/17=4) maxdisk=5GB\Modell.H.3.freq\0,1\C,0.9942218691,-0.7887605924,-1.0541352665\C,0.8089112532,0.728571306,-1.1618384302\C,-0.3485603955,-1.515672529,-1.0000722909\C,-1.3591020548,-0.9824655821,0.0346510073\C,-0.1314200973,1.3586955079,-0.1178254233\C,-1.4475960985,0.554815081,-0.0807426327\H,0.3915716096,0.9147959857,-2.1613618656\H,1.7840013326,1.2356015727,-1.1413915512\H,-0.1730619745,-2.5857584403,-0.835727818\H,-0.79430009,-1.4140991675,-1.9992648743\C,-1.0194391534,-1.462587147,1.4557963482\C,-2.7418878738,-1.5543199779,-0.3132535646\C,-0.4609614518,2.7866518656,-0.5776069096\C,0.5407671394,1.4747453949,1.2600195417\H,0.0111671926,-1.2620119349,1.7422453425\H,-1.1648331818,-2.5468870655,1.5213385492\H,-1.68781146,-0.9899458094,2.1847708498\H,-3.0649823329,-1.2392661329,-1.3115082143\H,-3.4924319154,-1.2142210946,0.4093130355\H,-2.7258612964,-2.6497048702,-0.2901800359\H,-0.9421606132,2.7870311409,-1.5616447485\H,0.4485937416,3.3944364048,-0.6427557061\H,-1.1398825593,3.2729671755,0.1318058741\H,0.8576478684,0.5163627041,1.669099564\H,-0.1492899711,1.9353021402,1.9759794145\H,1.4263556424,2.1174493187,1.1900525035\N,1.8084957613,-1.2114964463,0.1226308477\H,1.5296092004,-1.1337367925,-1.9502896196\N,2.8887753817,-0.6325216046,0.2222678972\N,3.8931739931,-0.1391625735,0.3978867511\H,-1.9785615561,0.7745741691,-1.019668609\H,-2.0853779098,0.9410579934,0.7273800341\Version=ES64L-G09RevD.01\State=1-A\HF=-556.4869411\RMSD=4.340e-09\RMSF=2.203e-06\Dipole=-0.6649515,0.1590632,-0.5582702\Quadrupole=-4.077223,1.1796557,2.8975672,0.0760545,-1.8155874,0.8668851\PG=C01 [X(C10H19N3)]\@

#### Model h.4

1\1\GINC-R37\FOpt\RM062X\6-31+G(d,p)\C10H19N3\ROOT\11-Dec-2017\0\#M062X\6-31+G(d,p) SCF=Ti  
ght INT(grid=ultrafine) OPT IOP(2/17=4) maxdisk=5GB\Modell.4.freq\0,1\C,-0.7155817833,0.6430299861,  
-0.8462599519\C,-1.119844026,-0.7551034028,-0.3371178406\C,-0.0058966548,-1.4630545576,0.444442425  
7\C,1.4044540193,-1.0934018137,-0.0310213022\C,1.6239836535,0.4392747474,0.0937195436\C,0.36043761  
96,1.339272178,-0.0022515961\C,1.6165066668,-1.565697933,-1.4794265758\C,2.4273959639,-1.818254657  
5,0.8512998351\C,0.7409518413,2.6606815462,-0.6807984236\C,-0.1922231574,1.6697158816,1.3942822076  
\H,-1.6058269135,1.2839903929,-0.9088791229\H,-0.3475197592,0.5482127801,-1.8744678742\H,-0.151848  
6097,-2.5479787707,0.3805256139\H,-0.1090359234,-1.2026431881,1.5030773954\H,0.9573664275,-1.06140  
32952,-2.1915254519\H,1.4352633822,-2.6435863302,-1.560936932\H,2.647973542,-1.373466312,-1.794313  
4596\H,2.2809586877,-1.5670229698,1.9072453215\H,3.4477894903,-1.5311398045,0.573153889\H,2.34071  
51799,-2.9052740824,0.743253891\H,1.0936522717,2.4907316603,-1.7040495319\H,1.5429752928,3.160593  
1359,-0.1259719834\H,-0.1156836652,3.3427769,-0.7226286606\H,-0.4784140002,0.7802344053,1.95958281  
34\H,-1.083180883,2.3026504722,1.3107185501\H,0.5579208247,2.2172238168,1.9757033761\N,-2.2925810  
45,-0.7084210807,0.5843803449\H,-1.4037702146,-1.3686963575,-1.2034275994\N,-3.3249014083,-0.294851  
2841,0.0567624634\N,-4.3136294015,0.0799428803,-0.3487529441\H,2.1141246927,0.6531101365,1.052738  
5614\H,2.3399378894,0.7406649203,-0.6827069818\Version=ES64L-G09RevD.01\State=1-A\HF=-556.4811  
201\RMSD=3.542e-09\RMSF=1.345e-05\Dipole=0.9155725,-0.0418301,-0.3369212\Quadrupole=-4.8607608,2.9  
122758,1.948485,0.0902571,0.4906326,1.0062928\PG=C01 [X(C10H19N3)]\@

#### Model i

1\1\GINC-R37\SP\RM062X\Gen\C10H19Br\ROOT\15-Jun-2017\0\#M062X/gen 6D 10F INT(grid=ultrafine)  
Nosymm maxdisk=12GB\CycloI.ext.retry.freq\0,1\C\C,1,2.900697\C,2,1.543409,1,60.983\C,1,1.521749,2,60.  
102,3,-28.73,0\C,1,1.521747,4,111.745,3,58.922,0\C,2,1.543418,3,117.976,4,48.461,0\C,6,1.537363,2,113.128,  
3,75.227,0\Br,1,1.973675,5,109.419,6,179.733,0\C,6,1.534829,2,107.995,3,-166.113,0\C,3,1.534829,2,107.995,  
6,166.111,0\C,3,1.537364,2,113.127,6,-75.229,0\H,1,1.091524,5,111.407,6,66.415,0\H,4,1.098582,1,108.097,5,  
-61.407,0\H,4,1.096132,1,110.382,5,-178.322,0\H,5,1.098583,1,108.098,4,61.406,0\H,5,1.096131,1,110.382,4,  
178.321,0\H,2,1.099427,6,109.291,5,-174.073,0\H,2,1.100127,6,106.72,5,71.518,0\H,9,1.095492,6,110.788,2,1  
77.769,0\H,9,1.095957,6,110.628,2,-62.576,0\H,9,1.095029,6,111.191,2,57.528,0\H,7,1.095523,6,109.794,2,16  
9.21,0\H,7,1.091213,6,113.516,2,-70.799,0\H,7,1.095616,6,110.572,2,50.332,0\H,11,1.095523,3,109.794,2,-16  
9.213,0\H,11,1.095615,3,110.572,2,-50.334,0\H,11,1.091211,3,113.516,2,70.797,0\H,10,1.09549,3,110.788,2,-  
177.772,0\H,10,1.095029,3,111.191,2,-57.531,0\H,10,1.095958,3,110.628,2,62.573,0\Version=ES64L-G09Rev  
D.01\HF=-2966.2523004\RMSD=2.429e-09\Dipole=0.078813,-0.3892569,0.9977018\Quadrupole=0.9467992,-  
0.1689,-0.7778992,0.2355349,-0.1492246,0.7396182\PG=C01 [X(C10H19Br)]\@

#### Model k.1

1\1\GINC-R38\FOpt\RM062X\6-31+G(d,p)\C13H22O1\ROOT\11-Dec-2017\0\#M062X\6-31+G(d,p) SCF=Ti  
ght INT(grid=ultrafine) OPT IOP(2/17=4) maxdisk=12GB\Modell.1.freq\0,1\C,0.5923676546,0.2021171614,  
-1.3766841724\C,-0.4334995612,1.3239166645,-1.2395157171\C,-0.073138444,-1.1716899438,-1.236343441  
3\C,-0.9183369865,-1.3594552497,0.0362171127\C,-1.3198642135,1.2575466502,0.0200837691\C,-1.891308  
802,-0.1688096439,0.1675854058\H,-1.0829538443,1.2708140284,-2.1245477092\H,0.0884925399,2.2876008  
067,-1.2798732069\H,0.6689979034,-1.9772924195,-1.315226316\H,-0.7300857484,-1.2841046188,-2.110732  
0597\C,-0.0313183121,-1.5516444321,1.2775337772\C,-1.7567952223,-2.6360267723,-0.1236322529\C,-2.50  
40763355,2.2158882882,-0.1772212378\C,-0.5595773021,1.7302904731,1.2704559233\H,0.6883802177,-0.74  
56352686,1.4160124549\H,0.5282358195,-2.4913885601,1.1907647926\H,-0.6511076127,-1.6194909457,2.17  
89222317\H,-2.4200117106,-2.5708297354,-0.9931124887\H,-2.3772505015,-2.8041441919,0.7640756813\H,  
-1.1113169438,-3.5123364329,-0.2529854176\H,-3.1059085308,1.9331684603,-1.0480280007\H,-2.15125426  
41,3.2426354976,-0.3258530072\H,-3.1569531365,2.2093431721,0.7031571859\H,0.3861282017,1.21208987  
12,1.4156026278\H,-1.1814185349,1.5961980917,2.1633768727\H,-0.3307423338,2.798294865,1.179052753  
6\O,1.626601408,0.4475632073,-0.4264400067\H,1.0447001804,0.2635626816,-2.381738585\C,2.7395656233,-  
0.4068237715,-0.5546693548\C,3.8416074917,0.1079261732,0.2628079265\C,4.7590517294,0.5099558443,0.  
9336654715\H,3.0586354983,-0.4651578199,-1.6074955044\H,2.4993306439,-1.4266727102,-0.2212136651\  
H,5.5664696857,0.8742794382,1.5287841299\H,-2.6490153243,-0.2928382077,-0.621459774\H,-2.430720932  
7,-0.2451106511,1.122863801\Version=ES64L-G09RevD.01\State=1-A\HF=-583.5491041\RMSD=3.999e-09\  
RMSF=5.928e-06\Dipole=-0.0817076,-0.3568623,-0.4002069\Quadrupole=0.8461638,-1.5915531,0.7453892,-  
0.3883586,0.9626266,0.8073518\PG=C01 [X(C13H22O1)]\@

#### Model k.2

1\1\GINC-R37\SP\RM062X\6-31+G(d,p)\C13H22O1\ROOT\14-Jul-2017\0\#M062X\6-31+G(d,p) INT(grid=u  
ltrafine) Nosymm maxdisk=12GB\Cyclo.K3.ext.retry.freq\0,1\C\C,1,2.92359\C,1,1.522568,2,59.132\C,3,1.53  
7987,1,113.493,2,-26.983,0\C,2,1.543208,4,117.884,3,-48.064,0\C,1,1.527893,3,110.816,4,-57.458,0\O,1,1.425



436,6,112.533,5,175.33,0\C,7,1.408718,1,115.498,6,67.075,0\C,8,1.474482,7,113.806,1,-92.814,0\C,9,1.20665  
8,8,178.386,7,-134.021,0\C,4,1.537862,3,110.773,1,-73.705,0\C,4,1.534935,3,108.733,1,168.738,0\C,5,1.53499  
9,6,108.643,1,-168.606,0\C,5,1.538181,6,110.61,1,74.006,0\H,6,1.099458,1,107.275,3,-64.026,0\H,6,1.097464,  
1,110.729,3,179.918,0\H,3,1.096977,1,109.25,6,179.015,0\H,3,1.099016,1,107.102,6,63.442,0\H,11,1.09108,4,  
113.446,3,51.919,0\H,11,1.095699,4,109.743,3,-67.977,0\H,11,1.095854,4,110.633,3,173.144,0\H,12,1.095097,  
4,111.137,3,-60.411,0\H,12,1.096129,4,110.732,3,179.438,0\H,12,1.09563,4,110.753,3,59.711,0\H,13,1.095073,5  
,111.114,6,60.649,0\H,13,1.095617,5,110.739,6,-59.446,0\H,13,1.096192,5,110.744,6,-179.199,0\H,14,1.09109  
8,5,113.457,6,-52.378,0\H,14,1.095826,5,110.62,6,-173.548,0\H,14,1.095801,5,109.743,6,67.589,0\H,1,1.1032  
65,6,109.856,5,-64.658,0\H,8,1.094413,7,106.751,1,147.688,0\H,8,1.100227,7,110.737,1,30.813,0\H,10,1.0672  
19,9,179.422,8,138.753,0\H,2,1.099724,4,109.375,3,-173.749,0\H,2,1.10013,4,106.69,3,71.791,0\Version=ES6  
4L-G09RevD.01\HF=-583.550469\RMSD=3.697e-09\Dipole=-0.3515225,0.3255912,0.2372311\Quadrupole=-  
0.2685255,0.3167382,-0.0482127,2.3527417,1.1330373,-0.9260521\PG=C01 [X(C13H22O1)]\@

### Model k.3

1\1\GINC-R114\SP\RM062X\6-31+G(d,p)\C13H22O1\ROOT\14-Jul-2017\0\#M062X\6-31+G(d,p) INT(grid=  
ultrafine) Nosymm maxdisk=12GB\Cyclo.K.ext.retry.freq\0,1\C,1,2.920236\C,2,1.543317,1,60.943\C,1,1.5  
27746,2,59.507,3,-28.335,0\C,1,1.522078,4,110.762,3,57.633,0\C,5,1.538133,1,113.282,4,-58.044,0\C,6,1.5348  
3,5,108.763,1,168.987,0\O,1,1.426946,4,112.369,3,175.573,0\C,8,1.409426,1,115.924,4,60.253,0\C,9,1.474544,8  
,113.95,1,53.164,0\C,10,1.206993,9,179.163,8,-110.706,0\C,6,1.537704,5,110.813,1,-73.366,0\C,3,1.534874,4,  
108.767,1,-168.775,0\C,3,1.538452,4,110.343,1,73.815,0\H,4,1.100253,1,107.639,5,-63.402,0\H,4,1.09813,1,11  
0.824,5,179.387,0\H,5,1.096904,1,109.16,4,178.648,0\H,5,1.0993,1,107.43,4,62.923,0\H,12,1.09093,6,113.422,  
5,52.385,0\H,12,1.095674,6,109.749,5,-67.514,0\H,12,1.095934,6,110.587,5,173.632,0\H,7,1.095179,6,111.151,5  
,-60.247,0\H,7,1.096156,6,110.753,5,179.58,0\H,7,1.09563,6,110.728,5,59.867,0\H,13,1.095215,3,111.157,4,60.8  
34,0\H,13,1.095737,3,110.761,4,-59.372,0\H,13,1.096144,3,110.726,4,-179.045,0\H,14,1.091047,3,113.404,4,-  
50.999,0\H,14,1.095817,3,110.613,4,-172.394,0\H,14,1.095769,3,109.718,4,68.673,0\H,1,1.099659,4,109.828,3,-  
64.217,0\H,9,1.098556,8,111.289,1,-70.157,0\H,9,1.093033,8,105.776,1,173.23,0\H,11,1.067422,10,179.448,9,  
-152.182,0\H,2,1.100269,6,106.697,5,71.842,0\H,2,1.099694,6,109.408,5,-173.693,0\Version=ES64L-G09Rev  
D.01\HF=-583.5522629\RMSD=4.086e-09\Dipole=0.4006255,-0.1688962,0.2355698\Quadrupole=-1.0293184,  
1.4656063,-0.4362879,-0.4457112,-1.6786763,0.2932779\PG=C01 [X(C13H22O1)]\@

### Model k.4

1\1\GINC-R38\FOpt\RM062X\6-31+G(d,p)\C13H22O1\ROOT\11-Dec-2017\0\#M062X\6-31+G(d,p) SCF=Ti  
ght INT(grid=ultrafine) OPT IOP(2/17=4) maxdisk=5GB\ModellK.4.freq\0,1\C,-0.1215987077,1.1085310412,  
-0.7233227597\C,-1.0005799847,0.1305576806,0.0619920507\C,-0.195885462,-0.9597586889,0.7931481433\  
C,1.1607781481,-1.2893563404,0.1529906276\C,2.0222139634,-0.0020283976,0.0249691637\C,1.255749605  
4,1.3431930303,-0.0916729487\C,0.9469559051,-1.9493085873,-1.2197403799\C,1.8998951284,-2.29408745  
7,1.0449319286\C,2.0558689119,2.29955505,-0.9832083649\C,1.0979187472,2.0066858327,1.2869559093\H,  
-0.6542554916,2.0607013824,-0.8346106742\H,0.005995098,0.7087626719,-1.7352973373\H,-0.7994723288,  
-1.8755809638,0.8434499311\H,-0.030240826,-0.6519166887,1.8327065519\H,0.4216227463,-1.301249421,-  
1.9238584929\H,0.3492083083,-2.8616231852,-1.1119345717\H,1.9117621279,-2.2259791115,-1.6597182363  
\H,2.0387810105,-1.8949354641,2.0558181384\H,2.8898515318,-2.5207457662,0.632515619\H,1.343583919  
3,-3.2352895304,1.12220261\H,2.1447448843,1.9031302297,-2.0004170104\H,3.067301004,2.4430825435,-0.  
5858475713\H,1.5723141273,3.281297156,-1.0403919375\H,0.5802800785,1.3665173408,2.0068048788\H,0.  
5294137933,2.9397302629,1.1998819506\H,2.0803941236,2.2481357164,1.7075403816\O,-1.9045069179,-0.  
431423772,-0.8949469119\H,-1.5924209643,0.6894955628,0.8014486283\C,-3.9813221079,0.1492154844,0.1  
69521786\C,-4.6981283041,1.0207878092,0.5972372385\H,-5.3338036612,1.7935793068,0.9685828852\C,-3.  
1062591083,-0.919486433,-0.348862642\H,-2.9183300864,-1.6449059476,0.4561402689\H,-3.6187047438,-1.  
4469075356,-1.1574581284\H,2.6967676305,0.0681008784,0.8891470007\H,2.6714079015,-0.1203256898,-0.  
8529077251\Version=ES64L-G09RevD.01\State=1-A\HF=-583.5444072\RMSD=3.210e-09\RMSF=2.128e-06  
\Dipole=0.0280617,-0.0161899,0.431129\Quadrupole=0.9541623,1.3819854,-2.3361477,-0.4283312,-1.927514  
1,0.9598604\PG=C01 [X(C13H22O1)]\@

### Model k.5

1\1\GINC-R38\FOpt\RM062X\6-31+G(d,p)\C13H22O1\ROOT\11-Dec-2017\0\#M062X\6-31+G(d,p) SCF=Ti  
ght INT(grid=ultrafine) OPT IOP(2/17=4) maxdisk=5GB\ModellK.5.freq\0,1\C,0.1581843709,0.7174306097,1.0  
291301806\C,0.7256303104,-0.640573364,0.5738338243\C,-0.2079327917,-1.3979871278,-0.3760967482\C,-  
1.6965374151,-1.1360286548,-0.1184950144\C,-1.9998198428,0.3799347942,-0.2594530263\C,-0.830075831,  
1.3576607287,0.0430381517\C,-2.0885678273,-1.6473407468,1.2782158666\C,-2.52384475,-1.9108639266,-1.1  
503728837\C,-1.4007435977,2.6342157014,0.6724706927\C,-0.096517495,1.758516735,-1.2482417277\H,0.9  
908094658,1.4121512548,1.1995649438\H,-0.338235458,0.597385253,1.9997654861\H,0.0027035231,-2.472

2200566,-0.3103490716\H,0.0434307861,-1.0987686445,-1.3992818934\H,-1.5824838153,-1.1066338132,2.0  
829418404\H,-1.8411411134,-2.7102628446,1.3805968331\H,-3.1671657627,-1.5360631588,1.434974862\H,-  
2.2376702664,-1.6314274361,-2.1700020234\H,-3.591896381,-1.6973331786,-1.0275410812\H,-2.379940665  
1,-2.9915605421,-1.0391894502\H,-1.8958084743,2.4160595269,1.6253438366\H,-2.1389306885,3.09537626  
07,0.0063147986\H,-0.6090964421,3.3690434433,0.8580975057\H,0.3469255811,0.9064836883,-1.76695124  
22\H,0.7179531255,2.4553926824,-1.0207382363\H,-0.7892685962,2.2577855395,-1.935120372\O,1.9594226  
792,-0.4937027382,-0.1294914728\H,0.9146256071,-1.257978966,1.4673477054\C,4.2780379838,-0.1207810  
083,-0.0808330111\C,5.2859294149,0.0549590577,-0.718359986\H,6.1724562169,0.2094577128,-1.29186936  
98\C,3.0708558796,-0.3324714135,0.7217509345\H,3.2013619747,-1.2277573115,1.3493568185\H,2.9379487  
115,0.5259548223,1.3966896494\H,-2.8479790229,0.6164133763,0.3974112746\H,-2.3472793942,0.5809237  
452,-1.2815985943\Version=ES64L-G09RevD.01\State=1-A\HF=-583.5422135\RMSD=4.867e-09\RMSF=1.2  
25e-05\Dipole=-0.2427436,-0.0103615,0.5113206\Quadrupole=1.3020217,-1.2520364,-0.0499853,0.9772728,0.4  
231246,-0.8604814\PG=C01 [X(C13H22O1)]\@

### Model I.1

1\1\GINC-R146\SP\RM062X\6-31+G(d,p)\C13H22O2\ROOT\21-Sep-2017\0\#M062X\6-31+G(d,p) INT(grid  
=ultrafine) Nosymm maxdisk=12GB\CycloL.GOOD.freq\0,1\C\C,1,2.905063\C,2,1.5443,1,60.958\C,1,1.5203,2  
,59.868,3,-28.536,0\C,1,1.524292,4,111.365,3,58.584,0\C,5,1.539392,1,112.356,4,-58.687,0\C,6,1.534723,5,10  
8.75,1,168.87,0\O,1,1.443379,4,106.499,3,178.085,0\C,8,1.342997,1,116.844,4,157.921,0\C,9,1.48833,8,110.9  
49,1,179.521,0\C,10,1.331224,9,120.035,8,179.889,0\C,6,1.538068,5,110.469,1,-73.548,0\C,3,1.534719,4,108.  
657,1,-168.821,0\C,3,1.537626,4,110.695,1,73.59,0\O,9,1.210804,8,124.04,1,-0.734,0\H,4,1.099125,1,107.825,  
5,-62.054,0\H,4,1.097143,1,109.781,5,-178.485,0\H,5,1.096174,1,109.724,4,178.593,0\H,5,1.099523,1,107.462,4  
,61.669,0\H,12,1.090979,6,113.459,5,50.741,0\H,12,1.095252,6,109.727,5,-68.787,0\H,12,1.095789,6,110.613,  
5,172.188,0\H,7,1.095245,6,111.189,5,-60.655,0\H,7,1.096064,6,110.684,5,179.213,0\H,7,1.095451,6,110.72,5,  
59.557,0\H,13,1.095155,3,111.164,4,60.371,0\H,13,1.095675,3,110.77,4,-59.831,0\H,13,1.095932,3,110.695,4,  
-179.511,0\H,14,1.090933,3,113.495,4,-52.819,0\H,14,1.095672,3,110.51,4,-173.92,0\H,14,1.095711,3,109.8,4,  
67.256,0\H,1,1.094455,4,111.39,3,-65.314,0\H,10,1.085018,9,116.975,8,-0.11,0\H,11,1.086287,10,119.956,9,0.  
01,0\H,11,1.084494,10,121.515,9,-179.958,0\H,2,1.099507,6,109.316,5,-173.817,0\H,2,1.100276,6,106.7,5,71.  
771,0\Version=ES64L-G09RevD.01\HF=-658.8307338\RMSD=2.698e-09\Dipole=0.232185,0.5114959,0.171  
4453\Quadrupole=-2.0001961,-2.8350853,4.8352814,-1.4194384,0.5811154,-3.975049\PG=C01 [X(C13H22O  
2)]\@

### Model I.2

1\1\GINC-R245\SP\RM062X\6-31+G(d,p)\C13H22O2\ROOT\26-Sep-2017\0\#M062X\6-31+G(d,p) SCF=Tig  
ht INT(grid=ultrafine) NoSymm maxdisk=12GB\CycloL.GOOD.1.freq\0,1\C\C,1,2.905073\C,2,1.544345,1,60.9  
4\C,1,1.520297,2,59.857,3,-28.596,0\C,1,1.524039,4,111.339,3,58.696,0\C,2,1.544232,3,118.056,4,48.117,0\C,  
6,1.534741,2,107.872,3,-166.095,0\O,1,1.443441,4,106.463,3,178.244,0\C,8,1.342582,1,116.77,4,158.121,0\C,  
9,1.486827,8,113.128,1,179.326,0\C,10,1.331994,9,123.75,8,-0.848,0\C,3,1.534705,2,107.981,6,166.092,0\C,3,  
1.537671,2,112.949,6,-75.415,0\C,6,1.538015,2,113.145,3,75.31,0\O,9,1.211453,8,123.911,1,-0.937,0\H,4,1.09  
9277,1,107.856,5,-61.907,0\H,4,1.09719,1,109.774,5,-178.396,0\H,5,1.096151,1,109.756,4,178.578,0\H,5,1.09  
9567,1,107.472,4,61.653,0\H,14,1.090954,6,113.493,2,-71.632,0\H,14,1.095231,6,109.72,2,168.809,0\H,14,1.0  
95813,6,110.593,2,49.807,0\H,7,1.095263,6,111.185,2,57.567,0\H,7,1.096065,6,110.686,2,-62.561,0\H,7,1.095  
449,6,110.727,2,177.778,0\H,12,1.095176,3,111.174,2,-57.824,0\H,12,1.095689,3,110.77,2,-178.042,0\H,12,1.  
095926,3,110.688,2,62.288,0\H,13,1.090932,3,113.485,2,70.047,0\H,13,1.09565,3,110.516,2,-51.055,0\H,13,1.  
095695,3,109.801,2,-169.892,0\H,1,1.094401,4,111.335,3,-65.158,0\H,10,1.085147,9,113.741,8,179.28,0\H,11,  
1.085132,10,120.951,9,0.092,0\H,11,1.084975,10,120.969,9,-179.91,0\H,2,1.099517,3,109.225,4,173.763,0\H,2,1  
.100313,3,106.698,4,-71.875,0\Version=ES64L-G09RevD.01\HF=-658.8299297\RMSD=5.261e-09\Dipole=0.  
3666888,0.7244535,0.3075418\Quadrupole=-1.9665977,-1.2069112,3.1735089,-1.4585956,-0.7590775,-5.4739  
191\PG=C01 [X(C13H22O2)]\@

### Model I.3

1\1\GINC-R42\SP\RM062X\6-31+G(d,p)\C13H22O2\ROOT\14-Jul-2017\0\#M062X\6-31+G(d,p) INT(grid=u  
ltrafine) Nosymm maxdisk=12GB\CycloL.ext.retry.freq\0,1\C\C,1,2.944424\C,2,1.543791,1,61.652\C,1,1.523  
918,2,58.69,3,25.994,0\C,1,1.527774,4,112.271,3,-50.123,0\C,2,1.54318,3,118.114,4,-48.588,0\C,6,1.537875,2,  
113.002,3,-75.595,0\O,1,1.447224,5,111.344,6,-70.331,0\C,8,1.342661,1,116.988,5,-77.56,0\O,9,1.210417,8,12  
4.102,1,-1.537,0\C,6,1.535895,2,107.834,3,166.419,0\C,3,1.537975,2,112.999,6,76.189,0\C,3,1.536026,2,107.7  
48,6,-165.868,0\C,9,1.488476,8,110.797,1,178.442,0\C,14,1.331259,9,120.096,8,-179.345,0\H,5,1.099326,1,10  
6.062,4,-69.405,0\H,5,1.096044,1,109.393,4,176.103,0\H,4,1.097103,1,109.337,5,-175.1,0\H,4,1.098935,1,106.  
133,5,70.035,0\H,1,1.094541,5,108.813,6,172.331,0\H,14,1.085552,9,116.983,8,0.483,0\H,15,1.086293,14,119.  
926,9,-0.193,0\H,15,1.084467,14,121.529,9,179.857,0\H,2,1.099743,6,109.297,5,174.72,0\H,2,1.10079,6,106.7  
09,5,-70.984,0\H,12,1.096085,3,110.177,2,52.042,0\H,12,1.088326,3,113.181,2,-69.791,0\H,12,1.09617,3,109.

616,2,170.529,0\H,13,1.095955,3,110.634,2,-62.684,0\H,13,1.095878,3,110.777,2,177.751,0\H,13,1.095423,3,111.322,2,57.435,0\H,11,1.096029,6,110.667,2,62.27,0\H,11,1.095406,6,111.291,2,-57.872,0\H,11,1.095749,6,110.742,2,-178.101,0\H,7,1.096141,6,110.18,2,-54.655,0\H,7,1.096322,6,109.689,2,-173.155,0\H,7,1.088787,6,113.269,2,66.774,0\Version=ES64L-G09RevD.01\HF=-658.8286329\RMSD=4.342e-09\Dipole=0.3996629,0.2437118,0.3896614\Quadrupole=-2.8419777,5.3043411,-2.4623634,0.6775718,-1.9138105,-2.9493945\PG=C01 [X(C13H22O2)]\@

#### Model I.4

1\1\GINC-R148\SP\RM062X\6-31+G(d,p)\C13H22O2\ROOT\16-Jul-2017\0\#M062X/6-31+G(d,p) INT(grid=ultrafine) Nosymm maxdisk=12GB\CycloL.2.ext.retry.freq\0,1\C,1,2.945701\C,2,1.543895,1,61.475\C,1,1.527972,2,58.586,3,-26.577,0\C,1,1.523596,4,112.176,3,50.714,0\C,2,1.543311,3,118.091,4,49.055,0\C,6,1.535841,2,107.941,3,-165.772,0\O,1,1.447611,4,111.621,3,-70.201,0\C,8,1.342158,1,116.823,4,-76.796,0\O,9,1.211185,8,123.974,1,-1.239,0\C,3,1.536001,2,107.706,6,166.316,0\C,3,1.538476,2,113.234,6,-75.695,0\C,6,1.536925,2,112.71,3,76.294,0\C,9,1.486943,8,113.001,1,178.717,0\C,14,1.332191,9,123.788,8,1.868,0\H,4,1.099397,1,106.009,5,-69.312,0\H,4,1.095832,1,109.483,5,176.212,0\H,5,1.097104,1,109.344,4,-175.282,0\H,5,1.098903,1,106.129,4,69.864,0\H,1,1.094531,4,108.778,3,172.302,0\H,14,1.085143,9,113.773,8,-178.271,0\H,15,1.085705,14,121.102,9,0.42,0\H,15,1.08494,14,121.,9,-179.979,0\H,2,1.099766,3,109.299,4,174.602,0\H,2,1.100758,3,106.706,4,-71.106,0\H,13,1.096037,6,110.135,2,55.117,0\H,13,1.088158,6,112.909,2,-66.186,0\H,13,1.096325,6,109.814,2,173.797,0\H,7,1.095881,6,110.665,2,-62.,0\H,7,1.09594,6,110.778,2,178.392,0\H,7,1.095386,6,111.293,2,58.111,0\H,11,1.096065,3,110.662,2,62.679,0\H,11,1.095397,3,111.297,2,-57.469,0\H,11,1.095676,3,110.739,2,-177.704,0\H,12,1.096157,3,110.303,2,-52.54,0\H,12,1.096274,3,109.573,2,-171.024,0\H,12,1.089252,3,113.387,2,69.171,0\Version=ES64L-G09RevD.01\HF=-658.8284687\RMSD=4.852e-09\Dipole=-0.4480236,-0.4472562,0.6013804\Quadrupole=-2.3744804,5.9093202,-3.5348398,-1.5987973,1.800037,2.3018758\PG=C01 [X(C13H22O2)]\@

#### Model I.5

1\1\GINC-R39\FOpt\RM062X\6-31+G(d,p)\C13H22O2\ROOT\11-Dec-2017\0\#M062X/6-31+G(d,p) SCF=Tight INT(grid=ultrafine) OPT IOP(2/17=4) maxdisk=5GB\Modell.5.freq\0,1\C,-0.0183344546,0.7106532964,-0.8998047083\C,-0.5108098023,-0.6548584098,-0.3968934826\C,0.5095879931,-1.4032069649,0.4644941096\C,1.9622631799,-1.1243398614,0.0563800566\C,2.2623179688,0.3960934298,0.1599696085\C,1.0577996123,1.361622583,-0.0203909482\C,2.2167505307,-1.6390762799,-1.3706022915\C,2.8968879707,-1.885331571,1.0034093889\C,1.5460249951,2.6438262188,-0.7049471037\C,0.4590605362,1.7556026804,1.3406576144\H,-0.8805739889,1.3796837628,-0.9995794\H,0.3764466927,0.5853280044,-1.9146254977\H,0.3082031795,-2.4801982729,0.4172774733\H,0.3671941079,-1.1078190353,1.5094657321\H,1.6239701735,-1.1114134413,-2.1228710181\H,1.9758885048,-2.705919425,-1.4421643746\H,3.2721582959,-1.5137394858,-1.6360487549\H,2.7140244935,-1.6015794383,2.0454829057\H,3.9445939174,-1.6631340609,0.7710373463\H,2.7529213016,-2.9679470231,0.9132444549\H,1.9391614579,2.429862724,-1.7048576225\H,2.3458067314,3.1126978977,-0.1202409566\H,0.7315101276,3.3697633506,-0.8065075559\H,0.095123428,0.8963486641,1.9083608071\H,-0.3882330116,2.4362548224,1.1994738971\H,1.2103956084,2.2712328382,1.9492453381\O,-1.6821298998,-0.4993676551,0.4391555158\H,-0.8128315439,-1.2591581892,-1.2570327468\C,-2.8500777498,-0.2925365823,-0.1898051565\O,-2.9695753068,-0.2347436986,-1.3933852788\C,-3.962925286,-0.146252257,0.7876718622\C,-5.2038779521,0.0706069089,0.357251321\H,-3.7075985294,-0.2239151207,1.8394085209\H,-5.4039455102,0.1400137686,-0.7081982442\H,-6.0325221322,0.1807911817,1.0481591319\H,2.7161059083,0.6047930791,1.1380616604\H,3.0322084524,0.6376915618,-0.5851416041\Version=ES64L-G09RevD.01\State=1-A\HF=-658.8228804\RMSD=9.794e-09\RMSF=2.756e-06\Dipole=0.2461063,-0.0064456,0.5980213\Quadrupole=4.0256457,-1.1301829,-2.8954629,-1.1684018,-5.142774,0.0495096\PG=C01 [X(C13H22O2)]\@

#### Model I.6

1\1\GINC-R39\FOpt\RM062X\6-31+G(d,p)\C13H22O2\ROOT\11-Dec-2017\0\#M062X/6-31+G(d,p) SCF=Tight INT(grid=ultrafine) OPT IOP(2/17=4) maxdisk=5GB\Modell.6.freq\0,1\C,0.4549251264,1.0081245886,-1.1487016249\C,-0.5481156626,-0.082993632,-0.7635909483\C,-0.0051005215,-1.0957706154,0.2544137987\C,1.509596889,-1.3181294372,0.1364911493\C,2.2699673478,0.0241858462,0.316143508\C,1.5053542938,1.3197363586,-0.0736082774\C,1.8398703891,-1.9596184078,-1.2223115798\C,1.9508077938,-2.294054465,1.233325467\C,2.5026433239,2.3383485694,-0.6377255975\C,0.8330293196,1.9516508929,1.1567564668\H,-0.1062077041,1.9159959526,-1.3999117246\H,0.9715307757,0.7017294055,-2.0653885773\H,-0.5368918629,-2.0459349756,0.1384936035\H,-0.234750032,-0.7288502548,1.2617298111\H,1.6003595596,-1.3083914556,-2.0676107654\H,1.2803546743,-2.8929082881,-1.3507382744\H,2.9082703749,-2.1948403474,-1.2811246334\H,1.6844422893,-1.9139575055,2.2255102293\H,3.0369954715,-2.4382254472,1.2064029518\H,1.4756955231,-3.2727335769,1.1032469016\H,2.9759170604,1.9610308707,-1.5509631716\H,3.2940677342,2.5470992388,0.0910813072\H,2.0052095227,3.2852730447,-0.8763334094\H,0.1231830497,1.2787207729,1.6426112555\H,0.2

823909202,2.8541002482,0.8686438515\H,1.5908843186,2.2359065152,1.8954095635\O,-1.7051229841,0.58671651,-0.2050417522\H,-0.8915585251,-0.6069071291,-1.6611684826\C,-2.8493703372,-0.1143534648,-0.1764992259\O,-2.9591640809,-1.2476018111,-0.5884886661\C,-3.9522655088,0.6890814904,0.4184253831\C,-5.1710672714,0.1659076089,0.5324910742\H,-3.70845714,1.6952743386,0.7433117944\H,-5.3599859893,-0.8477862825,0.1907983517\H,-5.992299663,0.7295355333,0.9615023816\H,2.5808684302,0.1219530999,1.3649112099\H,3.1987630948,-0.0351737898,-0.2672233489\Version=ES64L-G09RevD.01\State=1-A\HF=-658.8229338\RMSD=4.205e-09\RMSF=2.770e-06\Dipole=0.221462,0.5330286,0.2194211\Quadrupole=3.652456,-2.4619313,-1.1905247,-4.2555251,-3.2151358,-0.3540688\PG=C01 [X(C13H22O2)]\@

### Model m.1

1\1\GINC-R37\SP\RM062X\6-31+G(d,p)\C11H20O2\ROOT\14-Jul-2017\0\#M062X\6-31+G(d,p) INT(grid=ultrafine) Nosymm maxdisk=12GB\CycloM.lined.ext.retry.freq\0,1\C\C,1,2.922664\C,2,1.543709,1,61.006\C,1,1.537473,2,59.237,3,28.792,0\C,1,1.537474,4,110.106,3,-58.834,0\C,2,1.543709,3,118.102,4,-48.41,0\C,6,1.536908,2,113.056,3,-75.293,0\C,1,1.509286,5,110.725,6,-178.384,0\O,8,1.207734,1,125.723,5,118.789,0\C,6,1.534991,2,107.878,3,166.193,0\C,3,1.536909,2,113.056,6,75.293,0\C,3,1.534991,2,107.878,6,-166.193,0\O,8,1.351866,1,112.468,5,-61.211,0\H,5,1.09817,1,108.111,4,-61.839,0\H,5,1.098074,1,110.223,4,-178.605,0\H,4,1.098074,1,110.223,5,178.605,0\H,4,1.09817,1,108.111,5,61.839,0\H,1,1.094053,5,110.257,6,-63.043,0\H,13,0.96932,8,107.156,1,180.,0\H,2,1.100256,6,106.7,5,-71.611,0\H,2,1.099614,6,109.252,5,174.033,0\H,11,1.095661,3,110.583,2,50.301,0\H,11,1.090977,3,113.455,2,-70.838,0\H,11,1.095664,3,109.813,2,169.189,0\H,12,1.096008,3,110.686,2,-62.313,0\H,12,1.095677,3,110.792,2,178.027,0\H,12,1.095147,3,111.182,2,57.798,0\H,10,1.096008,6,110.687,2,62.313,0\H,10,1.095148,6,111.182,2,-57.798,0\H,10,1.095677,6,110.792,2,-178.027,0\H,7,1.095661,6,110.583,2,-50.301,0\H,7,1.095664,6,109.813,2,-169.189,0\H,7,1.090978,6,113.455,2,70.838,0\Version=ES64L-G09RevD.01\HF=-581.4746497\RMSD=8.460e-09\Dipole=-0.0691806,-0.3455003,0.7317477\Quadrupole=0.9238278,1.303699,-2.2275268,0.0792556,0.8346786,4.1657977\PG=C01 [X(C11H20O2)]\@

### Model m.2

1\1\GINC-R37\SP\RM062X\6-31+G(d,p)\C11H20O2\ROOT\15-Jun-2017\0\#M062X\6-31+G(d,p) INT(grid=ultrafine) Nosymm maxdisk=12GB\CycloM.ext.retry.freq\0,1\C\C,1,2.920397\C,2,1.5438,1,60.89\C,1,1.52791,2,59.337,3,-28.58,0\C,1,1.541032,4,110.753,3,57.981,0\C,2,1.543529,3,118.059,4,48.497,0\C,6,1.534965,2,107.936,3,-166.342,0\C,1,1.51033,5,109.073,6,179.87,0\O,8,1.351434,1,111.905,5,-70.118,0\C,3,1.534805,2,107.837,6,166.415,0\C,3,1.537333,2,112.986,6,-75.194,0\C,6,1.536894,2,113.076,3,75.046,0\O,8,1.207411,1,126.137,5,108.627,0\H,4,1.098113,1,107.931,8,58.144,0\H,4,1.097087,1,110.185,8,-57.497,0\H,5,1.096484,1,110.126,8,56.951,0\H,5,1.09994,1,107.943,8,-59.898,0\H,1,1.097337,8,106.222,13,-134.302,0\H,9,0.96948,8,107.215,1,178.13,0\H,2,1.100232,3,106.685,4,-71.495,0\H,2,1.099675,3,109.331,4,174.12,0\H,11,1.095703,3,109.768,2,-168.964,0\H,11,1.09577,3,110.684,2,-50.06,0\H,11,1.091277,3,113.452,2,71.093,0\H,10,1.095621,3,110.743,2,-177.99,0\H,10,1.095082,3,111.143,2,-57.905,0\H,10,1.096095,3,110.766,2,62.277,0\H,12,1.095628,6,109.843,2,177.899,0\H,7,1.095972,6,110.672,2,-62.425,0\H,7,1.095149,6,111.176,2,57.638,0\Version=ES64L-G09RevD.01\HF=-581.4756431\RMSD=8.152e-09\Dipole=-0.3105374,-0.5421487,0.2983255\Quadrupole=0.4815078,-3.6801043,3.1985965,-1.9780699,1.877575,1.21013\PG=C01 [X(C11H20O2)]\@

### Model m.3

1\1\GINC-R41\FOpt\RM062X\6-31+G(d,p)\C11H20O2\ROOT\10-Dec-2017\0\#M062X\6-31+G(d,p) SCF=Tight INT(grid=ultrafine) OPT IOP(2/17=4) maxdisk=5GB\ModelM.3.freq\0,1\C,-0.5970640317,0.8139253399,-0.9885745459\C,-1.1444644557,-0.5905096476,-0.6113814558\C,-0.1684058192,-1.4218315276,0.2362076407\C,1.3055035665,-1.1169033117,-0.0602532074\C,1.6022460721,0.3860411083,0.1934697868\C,0.4144660425,1.3717331024,0.021597965\C,1.6457954268,-1.5079822251,-1.5080217594\C,2.1820516448,-1.9619895707,0.8712059834\C,0.9483023676,2.7085722978,-0.5061514389\C,-0.2804419526,1.6380968423,1.3674264403\H,-1.4293657629,1.5171324626,-1.1054370738\H,-0.1146423497,0.7542194672,-1.969878655\H,-0.3619937686,-2.4889631143,0.0708626977\H,-0.3697405344,-1.244836305,1.2971235075\H,1.093642952,-0.9197582846,-2.2462450084\H,1.4156898337,-2.5654240937,-1.6824113514\H,2.7139143291,-1.3602360838,-1.7018475179\H,1.9366812508,-1.7683924611,1.9208905499\H,3.2422559814,-1.7275037401,0.7218662012\H,2.0422690735,-3.0319413732,0.679807786\H,1.4016142021,2.5878405393,-1.4962218123\H,1.7129453642,3.110346941,0.1683962975\H,0.1449860061,3.4497586508,-0.5855230304\H,-0.6606667227,0.7289212292,1.8395696453\H,-1.1287666162,2.3193972699,1.2300194922\H,0.4184642812,2.1106685058,2.0663646871\C,-2.4893065901,-0.4826005171,0.079686936\H,-1.3579450088,-1.1137600113,-1.5516998844\O,-2.7519037938,-0.8310263638,1.2058360983\O,-3.4246266946,0.0628144123,-0.7292530467\H,-4.2507955972,0.1038572124,-0.2238736905\H,2.418427434,0.686117856,-0.4777753452\H,1.9924738697,0.5068253935,1.2128571083\Version=ES64L-G09RevD.01\State=1-A\HF=-581.4682473\RMSD=9.364e-09\RMSF=3.694e-06\Dipole=0.1814572,0.2

250792,-0.5292103\Quadrupole=2.8205023,0.0951631,-2.9156654,-1.8035855,2.1615939,1.986216\PG=C01 [X(C11H20O2)]\@

#### Model m.4

1\1\GINC-R41\FOpt\RM062X\6-31+G(d,p)\C11H20O2\ROOT\10-Dec-2017\0\#M062X\6-31+G(d,p) SCF=Ti  
ght INT(grid=ultrafine) OPT IOP(2/17=4) maxdisk=12GB\ModellM.4.freq\0,1\C,-1.1892712374,0.232634143  
6,-1.0925454549\C,-0.5538318744,-1.1676133316,-1.1205054744\C,-0.1272301786,1.3402219142,-1.1026498  
402\C,1.0224481841,1.1904281327,-0.0827815324\C,0.505576407,-1.4037496719,-0.0310597607\C,1.542303  
8128,-0.2631131118,-0.090408175\H,-0.0642809774,-1.2748443002,-2.0981017515\H,-1.3306114488,-1.93768  
83978,-1.0650204484\H,-0.6084311413,2.3159010368,-0.9722759435\H,0.3166549339,1.3316381272,-2.1073  
605418\C,0.6193313031,1.6677583607,1.3222206274\C,2.173763579,2.0999635886,-0.5403005688\C,1.2323  
397162,-2.7194337362,-0.3424193088\C,-0.143980508,-1.5594117871,1.3526038795\H,-0.2485787184,1.1569  
090499,1.7329465564\H,0.3700398365,2.7338712939,1.2938421976\H,1.4582979375,1.5319748468,2.014759  
0572\H,2.5323132807,1.8181652059,-1.536353421\H,3.0180143383,2.0343835354,0.1553503184\H,1.849522  
7863,3.1459869904,-0.5781664265\H,1.7210594992,-2.6794737093,-1.3219626697\H,0.5301152508,-3.56062  
0365,-0.3464679743\H,2.0009024255,-2.9252024814,0.4112060412\H,-0.7821160525,-0.7213628629,1.63496  
46634\H,0.6268412108,-1.6580343439,2.1252696222\H,-0.7661760283,-2.460949767,1.3725839752\C,-2.247  
8282479,0.4259568646,-0.0255674535\H,-1.7770273246,0.3290369162,-2.0181108023\O,-2.4381307421,1.43  
27928804,0.6145524286\O,-3.0565694943,-0.6503118546,0.0939760461\H,-3.7391624178,-0.4202772974,0.7  
428699488\H,2.269901765,-0.389295991,0.7246422392\H,2.1053101251,-0.4007698719,-1.0262700534\Vers  
ion=ES64L-G09RevD.01\State=1-A\HF=-581.4722868\RMSD=9.411e-09\RMSF=3.055e-06\Dipole=0.053203  
6,-0.5322712,-0.3147452\Quadrupole=1.9511114,-3.0749624,1.123851,2.5219456,-0.0896776,-2.1215953\PG=  
C01 [X(C11H20O2)]\@

#### Model n

CycloN.r1.ext.retry11\1\GINC-R48\SP\RM062X\6-31+G(d,p)\C10H17N1O1\ROOT\14-Jul-2017\0\#M062X\6  
-31+G(d,p) INT(grid=ultrafine) Symmetry=None maxdisk=12GB\CycloN.r1.ext.retry1.freq\0,1\X\C,1,2.2811  
35\C,2,2.552323,1,77.115\H,3,1.095557,2,91.187,1,-82.637,0\C,3,2.502547,2,60.912,1,77.627,0\C,2,1.553592,  
3,33.951,5,33.328,0\C,6,1.52314,2,101.318,3,119.587,0\C,1,0.668815,7,179.999,6,1.011,0\C,8,1.511557,1,113.  
076,7,0.346,0\C,9,1.533267,2,111.921,6,136.92,0\C,9,1.537558,2,112.536,6,-99.78,0\C,7,1.492905,1,125.802,2,1  
75.797,0\N,12,1.368076,7,116.011,1,-25.393,0\O,12,1.222283,7,122.211,1,153.482,0\H,8,1.089447,1,125.333,2,-  
176.743,0\H,13,1.006748,12,120.816,7,-18.216,0\H,13,1.009168,12,116.726,7,-175.15,0\H,2,1.096922,9,108.8  
55,10,18.832,0\H,2,1.09604,9,112.017,10,-99.646,0\H,5,1.095951,6,109.653,2,64.654,0\H,5,1.094179,6,111.29  
1,2,-55.011,0\H,5,1.092329,6,110.347,2,-175.33,0\H,3,1.09577,6,109.925,2,-60.583,0\H,3,1.093373,6,110.692,  
2,179.604,0\H,10,1.095629,9,110.305,2,62.39,0\H,10,1.094606,9,110.962,2,-57.451,0\H,10,1.095808,9,111.083,2  
,178.053,0\H,11,1.095571,9,110.16,2,-66.404,0\H,11,1.095616,9,110.81,2,174.132,0\H,11,1.093196,9,111.395,2  
,53.837,0\Version=ES64L-G09RevD.01\HF=-521.0858619\RMSD=7.378e-09\Dipole=-0.969945,-1.0494292,-  
0.0394158\Quadrupole=-3.9659726,-1.2408006,5.2067733,-3.6742161,0.5815837,4.4698903\PG=Unknown\@

#### Model o.1

CycloO.ext.retry11\1\GINC-R111\SP\RM062X\6-31+G(d,p)\C10H16O2\ROOT\14-Jul-2017\0\#M062X\6-31+  
G(d,p) INT(grid=ultrafine) Symmetry=None maxdisk=12GB\CycloO.ext.retry1.freq\0,1\C,0,0,0,2.282908\C,  
0,1.274682,0,1.391195\C,0,2.086796,-1.296718,1.540869\C,0,0.663274,0.085275,0.00075\C,0,-0.663268,-0.08  
5304,-0.000744\C,0,-1.221757,-0.324262,1.380776\C,0,1.486277,0.256601,-1.214101\O,0,2.697578,0.283499,-  
1.232891\C,0,2.174317,1.199963,1.712512\C,0,-2.413172,0.595434,1.672682\C,0,-1.669201,-1.790379,1.5089  
1\O,0,0.755277,0.378335,-2.34397\H,0,1.38464,0.472442,-3.074736\H,0,-1.282341,-0.095374,-0.894826\H,0,0,0  
90251,-0.704661,3.11748\H,0,-0.13191,0.999017,2.715273\H,0,2.479002,1.161909,2.764475\H,0,1.640037,2.1  
41732,1.547704\H,0,3.07196,1.194588,1.089472\H,0,2.486301,-1.371861,2.558266\H,0,2.925257,-1.305469,0.  
838693\H,0,1.466754,-2.178521,1.351371\H,0,-2.06055,-1.976706,2.515008\H,0,-0.836574,-2.476848,1.33121  
\H,0,-2.460751,-2.021982,0.788017\H,0,-2.753538,0.45812,2.704909\H,0,-3.254262,0.372898,1.007026\H,0,-2.1  
38287,1.646369,1.539795\Version=ES64L-G09RevD.01\HF=-540.9544335\RMSD=7.236e-09\Dipole=-0.821  
1145,-0.1088385,0.1608704\Quadrupole=-4.6227232,-0.2886552,4.9113784,0.0706804,-0.1452941,-0.6219521  
\PG=Unknown\@

#### Model o.2

1\1\GINC-R38\FOpt\RM062X\6-31+G(d,p)\C10H16O2\ROOT\10-Dec-2017\0\#M062X\6-31+G(d,p) SCF=Ti  
ght INT(grid=ultrafine) OPT IOP(2/17=4) maxdisk=5GB\ModellO.2.freq\0,1\C,0.0307530046,0.0074411482,0.0  
032691657\C,0.0027551312,0.0078466176,2.3820042817\C,0.9961004495,0.0044255629,1.1833612142\C,-1.  
2374449234,-0.2096971297,0.3680032774\C,-1.3971266067,-0.4053119678,1.8543579722\C,-2.5109563908,0.4  
816569625,2.423053797\C,0.3901216777,0.1563006332,-1.4267700446\O,1.7255404148,0.202426356,-1.6370

955689\C,-1.7225095222,-1.8793646695,2.1503749119\C,1.8988335258,1.2442542506,1.2276108173\C,1.8702499263,-1.2604980812,1.1705391286\O,-0.3984316766,0.2252000223,-2.3418779284\H,1.8540133323,0.2923847769,-2.5939411291\H,-2.0650602155,-0.2786880069,-0.334704019\H,0.3455572134,-0.6458995195,3.1922646307\H,-0.0574947979,1.0241011694,2.7893904167\H,2.446488111,1.2659268879,2.1765616235\H,1.3041116723,2.1611707795,1.1582389644\H,2.6247249319,1.2378359098,0.4111690755\H,2.5166543691,-1.2757380199,2.0550371601\H,2.5054288274,-1.2834453272,0.2806304302\H,1.2573918545,-2.1669946503,1.1796012546\H,-1.8224403211,-2.0318379745,3.2306092439\H,-0.9356789923,-2.5428298953,1.7806408389\H,-2.651048843,-2.173664212,1.676591407\H,-2.5558774809,0.3808467614,3.5130557679\H,-3.4869722716,0.1958676935,2.0163196751\H,-2.3340163584,1.5346539225,2.1832936354\Version=ES64L-G09RevD.01\State=1-A\HF=-540.9528925\RMSD=9.299e-09\RMSF=7.915e-06\Dipole=0.2642708,-0.1301884,0.7192401\Quadrupole=1.8279744,-0.3695168,-1.4584576,0.9460601,-5.1553555,0.0913521\PG=C01 [X(C10H16O2)]\@

### Model p

CycloP.GOOD.retry1\1\GINC-R37\SP\RM062X\6-31+G(d,p)\C9H16O2\ROOT\17-Oct-2017\0\#M062X\6-31+G(d,p) SCF=Tight INT(grid=ultrafine) NoSymm maxdisk=8GB\CycloP.GOOD.retry.freq\0,1\O\C,1,2.887395\C,2,1.548477,1,60.153\C,1,1.349426,2,63.83,3,8.106,0\C,1,1.429143,4,121.239,3,-5.659,0\C,5,1.524024,1,112.473,4,-35.363,0\C,6,1.529667,5,108.704,1,-178.845,0\O,4,1.205613,1,118.24,5,176.607,0\C,6,1.533407,5,110.428,1,-58.51,0\C,3,1.541419,4,105.342,1,-105.464,0\C,3,1.536293,4,107.621,1,138.665,0\H,5,1.094005,1,104.956.4,-156.942,0\H,5,1.098702,1,108.927,4,87.104,0\H,9,1.093861,6,112.613,5,57.103,0\H,9,1.095217,6,110.38,5,-62.853,0\H,9,1.09516,6,110.19,5,177.78,0\H,7,1.095456,6,111.362,5,-57.029,0\H,7,1.094876,6,110.304,5,-176.806,0\H,7,1.09533,6,111.039,5,63.67,0\H,10,1.09545,3,111.297,4,61.724,0\H,10,1.092759,3,110.474,4,-58.97,0\H,10,1.095048,3,109.348,4,-178.918,0\H,11,1.094245,3,111.456,4,-68.497,0\H,11,1.094819,3,109.077,4,172.242,0\H,11,1.091347,3,110.565,4,52.175,0\H,2,1.097395,6,110.05,5,-175.503,0\H,2,1.09802,6,107.556,5,68.954,0\Version=ES64L-G09RevD.01\HF=-502.8610949\RMSD=3.794e-09\Dipole=-1.1437106,0.2287374,1.455147\Quadrupole=-2.6334977,0.2218617,2.411636,1.4545936,1.9791791,-0.5027794\PG=C01 [X(C9H16O2)]\@

### Model r

1\1\GINC-R37\SP\RM062X\6-31+G(d,p)\C9H18O1\ROOT\15-Jun-2017\0\#M062X\6-31+G(d,p) INT(grid=ultrafine) Nosymm maxdisk=12GB\CycloR.ext.retry.freq\0,1\O\C,1,2.829926\C,2,1.54354,1,59.77\C,1,1.41427,2,61.415,3,-30.237,0\C,1,1.414276,4,111.435,3,65.161,0\C,2,1.543553,3,116.352,4,45.471,0\C,6,1.531986,2,108.79,3,-163.481,0\C,6,1.534985,2,113.119,3,75.726,0\C,3,1.534987,2,113.118,6,-75.728,0\C,3,1.531992,2,108.79,6,163.479,0\H,5,1.104604,1,109.32,4,56.753,0\H,5,1.095325,1,106.543,4,173.562,0\H,4,1.095327,1,106.543,5,-173.564,0\H,4,1.104601,1,109.319,5,-56.755,0\H,2,1.099398,6,109.768,5,-170.859,0\H,2,1.100502,6,107.044,5,74.132,0\H,7,1.095955,6,110.941,2,177.072,0\H,7,1.095749,6,110.448,2,-63.528,0\H,7,1.095429,6,111.459,2,56.484,0\H,8,1.095864,6,109.887,2,166.329,0\H,8,1.090901,6,111.934,2,-74.35,0\H,8,1.095668,6,111.048,2,47.085,0\H,9,1.095862,3,109.888,2,-166.336,0\H,9,1.095668,3,111.047,2,-47.092,0\H,9,1.090903,3,111.935,2,74.342,0\H,10,1.095954,3,110.941,2,-177.08,0\H,10,1.09543,3,111.458,2,-56.492,0\H,10,1.095747,3,110.447,2,63.519,0\Version=ES64L-G09RevD.01\HF=-428.8464477\RMSD=9.606e-09\Dipole=-0.0341659,0.1850931,0.5209476\Quadrupole=1.0970307,-0.7915976,-0.3054332,0.360641,0.0178527,-0.0973893\PG=C01 [X(C9H18O1)]\@

### Cation 1.1

1\1\GINC-R40\FOpt\RM062X\6-31+G(d,p)\C9H16N1O3(+)\ROOT\06-Dec-2017\0\#M062X\6-31+G(d,p) SCF=Tight INT(grid=ultrafine) OPT IOP(2/17=4) maxdisk=12GB\Nitroxide.1.freq\1,1\C,-0.6649605043,-1.2588687498,0.1511544165\N,0.5638563301,-0.3805937496,0.1487883294\C,0.2949539994,1.0762470474,0.445821511\C,-1.1597637426,1.0170141092,0.9177918896\C,-0.5523699748,-2.0736729372,1.4556084932\C,-0.6460768655,-2.1467801208,-1.0858840477\C,0.4597553659,1.7842962745,-0.9135075773\C,1.3084325571,1.5659177622,1.4725086235\H,-1.6846858013,1.9446104483,0.6818772079\H,-1.2187105746,0.8726920031,2.0008652437\H,-0.2440706155,1.4137076847,-1.6637088147\H,1.4807344725,1.6711980183,-1.2849815297\H,0.258887667,2.8455916108,-0.7494999356\H,1.2496573853,0.9834822804,2.3957957665\H,1.0678779298,2.6053974954,1.7083079356\H,2.3255882118,1.5254757736,1.0777104472\H,0.3611220712,-2.672246783,1.4454470028\H,-1.4112314358,-2.7485659321,1.4928503125\H,-0.5700343679,-1.4404312191,2.3468408562\H,-0.5984391649,-1.5498111298,-2.0008992171\H,-1.5778801963,-2.7169368141,-1.0947917153\H,0.1963204539,-2.8407145768,-1.0586656361\C,-1.7782801133,-0.1873269047,0.1968905128\C,-3.020461993,-0.7015585054,0.906687225\H,-2.066652689,0.0622165385,-0.8308523745\O,-3.4121319419,-0.2974254751,1.9670598657\O,-3.6021003463,-1.6808400929,0.2004672222\H,-4.4030813083,-1.975159035,0.6670216929\O,1.6432951912,-0.8023350211,-0.0689437059\Version=ES64L-G09RevD.01\State=1-A\HF=-632.4842042\RMSD=5.254e-09\RMSF=1.159e-05\Dipole=0.8866947,0.1622395,-0.6526013\Quadrupole=0.9773906,5.2680992,-6.2454898,7.605887,2.4339621,-1.5228205\PG=C01 [X(C9H16N1O3)]\@

### Cation 1.2

1\1\GINC-R40\FOpt\RM062X\6-31+G(d,p)\C9H16N1O3(1+)\ROOT\06-Dec-2017\0\#M062X\6-31+G(d,p) S  
CF=Tight INT(grid=ultrafine) OPT IOP(2/17=4) maxdisk=12GB\Nitroxide.1b.freq\1,1\C,-0.6777774358,-1.25  
69403101,0.1021927703\N,0.5413080507,-0.3709076561,0.0519975442\C,0.290735199,1.0660449519,0.4618  
682125\C,-1.1658728851,0.9966377142,0.9355943016\C,-0.498987756,-2.0488451374,1.4176364107\C,-0.70  
26336249,-2.1717284753,-1.1122237412\C,0.4644591402,1.8832062038,-0.8311835709\C,1.3155224527,1.45  
23797558,1.523250411\H,-1.6905673779,1.9313075057,0.7320949665\H,-1.2131777539,0.817643016,2.0141  
738338\H,-0.2540299395,1.5955052362,-1.6035507146\H,1.4789385376,1.7740349733,-1.2210388406\H,0.29  
51105542,2.9321337547,-0.577535829\H,1.2506222813,0.7971402234,2.3960347903\H,1.0947270146,2.4734  
690301,1.8437920106\H,2.330290119,1.4260278076,1.1210189295\H,0.4312350161,-2.6200275199,1.377159  
4091\H,-1.3424316565,-2.7361804506,1.495607538\H,-0.4897012117,-1.4020303163,2.299200947\H,-0.7036  
584586,-1.5970360842,-2.0427335034\H,-1.6260072985,-2.7533373865,-1.0560087291\H,0.14799915,-2.8559  
200348,-1.108648376\C,-1.777392301,-0.1810062743,0.1576426809\C,-3.0934412679,-0.7028303875,0.70479  
72722\H,-2.0021017317,0.1395412051,-0.8697276858\O,-3.4163878832,-1.8622861521,0.6947636161\O,-3.8  
555457681,0.2968038493,1.151213924\H,-4.7123040859,-0.0610441139,1.4404750824\O,1.6049709206,-0.76  
33549278,-0.2721836603\Version=ES64L-G09RevD.01\State=1-A\HF=-632.4840327\RMSD=6.383e-09\RM  
SF=7.194e-06\Dipole=0.8216399,0.9732558,-0.012115\Quadrupole=2.5836161,-0.183161,-2.400455,0.818593  
9,-1.3201105,0.3392997\PG=C01 [X(C9H16N1O3)]\@

### Cation 1.3

1\1\GINC-R40\FOpt\RM062X\6-31+G(d,p)\C9H16N1O3(1+)\ROOT\06-Dec-2017\0\#M062X\6-31+G(d,p) S  
CF=Tight INT(grid=ultrafine) OPT IOP(2/17=4) maxdisk=12GB\Nitroxide.1c.freq\1,1\C,-0.8471834433,-1.22  
07262463,-2.482064249\N,-1.5117145224,-2.4644812478,-1.9534463608\C,-3.0047667696,-2.5209434725,-2.  
2036534417\C,-3.2835372113,-1.0971239945,-2.7264504189\C,-0.4868343731,-1.5366309679,-3.9516615376  
\C,0.4075141994,-0.9178173669,-1.6762220571\C,-3.6943979787,-2.8840387145,-0.8837890089\C,-3.231323  
0511,-3.6291155832,-3.2442298289\H,-4.1782429594,-0.6827629754,-2.2564215494\H,-3.4589399627,-1.114  
0287562,-3.804472754\H,-3.5087841493,-2.1364973593,-0.1128508986\H,-3.3569883124,-3.8629940153,-0.5  
365120179\H,-4.7668867905,-2.9402690742,-1.084613569\H,-2.6935886393,-3.4431238579,-4.1763141216\H,-  
4.3013696678,-3.6524024237,-3.4649191672\H,-2.9393335936,-4.6012709006,-2.8408393715\H,0.144936892,-  
2.4264161063,-4.007960637\H,0.0853557552,-0.6835704506,-4.3241210663\H,-1.3623128951,-1.6659039524,-  
4.5894110663\H,0.2057663606,-0.8927031201,-0.6052628591\H,0.7820544486,0.0591417309,-1.9935296431\  
H,1.1806294968,-1.6609643921,-1.8808791737\C,-2.0262627933,-0.2337560654,-2.4105131525\C,-2.1678378  
919,0.3341180366,-1.0118306346\O,-0.9184217325,-3.3338664551,-1.4245595731\H,-1.9024413781,0.57066  
65392,-3.1377756087\O,-2.0555862861,-0.3542708201,-0.0225876646\O,-2.4702438341,1.6250631868,-1.007  
1047324\H,-2.5905389169,1.9284488246,-0.0904838365\Version=ES64L-G09RevD.01\State=1-A\HF=-632.4  
853751\RMSD=6.563e-09\RMSF=1.046e-05\Dipole=-0.1900812,-0.1198799,-1.1282778\Quadrupole=1.49158  
73,2.1320338,-3.6236211,2.9475767,-2.4383174,4.9085579\PG=C01 [X(C9H16N1O3)]\@

### Nitroxide 1.1

1\1\GINC-R38\FOpt\UM062X\6-31+G(d,p)\C9H16N1O3(2)\ROOT\04-Dec-2017\0\#M062X\6-31+G(d,p) SC  
F=Tight INT(grid=ultrafine) OPT IOP(2/17=4) maxdisk=12GB\Nitroxide.1.freq\0,2\C,-0.6347966131,-1.2582  
101086,0.1768199338\N,0.5469738751,-0.3718032896,0.1120190369\C,0.2993503535,1.0590821528,0.39742  
42284\C,-1.1565566428,1.024992624,0.8813439916\C,-0.5604653118,-2.0856424837,1.4652694195\C,-0.666  
7103342,-2.1623598828,-1.0493486061\C,0.4707754506,1.8541402941,-0.9012361598\C,1.2779844743,1.545  
3060914,1.4613868163\H,-1.6940778329,1.944671743,0.6358785757\H,-1.2023312421,0.8942119217,1.9671  
040178\H,-0.264408863,1.5474377121,-1.6524246689\H,1.4711745414,1.6808924664,-1.30696585\H,0.34634  
25403,2.9241506874,-0.7086719698\H,1.1921260519,0.9385259864,2.3675589323\H,1.0646061892,2.588242  
4263,1.7142516168\H,2.3030343765,1.4702243621,1.0905582257\H,0.386908956,-2.6306325028,1.47646216  
99\H,-1.3823479827,-2.8075257788,1.5063635785\H,-0.6083973112,-1.4487690701,2.3539997623\H,-0.6619  
914142,-1.5645973268,-1.9658224792\H,-1.5678314286,-2.7806706463,-1.0329121214\H,0.2168517824,-2.80  
50675599,-1.0531158938\C,-1.7715016512,-0.2020140793,0.1988095508\C,-3.0096628248,-0.704919244,0.89  
75719522\H,-2.046947014,0.0204663315,-0.8390831155\O,-3.413032216,-0.3394211945,1.9738123476\O,-3.  
6353071477,-1.6598593832,0.1779066905\H,-4.4077797396,-1.9488917029,0.6886362921\O,1.7075669786,-0.8  
27380546,-0.1058362738\Version=ES64L-G09RevD.01\State=2-A\HF=-632.7465987\S2=0.755238\S2-1=0\ S  
2A=0.750018\RMSD=8.631e-09\RMSF=1.219e-05\Dipole=-0.9195991,0.2026617,-0.2472091\Quadrupole=-3.  
7100291,5.3208315,-1.6108024,5.490355,4.2726782,-1.9152245\PG=C01 [X(C9H16N1O3)]\@

### Nitroxide 1.2

1\1\GINC-R51\FOpt\UM062X\6-31+G(d,p)\C9H16N1O3(2)\ROOT\04-Dec-2017\0\#M062X\6-31+G(d,p) SC  
F=Tight INT(grid=ultrafine) OPT IOP(2/17=4) maxdisk=12GB\Nitroxide.1b.freq\0,2\C,-0.6503213741,-1.253

957997,0.1175637847\N,0.5213122478,-0.3564835362,-0.0059250653\C,0.2938073919,1.050392321,0.4031946491\C,-1.1673137119,1.0085505886,0.8796293995\C,-0.5190435743,-2.0558469494,1.4187565355\C,-0.7151347552,-2.1841477817,-1.0863824917\C,0.4848861621,1.9489204785,-0.8219682492\C,1.2747545732,1.4296335492,1.5090107999\H,-1.7017331459,1.9349786989,0.6580099901\H,-1.2113681438,0.8522056062,1.9627706533\H,-0.2568274014,1.7237089617,-1.5951945744\H,1.4808896498,1.7860664804,-1.2424639356\H,0.3862777861,3.0013904109,-0.5390311\H,1.1785913469,0.7479031526,2.3594319696\H,1.0740847672,2.449735048,1.8504469249\H,2.3000916392,1.3725326066,1.1362284801\H,0.4511340216,-2.559823,1.414740803\H,-1.3142572597,-2.8002375433,1.4917240173\H,-0.562308514,-1.4046408087,2.2985290327\H,-0.7485899284,-1.607741061,-2.0161215008\H,-1.6087049208,-2.8093279255,-1.0162994703\H,0.1739377249,-2.8189627951,-1.1085282625\C,-1.7748478029,-0.2008305942,0.1491506383\C,-3.0858458527,-0.6993688917,0.7037610335\H,-1.9963297298,0.0869176497,-0.8896754168\O,-3.4827517708,-1.8381309168,0.6509832604\O,-3.8214360106,0.294608544,1.2397724582\H,-4.6627846939,-0.0926484303,1.5283900339\O,1.6837312795,-0.8069958651,-0.2248243975\Version=ES64L-G09RevD.01\State=2-A\HF=-632.744731\S2=0.755189\S2-1=0.\S2A=0.750018\RMSD=7.220e-09\RMSF=3.730e-06\Dipole=-0.984075,1.0074008,0.3783878\Quadrupole=-2.7621087,0.1293737,2.632735,-0.4277692,0.5593776,-0.5424424\PG=C01 [X(C9H16N1O3)]\@

### Nitroxide 1.3

1\1\GINC-R51\FOpt\UM062X\6-31+G(d,p)\C9H16N1O3(2)\ROOT\04-Dec-2017\0\#M062X/6-31+G(d,p) SCF=Tight INT(grid=ultrafine) OPT IOP(2/17=4) maxdisk=12GB\Nitroxide.1c.freq\0,2\C,-0.928368747,-1.2205349845,-2.4489026765\N,-1.533827872,-2.4867512255,-1.9864149878\C,-2.9924097114,-2.6119720941,-2.2187705667\C,-3.3679478293,-1.1962332291,-2.7050180821\C,-0.4083110213,-1.3992941695,-3.8814466574\C,0.2159926534,-0.8466402469,-1.5138618481\C,-3.6639272443,-3.0076133962,-0.9029206454\C,-3.245239769,-3.6826518237,-3.2826309704\H,-4.2628157741,-0.8284693454,-2.1976261804\H,-3.5712058283,-1.2125362987,-3.7798291661\H,-3.5264739771,-2.2290246445,-0.1504704103\H,-3.2263742021,-3.9428206617,-0.5426192462\H,-4.7356494701,-3.1600384865,-1.0654438692\H,-2.7286867283,-3.4416460457,-4.2168292681\H,-4.3181679668,-3.7558054435,-3.4855592402\H,-2.883271399,-4.6504664077,-2.9274966019\H,0.2809247995,-2.2475767783,-3.9088585705\H,0.1212437298,-0.4981549718,-4.204864284\H,-1.2261800046,-1.5916660538,-4.5827021464\H,-0.1278555312,-0.7836124953,-0.4771555719\H,0.6482022802,0.1134719851,-1.80636921\H,0.9822831617,-1.6232026607,-1.5673871508\C,-2.158590622,-0.2737581417,-2.4356801541\C,-2.2855559423,0.4605522442,-1.1200877851\O,-0.8134365315,-3.505153136,-1.7683581038\H,-2.0397987241,0.4832248439,-3.2156676952\O,-2.9412444799,0.1090955816,-0.1692089406\O,-1.5560999575,1.5939786004,-1.1093804687\H,-1.6584872914,1.9970594854,-0.232919502\Version=ES64L-G09RevD.01\State=2-A\HF=-632.7439177\S2=0.755139\S2-1=0.\S2A=0.750017\RMSD=5.989e-09\RMSF=1.873e-05\Dipole=-0.2842181,1.1479306,-0.7841636\Quadrupole=0.1749742,-0.7351175,0.5601432,4.5894057,1.883655,2.6807666\PG=C01 [X(C9H16N1O3)]\@

### Cation 4b.1

1\1\GINC-R80\FOpt\RM062X\6-31+G(d,p)\C13H16N1O3(1+)\ROOT\05-Dec-2017\0\#M062X/6-31+G(d,p) SCF=Tight INT(grid=ultrafine) OPT IOP(2/17=4) maxdisk=12GB\Cat9.freq\1,1\C,0.2154589158,0.4729129724,0.0272874792\C,0.6813730652,-0.840987297,0.0369462467\C,2.1848795105,-0.9222499443,0.0019829764\N,2.5259901304,0.555117672,-0.0297285566\C,1.3295012232,1.4859841834,-0.0156795444\C,-1.145634637,0.7477559627,0.0557280739\C,-2.0327340206,-0.3289958056,0.0942376922\C,-1.5679829143,-1.6476812629,0.1040017665\C,-0.2024554047,-1.9144421092,0.0753197274\C,1.3897930103,2.3161155445,-1.3047412321\C,1.4512057454,2.3565704104,1.2419810825\C,2.7610229228,-1.5445786208,-1.2768168468\C,2.8224472667,-1.504059485,1.2706717813\H,-1.5284602363,1.7639153797,0.0487964413\C,-3.516019833,-0.1182820301,0.1266460175\H,-2.2965947877,-2.4514194911,0.1343460672\H,0.1560478146,-2.9396119205,0.0829732142\H,1.3571229409,1.6785495976,-2.1913901767\H,2.2869419174,2.9392933693,-1.3209522076\H,0.5103232006,2.9643744749,-1.3176172183\H,1.4617905826,1.7474968381,2.1489658468\H,0.5728768744,3.005577411,1.2766354793\H,2.3476136249,2.9792657868,1.1951484635\H,2.3349218606,-1.0840849163,-2.1712834104\H,2.4918255238,-2.6034517236,-1.276287118\H,3.8500069488,-1.4582894547,-1.2903827576\H,2.4395873357,-1.0150435758,2.1695425149\H,3.9107539112,-1.4182192384,1.2290006157\H,2.5543445759,-2.5622070278,1.3167654413\O,-4.3152437781,-1.0170774478,0.160205094\O,-3.848254711,1.181741436,0.1139811892\H,-4.8167163467,1.2456881891,0.136310598\O,3.6360477677,0.9486621229,-0.0628347404\Version=ES64L-G09RevD.01\State=1-A\HF=-784.8644807\RMSD=5.569e-09\RMSF=1.627e-05\Dipole=2.6001526,0.6851207,-0.0735645\Quadrupole=5.4736482,3.4902851,-8.9639332,-8.1856588,-0.2179134,-0.0006977\PG=C01 [X(C13H16N1O3)]\@

### Cation 4b.2

1\1\GINC-R44\FOpt\RM062X\6-31+G(d,p)\C13H16N1O3(1+)\ROOT\06-Dec-2017\0\#M062X/6-31+G(d,p) SCF=XQC INT(grid=ultrafine) OPT IOP(2/17=4) maxdisk=12GB\Cat9.b.freq\1,1\C,-0.0577151097,0.432760



9534,0.0014349655\C,-0.4204907878,-0.914730897,0.0018884811\C,-1.9138503431,-1.1103885604,0.002188  
8342\N,-2.3677724046,0.3371065537,0.0018389784\C,-1.2466653274,1.3570234129,0.0013579229\C,1.27655  
01283,0.8084546691,0.0011078045\C,2.2465879896,-0.1952768927,0.0012437437\C,1.888306903,-1.5462434  
736,0.0016975449\C,0.5439535789,-1.9153520421,0.0020244202\C,-1.4018539655,2.1988983636,1.27506305  
71\C,-1.4022686826,2.1981525027,-1.2727893078\C,-2.4733472913,-1.7566281534,1.2766690099\C,-2.47376  
20975,-1.7573741745,-1.2717305539\H,1.5976108252,1.8469624186,0.0007515312\C,3.6789180651,0.246355  
6783,0.0008813175\H,2.6653660968,-2.3023910287,0.0017924174\H,0.2657924163,-2.9652362696,0.002377  
041\H,-1.3424925953,1.5784755241,2.1724218251\H,-2.3439197806,2.7517146474,1.2592645022\H,-0.57424  
42806,2.9119970237,1.2976131306\H,-1.3431993849,1.5772043763,-2.1698039526\H,-0.5746664505,2.91123  
7759,-1.2960263047\H,-2.3443293574,2.7509780312,-1.2570077379\H,-2.1051118726,-1.252887911,2.17350  
07556\H,-2.1256790517,-2.7921748358,1.2990626412\H,-3.5656760627,-1.7521336773,1.2625226857\H,-2.1  
058187032,-1.2541591325,-2.1689769055\H,-3.5660862062,-1.7528713127,-1.2572312649\H,-2.1261010678,-  
2.7929338237,-1.2936310669\O,4.0126094246,1.4042646428,0.0004880347\O,4.5333473901,-0.7831067003,  
0.0010436069\H,5.4376823658,-0.4300263748,0.000793046\O,-3.5054993285,0.6436998608,0.0019344152\|  
Version=ES64L-G09RevD.01\State=1-A\HF=-784.8653439\RMSD=7.447e-09\RMSF=8.725e-05\Dipole=-2.3  
472467,-0.566778,0.000548\Quadrupole=9.7449737,0.3935614,-10.138535,-3.9178759,-0.0020895,-0.0024455  
\PG=CS [SG(C9H4N1O3),X(C4H12)]\@

#### Nitroxide 4b.1

1\1\GINC-R48\FOpt\UM062X\6-31+G(d,p)\C13H16N1O3(2)\ROOT\05-Dec-2017\0\#M062X\6-31+G(d,p) S  
CF=Tight INT(grid=ultrafine) OPT IOP(2/17=4) maxdisk=12GB\Nitroxide9.freq\0,2\C,0.2266069113,0.4783  
73512,0.0255544579\C,0.6929733118,-0.8377872955,0.0350398024\C,2.200112542,-0.8943685787,-0.002498  
6189\N,2.5193930614,0.5517525119,-0.034273797\C,1.3602574619,1.4742097904,-0.0195476919\C,-1.13519  
32956,0.7470261766,0.055942373\C,-2.0279390645,-0.3285595061,0.0962059088\C,-1.5621898442,-1.64786  
3027,0.1057591017\C,-0.1957931954,-1.9086270879,0.0751230673\C,1.365091069,2.3200050134,-1.2955148  
496\C,1.4295752644,2.3607886069,1.2265127796\C,2.7419354693,-1.564683269,-1.267991015\C,2.80630741  
92,-1.5234743853,1.2549273001\H,-1.5125343579,1.7651858528,0.0490260625\C,-3.5002456197,-0.1161954  
314,0.1303287007\H,-2.2891487295,-2.4527629493,0.1373902286\H,0.1671382417,-2.9327427581,0.0825011  
006\H,1.3033313092,1.6820359586,-2.1813102961\H,2.2901448145,2.9008774314,-1.3401606277\H,0.51268  
87168,3.0058756067,-1.2962527537\H,1.413717174,1.7518225693,2.1344576482\H,0.5777360323,3.0470013  
08,1.2486619057\H,2.3552050435,2.9420616231,1.2050307717\H,2.2928613729,-1.1222603741,-2.16129852  
79\H,2.5170843253,-2.6352460828,-1.254354798\H,3.8257756509,-1.4283914498,-1.310884018\H,2.4030170  
985,-1.0517381431,2.1550539067\H,3.8908138281,-1.3867824043,1.2380222182\H,2.5819176711,-2.5937178  
933,1.2877398351\O,-4.3237030675,-1.0002761005,0.1657123395\O,-3.8466709756,1.1873844248,0.1179910  
838\H,-4.8148113345,1.2226467063,0.1421276792\O,3.7113456954,0.9731896437,-0.0714612776\|Version=E  
S64L-G09RevD.01\State=2-A\HF=-785.1293564\S2=0.755263\S2-1=0.\S2A=0.750018\RMSD=7.282e-09\RM  
SF=2.288e-06\Dipole=-0.3922242,0.0574865,0.0091571\Quadrupole=-9.0226728,7.0520086,1.9706641,-11.17  
75593,0.4630448,0.2030565\PG=C01 [X(C13H16N1O3)]\@

#### Nitroxide 4b.2

1\1\GINC-R44\FOpt\UM062X\6-31+G(d,p)\C13H16N1O3(2)\ROOT\06-Dec-2017\0\#M062X\6-31+G(d,p) S  
CF=XQC INT(grid=ultrafine) OPT IOP(2/17=4) maxdisk=12GB\Nitroxide9.b.freq\0,2\C,0.0613450343,0.440  
4342612,0.0004132457\C,0.4258444574,-0.9085893181,0.0003164349\C,1.9249009541,-1.0795433241,0.0003  
147667\N,2.3537253724,0.3380082969,0.0004275854\C,1.26866838,1.3466921657,0.0004894562\C,-1.27560  
47597,0.8089172333,0.000429205\C,-2.2492659561,-0.1943839003,0.0003491444\C,-1.8873505335,-1.54611  
26005,0.0002503091\C,-0.5420912831,-1.9077669071,0.0002352096\C,1.3714330715,2.2076557912,-1.26107  
36743\C,1.3714101996,2.2074760436,1.2621768151\C,2.4477543009,-1.7711482181,-1.2617791401\C,2.4477  
354253,-1.7713431856,1.2623094624\H,-1.5905777521,1.8489965572,0.0005046193\C,-3.6753439535,0.2306  
739299,0.0003756133\H,-2.6621632854,-2.3045126132,0.0001885144\H,-0.2582892194,-2.9566519065,0.000  
1603351\H,1.2860257432,1.5888901982,-2.1584839797\H,2.3383306331,2.7176491026,-1.272109466\H,0.57  
28813259,2.955314566,-1.272474972\H,1.2859889215,1.5885824452,2.1594975196\H,0.5728571733,2.95513  
20155,1.2736711648\H,2.338306637,2.7174695465,1.2733020594\H,2.0575450957,-1.2830347736,-2.158939  
5853\H,2.1419070731,-2.821529316,-1.2711065497\H,3.5395549631,-1.7173971445,-1.2748026615\H,2.0575  
100922,-1.283370096,2.1595392483\H,3.5395357528,-1.717591504,1.2753590742\H,2.1418908965,-2.821726  
5348,1.2714683342\O,-4.0495694718,1.3803448143,0.0003527325\O,-4.5381044251,-0.8051037498,0.000162  
4184\H,-5.4317303881,-0.4297748414,0.0000997823\O,3.5755195249,0.6665829663,0.0004569785\|Version=  
ES64L-G09RevD.01\State=2-A\HF=-785.1294491\S2=0.755268\S2-1=0.\S2A=0.750018\RMSD=3.811e-09\RM  
SF=8.507e-05\Dipole=-0.6724516,-0.951452,-0.0000531\Quadrupole=-5.447639,4.5243451,0.9232939,1.779  
3883,0.0001197,0.0004076\PG=C01 [X(C13H16N1O3)]\@

#### Cation 4c.1

I\1\GINC-R51\FOpt\RM062X\6-31+G(d,p)\C14H16N1O5(1+)\ROOT\05-Dec-2017\0\#M062X/6-31+G(d,p)  
SCF=Tight INT(grid=ultrafine) OPT IOP(2/17=4) maxdisk=12GB\Cat10.a.freq\1,1\C,-0.9366186754,-0.6973  
605543,0.0000691129\C,-0.9363694847,0.6958108298,0.0273947274\C,-2.3250363797,1.2784150475,0.02800  
17437\N,-3.1408531967,0.0001337266,-0.0127353687\C,-2.325354539,-1.2788361082,-0.033534346\C,0.2552  
567314,-1.4065012776,0.0137083224\C,1.4601917925,-0.702938161,0.0489726785\C,1.4609283419,0.699437  
6727,0.0349584409\C,0.2560711836,1.4039826764,0.041785657\C,-2.6737921251,-2.0149924833,-1.3342606  
125\C,-2.7138257108,-2.0835231436,1.213463346\C,-2.6829695712,2.083911423,-1.2275902849\C,-2.703760  
0472,2.0143974879,1.3203434986\H,0.2854448598,-2.4928567879,0.0041622337\C,2.6989192503,-1.5479345  
699,0.1720858657\C,2.7028902487,1.5434252227,-0.0589323333\H,0.2869180608,2.4903137702,0.05190724  
73\H,-2.4419907987,-1.4066593746,-2.2116838721\H,-3.7275131245,-2.3030378692,-1.3424707954\H,-2.060  
3269477,-2.9183596485,-1.3735310785\H,-2.505019427,-1.5261029281,2.1296277618\H,-2.1071304572,-2.99  
22059492,1.219183288\H,-3.768566182,-2.3654324449,1.1757954883\H,-2.4528658173,1.5265334282,-2.138  
6746365\H,-2.0755994484,2.9920983208,-1.2185930881\H,-3.7380892432,2.3666297021,-1.2149311989\H,-2.4  
933600046,1.4057111982,2.2028923355\H,-3.7571316284,2.3033436018,1.3036188605\H,-2.090635075,2.91  
72508344,1.3744008914\O,2.8121110834,-2.61998355,-0.3628910231\O,3.5927226872,-1.0160607082,1.0097  
305648\H,4.3617814146,-1.6076403403,1.0549842696\O,2.8041603777,2.6155444254,0.4782937751\O,3.615  
9293605,1.0106308618,-0.8749571209\H,4.3862829737,1.6016313918,-0.9021022869\O,-4.3187504824,0.000  
6142777,-0.0269220631\Version=ES64L-G09RevD.01\State=1-A\HF=-973.3705299\RMSD=5.602e-09\RMS  
F=1.382e-05\Dipole=-3.1602851,0.001228,-0.0370889\Quadrupole=20.313473,-7.0420372,-13.2714358,0.0550  
57,0.3939849,-5.5909587\PG=C01 [X(C14H16N1O5)]\@

#### Cation 4c.2

I\1\GINC-R51\FOpt\RM062X\6-31+G(d,p)\C14H16N1O5(1+)\ROOT\05-Dec-2017\0\#M062X/6-31+G(d,p)  
SCF=Tight INT(grid=ultrafine) OPT IOP(2/17=4) maxdisk=12GB\Cat10.b.freq\1,1\C,0.9286079798,0.692205  
7728,0.031273552\C,0.9300109702,-0.7004277776,0.0206085752\C,2.3187810246,-1.2819254068,-0.0025723  
487\N,3.1339417423,-0.0032185042,0.0071708649\C,2.3175144653,1.2751913374,0.0261933779\C,-0.265236  
2534,1.4009986024,0.0287166885\C,-1.4681943262,0.6925565872,0.023508741\C,-1.4654324051,-0.7101896  
839,0.046497296\C,-0.2614000529,-1.4122517745,0.0278490404\C,2.6783153726,2.0596245281,-1.24206313  
3\C,2.6950951444,2.0320591418,1.3065084016\C,2.6703713622,-2.0309135146,-1.2954640282\C,2.70353015  
33,-2.0746382017,1.253160507\H,-0.2875811983,2.4866979863,0.0146338235\C,-2.7591112439,1.439664078,-  
0.1498027195\C,-2.7141522383,-1.5514770055,0.1176946083\H,-0.2859536637,-2.4986909173,0.0172630606  
\H,2.4491562277,1.4874334197,-2.1441398626\H,3.7336141666,2.341903802,-1.2324666087\H,2.071640936,  
2.9682674331,-1.2494684913\H,2.4828557083,1.4380021965,2.1985413286\H,2.083156851,2.9364597021,1.3  
447546761\H,3.7487403033,2.3198954128,1.2870154138\H,2.4401185785,-1.4315014245,-2.1793856573\H,2.0  
572576573,-2.9347844005,-1.3273461692\H,3.7242150274,-2.3186515835,-1.2982163358\H,2.4922431175,-1.5  
082676956,2.1632516893\H,3.7582721482,-2.3572197165,1.2212167529\H,2.0965525664,-2.9830282237,1.2  
660160225\O,-3.7227831436,0.9803505999,-0.7016320629\O,-2.6837228824,2.6909306438,0.3260073992\H,-  
3.5310145705,3.1316617301,0.1499283368\O,-2.8719737973,-2.5296321015,-0.5641496557\O,-3.5395740186,-  
1.1456833637,1.0835095153\H,-4.3354968445,-1.7021078041,1.0631952726\O,4.311975136,-0.0023438743,0.0  
00421289\Version=ES64L-G09RevD.01\State=1-A\HF=-973.3700545\RMSD=4.348e-09\RMSF=1.345e-05\  
Dipole=3.6135932,0.7983807,0.6043751\Quadrupole=11.6591202,2.4850514,-14.1441716,-5.6167452,-6.3021  
581,-3.5144457\PG=C01 [X(C14H16N1O5)]\@

#### Cation 4c.3

I\1\GINC-R48\FOpt\RM062X\6-31+G(d,p)\C14H16N1O5(1+)\ROOT\05-Dec-2017\0\#M062X/6-31+G(d,p)  
SCF=Tight INT(grid=ultrafine) OPT IOP(2/17=4) maxdisk=12GB\Cat10.c.freq\1,1\C,0.9333247133,0.679886  
7472,0.0011496609\C,0.944453157,-0.7118094022,-0.0039607801\C,2.3378681222,-1.2833876559,-0.002414  
2058\N,3.1435665875,0.0016203517,0.0089136645\C,2.317404451,1.2736056007,0.0125266304\C,-0.265716  
4289,1.3820903252,-0.0109668111\C,-1.4615747267,0.6662890314,-0.0250583545\C,-1.450500749,-0.736392  
314,-0.0000351823\C,-0.2433028151,-1.433037314,-0.0029397553\C,2.6890505917,2.0569894014,-1.2531951  
862\C,2.6713919055,2.037312944,1.2956697691\C,2.7159290251,-2.0411335442,-1.282203378\C,2.71018967  
73,-2.060920416,1.2667188588\H,-0.2939272074,2.4679894639,-0.0197407355\C,-2.7537427917,1.41404487  
11,-0.2112067904\C,-2.7322683362,-1.5046494468,0.174131516\H,-0.254290959,-2.5192482975,0.005689597  
9\H,2.4768471613,1.4801315737,-2.1564607026\H,3.7417589584,2.3480130153,-1.2301805712\H,2.0751056  
501,2.960570698,-1.2718627524\H,2.4509993624,1.4445449798,2.1865784089\H,2.0522930587,2.937223287,  
1.3227038315\H,3.7230388783,2.3329763408,1.2896696875\H,2.4944367047,-1.451837189,-2.1751373028\H,2  
.1115076439,-2.9507803931,-1.3149916399\H,3.7720466489,-2.3200360649,-1.2664181262\H,2.4803938089,  
-1.4876299156,2.1679517319\H,3.7675864317,-2.3350629781,1.2535014594\H,2.1106285394,-2.9742062601,  
1.2797062799\O,-3.6299575377,1.0445626676,-0.9439056256\O,-2.7623048158,2.5671403157,0.4709019787\

H,-3.6044362799,3.0169921634,0.2915683452\O,-3.6211561085,-1.1491109042,0.898413701\O,-2.715970537  
5,-2.657834176,-0.5076930501\H,-3.552466087,-3.1210512573,-0.3361820801\O,4.3215443032,0.011003751  
2,0.0144579084\Version=ES64L-G09RevD.01\State=1-A\HF=-973.3685333\RMSD=5.893e-09\RMSF=5.813  
e-06\Dipole=3.9449996,0.0313965,0.0184399\Quadrupole=5.1193667,10.2357408,-15.3551075,-0.0416269,0.0  
916874,0.2749528\PG=C01 [X(C14H16N1O5)]\@

### Nitroxide 4c.1

1\1\GINC-R60\FOpt\UM062X\6-31+G(d,p)\C14H16N1O5(2)\ROOT\05-Dec-2017\0\#M062X\6-31+G(d,p) S  
CF=Tight INT(grid=ultrafine) OPT IOP(2/17=4) maxdisk=12GB\Nitroxide10.a.freq\0,2\C,-0.9503152559,-0.6  
980054271,-0.005224994\C,-0.950257677,0.6964633257,0.0316175131\C,-2.3508620255,1.2567747399,0.02  
94793741\N,-3.1347502301,0.0000640231,-0.0149140618\C,-2.3509392001,-1.2572471553,-0.0391214056\C,  
0.2456927528,-1.4038210634,0.0044581867\C,1.4524755134,-0.7039245895,0.0440303716\C,1.4530081267,0.7  
005380901,0.0445101549\C,0.2461426248,1.4013603117,0.0528717106\C,-2.6545721214,-2.0262344229,-1.3  
276397745\C,-2.6909875098,-2.0956528114,1.1958435583\C,-2.6584045061,2.095518074,-1.2137326194\C,-  
2.6869426026,2.0259098762,1.3098481623\H,0.2699733187,-2.4901898961,-0.0034326334\C,2.688699907,-1.5  
339985824,0.1820886191\C,2.6930255797,1.5296649446,-0.0615112215\H,0.2710435539,2.4877102167,0.06  
13948809\H,-2.397632506,-1.4267094708,-2.205055421\H,-3.7209535038,-2.2643411761,-1.3605663972\H,-2.0  
79615751,-2.9564200736,-1.3567765389\H,-2.4556847641,-1.5472826559,2.1120160864\H,-2.1211991962,-3.  
0294617864,1.1872472465\H,-3.7587077421,-2.3298211,1.1870787774\H,-2.4000703982,1.5470535295,-2.12  
3622786\H,-2.0883264335,3.028898693,-1.1904396352\H,-3.725820345,2.330513539,-1.2323963228\H,-2.45  
30964779,1.4261005004,2.1935052331\H,-3.7536296569,2.2648388455,1.3153602834\H,-2.112183331,2.955  
6339725,1.3538164535\O,2.8451224136,-2.6095043208,-0.3421344837\O,3.5788176995,-0.9983597173,1.035  
2618054\H,4.3431017439,-1.5942930417,1.0672671369\O,2.8366471202,2.6050628774,0.4665832975\O,3.60  
45214566,0.9933269671,-0.8913524714\H,4.3698309291,1.5886781585,-0.9035679177\O,-4.3991015052,0.00  
05466059,-0.0312201675\Version=ES64L-G09RevD.01\State=2-A\HF=-973.6383667\S2=0.755259\S2-1=0.\S  
2A=0.750018\RMSD=4.468e-09\RMSF=3.825e-06\Dipole=0.7125086,-0.000273,0.0092015\Quadrupole=-0.84  
63135,-0.0694905,0.915804,0.071808,-0.0242991,-5.5260578\PG=C01 [X(C14H16N1O5)]\@

### Nitroxide 4c.2

1\1\GINC-R60\FOpt\UM062X\6-31+G(d,p)\C14H16N1O5(2)\ROOT\05-Dec-2017\0\#M062X\6-31+G(d,p) S  
CF=Tight INT(grid=ultrafine) OPT IOP(2/17=4) maxdisk=12GB\Nitroxide10.b.freq\0,2\C,0.9411627142,0.69  
13969063,0.0330139972\C,0.9428383013,-0.702843736,0.0142629455\C,2.3439636689,-1.26099442,-0.00313  
13048\N,3.1268693858,-0.0034452644,0.0389447033\C,2.3415563977,1.253192925,0.0316865917\C,-0.25592  
09034,1.3958637356,0.0328229265\C,-1.4621833367,0.6913056757,0.0260266308\C,-1.4587298525,-0.71301  
55892,0.0366936236\C,-0.2528118865,-1.4114054788,0.0144936411\C,2.6638711214,2.0513033085,-1.23472  
01739\C,-2.6632742001,2.0634105963,1.2896918275\C,2.6634343937,-2.0227745451,-1.2925879993\C,2.6692  
434771,-2.1059036451,1.230928108\H,-0.2727395138,2.481503366,0.0187515593\C,-2.74630783,1.43354165  
88,-0.1353791671\C,-2.705535325,-1.5408907932,0.1276870647\H,-0.2712012572,-2.4979260268,0.00573624  
45\H,2.4177620647,1.4731293555,-2.1294610965\H,3.7309673428,2.2880813456,-1.2479415005\H,2.091460  
3648,2.9835089182,-1.2495040146\H,2.4178650565,1.4927853341,2.1893825513\H,2.089844227,2.99510497  
43,1.2961257774\H,3.7300940985,2.3017630321,1.300653295\H,2.4174004902,-1.4185927632,-2.169932057  
8\H,2.0883885694,-2.9523698293,-1.3343097346\H,3.7301060841,-2.2608340804,-1.3134482516\H,2.420796  
3076,-1.5632173998,2.1469875016\H,3.737477648,-2.3379794791,1.2347420383\H,2.1019899972,-3.0410304  
326,1.2093966387\O,-3.7409929997,0.9809778633,-0.6466280513\O,-2.6700268982,2.7041722932,0.3059186  
323\H,-3.5248513346,3.1212257548,0.1183416142\O,-2.921427844,-2.5077287938,-0.5595530645\O,-3.5046  
345237,-1.1541972253,1.134115669\H,-4.2997676316,-1.7084717675,1.1031172059\O,4.3911052258,-0.0016  
957739,0.0149256291\Version=ES64L-G09RevD.01\State=2-A\HF=-973.6383375\S2=0.755256\S2-1=0.\S2A  
=0.750018\RMSD=7.245e-09\RMSF=2.993e-06\Dipole=-0.2586299,0.7764099,0.5808705\Quadrupole=-9.384  
1802,9.236899,0.1472812,-5.6095968,-5.970388,-3.6093853\PG=C01 [X(C14H16N1O5)]\@

### Nitroxide 4c.3

1\1\GINC-R60\FOpt\UM062X\6-31+G(d,p)\C14H16N1O5(2)\ROOT\05-Dec-2017\0\#M062X\6-31+G(d,p) S  
CF=Tight INT(grid=ultrafine) OPT IOP(2/17=4) maxdisk=12GB\Nitroxide10.c.freq\0,2\C,0.9451466344,0.68  
08630002,0.0041377232\C,0.9562547601,-0.7125975775,-0.0077450811\C,2.3613906959,-1.2618709986,-0.0  
06893488\N,3.1354586535,0.001477722,0.0059135034\C,2.3413593831,1.2523797533,0.0138002957\C,-0.25  
74387798,1.3785003736,-0.0029410687\C,-1.4569848908,0.6669694855,-0.0181384538\C,-1.4458971476,-0.7  
368253638,-0.0026895212\C,-0.235135879,-1.4292305327,-0.009241833\C,2.6629751673,2.0698760468,-1.23  
99444156\C,2.6515141082,2.0480113751,1.2845367075\C,2.6934907638,-2.053236476,-1.2746633452\C,2.68  
66604387,-2.0734179926,1.2498535906\H,-0.2806753242,2.4644238517,-0.0130396282\C,-2.7388006079,1.4  
164127675,-0.2011086011\C,-2.7168895079,-1.5066002319,0.1712518795\H,-0.2412295132,-2.5153876331,0.

0007182511\H,2.4232250718,1.5026124107,-2.1433403426\H,3.7287411833,2.3129817394,-1.2461402081\H,2.08571825,2.9991734752,-1.2437447209\H,2.4069835927,1.4635527972,2.1755414687\H,2.0701599416,2.9745843263,1.3013472077\H,3.716336462,2.2945652151,1.3029092591\H,2.4463713707,-1.4732966538,-2.1679141837\H,2.1270589664,-2.9889443772,-1.2952063154\H,3.7621880064,-2.2829763234,-1.2850368687\H,2.4312025262,-1.5094470201,2.1509914349\H,3.7560862881,-2.2994564471,1.2640609027\H,2.1242204108,-3.0117573788,1.249986028\O,-3.6407035384,1.0639118331,-0.9175462875\O,-2.746407879,2.5843383581,0.4690296892\H,-3.5863760264,3.0235569108,0.2639729614\O,-3.6291040306,-1.1688376766,0.8817028467\O,-2.7013812697,-2.6741716858,-0.4993586291\H,-3.5356393338,-3.1267829532,-0.3001858547\O,4.3998710535,0.0115058809,0.010825097\Version=ES64L-G09RevD.01\State=2-A\HF=-973.6370577\S2=0.755257\S2-1=0.\S2A=0.750018\RMSD=7.839e-09\RMSF=8.447e-06\Dipole=0.0606046,0.0006262,0.000196\Quadrupole=-15.5881277,16.6724983,-1.0843706,-0.2576448,-0.0495127,0.0257815\PG=C01 [X(C14H16N1O5)]\@

#### Cation 4d.1

1\1\GINC-R51\FOpt\RM062X\6-31+G(d,p)\C12H16N1O2(1+)\ROOT\05-Dec-2017\0\#M062X\6-31+G(d,p) SCF=Tight INT(grid=ultrafine) OPT IOP(2/17=4) maxdisk=12GB\Cat11.a.freq\1,1\C,-0.0379694767,-0.8319286031,0.0452090151\C,0.3521505845,0.5067460748,0.0419281992\C,-0.8210261802,1.4501268032,-0.002069436\N,-1.9594987385,0.4488754436,-0.0239041045\C,-1.5326154555,-1.0070163482,0.0041017326\C,0.9233921422,-1.835898574,0.0836995879\C,2.2688327931,-1.4855133818,0.118628358\C,2.651651402,-0.1367686478,0.1150324439\C,1.686406018,0.8758191801,0.076278369\C,-2.0722977312,-1.6552741324,-1.2776403834\C,-2.1454884561,-1.6278222862,1.2663807852\C,-0.9265279202,2.2792285741,-1.2885088791\C,-0.9997175538,2.3069739418,1.2578325187\H,0.6416427407,-2.8850750791,0.0869765511\H,2.0114892136,1.9116732286,0.0743770263\H,-1.6745284036,-1.1646830627,-2.1690848205\H,-3.1646200094,-1.6377239807,-1.2924410626\H,-1.7375775341,-2.6954058392,-1.2831327203\H,-1.7992581453,-1.1179138823,2.1684271294\H,-1.812345132,-2.6674110812,1.3135039775\H,-3.2368436662,-1.6105894588,1.2180042401\H,-0.8489448536,1.6474756989,-2.176490367\H,-0.0894190556,2.9812006417,-1.2949954666\H,-1.8611188374,2.8446504208,-1.3079521828\H,-0.9736539909,1.6947375709,2.1623341439\H,-1.9335179886,2.8721139182,1.2112513553\H,-0.1639172356,3.0094410247,1.2971041026\H,3.028716306,-2.2608119439,0.1489200154\O,3.9374646114,0.2621914438,0.1478408332\H,4.546110161,-0.4867155893,0.1722192092\O,-3.0904896079,0.7775179254,-0.0599001707\Version=ES64L-G09RevD.01\State=1-A\HF=-671.5508847\RMSD=4.000e-09\RMSF=2.890e-06\Dipole=-0.8501478,-0.3841089,-0.0211883\Quadrupole=5.7197683,4.2974726,-10.0172409,-4.3725917,0.4923285,-0.2802314\PG=C01 [X(C12H16N1O2)]\@

#### Cation 4d.2

1\1\GINC-R48\FOpt\RM062X\6-31+G(d,p)\C12H16N1O2(1+)\ROOT\05-Dec-2017\0\#M062X\6-31+G(d,p) SCF=Tight INT(grid=ultrafine) OPT IOP(2/17=4) maxdisk=12GB\Cat11.b.freq\1,1\C,-0.0373624647,-0.8152625112,0.0412775685\C,0.3432276778,0.521676855,0.0364248727\C,-0.8357937531,1.4587215136,-0.0044471335\N,-1.9679441535,0.4492699124,-0.0226439907\C,-1.5304428551,-1.0025121137,0.0044986617\C,0.9315882047,-1.8179197079,0.0774743913\C,2.2704480003,-1.4624633263,0.1082548724\C,2.648678861,-0.1098524239,0.103166994\C,1.681170547,0.8985137572,0.0670080485\C,-2.0679005945,-1.6560672975,-1.2755996797\C,-2.1341431879,-1.6287112822,1.2685619035\C,-0.9529815208,2.2863753889,-1.2907385831\C,-1.0188647822,2.3144780648,1.2554653196\H,0.6527821838,-2.8678724901,0.0817858713\H,1.9745952591,1.9455264934,0.0631464793\H,-1.6773394752,-1.1620467379,-2.1683368819\H,-3.1603761606,-1.6491867067,-1.2870643963\H,-1.7229370569,-2.6928461151,-1.2817917862\H,-1.7904176004,-1.1153886743,2.169635601\H,-1.7904610988,-2.6648981804,1.3150329284\H,-3.2257304689,-1.6223164527,1.22300448\H,-0.8708553936,1.6551368618,-2.1786565996\H,-0.1247975737,2.998816043,-1.30027422\H,-1.8936834768,2.8417115571,-1.3083517718\H,-0.9832167402,1.7030544057,2.1601736049\H,-1.9588467187,2.8696241141,1.212151535\H,-0.1918063469,3.027354341,1.2921501224\H,3.0528392417,-2.2125410062,0.1368020003\O,3.9715676702,0.1396187481,0.1348442073\H,4.16458416,1.0850668867,0.1287529697\O,-3.1008523857,0.7713600835,-0.0554073888\Version=ES64L-G09RevD.01\State=1-A\HF=-671.5493637\RMSD=6.849e-09\RMSF=7.185e-06\Dipole=-1.1313971,0.665705,-0.0372608\Quadrupole=1.8180782,7.0046291,-8.8227072,5.9555777,0.2070398,-0.0203515\PG=C01 [X(C12H16N1O2)]\@

#### Nitroxide 4d.1

1\1\GINC-R68\FOpt\UM062X\6-31+G(d,p)\C12H16N1O2(2)\ROOT\05-Dec-2017\0\#M062X\6-31+G(d,p) SCF=Tight INT(grid=ultrafine) OPT IOP(2/17=4) maxdisk=12GB\Cat11.a.freq\0,2\C,-0.0490047214,-0.8281800507,0.0393083086\C,0.3399125438,0.5129148665,0.0349552103\C,-0.8527409218,1.4372298874,-0.0059459535\N,-1.9550855847,0.4475409213,-0.024330527\C,-1.5505513612,-0.9780029972,0.0019350739\C,0.9137982309,-1.8285554943,0.0751088806\C,2.2638571308,-1.4800954582,0.1064312794\C,2.64133876,-0.1341543627,0.1017449681\C,1.6785443056,0.876255188,0.0658274315\C,-2.0577365387,-1.6723204465,-1.2647801802\C,-2.1231915137,-1.6444956252,1.2556457757\C,-0.9093796153,2.2864858772,-1.2783635642\C,-0.

9751999633,2.3129751202,1.243710281\H,0.6283160621,-2.8773667129,0.0789834811\H,2.0000392346,1.9136396783,0.0629919548\H,-1.6399010307,-1.197587448,-2.1566703303\H,-3.1484037842,-1.606092731,-1.3043341424\H,-1.7648373839,-2.7267035816,-1.258744134\H,-1.7519254175,-1.1499734441,2.1573307021\H,-1.8309631614,-2.6985819999,1.2880629328\H,-3.2144006595,-1.578022451,1.2370658035\H,-0.8074116794,1.6565198355,-2.1661820251\H,-0.1007516508,3.0234047162,-1.2759550823\H,-1.86877874,2.8090043652,-1.3215451161\H,-0.9200171106,1.7018279447,2.1486572303\H,-1.935259586,2.8357540121,1.2258061789\H,-0.167122517,3.0500986839,1.2680016717\H,3.0269674201,-2.2539278793,0.1345758151\O,3.9473060661,0.2566228554,0.1314088979\H,4.5247315007,-0.5145945095,0.1549554179\O,-3.1698683136,0.7993512401,-0.0594862401\Version=ES64L-G09RevD.01\State=2-A\HF=-671.808714\S2=0.755269\S2-1=0.\S2A=0.750018\RMSD=3.703e-09\RMSF=2.652e-06\Dipole=1.2775419,-0.8625669,0.0428962\Quadrupole=-3.9646191,5.6718396,-1.7072205,-2.30241,-0.0336459,-0.1391035\PG=C01 [X(C12H16N1O2)]\@

#### Nitroxide 4d.2

1\1\GINC-R68\FOpt\UM062X\6-31+G(d,p)\C12H16N1O2(2)\ROOT\05-Dec-2017\0\#M062X/6-31+G(d,p) S CF=Tight INT(grid=ultrafine) OPT IOP(2/17=4) maxdisk=12GB\Nitroxide11.b.freq\0,2\C,-0.0491153653,-0.8162487643,0.041676429\C,0.3311277113,0.5234748298,0.0367342547\C,-0.8649020013,1.4433684793,-0.0063885274\N,-1.9621276757,0.4484162192,-0.024884432\C,-1.5496838382,-0.974943514,0.0025535125\C,0.9214189413,-1.8140574768,0.0795614488\C,2.26696339,-1.4634137392,0.1122681939\C,2.6386982235,-0.1150068067,0.1069795036\C,1.6721919797,0.8910641767,0.0691081144\C,-2.0509685466,-1.6729462251,-1.2644219298\C,-2.1197476475,-1.6442803384,1.2558460437\C,-0.9258207283,2.2911697561,-1.2797501256\C,-0.9945273102,2.3200093375,1.2420839494\H,0.6382990986,-2.8635499063,0.0838428455\H,1.9667362801,1.9391616813,0.0651593697\H,-1.6355290807,-1.1957400188,-2.156117252\H,-3.1420515455,-1.6146412447,-1.3050605048\H,-1.7504419067,-2.7251027869,-1.2577694999\H,-1.7532074588,-1.1467128934,2.1577936296\H,-1.8200351376,-2.6961518601,1.289483266\H,-3.2113843207,-1.5856696054,1.2356072452\H,-0.8173132608,1.6612406727,-2.1667680422\H,-0.1239662392,3.0357852622,-1.2770912233\H,-1.8892662906,2.8060101929,-1.3250813646\H,-0.934838809,1.7105628501,2.1478398336\H,-1.9587097647,2.8351184555,1.2231220038\H,-0.1932762764,3.0648913334,1.2660657255\H,3.0483263787,-2.2148795064,0.1421873578\O,3.9745600389,0.1557806981,0.1403483302\H,4.1215389461,1.1081909735,0.1333961218\O,-3.1781877844,0.7955197681,-0.0620242772\Version=ES64L-G09RevD.01\State=2-A\HF=-671.8085599\S2=0.755266\S2-1=0.\S2A=0.750018\RMSD=8.163e-09\RMSF=2.113e-06\Dipole=0.9998135,0.1792507,0.0251185\Quadrupole=-7.8669158,8.3805292,-0.5136134,7.720278,-0.2891405,0.1087725\PG=C01 [X(C12H16N1O2)]\@

#### Cation 4e.1

1\1\GINC-R99\FOpt\RM062X\6-31+G(d,p)\C13H18N1O2(1+)\ROOT\05-Dec-2017\0\#M062X/6-31+G(d,p) SCF=Tight INT(grid=ultrafine) OPT IOP(2/17=4) maxdisk=12GB\Cat12.a.freq\1,1\C,-0.5210567271,-0.8660876727,0.0397610184\C,0.0953172716,0.3769923782,0.0246534338\C,-0.8946875196,1.5120498613,-0.0198536761\N,-2.1911866563,0.7250177868,-0.02826061\C,-2.0229528239,-0.7814373937,0.0081656967\C,0.252799028,-2.0285487602,0.0806184864\C,1.6306738575,-1.9167489852,0.105432634\C,2.2534930007,-0.6524706774,0.0899828718\C,1.4815313609,0.5146297883,0.0490667823\C,-2.6752510193,-1.3357670525,-1.2655949571\C,-2.7256296265,-1.2798991597,1.27821007\C,-0.8650940228,2.3394129952,-1.3114269485\C,-0.9155097167,2.3952239105,1.234402526\H,-0.2098279073,-3.011397825,0.0930540711\H,1.9425344024,1.4959896207,0.0366422885\H,-2.2056570808,-0.9254347483,-2.1626763881\H,-3.7487024237,-1.1324752668,-1.2733932955\H,-2.522003961,-2.4176703206,-1.2659102765\H,-2.2915424465,-0.8301965368,2.1743026849\H,-2.5734691606,-2.360614953,1.3320634072\H,-3.7983697762,-1.0773829875,1.234596683\H,-0.9029886488,1.697628223,-2.1948167909\H,0.0794099169,2.8882106596,-1.3284923065\H,-1.6888128085,3.0569191662,-1.3299193043\H,-0.9888961836,1.7927178615,2.1428638773\H,-1.7386879535,3.1121415106,1.1888310531\H,0.0280604359,2.9450516262,1.2647775753\H,2.2676328107,-2.7936920819,0.1373055315\O,3.5945504042,-0.6725329729,0.1169744665\C,4.2978447631,0.5624686027,0.1036363081\H,5.3536933584,0.3019922475,0.1301516587\H,4.045478194,1.162118183,0.9846970636\H,4.0808475495,1.1225661641,-0.8121909817\O,-3.2476098912,1.2462668092,-0.0606346532\Version=ES64L-G09RevD.01\State=1-A\HF=-710.8331281\RMSD=4.042e-09\RMSF=9.239e-05\Dipole=-1.2237927,0.7787783,-0.0413584\Quadrupole=8.7065998,2.0051146,-10.7117143,6.0845653,0.2501538,-0.1589598\PG=C01 [X(C13H18N1O2)]\@

#### Cation 4e.2

1\1\GINC-R97\FOpt\RM062X\6-31+G(d,p)\C13H18N1O2(1+)\ROOT\05-Dec-2017\0\#M062X/6-31+G(d,p) SCF=Tight INT(grid=ultrafine) OPT IOP(2/17=4) maxdisk=12GB\Cat12.b.freq\1,1\C,-0.5367265156,-0.8804488424,0.0852173865\C,0.0870572302,0.3687622302,0.0691890172\C,-0.8982790032,1.504613183,-0.0166019539\N,-2.1966041228,0.7215014794,-0.0478118618\C,-2.0372879748,-0.7867161122,0.0130448882\C,0.2302996841,-2.0348396994,0.1617972947\C,1.6192389778,-1.935301041,0.2219516761\C,2.2385238634,-0.6754122646,0.2051411919\C,1.4620275048,0.4922825955,0.1278724717\C,-2.6596506537,-1.3528128465,-1.2700

527729\C,-2.7762870856,-1.2627323074,1.2705686631\C,-0.8301595999,2.3130769018,-1.3184555837\C,-0.9462823611,2.4046635272,1.2245812364\H,-0.2343802685,-3.0169497173,0.1757165129\H,1.9681569376,1.4528897115,0.1168556482\H,-2.1633815921,-0.9582661093,-2.1597656451\H,-3.7308504143,-1.1414226182,-1.3098441068\H,-2.5153178547,-2.435739679,-1.2517462284\H,-2.3622475741,-0.8046503599,2.1718314213\H,-2.6344145841,-2.3437699846,1.3421637448\H,-3.8459421779,-1.0525449373,1.1971265502\H,-0.8498449943,1.659504007,-2.1937062332\H,0.1191413622,2.8537546812,-1.3179587703\H,-1.6480553084,3.035650277,-1.368329729\H,-1.0477164147,1.8155485718,2.1390569138\H,-1.7629448142,3.1262683843,1.147798573\H,0.00087523,2.9470422794,1.271698746\H,2.2117039828,-2.8395118892,0.2817582352\O,3.5651199741,-0.4817822258,0.2589942686\C,4.4201258194,-1.6162494588,0.3393378482\H,5.4324702421,-1.219512501,0.3713612743\H,4.3027400445,-2.2541586271,-0.5425223509\H,4.2202772181,-2.1892565953,1.2504260276\O,-3.2499447571,1.2455999868,-0.1142343537\Version=ES64L-G09RevD.01\State=1-A\HF=-710.8341661\RMSD=7.728e-09\RMSF=2.926e-05\Dipole=-1.1570824,-0.0168582,-0.0524602\Quadrupole=8.6183382,3.2548562,-11.8731945,-5.0552086,1.1285575,-0.7774499\PG=C01 [X(C13H18N1O2)]\@\

#### Nitroxide 4e.1

1\1\GINC-R68\FOpt\UM062X\6-31+G(d,p)\C13H18N1O2(2)\ROOT\05-Dec-2017\0\#M062X\6-31+G(d,p) S CF=Tight INT(grid=ultrafine) OPT IOP(2/17=4) maxdisk=12GB\Nitroxide12.a.freq\0,2\C,-0.5318262109,-0.8655371315,0.0395382002\C,0.0858501991,0.3792314821,0.0244450016\C,-0.9230098417,1.5020018342,-0.0201778673\N,-2.1834299111,0.7240679635,-0.0281013617\C,-2.0361465967,-0.7500675206,0.0072022181\C,0.2433006965,-2.0242756342,0.080332754\C,1.6265957439,-1.9191273871,0.1054195486\C,2.2436627139,-0.6586829674,0.0899680549\C,1.4742080022,0.5067136611,0.0491452988\C,-2.6618248914,-1.3531144037,-1.2532431842\C,-2.711754351,-1.2977485233,1.2671463695\C,-0.8345701337,2.3394615195,-1.2987406533\C,-0.884549877,2.3947558277,1.2229642333\H,-0.223871112,-3.005734847,0.0926262604\H,1.9328348299,1.489690372,0.0366589073\H,-2.1715628102,-0.9633321924,-2.1494798958\H,-3.724722416,-1.0991088378,-1.289854945\H,-2.5561117591,-2.4422277238,-1.2414110097\H,-2.2570170473,-0.8685770372,2.1641153435\H,-2.6066030361,-2.386239149,1.3073264638\H,-3.7750465275,-1.0433043017,1.2504687203\H,-0.8473344408,1.6949757094,-2.181900883\H,0.090064577,2.9246761943,-1.3041026393\H,-1.6877949806,3.0216738986,-1.3439464278\H,-0.9328474463,1.7895738455,2.1323150654\H,-1.7382991189,3.0775572252,1.2044043737\H,0.0396590394,2.9804395229,1.239299242\H,2.2617062323,-2.7978132513,0.1372875207\O,3.6034186645,-0.6739103295,0.1172502645\C,4.2766209129,0.5673574514,0.1030717512\H,5.3402600252,0.3339111145,0.1291198766\H,4.013818774,1.1705628341,0.9803287226\H,4.0489723179,1.1310445547,-0.809580056\O,-3.3167202204,1.2861462269,-0.0628752679\Version=ES64L-G09RevD.01\State=2-A\HF=-711.0900848\S2=0.755269\S2-1=0.\S2A=0.750018\RMSD=4.589e-09\RMSF=5.278e-05\Dipole=1.2702272,-0.0461538,0.0260724\Quadrupole=-3.1076954,4.0414566,-0.9337613,9.6218334,-0.25565,0.0815432\PG=C01 [X(C13H18N1O2)]\@\

#### Nitroxide 4e.2

1\1\GINC-R80\FOpt\UM062X\6-31+G(d,p)\C13H18N1O2(2)\ROOT\05-Dec-2017\0\#M062X\6-31+G(d,p) S CF=Tight INT(grid=ultrafine) OPT IOP(2/17=4) maxdisk=12GB\Nitroxide12.b.freq\0,2\C,-0.5449080962,-0.8744275585,0.0847824196\C,0.0768574175,0.3782881875,0.0684034484\C,-0.9319670257,1.4978785413,-0.018028042\N,-2.1918700546,0.7185840446,-0.0474975554\C,-2.0477209637,-0.7555160895,0.0116632769\C,0.2248261387,-2.0243818361,0.1613047011\C,1.6186841613,-1.9276743562,0.2216780897\C,2.229659214,-0.6692228272,0.2044596861\C,1.4545152271,0.4953334884,0.1273426383\C,-2.6424005629,-1.3739816513,-1.2562971331\C,-2.7577461414,-1.2841809124,1.2607655148\C,-0.8097106581,2.3167973944,-1.305600072\C,-0.9248515237,2.4076740547,1.2130522883\H,-0.2421583024,-3.0060633543,0.1751640004\H,1.957971001,1.4578261153,0.1159675258\H,-2.1269552109,-0.9991584416,-2.1447025009\H,-3.7027189465,-1.1159241868,-1.3246499121\H,-2.5417513165,-2.4632275615,-1.2258821055\H,-2.3243773758,-0.8454285202,2.1636097328\H,-2.658285447,-2.3724971694,1.3172232486\H,-3.8190328628,-1.0253825928,1.2134614301\H,-0.8021124157,1.6599871684,-2.1796849248\H,0.1170089833,2.898218668,-1.2953834104\H,-1.6596733524,3.0002568879,-1.3817757523\H,-0.9990586642,1.8154595125,2.1291618359\H,-1.7759941268,3.0920094853,1.1621145401\H,0.0008237888,2.9899406716,1.2455017606\H,2.2110096434,-2.8324340284,0.2814558617\O,3.5748690617,-0.4744239244,0.2593423193\C,4.4053364292,-1.6143114495,0.3382866152\H,5.427695758,-1.2398659011,0.3712970121\H,4.2803083988,-2.2573334407,-0.5409510795\H,4.1988900091,-2.192816493,1.2465220827\O,-3.3237221845,1.2790780751,-0.1196475403\Version=ES64L-G09RevD.01\State=2-A\HF=-711.0900613\S2=0.755271\S2-1=0.\S2A=0.750018\RMSD=6.901e-09\RMSF=3.561e-05\Dipole=1.3412002,-1.0225203,0.0979712\Quadrupole=-2.9289411,4.7481503,-1.8192091,0.6947519,-0.0745896,-0.2047107\PG=C01 [X(C13H18N1O2)]\@\

#### Cation 4f.1

1\1\GINC-R53\FOpt\RM062X\6-31+G(d,p)\C14H20N1O3(1+)\ROOT\05-Dec-2017\0\#M062X\6-31+G(d,p) SCF=Tight INT(grid=ultrafine) OPT IOP(2/17=4) maxdisk=12GB\Cat13.b.freq\1,1\C,0.3248039933,0.693021

0801,0.0896996339\C,0.3353773383,-0.6872733844,0.0917600122\C,1.724496526,-1.2658841598,0.1280396548\N,2.5297934195,0.0198079816,0.1469693554\C,1.7048953176,1.2929502727,0.1242200591\C,-0.8792158745,1.4065538215,0.0579792861\C,-2.0747171115,0.7000099159,0.0283183523\C,-2.0637537125,-0.7312040374,0.0304547386\C,-0.8575695566,-1.4192588715,0.0621974027\C,2.1068736642,2.0649753412,-1.1388928482\C,2.0418286807,2.0682732191,1.4042254308\C,2.1382836121,-2.0354277796,-1.1327721387\C,2.0732386285,-2.0321299017,1.4103461403\H,-0.8809419924,2.4908092342,0.0565290912\H,-0.8426852028,-2.5034129872,0.0639840127\H,1.9153400758,1.4778048684,-2.0401281406\H,3.1578319566,2.3609629567,-1.0969443158\H,1.4904663098,2.9660891405,-1.1821511247\H,1.8044352726,1.4834279077,2.2960099695\H,1.4240756402,2.9694552466,1.4135805677\H,3.0935768899,2.3642207846,1.4152899183\H,1.9377979592,-1.4539534248,-2.035751878\H,1.5357541831,-2.9460039975,-1.1733260888\H,3.193651993,-2.3151539743,-1.089964233\H,1.826893156,-1.4483303856,2.3003862321\H,3.1293969263,-2.3118961464,1.4222700011\H,1.4693635136,-2.9426378914,1.4224056036\O,-3.2938528311,1.2503172389,-0.0035769432\O,-3.274315211,-1.3002160774,0.0002302613\C,-3.3519875519,-2.7174693229,0.0000815195\H,-4.4132905196,-2.9547929782,-0.0267555215\H,-2.9054473951,-3.1314590709,0.9108538144\H,-2.8594998305,-3.1337886811,-0.8855966571\C,-3.3932276455,2.6662075092,-0.0079547445\H,-4.4580411316,2.8871635256,-0.0354758638\H,-2.9071552632,3.087376857,-0.8948830482\H,-2.9531028278,3.0897064672,0.9015674234\O,3.7077309336,0.0288761847,0.1770855403\Version=ES64L-G09RevD.01\State=1-A\HF=-825.3134905\RMSD=3.795e-09\RMSF=3.678e-05\Dipole=2.0038718,0.0154266,0.0512327\Quadrupole=3.5005155,10.1329813,-13.6334968,-0.0501547,0.4385873,-0.0321174\PG=C02V [C2(N1O1),SGV(C10H4O2),X(C4H16)]\@

#### Cation 4f.2

1\1\GINC-R102\FOpt\RM062X\6-31+G(d,p)\C14H20N1O3(1+)\ROOT\05-Dec-2017\0\#M062X\6-31+G(d,p) SCF=Tight INT(grid=ultrafine) OPT IOP(2/17=4) maxdisk=12GB\Cat13.c.freq\1,1\N,2.79793478,0.1212489337,0.0614462011\C,2.15365209,2.0285760454,1.4622247479\C,1.8788924798,1.327427585,0.1259634675\C,2.241672711,2.216949718,-1.0751567164\C,0.5452071781,0.6332997689,0.0372863216\C,2.0917371327,-1.2155314434,-0.0618910626\C,2.4963919326,-2.0523341419,1.158247477\C,2.5598008466,-1.8508015673,-1.377709903\C,0.6629314368,-0.743607164,-0.0623675007\C,-0.4748504944,-1.5445572417,-0.1519975327\C,-1.7285587076,-0.9503535927,-0.1479139695\C,-1.8477247924,0.4657610878,-0.0660496864\C,-0.7026048045,1.256838951,0.0383590797\O,-3.1010107083,0.9448155,-0.1179893534\C,-3.2918332092,2.3526658759,-0.0961718057\O,-2.8157038542,-1.736542225,-0.3112243469\C,-3.752858657,-1.7791892763,0.7736770416\H,-0.7810585826,2.3366505498,0.1009346987\H,-0.4254852376,-2.6262698304,-0.2362087835\H,2.0760610835,1.6855467217,-2.0181682348\H,3.25134337,2.5827053531,-1.005100408\H,1.5452700594,3.0727794635,-1.0557047566\H,1.9577546818,1.3637121373,2.3067436423\H,1.4715637801,2.8792065818,1.5323967657\H,3.1809748757,2.3982725171,1.5033324332\H,2.3192792655,-1.215149345,-2.2330887456\H,2.021191355,-2.7944351689,-1.4934562994\H,3.6321473555,-2.0582554105,-1.3501789496\H,2.2096367878,-1.559557875,2.0902348506\H,3.569960063,-2.255140069,1.1528772992\H,1.9589811111,-3.0015932802,1.0950396745\H,-4.5039547005,-2.5112148714,0.4823539267\H,-4.2191103684,-0.8053825674,0.9281035923\H,-3.2482250061,-2.1117995287,1.6866984571\H,-4.3662650355,2.5068151487,-0.1697202385\H,-2.7948443053,2.823578924,-0.9508873744\H,-2.9222293127,2.7814432091,0.8414837518\O,3.9715388401,0.2177705274,0.1033822392\Version=ES64L-G09RevD.01\State=1-A\HF=-825.3100853\RMSD=3.832e-09\RMSF=4.615e-06\Dipole=1.932701,0.8050845,0.4852963\Quadrupole=9.3735976,3.8410466,-13.2146442,-4.8804482,-3.8703936,-1.3484987\PG=C01 [X(C14H20N1O3)]\@

#### Nitroxide 4f.1

1\1\GINC-R44\FOpt\UM062X\6-31+G(d,p)\C14H20N1O3(2)\ROOT\08-Dec-2017\0\#M062X\6-31+G(d,p) SCF=Tight INT(grid=ultrafine) OPT IOP(2/17=4) maxdisk=12GB\Cat13.b.freq\0,2\C,0.,0.69117,-0.36753\C,0.,-0.69117,-0.36753\C,0.,-1.25624,-1.76704\N,0.,0.,-2.55321\C,0.,1.25624,-1.76704\C,0.,1.40659,0.83432\C,0.,0.71031,2.03662\C,0.,-0.71031,2.03662\C,0.,-1.40659,0.83432\C,-1.26066,2.0604,-2.09549\C,1.26066,2.0604,-2.09549\C,-1.26066,-2.0604,-2.09549\C,1.26066,-2.0604,-2.09549\H,0.,2.49129,0.82376\H,0.,-2.49129,0.82376\H,-2.15747,1.48506,-1.85024\H,-1.27205,2.30003,-3.16229\H,-1.27377,2.99218,-1.52161\H,2.15747,1.48506,-1.85024\H,1.27377,2.99218,-1.52161\H,1.27205,2.30003,-3.16229\H,-2.15747,-1.48506,-1.85024\H,-1.27377,-2.99218,-1.52161\H,-1.27205,-2.30003,-3.16229\H,2.15747,-1.48506,-1.85024\H,1.27205,-2.30003,-3.16229\H,1.27377,-2.99218,-1.52161\O,0.,1.28475,3.26443\O,0.,-1.28475,3.26443\C,0.,-2.69488,3.32108\H,0.,-2.95248,4.37941\H,0.89532,-3.11086,2.84321\H,-0.89532,-3.11086,2.84321\C,0.,2.69488,3.32108\H,0.,2.95248,4.37941\H,-0.89532,3.11086,2.84321\H,0.89532,3.11086,2.84321\O,0.,0.,-3.81864\Version=ES64L-G09RevD.01\State=2-B1\HF=-825.5674936\S2=0.755266\S2-1=0.\S2A=0.750018\RMSD=2.649e-09\RMSF=8.160e-06\Dipole=0.,0.,1.1944592\Quadrupole=-1.1923196,14.1730917,-12.9807721,0.,0.,0.\PG=C02V [C2(N1O1),SGV(C10H4O2),X(C4H16)]\@

#### Nitroxide 4f.2

I\1\GINC-R155\FOpt\UM062X\6-31+G(d,p)\C14H20N1O3(2)\ROOT\05-Dec-2017\0\#M062X\6-31+G(d,p)  
SCF=Tight INT(grid=ultrafine) OPT IOP(2/17=4) maxdisk=12GB\Nitroxide13.c.freq\0,2\N,2.776853284,0.11  
662249,0.0884338296\C,2.0996674973,2.0502727863,1.4460577025\C,1.8933688055,1.3055864987,0.124696  
1508\C,2.2102897235,2.2115281717,-1.0683742511\C,0.543428064,0.6375131843,0.0210734038\C,2.097567  
1386,-1.1926124436,-0.0577819937\C,2.4379785892,-2.0777677896,1.1435658064\C,2.5403040474,-1.85373  
42846,-1.3658418913\C,0.6575195216,-0.7421312073,-0.078399695\C,-0.4858587018,-1.532828168,-0.18151  
31576\C,-1.7355896194,-0.9300458525,-0.1889558833\C,-1.8508881198,0.476528061,-0.0991878654\C,-0.70  
38757929,1.2621358478,0.0125427696\O,-3.1182654447,0.965181157,-0.13912743\C,-3.2796524477,2.36854  
61001,-0.104366065\O,-2.8520226568,-1.7045206026,-0.3440179124\C,-3.6619507837,-1.8122425593,0.8225  
610018\H,-0.7728954352,2.3426142535,0.0821968302\H,-0.4382534061,-2.6151957603,-0.2664043074\H,2.0  
501802041,1.6780728486,-2.0092253058\H,3.2545433308,2.5308847251,-1.0138104425\H,1.5660700179,3.0  
960342876,-1.0524013086\H,1.8595237291,1.4022898607,2.2933532011\H,1.456086225,2.9345116812,1.485  
8881008\H,3.1433097297,2.3666913415,1.5248924835\H,2.289179979,-1.2202578846,-2.2208649695\H,2.04  
00641838,-2.8193518984,-1.4867087766\H,3.6219621647,-2.012142291,-1.345703504\H,2.111167449,-1.604  
8007958,2.0736447746\H,3.5192552224,-2.2347428351,1.1851147281\H,1.9406963194,-0.832777462,1.129600024\H,-3.089  
034817\H,-4.496463774,-2.4614085916,0.5565684692\H,-4.0389940436,-0.832777462,1.129600024\H,-3.089  
5685477,-2.2662794735,1.6402873925\H,-4.351758901,2.549334905,-0.1699047971\H,-2.7762285285,2.8438  
141911,-0.9543046811\H,-2.8938652516,2.7889843184,0.8320024598\O,4.0372162287,0.2179300343,0.1353  
116275\Version=ES64L-G09RevD.01\State=2-A\HF=-825.565874\S2=0.755263\S2-1=0.\S2A=0.750018\RM  
SD=6.441e-09\RMSF=3.053e-06\Dipole=-1.3112033,0.6067652,0.4449407\Quadrupole=-8.5594749,9.208490  
2,-0.6490152,-5.4333545,-4.3608654,-1.6957219\PG=C01 [X(C14H20N1O3)]\@

### Cation 9.1

I\1\GINC-R39\FOpt\RM062X\6-31+G(d,p)\C10H20N1O2(1+)\ROOT\14-Dec-2017\0\#M062X\6-31+G(d,p)  
SCF=Tight INT(grid=ultrafine) OPT IOP(2/17=4) maxdisk=12GB\Cat.OMe.freq\1,1\C,-0.0574586512,0.0268  
663389,-0.0550359827\C,-0.082308963,0.0335885963,1.4782589401\C,2.396403641,0.0063032824,1.6908026  
542\C,2.6376552834,-0.0059745536,0.1780800114\N,1.3462806078,0.4176010184,-0.5252135341\O,1.439652  
5252,1.0490591805,-1.5215984345\C,-1.0312177506,1.0462950998,-0.6387699129\C,-0.3284297523,-1.36930  
18331,-0.6539993955\H,-1.0284565839,-0.4346546651,1.7680952059\H,3.2532498528,-0.4861645853,2.1606  
139125\C,2.9734749225,-1.4101132005,-0.3669214398\C,3.7229881912,0.9870919621,-0.2260220809\H,-0.7  
576446085,2.0670329589,-0.3595537674\H,-2.0154540499,0.830048714,-0.2171911573\H,-1.0981064591,0.9  
767507318,-1.7253568806\H,0.2284283338,-2.1661505149,-0.1629635699\H,-0.1254053896,-1.3847318463,-  
1.7280717238\H,-1.3941291128,-1.563488354,-0.5086189609\H,2.3202529422,-2.1914490838,0.0189649668\  
H,3.9919695612,-1.6301013375,-0.0371789851\H,2.9608052236,-1.4236206703,-1.4599601097\H,3.43015496  
96,2.0152165789,0.0017538018\H,3.9773616892,0.9114779557,-1.2840503423\H,4.6120966994,0.748393194,  
0.3620050372\C,1.1070709481,-0.6677528919,2.1404778722\O,1.0727962144,-0.5237698487,3.5328856596\  
H,1.1156898949,-1.7398110539,1.8808132037\C,0.1190380435,-1.3377847825,4.1972504499\H,-0.10771157  
66,1.0674666297,1.8441367801\H,2.3816255928,1.0400602011,2.0566285268\H,0.2993075321,-1.217006967  
3,5.2643918507\H,-0.9083525597,-1.0261955312,3.975510955\H,0.2504746484,-2.3925621143,3.9246427956  
\Version=ES64L-G09RevD.01\State=1-A\HF=-597.7419578\RMSD=4.557e-09\RMSF=6.591e-06\Dipole=-0.  
1681001,-0.3373976,-0.9801375\Quadrupole=5.3285099,-3.5629452,-1.7655647,0.7458209,-2.4859638,-2.406  
2662\PG=C01 [X(C10H20N1O2)]\@

### Cation 9.2

I\1\GINC-R39\FOpt\RM062X\6-31+G(d,p)\C10H20N1O2(1+)\ROOT\14-Dec-2017\0\#M062X\6-31+G(d,p)  
SCF=Tight INT(grid=ultrafine) OPT IOP(2/17=4) maxdisk=12GB\Cat.OMe.2.freq\1,1\C,-0.0016055951,0.01  
82183765,0.0251584787\C,0.0517860348,-0.0196477063,1.5613307556\C,1.4445731535,-0.0462584991,2.177  
2651616\C,2.2345229411,-1.2340051745,1.6205679311\C,2.3656772697,-1.282139452,0.0902616322\N,1.001  
4565527,-0.988515335,-0.5304082481\O,0.7251096269,-1.5434614141,-1.5395439874\C,0.4002201642,1.384  
5056718,-0.5736348985\C,-1.3821658281,-0.3884695602,-0.4847304126\H,-0.4992044065,-0.9006572929,1.9  
099654774\H,-0.4870793512,0.8636512689,1.9167336997\H,1.7535075531,-2.1572738011,1.9648290954\H,3.2  
531836789,-1.2504686,2.0210054965\C,2.7908704559,-2.6697410292,-0.3834236545\C,3.324309767,-0.2128  
932198,-0.4770928102\H,1.3087235361,1.7858560869,-0.1320518552\H,-0.4194604573,2.0686153314,-0.338  
4891389\H,0.4855113583,1.3165555054,-1.661495315\H,-1.6200584626,-1.4235780687,-0.2251898577\H,-1.  
4761214814,-0.2584126856,-1.5634725966\H,-2.1099374938,0.2624141848,0.0054226416\H,2.0394862697,-3.4  
264038472,-0.142236754\H,3.7123157767,-2.9230375429,0.1459676479\H,2.9924148943,-2.693962246,-1.45  
50185062\H,3.1303071623,0.7788247354,-0.0749535281\H,3.2856691069,-0.2016076217,-1.5696479471\H,4.  
3310438589,-0.5176730328,-0.177894497\H,1.3294075134,-0.1999935492,3.2608364391\O,2.0589537814,1.2  
01052073,1.9456313931\C,3.1830527844,1.4681293755,2.7718665308\H,3.4556768698,2.5095437505,2.6046  
229806\H,2.9291177619,1.3254966083,3.82867638\H,4.0379394019,0.830380071,2.5140185724\Version=ES



64L-G09RevD.01\State=1-A\HF=-597.7473253\RMSD=5.847e-09\RMSF=5.708e-06\Dipole=0.0166312,-0.424682,0.0723115\Quadrupole=3.8779222,-2.7600291,-1.1178931,-1.6921109,2.378564,0.9404906\PG=C01 [X(C10H20N1O2)]\@

### Nitroxide 9.1

1\1\GINC-R94\FOpt\UM062X\6-31+G(d,p)\C10H20N1O2(2)\ROOT\14-Dec-2017\0\#M062X\6-31+G(d,p) SCF=Tight INT(grid=ultrafine) OPT IOP(2/17=4) maxdisk=12GB\Nitroxide.OMe.freq\0,2\C,-0.0155744612,0.0242216678,-0.0480825638\C,-0.0630180177,0.0385953339,1.4850366522\C,2.4030750386,0.0179789765,1.6829646636\C,2.6073533306,-0.0019842794,0.1647486223\N,1.3466553589,0.404370254,-0.5207717599\O,1.449044768,0.6561681745,-1.7660516292\C,-0.9911797184,1.0676347905,-0.5964950021\C,-0.3836976485,-1.356853666,-0.615204681\H,-1.011938907,-0.4176969035,1.7888910608\H,3.2653143354,-0.4575013627,2.1625861424\C,3.0343232096,-1.3910400325,-0.3368972064\C,3.6795479768,1.0205403103,-0.216937922\H,-0.6843582624,2.0722705278,-0.2921747229\H,-1.9914700018,0.8687673645,-0.1998759858\H,-1.022560801,1.0305032821,-1.6863135501\H,0.1907860163,-2.16536653,-0.1565263767\H,-0.2009555801,-1.3650005705,-1.6930671002\H,-1.4455870561,-1.5537655903,-0.4373401552\H,2.3743440629,-2.1864284509,0.018004685\H,4.0467537369,-1.6108175641,0.0157295024\H,3.0338396633,-1.3968875584,-1.4301934386\H,3.3472799804,2.031768866,0.0341600784\H,3.8880413206,0.9799454677,-1.2869459002\H,4.5969695186,0.8030282919,0.3382766753\C,1.1244778263,-0.6647469605,2.1349689164\O,1.0940722776,-0.572494218,3.5470047476\H,1.1371889193,-1.7317750144,1.8541164956\C,0.0922489893,-1.3505739085,4.1603338509\H,-0.0666585693,1.075891122,1.8448291751\H,2.3647790717,1.0564414793,2.0358141883\H,0.2814191427,-1.3233108579,5.2343583956\H,-0.9138512363,-0.9555161074,3.9707772835\H,0.1354375761,-2.3937477255,3.8150832047\Version=ES64L-G09RevD.01\State=2-A\HF=-598.0016151\S2=0.754868\S2-1=0.\S2A=0.750014\RMSD=2.869e-09\RMSF=5.514e-06\Dipole=-0.4250156,-0.7253309,0.8202104\Quadrupole=4.8009826,1.3602702,-6.1612528,0.3775949,-1.5934185,0.6663714\PG=C01 [X(C10H20N1O2)]\@

### Nitroxide 9.2

1\1\GINC-R52\FOpt\UM062X\6-31+G(d,p)\C10H20N1O2(2)\ROOT\14-Dec-2017\0\#M062X\6-31+G(d,p) SCF=Tight INT(grid=ultrafine) OPT IOP(2/17=4) maxdisk=12GB\Nitroxide.OMe.2.freq\0,2\C,0.0221622085,0.050862789,0.0114204417\C,0.0365694216,-0.0034114669,1.5477754151\C,1.4151225125,-0.0310679337,2.1911370651\C,2.2132552878,-1.2080238473,1.6304914133\C,2.3340732083,-1.2464644353,0.1016473364\N,1.0010275289,-0.9906336914,-0.5122490021\O,0.9016941221,-1.2651345569,-1.7533272698\C,0.337436241,1.3919829055,-0.5719069274\C,-1.363611578,-0.4346281124,-0.4697673217\H,-0.5027445117,-0.89324843,1.8958694506\H,-0.513662495,0.8739662628,1.9043868227\H,1.7041771083,-2.121643777,1.9635814228\H,3.2214153969,-1.2435223473,2.0591261898\C,2.7659937049,-2.6518041136,-0.3259510401\C,3.3511798353,-0.2253403589,-0.4336735661\H,1.252839965,1.8116734299,-0.1556681627\H,-0.4847277739,2.0760305321,-0.3374043953\H,0.4250180504,1.3096885506,-1.658835054\H,-1.5636980928,-1.4681093847,-0.1717395222\H,-1.4328501547,-0.3688810988,-1.5563358485\H,-2.1214283198,0.215467092,-0.0215497174\H,2.0014678936,-3.3863635019,-0.056482121\H,3.6998375517,-2.9110951858,0.1826594454\H,2.92138885,-2.6959940404,-1.4046175783\H,3.1398630741,0.7848265256,-0.0809474934\H,3.3279114877,-0.2383969037,-1.5268655414\H,4.3573072817,-0.5067304953,-0.1036930089\H,1.291257224,-0.187060691,3.2764881356\O,2.0258191735,1.2347869296,1.9984891321\C,3.227515054,1.413585716,2.7115268557\H,3.4751228759,2.474970892,2.6600381068\H,3.1079166929,1.123395208,3.7653438539\H,4.0545553733,0.8371374103,2.2759087899\Version=ES64L-G09RevD.01\State=2-A\HF=-598.001483\S2=0.754886\S2-1=0.\S2A=0.750014\RMSD=4.999e-09\RMSF=4.690e-06\Dipole=0.4463977,0.185133,1.4493891\Quadrupole=3.7293993,-0.84351,-2.8858893,-0.3081399,0.1061954,-2.5487591\PG=C01 [X(C10H20N1O2)]\@

### Model 1.1

1\1\GINC-R43\FOpt\RM062X\6-31+G(d,p)\C10H18O2\ROOT\01-Dec-2017\0\#M062X\6-31+G(d,p) SCF=Tight INT(grid=ultrafine) OPT IOP(2/17=4) maxdisk=12GB\1.a.freq\0,1\C,-3.2041622317,1.0120450997,0.2065908085\C,-2.8997680931,-0.4409482614,-0.1451752602\C,-1.3813277616,-0.6407650224,0.2173159085\C,-0.8185612775,0.8133038836,0.2341338597\C,-1.9392140275,1.7732967639,-0.2230279903\H,-3.3466998141,1.094724177,1.291478504\H,-4.1149193039,1.3867086253,-0.2735148503\H,-3.0206407558,-0.6125243505,-1.2209446403\C,-3.796686458,-1.429336054,0.5507500038\C,-0.6883617183,-1.5210709392,-0.8253194395\C,-1.214649727,-1.2734825032,1.6054629358\H,0.0745737424,0.9057577611,-0.3958943929\H,-0.5162756402,1.0735352028,1.2560550956\C,-1.9055618612,1.9608952935,-1.7462370868\C,-1.8384738726,3.1407930721,0.451337246\H,-0.7282934296,-1.0609233173,-1.8187489997\H,-1.1687180252,-2.5033647485,-0.8833006785\H,0.3653356875,-1.6677356088,-0.5640305972\H,-1.7665769859,-0.7144938636,2.3688030907\H,-0.1559465176,-1.2750185569,1.8848622439\H,-1.5661647867,-2.311153712,1.6175940844\H,-1.9304263676,1.0071499485,-2.2829216686\H,-0.9894203661,2.481823825,-2.0451492059\H,-2.7601425609,2.5587505811,-2.08224718

12\H,-1.8809179744,3.0435214414,1.5413010562\H,-2.6604020507,3.7932241367,0.1359977338\H,-0.897194  
2524,3.637380451,0.190280024\O,-4.4875665455,-1.2109899062,1.5167089795\O,-3.7318313123,-2.6557885  
06,-0.0166182336\H,-4.3092057125,-3.2398949125,0.4992686506\Version=ES64L-G09RevD.01\State=1-A\H  
F=-542.1748067\RMSD=9.663e-09\RMSF=1.281e-05\Dipole=0.4783798,-0.0635431,-0.4413134\Quadrupole=  
-1.4885027,3.7365338,-2.2480311,1.3243377,2.9897392,-0.7813832\PG=C01 [X(C10H18O2)]\@

### Model 1.2

1\1\GINC-R43\FOpt\RM062X\6-31+G(d,p)\C10H18O2\ROOT\01-Dec-2017\0\#M062X/6-31+G(d,p) SCF=Tight  
INT(grid=ultrafine) OPT IOP(2/17=4) maxdisk=12GB\1.b.freq\0,1\C,-3.192378585,1.0194273703,0.2400  
808493\C,-2.8982038534,-0.4283818705,-0.1467827319\C,-1.3852429035,-0.6397543993,0.2208250084\C,-0.  
8002577779,0.8051963774,0.18662768\C,-1.9330401168,1.7804577486,-0.2123293537\H,-3.3015899712,1.09  
57548367,1.3287390013\H,-4.1112983266,1.4082313179,-0.2127654481\H,-3.003813249,-0.5610437567,-1.2  
286023051\C,-3.7737831256,-1.4946419956,0.4558489095\C,-0.7169345329,-1.572415413,-0.7907079818\C,-  
1.2298367556,-1.2273982325,1.6304584394\H,0.0490152453,0.8770286299,-0.5034837005\H,-0.423925174,1.0  
698596788,1.1823173973\C,-1.9441764224,2.0012182249,-1.73150564\C,-1.804945895,3.1330022359,0.4875  
36922\H,-0.7494470381,-1.1445903661,-1.7988434728\H,-1.2255201892,-2.5420377698,-0.8146869833\H,0.3  
333105474,-1.7379722074,-0.5268095692\H,-1.7559304209,-0.6230597411,2.3773582504\H,-0.1696736535,-  
1.2544164309,1.902660712\H,-1.6151737457,-2.252015603,1.6812852888\H,-1.9784385699,1.0591211113,-2.  
2878685338\H,-1.0385218416,2.5324649655,-2.0436722614\H,-2.8098068669,2.6025884835,-2.0310088485\  
H,-1.8127969965,3.0126106019,1.5761196161\H,-2.6332845132,3.7955072259,0.2122886342\H,-0.87004605  
37,3.6311862385,0.2075646175\O,-3.8997817,-2.6104674622,0.0061278213\O,-4.3937775856,-1.1144759069,  
1.5926131643\H,-4.8957199291,-1.881373892,1.9098545184\Version=ES64L-G09RevD.01\State=1-A\HF=-5  
42.1734101\RMSD=3.381e-09\RMSF=9.187e-06\Dipole=0.1945471,0.6537686,0.3056622\Quadrupole=2.2514  
024,-4.0013919,1.7499895,-0.9447774,-2.0008016,-3.4981032\PG=C01 [X(C10H18O2)]\@

### Model 1.3

1\1\GINC-R37\FOpt\RM062X\6-31+G(d,p)\C10H18O2\ROOT\20-Dec-2017\0\#M062X/6-31+G(d,p) SCF=Tight  
INT(grid=ultrafine) OPT IOP(2/17=4) maxdisk=12GB\1.c.freq\0,1\C,-0.1632170179,1.14617627,0.21066  
3799\C,-0.9449933977,0.2045938427,-0.7254808205\C,-1.0463086514,-1.1811292354,-0.0375086578\C,0.050  
9628689,-1.1386897755,1.0701094543\C,-1.0585653596,1.7440389613,1.3052369907\C,0.4972570899,2.2922  
173026,-0.5582895069\C,-0.7738086013,-2.303170674,-1.0467133496\C,-2.4335380675,-1.4131977998,0.577  
1174342\H,0.7034820881,-2.015691493,1.0189856873\H,-0.4114587812,-1.1385187034,2.0630433503\H,0.23  
08376708,-2.2087947929,-1.4663071953\H,-1.501882265,-2.2645194876,-1.8653269032\H,-0.86126236,-3.28  
46344858,-0.5663561868\H,-2.7219300346,-0.6096629594,1.2615862548\H,-2.4522108635,-2.355713471,1.1  
361961884\H,-3.1954877461,-1.4741603211,-0.2076981878\H,-1.8931761151,2.2932524691,0.8564592877\H,  
-0.4856337009,2.4428953895,1.9244204917\H,-1.474776605,0.9788476849,1.965542784\H,1.1187192069,1.9  
219445748,-1.3806735899\H,1.1262238054,2.9017676612,0.0989404282\H,-0.2725147018,2.9400447768,-0.9  
911769808\C,0.8483515376,0.1680526119,0.8918440895\C,2.0577920369,-0.0275772011,0.0130615239\H,1.  
1975956121,0.5857009882,1.8414044794\O,2.1424674811,-0.7937181074,-0.9193558208\O,3.075065685,0.7  
923719003,0.3508673923\H,3.7931888093,0.6333384913,-0.2815726866\H,-1.9300091426,0.6169461632,-0.9  
776241828\H,-0.3858504806,0.0993294196,-1.6634755669\Version=ES64L-G09RevD.01\State=1-A\HF=-54  
2.1736086\RMSD=5.111e-09\RMSF=1.223e-05\Dipole=-0.0760235,0.4684733,0.3737273\Quadrupole=2.5993  
451,-1.2705335,-1.3288116,1.1647398,0.0053985,-2.1729477\PG=C01 [X(C10H18O2)]\@

### Model 3a

1\1\GINC-R45\FOpt\RM062X\6-31+G(d,p)\C17H20\ROOT\01-Dec-2017\0\#M062X/6-31+G(d,p) SCF=Tight  
INT(grid=ultrafine) OPT IOP(2/17=4) maxdisk=12GB\3.freq\0,1\C,-1.7740338871,1.158448735,0.93900264  
52\C,-2.8587005532,0.834471993,-0.0828480611\C,-2.5225529076,0.2430302026,-1.3466810141\C,-1.180410  
2954,-0.1168139709,-1.7057467912\C,-0.0180908264,0.1469818332,-0.7538185236\C,-0.5435811997,0.27423  
4603,0.6844609518\C,-2.2382275112,0.8504475569,2.3739571662\C,-1.4518269395,2.6651894384,0.8664908  
517\C,0.980348989,-1.0249462958,-0.746385151\C,0.7434027276,1.4034192452,-1.2235336754\H,0.2766519  
922,0.6145947505,1.3315261185\H,-0.8041166974,-0.7393152666,1.0208191582\H,-2.5888155948,-0.182476  
0995,2.461952724\H,-3.042019362,1.5153537821,2.7008182937\H,-1.3999751851,0.9901086097,3.06574526  
51\H,-1.2709744974,3.004166255,-0.1541406051\H,-0.5703589828,2.8997449839,1.4747605546\H,-2.298477  
0093,3.2420006672,1.2528284276\H,0.4756851743,-1.9712777325,-0.5288913781\H,1.7383255229,-0.852899  
3122,0.0260716944\H,1.5059912968,-1.1269361234,-1.6994411977\H,0.0806831317,2.2500310071,-1.405519  
0907\H,1.2615665491,1.1905378134,-2.1642560809\H,1.4919742006,1.6989928456,-0.4790572895\C,-3.5705  
773763,0.0059606255,-2.2914243504\C,-4.9084758366,0.3523104389,-1.9682568225\C,-5.2041408668,0.920  
0090495,-0.7579564288\C,-4.1729116387,1.1580654505,0.1778108098\C,-0.9430751816,-0.6657018294,-2.94  
78064442\C,-1.9811464836,-0.8953375543,-3.8777958265\C,-3.2709403279,-0.5696036029,-3.5535191682\H,-

5.6882055491,0.1610962404,-2.7004466561\H,-6.2263245115,1.1880616901,-0.5093012866\H,-4.4348537609,1.6124651594,1.1282272375\H,0.0702750039,-0.933474385,-3.2305855215\H,-1.7487377253,-1.3328123899,-4.8437889789\H,-4.083133881,-0.7416784137,-4.2545015565\Version=ES64L-G09RevD.01\State=1-A\HF=-659.6237896\RMSD=6.239e-09\RMSF=4.663e-05\Dipole=0.1888227,0.0771284,0.1495984\Quadrupole=2.6747453,-4.2555512,1.5808059,-1.1610348,0.3493593,3.0541724\PG=C01 [X(C17H20)]\@

### Model 3b

1\1\GINC-R37\FOpt\RM062X\6-31+G(d,p)\C17H19N1O2\ROOT\04-Dec-2017\0\#M062X\6-31+G(d,p) SCF=Tight INT(grid=ultrafine) OPT IOP(2/17=4) maxdisk=20GB\4.freq\0,1\C,-2.469015717,0.923109525,0.0320185563\C,-1.0016153885,1.2846491524,-0.1526071301\C,-0.0080658862,0.2509409946,-0.0616297595\C,-0.3780167242,-1.1307445283,0.0387653023\C,-1.8149536095,-1.6073063867,-0.1697693383\C,-2.7197415508,-0.4460264779,-0.6127838929\C,-3.4124068208,1.9230299278,-0.6514523992\C,-2.7707601989,0.9350635172,1.5444895188\C,-1.8398441526,-2.6489589022,-1.3081138727\C,-2.350228314,-2.2999543148,1.0995898414\H,-3.7668511946,-0.7361447748,-0.4535824932\H,-2.5954386181,-0.311649752,-1.6961381653\H,-3.1693727332,-2.0387666135,-1.7125260302\H,-3.3815032195,2.9085448648,-0.1790816854\H,-4.4426847375,1.560308078,-0.5731879275\H,-2.0289218372,0.3708543187,2.1142502807\H,-3.7632992758,0.5149337346,1.7450372623\H,-2.7496521494,1.9646650652,1.9153839585\H,-1.3751373856,-2.2489341278,-2.2142419259\H,-2.87830782,-2.910710519,-1.5398568447\H,-1.3176309915,-3.568951896,-1.0317953275\H,-2.3428844467,-1.6485399326,1.9736928802\H,-1.7504472864,-3.1832052649,1.3386270695\H,-3.3797692267,-2.6325770393,0.9279659603\C,1.379772453,0.6220212421,-0.0502781201\C,1.7387213253,1.9920487109,-0.1807099579\C,0.7651857315,2.9453257953,-0.3107079163\C,-0.6011736319,2.5927041262,-0.2885480329\C,0.6009146004,-2.073998376,0.2790831299\C,1.9563209946,-1.7245652825,0.36533261\C,2.3256152983,-0.4220390301,0.1570593927\H,2.7809039132,2.2773249016,-0.181948798\H,1.0460905743,3.9887454059,-0.4128401976\H,-1.3417347667,3.3817764895,-0.357784852\H,0.3334342039,-3.1210940786,0.3761341501\H,2.7189102502,-2.4709820378,0.5541689511\N,3.7741993775,-0.1670778045,0.159080355\O,4.2156677753,0.6782826308,-0.6015773862\O,4.459291186,-0.8467105682,0.9048408344\Version=ES64L-G09RevD.01\State=1-A\HF=-864.0530096\RMSD=4.389e-09\RMSF=3.419e-06\Dipole=-2.3273307,-0.2080688,-0.0201917\Quadrupole=-11.250034,11.5386554,-0.2886214,-0.3173228,-0.4278131,0.5650841\PG=C01 [X(C17H19N1O2)]\@

### Model 3c

1\1\GINC-R46\FOpt\RM062X\6-31+G(d,p)\C17H18N2O4\ROOT\01-Dec-2017\0\#M062X\6-31+G(d,p) SCF=Tight INT(grid=ultrafine) OPT IOP(2/17=4) maxdisk=12GB\5.freq\0,1\C,-1.7286396726,1.0265491175,1.006840995\C,-2.7778495504,0.9001225828,-0.0971812037\C,-2.5075499382,0.2291718935,-1.336888934\C,-1.1736115081,-0.1843571381,-1.685388455\C,-0.0090897595,0.2847725224,-0.8267525895\C,-0.4486253235,0.2564216736,0.6425493317\C,-2.2806727753,0.3870838219,2.2982248398\C,-1.4359774079,2.5090803615,1.3145886138\C,1.2212836899,-0.6241773917,-0.9524266657\C,0.3838282448,1.6966177342,-1.3092833237\H,0.3728645039,0.6227447799,1.2718236922\H,-0.5962744194,-0.7993967317,0.9080808221\H,-2.6046711768,-0.6422431172,2.1184209624\H,-3.1271988851,0.9479491907,2.7032512223\H,-1.4945048882,0.3731137349,3.0610562191\H,-1.0629790797,3.0576659806,0.4493806542\H,-0.6873088628,2.5752567824,2.11129602\H,-2.3401780892,3.0155902126,1.6646951043\H,0.9735147625,-1.6663021907,-0.7269858668\H,1.9867294876,-0.2936444133,-0.2430918444\H,1.6673400958,-0.5797914424,-1.9496469512\H,-0.4813997058,2.3578965656,-1.3935857698\H,0.842876639,1.6332533724,-2.3007249412\H,1.1072171838,2.1487075587,-0.6213316839\C,-3.5795977202,-0.0162290682,-2.2549762484\C,-4.8233356352,0.6167013027,-1.9902498637\C,-5.0614887063,1.2938604644,-0.8256471963\C,-4.0445165985,1.393235343,0.1359921565\C,-0.9655159116,-0.9001302056,-2.8401474508\C,-2.0414063544,-1.2890743166,-3.661567743\C,-3.3056879834,-0.8707962886,-3.3618945443\N,-5.863500546,0.7474356242,-3.0240325895\H,-6.030237171,1.7558755272,-0.6734724662\H,-4.2671297431,1.8975567094,1.0703605654\H,0.0336810214,-1.2108717909,-3.1203650022\H,-1.8905407656,-1.9358991983,-4.5183461901\N,-4.3865358576,-1.5060817171,-4.1338049366\O,-5.4007154108,-1.7967278875,-3.5222489202\O,-4.1720917881,-1.7644712572,-5.3009657709\O,-5.4817637894,0.8861514206,-4.1737713276\O,-7.0213206049,0.7837698784,-2.6591127202\Version=ES64L-G09RevD.01\State=1-A\HF=-1068.4740987\RMSD=4.566e-09\RMSF=4.542e-06\Dipole=2.9756064,0.743804,2.5301\Quadrupole=-2.7778677,3.8566041,-1.0787364,-5.7297116,-11.4612544,1.5079909\PG=C01 [X(C17H18N2O4)]\@

### Model 4a

1\1\GINC-R46\FOpt\RM062X\6-31+G(d,p)\C13H18\ROOT\01-Dec-2017\0\#M062X\6-31+G(d,p) SCF=Tight INT(grid=ultrafine) OPT IOP(2/17=4) maxdisk=12GB\8.freq\0,1\C,-0.6606864258,-0.2634187835,1.4504642592\C,-0.6269877672,0.1111240432,0.1064425382\C,0.7930777879,0.3590225982,-0.3729440146\C,1.5845294547,0.3888648474,0.9639116768\C,0.7322166088,-0.3174173249,2.0544151139\C,-1.8725445236,-0.5602512524,2.0698215101\C,-3.0540222713,-0.4744593485,1.3321265979\C,-3.0203012064,-0.0996674882,-0.0127887631\C,-1.8047825785,0.192887047,-0.6327645786\C,0.813031324,0.4249662526,3.392441029\C,1.1621229

429,-1.7786296727,2.2655929638\C,0.9264023594,1.6850255489,-1.1291969333\C,1.251240677,-0.78813303  
56,-1.2887375419\H,1.736299394,1.4345901557,1.2591326172\H,2.5772492636,-0.0655194038,0.862177431  
2\H,-1.9034709537,-0.851706736,3.1171924032\H,-4.0051233651,-0.6976376088,1.8057889184\H,-3.945373  
1802,-0.0335458007,-0.5772598306\H,-1.7831875307,0.4851801041,-1.6801360282\H,0.4538343859,1.45365  
42211,3.2903695517\H,1.8485483229,0.4538479008,3.749905543\H,0.2092083276,-0.0731618929,4.1587677  
508\H,1.1290052306,-2.3463028866,1.3316710195\H,0.497257337,-2.2742713902,2.9812339829\H,2.183470  
0904,-1.822410275,2.6602665013\H,0.5495458466,2.5174366545,-0.5269421007\H,0.3653772576,1.6625734  
42,-2.0698016553\H,1.9769615888,1.88109366,-1.3716697869\H,1.1820862357,-1.7563354957,-0.785387248  
3\H,2.290318677,-0.6348445592,-1.6012331276\H,0.6268547693,-0.8338642465,-2.1875700897\Version=ES  
64L-G09RevD.01\State=1-A\HF=-506.0368351\RMSD=4.243e-09\RMSF=1.103e-05\Dipole=0.1965358,-0.00  
02044,0.0048708\Quadrupole=1.5040406,-3.0320404,1.5279998,0.4625717,0.1188478,-1.3642808\PG=CS [S  
G(C1H2),X(C12H16)]\@

#### Model 4b.1

1\1\GINC-R47\FOpt\RM062X\6-31+G(d,p)\C14H18O2\ROOT\01-Dec-2017\0\#M062X/6-31+G(d,p) SCF=Ti  
ght INT(grid=ultrafine) OPT IOP(2/17=4) maxdisk=12GB\9.freq\0,1\C,-0.6600778043,-0.3077158265,1.4186  
601474\C,-0.6158015326,0.0827314371,0.0784285386\C,0.8049648677,0.3623989872,-0.3770724051\C,1.577  
886567,0.3925098335,0.970509039\C,0.7247181686,-0.3411661743,2.0422569371\C,-1.8714249944,-0.63240  
42392,2.0186798002\C,-3.0433018666,-0.5562148672,1.2580858764\C,-3.0001291125,-0.1651727061,-0.0847  
858161\C,-1.7837240011,0.1539290958,-0.6800312554\C,0.770200906,0.3896325378,3.3882035115\C,1.1786  
971541,-1.7961755502,2.2452710357\C,0.9214766835,1.6981239748,-1.1190887423\C,1.2922842375,-0.7686  
820279,-1.2984166339\H,1.7071454905,1.4374576548,1.2783881255\H,2.5795332022,-0.0430081824,0.8767  
012291\H,-1.924537084,-0.9372261521,3.0598732634\C,-4.3712335909,-0.881315603,1.8403142458\H,-3.931  
0943705,-0.115955431,-0.6401744231\H,-1.7516877976,0.4589043878,-1.7228593133\H,0.3939564639,1.412  
6036242,3.2907079169\H,1.7994348143,0.4338709119,3.7612893187\H,0.1644916231,-0.1271888121,4.1403  
225624\H,1.1725539808,-2.3551680266,1.3056008533\H,0.5125490698,-2.3117806372,2.945239608\H,2.194  
0094022,-1.8234688699,2.656074326\H,0.5213425164,2.5178835249,-0.5146180118\H,0.3748906648,1.6739  
544911,-2.0679126276\H,1.9714579563,1.9153687785,-1.3441662303\H,1.2343889866,-1.7429535279,-0.805  
7221868\H,2.3321793219,-0.5932361357,-1.5951214838\H,0.6806573537,-0.8155967819,-2.2057142936\O,-5.4  
212496043,-0.8357148626,1.2414206288\O,-4.3077130491,-1.2454612334,3.1392321566\H,-5.215344623,-1.  
434343592,3.4206943024\Version=ES64L-G09RevD.01\State=1-A\HF=-694.5597823\RMSD=4.460e-09\RM  
SF=5.359e-06\Dipole=1.0963725,0.0508016,0.209274\Quadrupole=-4.2689387,-0.748251,5.0171897,0.929610  
7,-4.3786635,-2.3782682\PG=C01 [X(C14H18O2)]\@

#### Model 4b.2

1\1\GINC-R85\FOpt\RM062X\6-31+G(d,p)\C14H18O2\ROOT\01-Dec-2017\0\#M062X/6-31+G(d,p) SCF=Ti  
ght INT(grid=ultrafine) OPT IOP(2/17=4) maxdisk=12GB\9.b.freq\0,1\C,-0.6684285897,-0.2987369491,1.409  
7158479\C,-0.61839389,0.0944001436,0.0695260466\C,0.8056148728,0.3653250418,-0.3813059129\C,1.5749  
953602,0.387632973,0.9686083912\C,0.7141487014,-0.3422066247,2.0368157124\C,-1.8831810181,-0.61584  
6188,2.0032177523\C,-3.053355209,-0.5309647478,1.24152901\C,-3.0061734992,-0.1374532116,-0.10065289  
83\C,-1.7834790352,0.1747099385,-0.6907405189\C,0.7594524234,0.3857995042,3.3842676994\C,1.1571789  
805,-1.8007684995,2.2387008663\C,0.9337988458,1.7014720356,-1.1205879743\C,1.2880915164,-0.7676100  
29,-1.3029324394\H,1.7105815321,1.4310954377,1.278849664\H,2.5739532866,-0.0543658714,0.876507504  
8\H,-1.9572097746,-0.9242621636,3.0429175582\C,-4.337371073,-0.8689339907,1.9085757966\H,-3.9264924  
14,-0.0762944895,-0.6707977351\H,-1.7469079302,0.4815794238,-1.7328796658\H,0.3910440414,1.4116696  
923,3.287081914\H,1.7874659923,0.421914158,3.7615607334\H,0.14649715,-0.1278096353,4.1325064711\H,  
1.1493189635,-2.3584595761,1.2981994487\H,0.4856254437,-2.3122560101,2.936369796\H,2.1713284476,-1.8  
357035038,2.6517576915\H,0.5371663188,2.5228998845,-0.5160769946\H,0.3905925649,1.6826518338,-2.0  
715087864\H,1.986059517,1.911957449,-1.3414265482\H,1.2205532636,-1.7422876738,-0.812286169\H,2.33  
0649074,-0.5996548915,-1.5945570316\H,0.6801556383,-0.8079366418,-2.2130682495\O,-4.4473985416,-1.2  
141149051,3.0629155947\O,-5.4078829951,-0.7565071538,1.0936928759\H,-6.1854879645,-0.9967447595,1.  
6193045489\Version=ES64L-G09RevD.01\State=1-A\HF=-694.5598743\RMSD=5.504e-09\RMSF=1.645e-05  
\Dipole=0.592101,0.2494274,-0.705983\Quadrupole=5.1410248,-2.59539,-2.5456348,-0.1699729,3.5064605,0.  
374777\PG=C01 [X(C14H18O2)]\@

#### Model 4c.1

1\1\GINC-R48\FOpt\RM062X\6-31+G(d,p)\C15H18O4\ROOT\01-Dec-2017\0\#M062X/6-31+G(d,p) SCF=Ti  
ght INT(grid=ultrafine) OPT IOP(2/17=4) maxdisk=12GB\10.a.freq\0,1\C,-0.6564735368,-0.2804500602,1.42  
80341239\C,-0.5950189602,0.0538297836,0.0751372118\C,0.8296104747,0.319854547,-0.375388284\C,1.584  
1088457,0.4079047471,0.9807097749\C,0.717812938,-0.2811322985,2.0720510866\C,-1.8752879444,-0.5961

264046,2.0194894949\C,-3.0421896288,-0.5652594893,1.2543129724\C,-2.9847778683,-0.1939481487,-0.0993176798\C,-1.75523017,0.0996867838,-0.6910097437\C,0.7374325526,0.507832848,3.3855463207\C,1.1706095449,-1.7254468501,2.344188384\C,0.9511492565,1.6241707944,-1.1702567248\C,1.330185696,-0.8476399851,-1.2424504364\H,1.7093178661,1.4648174891,1.2460128009\H,2.5863615466,-0.0312485872,0.9184894425\H,-1.9474087547,-0.8798604667,3.0663017865\C,-4.2870825006,-1.0366856885,1.9319587528\C,-4.1926968698,0.0135659823,-0.9534866594\H,-1.7372263219,0.379454152,-1.7411325724\H,0.3605117857,1.5243790475,3.23773676\H,1.7603812256,0.5714929446,3.7722807935\H,0.1206581442,0.0223597732,4.1492267726\H,1.1783517768,-2.3252131323,1.4300453176\H,0.4978486945,-2.2114340879,3.058752774\H,2.180520112,-1.7304328604,2.7683185792\H,0.5408431492,2.4670225586,-0.605644531\H,0.4184165851,1.5585547408,-2.124821355\H,2.003456916,1.8354352575,-1.3893214597\H,1.2715609823,-1.8002566402,-0.7090947693\H,2.3723266431,-0.680117192,-1.5352874866\H,0.7283623294,-0.9361044608,-2.1530563937\O,-4.5468014746,-0.8406619328,3.0947032308\O,-5.0591151218,-1.7949501743,1.1319626672\H,-5.8383601168,-2.0533285783,1.6476333787\O,-4.2382847294,-0.2183173958,-2.1375408751\O,-5.2120428361,0.5820121,-0.2837115631\H,-5.9471002302,0.6776208842,-0.9085918915\Version=ES64L-G09RevD.01\State=1-A\HF=-883.0698369\RMSD=4.303e-09\RMSF=2.707e-06\Dipole=0.7802819,0.0650017,0.0489029\Quadrupole=10.334346,-0.7615685,-9.5727775,1.4148994,1.8289927,-3.6868272\PG=C01 [X(C15H18O4)]\@

### Model 4c.2

1\GINC-R49\FOpt\RM062X\6-31+G(d,p)\C15H18O4\ROOT\01-Dec-2017\0\#M062X/6-31+G(d,p) SCF=Ti ght INT(grid=ultrafine) OPT IOP(2/17=4) maxdisk=12GB\10.b.freq\0,1\C,-0.6399743893,-0.2923350038,1.4406929837\C,-0.5919596255,0.1094941506,0.106269177\C,0.8302542843,0.3717722865,-0.3532568058\C,1.6079818529,0.3713233321,0.9925477129\C,0.7445431127,-0.3574461583,2.0599627393\C,-1.8589368264,-0.585389403,2.0436255214\C,-3.0374650913,-0.4819045766,1.3000971438\C,-2.9843860608,-0.105253605,-0.0520409473\C,-1.7608691399,0.2034708064,-0.6439281198\C,0.8076609766,0.3568584242,3.414009803\C,1.1679955683,-1.824422239,2.2438081578\C,0.9622433845,1.7157972278,-1.0773829573\C,1.2953633173,-0.7547836971,-1.2913176034\H,1.7597083847,1.4097516013,1.3115027427\H,2.5996100717,-0.084180213,0.890165017\H,-1.9172517464,-0.8696056355,3.0902379516\C,-4.3537249226,-0.6281555539,1.9837441027\C,-4.1864826319,-0.0652746793,-0.9446581883\H,-1.7452734663,0.5090429752,-1.6869971856\H,0.4487147105,1.3872386247,3.3307237371\H,1.8395283701,0.3795615467,3.7810908587\H,0.1985974805,-0.1591153163,4.1639326008\H,1.1476532351,-2.3717344876,1.2975306925\H,0.4941255275,-2.3346803209,2.9402581925\H,2.1838713953,-1.8764360383,2.6502935051\H,0.5784078601,2.5332586071,-0.459613725\H,0.4096073555,1.713590761,-2.0227887484\H,2.0141828962,1.9194085295,-1.3053917518\H,1.2248225873,-1.7347627257,-0.8116093677\H,2.3365493864,-0.5910393627,-1.5895553604\H,0.6805005215,-0.7796042506,-2.1972203691\O,-5.376241386,-0.0891292326,1.6353340965\O,-4.2843786975,-1.3972880905,3.0894404435\H,-5.1670873338,-1.3927804878,3.4897610504\O,-4.4305620527,0.8350706639,-1.7096976022\O,-4.9101620062,-1.1954200579,-0.8841896911\H,-5.6841669022,-1.0724384016,-1.4549998069\Version=ES64L-G09RevD.01\State=1-A\HF=-883.0697589\RMSD=7.486e-09\RMSF=3.920e-06\Dipole=1.2562936,-0.6965143,0.6510061\Quadrupole=1.6997515,-4.7241196,3.0243681,7.3128372,-3.7152249,1.5701299\PG=C01 [X(C15H18O4)]\@

### Model 4c.3

1\GINC-R39\FOpt\RM062X\6-31+G(d,p)\C15H18O4\ROOT\06-Dec-2017\0\#M062X/6-31+G(d,p) SCF=Ti ght INT(grid=ultrafine) OPT IOP(2/17=4) maxdisk=12GB\10.c.freq\0,1\C,0.4606134933,1.4988009241,0.2431564939\C,-0.6623621808,1.0585492404,-0.4547127434\C,-1.6935323302,2.1604607645,-0.6169615588\C,-1.1620487406,3.2441223806,0.3623899768\C,0.3389344215,2.9569974035,0.6465513475\C,1.5338123688,0.6397273675,0.4656272676\C,1.4741843181,-0.6709294123,-0.0081527408\C,0.3314626646,-1.1222738352,-0.6880816145\C,-0.7324719053,-0.2511308805,-0.922843745\C,0.6818672274,3.1761916868,2.1238465498\C,1.2681082349,3.8225602835,-0.2208394549\C,-3.1016645491,1.6972514662,-0.2290376129\C,-1.7084232096,2.6534034283,-2.0736686506\H,-1.7188989107,3.1706937773,1.3045507175\H,-1.3169063681,4.2567847522,-0.0272551619\H,2.4245628759,0.9732807892,0.9908432126\C,2.6927382917,-1.5307653318,0.0872016331\C,0.1706619193,-2.5679976819,-1.0309508786\H,-1.6096947973,-0.6162997362,-1.4496775999\H,0.0804709665,2.52598529,2.7663942385\H,0.4875851154,4.2166399841,2.4063203899\H,1.7390138831,2.9684814741,2.3208902572\H,1.0528751931,3.7031471378,-1.2861074194\H,2.3151786598,3.5460103409,-0.0575013936\H,1.1498874235,4.8802376588,0.0384724578\H,-3.1117877488,1.2773445386,0.7814388978\H,-3.4734216124,0.9343244067,-0.9213216258\H,-3.7984076492,2.5420549831,-0.258677729\H,-0.7227800493,3.0044816543,-2.3908464469\H,-2.420826936,3.4779097022,-2.186005907\H,-2.0096417526,1.8462800835,-2.7498553654\O,3.0881287744,-2.2621657789,-0.7854200473\O,3.3631682103,-1.3438501288,1.2416727881\H,4.1552763365,-1.9014524709,1.1996458332\O,0.5317489613,-3.4842056492,-0.3360735058\O,-0.5026574806,-2.7489571031,-2.1847641773\H,-0.599693119,-3.7060735093,-2.3055866824\Version=ES64L-G09RevD.01\State=1-A\HF=-883.0684621\RMSD=7.389e-09\RMSF=2.358e-05\Dipole=-0.6372945,1.4121075,0.1328525\Quadrupole=4.5452114,-2.5409202,-2.0042911,3.1682253,5.8910517,2.4941816\PG=C01 [X(C15H18O4)]\@

#### Model 4d.1

I\1\GINC-R51\FOpt\RM062X\6-31+G(d,p)\C13H18O1\ROOT\01-Dec-2017\0\#M062X\6-31+G(d,p) SCF=Ti  
ght INT(grid=ultrafine) OPT IOP(2/17=4) maxdisk=12GB\11.a.freq\0,1\C,-0.6444768906,-0.3006948919,1.43  
74580919\C,-0.5907393733,0.0532673127,0.0875297284\C,0.8315695373,0.3464037424,-0.3577376015\C,1.5  
84044735,0.4293426148,0.9992440124\C,0.7320063456,-0.2935910565,2.0795390063\C,-1.8651833209,-0.62  
92830916,2.0172392726\C,-3.0278904432,-0.5983647656,1.2461903662\C,-2.9610734867,-0.2430374642,-0.1  
032837521\C,-1.7395975001,0.0841897918,-0.6938658674\C,0.7506463399,0.4727657719,3.4064228443\C,1.  
2166477842,-1.7317349825,2.3269517648\C,0.9353961587,1.6628456531,-1.1347346911\C,1.3554913937,-0.  
7992753591,-1.2395135086\H,1.6850265,1.4850721585,1.280226445\H,2.5969328348,0.0148111976,0.93103  
12806\H,-1.9273348441,-0.9063578731,3.0669834135\H,-1.7212529778,0.358420634,-1.7449834995\H,0.357  
3578849,1.4857884698,3.2772524504\H,1.7740533439,0.5448838963,3.7918043435\H,0.1442260941,-0.0348  
789143,4.1646851391\H,1.2301940052,-2.315466379,1.4025204267\H,0.5543246562,-2.2427318765,3.03429  
98351\H,2.228539782,-1.7279222766,2.7478306562\H,0.5104199516,2.4906082323,-0.5586843271\H,0.4024  
778344,1.6024461603,-2.089758682\H,1.9843529338,1.89447699,-1.3511857828\H,1.3060650846,-1.7605563  
955,-0.7208691007\H,2.3971988769,-0.6137489995,-1.5243732527\H,0.7595146909,-0.8823585529,-2.15462  
7449\H,-3.9880262295,-0.8469616316,1.6922997302\O,-4.0702910054,-0.1952592368,-0.8999011958\H,-4.85  
17806958,-0.4356888783,-0.3901900971\Version=ES64L-G09RevD.01\State=I-A\HF=-581.2379443\RMSD  
=7.514e-09\RMSE=1.332e-05\Dipole=-0.0549081,-0.1407857,0.4597101\Quadrupole=5.5031041,-3.5516054,-  
1.9514986,2.2093448,-3.4009026,-0.9966923\PG=C01 [X(C13H18O1)]\@

#### Model 4d.2

I\1\GINC-R41\FOpt\RM062X\6-31+G(d,p)\C13H18O1\ROOT\01-Dec-2017\0\#M062X\6-31+G(d,p) SCF=Ti  
ght INT(grid=ultrafine) OPT IOP(2/17=4) maxdisk=12GB\11.b.freq\0,1\C,-0.6422315184,-0.2938322436,1.43  
56980724\C,-0.5873582114,0.0624488728,0.0901531624\C,0.8349277862,0.3504168734,-0.3584476649\C,1.5  
896691485,0.4261652348,0.9977481673\C,0.7342941327,-0.2933823616,2.0776420363\C,-1.8668475616,-0.6  
217397035,2.0160157733\C,-3.029120069,-0.5864027103,1.2509685177\C,-2.9627509301,-0.2270363352,-0.0  
9805813\C,-1.7413669227,0.0979665195,-0.6893239017\C,0.7560470222,0.4727469553,3.4046584197\C,1.21  
22677563,-1.733739586,2.3248757614\C,0.9443475274,1.6687181276,-1.1316477123\C,1.3535552744,-0.794  
9889882,-1.2436995529\H,1.6977173679,1.4807206543,1.2803608852\H,2.5997975604,0.005385175,0.92701  
03028\H,-1.9263208666,-0.9015802049,3.0652291942\H,-1.6999901569,0.3782238388,-1.7411550065\H,0.36  
75781995,1.4876313499,3.2754994923\H,1.7795523871,0.5397950348,3.790709704\H,0.1465656038,-0.0320  
464831,4.1622180852\H,1.2254633075,-2.3167304896,1.3999075505\H,0.5459466268,-2.242558981,3.02990  
40666\H,2.223091825,-1.734810454,2.7483192301\H,0.5224470144,2.4965705598,-0.5534974467\H,0.41279  
1039,1.613492722,-2.0881448766\H,1.9941105245,1.8970538492,-1.3473934214\H,1.3009819293,-1.7570036  
47,-0.7268932787\H,2.3954859188,-0.6129018315,-1.5298531298\H,0.7567936689,-0.8744211952,-2.158887  
696\H,-3.9970936097,-0.8292300936,1.6759365544\O,-4.1392092802,-0.208411602,-0.7927764492\H,-3.9769  
924942,0.0536311432,-1.7056867091\Version=ES64L-G09RevD.01\State=I-A\HF=-581.2378712\RMSE=3.9  
40e-09\RMSE=1.386e-05\Dipole=0.5292213,0.1589158,-0.3839127\Quadrupole=-3.2041044,-2.5501704,5.754  
2748,-0.4732072,1.8062776,-2.0762826\PG=C01 [X(C13H18O1)]\@

#### Model 4e.1

I\1\GINC-R47\FOpt\RM062X\6-31+G(d,p)\C14H20O1\ROOT\01-Dec-2017\0\#M062X\6-31+G(d,p) SCF=Ti  
ght INT(grid=ultrafine) OPT IOP(2/17=4) maxdisk=12GB\12.a.freq\0,1\C,-0.620533209,-0.303064467,1.4804  
461622\C,-0.5899093238,0.0485513042,0.1362357928\C,0.8242893171,0.340987467,-0.3363408537\C,1.6015  
092788,0.4219815883,1.0067388864\C,0.7645924799,-0.2950104605,2.1025888772\C,-1.836955504,-0.63592  
51987,2.0805902045\C,-3.0050643072,-0.6074914622,1.3311238169\C,-2.9660055572,-0.251130304,-0.02501  
65977\C,-1.7538931137,0.0784070389,-0.6354488393\C,0.8025912088,0.4778173264,3.4254175752\C,1.2509  
500576,-1.7325596973,2.3501451253\C,0.9171580955,1.6582866586,-1.1135835976\C,1.3326204573,-0.8039  
881327,-1.2280579582\H,1.7132435605,1.4774742924,1.2843931814\H,2.6107300667,0.0017329933,0.92094  
36194\H,-1.881096253,-0.9133081363,3.1312648242\H,-1.706987672,0.3572614959,-1.683082987\H,0.40898  
06335,1.4908148543,3.2965965096\H,1.8312177031,0.5502871121,3.7966660708\H,0.2055067966,-0.025049  
6114,4.1940986906\H,1.2550942113,-2.3194172464,1.4274829844\H,0.5954062916,-2.2410359753,3.065532  
2132\H,2.2669164517,-1.7280979667,2.7612050263\H,0.5036775552,2.4861611728,-0.5293469481\H,0.3686  
612842,1.600156406,-2.0602818915\H,1.9625019081,1.8885041908,-1.3482602536\H,1.2928138355,-1.76499  
23887,-0.7081234986\H,2.3687559488,-0.6184995373,-1.5327069157\H,0.7203321869,-0.887907986,-2.1325  
495644\H,-3.9673366083,-0.8532903718,1.7676884219\O,-4.1697317434,-0.2524943154,-0.6650361104\C,-4.  
1857900712,0.0972891266,-2.0317553781\H,-5.2265692579,0.0343039085,-2.3477913042\H,-3.5812240652,-  
0.5979303654,-2.6268926451\H,-3.8193426429,1.1197166871,-2.1844826392\Version=ES64L-G09RevD.01\

State=1-A\HF=-620.5190903\RMSD=8.577e-09\RMSF=6.370e-06\Dipole=0.2942369,0.144837,-0.46346\Quadrupole=-1.0387137,-3.415656,4.4543697,-0.4132793,3.1403511,-1.7459233\PG=C01 [X(C14H20O1)]\@

#### Model 4e.2

1\1\GINC-R48\FOpt\RM062X\6-31+G(d,p)\C14H20O1\ROOT\01-Dec-2017\0\#M062X\6-31+G(d,p) SCF=Tight INT(grid=ultrafine) OPT IOP(2/17=4) maxdisk=12GB\12.b.freq\0,1\C,-0.6191261055,-0.2933677583,1.5023262716\C,-0.5908975419,0.0599581355,0.1491571905\C,0.8244100092,0.3422788285,-0.3252039527\C,1.6048807014,0.4214300006,1.0161968906\C,0.7708836045,-0.295367768,2.1145480451\C,-1.828497963,-0.6108958643,2.1042595078\C,-3.014338627,-0.5740572824,1.3624870489\C,-2.9731871982,-0.2198341124,0.010317722\C,-1.7547137597,0.098090553,-0.6028145735\C,0.8231521193,0.470819772,3.4405909106\C,1.2508961408,-1.7368238212,2.3518682933\C,0.9224969847,1.6567988604,-1.1061517519\C,1.3226098351,-0.8081329558,-1.2156557054\H,1.7181708108,1.4767301644,1.2942067536\H,2.613546125,0.0004415844,0.927792854\H,-1.8706918322,-0.8865956319,3.1555586137\H,-1.7597609387,0.3711477263,-1.6546197268\H,0.4354860774,1.4869770327,3.3192114124\H,1.8547673457,0.5345639062,3.8050647204\H,0.2279834461,-0.0318672232,4.2109513917\H,1.2399933638,-2.3209496987,1.4276698702\H,0.6005588272,-2.242904019,3.0736643613\H,2.2719101998,-1.7398920929,2.7502340851\H,0.5173743657,2.4888455651,-0.5220353529\H,0.3676699311,1.5992637802,-2.0488046174\H,1.9683184295,1.8791488809,-1.3463371093\H,1.2751016191,-1.7687537078,-0.6956541233\H,2.3602670535,-0.6313698072,-1.5203035577\H,0.7085256538,-0.886682761,-2.119112929\H,-3.9524437263,-0.8176741665,1.8463258233\O,-4.0715574189,-0.1528661649,-0.7948912166\C,-5.3245227638,-0.4647176936,-0.2257981274\H,-6.0555707078,-0.3539696352,-1.02607956\H,-5.5719782737,0.2230785309,0.591844354\H,-5.345935787,-1.4957311567,0.147546184\Version=ES64L-G09RevD.01\State=1-A\HF=-620.5190419\RMSD=6.921e-09\RMSF=1.016e-05\Dipole=-0.2081106,-0.1233148,0.3068759\Quadrupole=6.2949362,-4.2734421,-2.0214941,1.8180592,-1.6358227,-0.8800655\PG=C01 [X(C14H20O1)]\@

#### Model 4f.1

1\1\GINC-R47\FOpt\RM062X\6-31+G(d,p)\C15H22O2\ROOT\01-Dec-2017\0\#M062X\6-31+G(d,p) SCF=Tight INT(grid=ultrafine) OPT IOP(2/17=4) maxdisk=12GB\13.b.freq\0,1\C,-0.5422047772,-0.2596644932,1.4479585543\C,-0.5107044368,0.0927536829,0.1114143807\C,0.9023423963,0.3661125331,-0.3727278153\C,1.6890751165,0.4271161019,0.9665292104\C,0.8448727559,-0.27682745,2.0656491887\C,-1.7543141344,-0.5827011047,2.0713829698\C,-2.9324955668,-0.5416359382,1.3361102374\C,-2.9001661774,-0.179927866,-0.0356394526\C,-1.6903415647,0.1330095258,-0.6429434258\C,0.9025281272,0.4931575115,3.389386799\C,1.3070292526,-1.7231569737,2.3080444595\C,1.0093088399,1.6877287064,-1.1410832974\C,1.3914932596,-0.7781919652,-1.2757851119\H,1.823692767,1.4791369028,1.2470938294\H,2.6890722481,-0.0134105572,0.8739423451\H,-1.7711286738,-0.8578942485,3.1209200152\H,-1.6577057555,0.4109710016,-1.691377579\H,0.5235924805,1.5121988088,3.2642211871\H,1.9343260647,0.5495065669,3.754522504\H,0.303094879,-0.0016276333,4.1618150684\H,1.2968040152,-2.306579609,1.3832455026\H,0.6462231094,-2.2227594231,3.0250381966\H,2.3246527327,-1.7375725318,2.7147257497\H,0.6134181512,2.517072557,-0.5468077884\H,0.4502714108,1.6448634634,-2.0825809117\H,2.0554659082,1.9047132969,-1.3851721987\H,1.3473171325,-1.7414361861,-0.7600831126\H,2.4261419597,-0.6021372229,-1.5914775975\H,0.7687583931,-0.8518571766,-2.1741847127\O,-4.1664723168,-0.8238645466,1.8292775878\O,-4.1078558995,-0.1681371718,-0.6576620373\C,-4.1280419897,0.1844645575,-2.0226348328\H,-5.1719406809,0.134941602,-2.3306127034\H,-3.5360107101,-0.5170525285,-2.6234252597\H,-3.7494111136,1.2026054921,-2.1760809817\C,-4.2507687914,-1.1902658577,3.1881486106\H,-5.3065249199,-1.3734083773,3.3852914519\H,-3.8913617085,-0.3846853974,3.8403657176\H,-3.677401783,-2.103518052,3.3901252526\Version=ES64L-G09RevD.01\State=1-A\HF=-734.9963105\RMSD=7.652e-09\RMSF=7.967e-06\Dipole=0.2833816,0.0183713,0.0115213\Quadrupole=-2.9543449,-3.9314305,6.8857754,0.2867267,-0.1752376,-3.0612033\PG=C01 [X(C15H22O2)]\@

#### Model 4f.2

1\1\GINC-R38\FOpt\RM062X\6-31+G(d,p)\C15H22O2\ROOT\04-Dec-2017\0\#M062X\6-31+G(d,p) SCF=Tight INT(grid=ultrafine) OPT IOP(2/17=4) maxdisk=12GB\13.c.freq\0,1\C,-0.0012251323,0.013947376,2.2518128222\C,2.4619456977,0.005812419,1.5433416655\C,1.0941748681,-0.6809600117,1.3956169656\C,1.2357845773,-2.1607009345,1.767660694\C,0.5574648138,-0.4887272693,-0.0125791806\C,-0.8120485617,0.9698263671,1.3327145073\C,-0.3367129331,2.4270187961,1.4547310347\C,-2.3106929307,0.9063195537,1.6459035996\C,-0.4898477442,0.4217761911,-0.0459788692\C,-1.0885631544,0.7511549752,-1.2633445549\C,-0.6397972844,0.1578179167,-2.4345548232\C,0.418940796,-0.7769498065,-2.3990687713\C,1.0236716772,-1.0932562387,-1.1829373559\O,0.7651176957,-1.319951093,-3.5989545444\C,1.7846940318,-2.2963147706,-3.6018754441\O,-1.2718326665,0.4394903369,-3.6171599546\C,-0.5036145568,1.2293677304,-4.5172751485\H,-0.6790432034,-0.7538047836,2.6450538649\H,0.4265509612,0.5399741911,3.1136463402\H,1.8368712119,-1.8106384343,-1.1387253543\H,-1.9149493554,1.4541385424,-1.3332401373\H,0.2924345403,-2.693617899,1.6136639178\H,1.523725639,-2.2633317536,2.8200065182\H,2.007614585,-2.6496839528,1.1627905139\H,

2.4041895436,1.0700232553,1.2989223135\H,3.196536319,-0.4518240211,0.8716348864\H,2.8303789047,-0.0931922278,2.5706442258\H,-2.6939487386,-0.1100711933,1.5132139558\H,-2.8799517182,1.5736363654,0.9895828225\H,-2.4982530594,1.2153792261,2.6805063213\H,0.7339595198,2.5178011995,1.2514559786\H,-0.5303658334,2.8098491902,2.4631993335\H,-0.867780711,3.0645985715,0.7395730687\H,-1.1266917681,1.3848535848,-5.3986845462\H,0.4178128971,0.7139170049,-4.8031459371\H,-0.2634162755,2.1981085264,-4.0623426239\H,1.8931192217,-2.6156576864,-4.6378525453\H,1.5088157455,-3.1570521545,-2.9811998829\H,2.7349423806,-1.8801070892,-3.2458556765\Version=ES64L-G09RevD.01\State=1-A\HF=-734.9950203\RMSD=1.970e-09\RMSF=1.564e-05\Dipole=0.8672513,-0.1014567,0.1968625\Quadrupole=-2.2828142,1.2132458,1.0695684,-4.3597369,-4.8609357,0.2375456\PG=C01 [X(C15H22O2)]\@

#### Model 4g

I\1\GINC-R47\FOpt\RM062X\Gen\C13H17Br1\ROOT\01-Dec-2017\0\#M062X/gen 6D SCF=Tight INT(grid=ultrafine) OPT IOP(2/17=4) maxdisk=12GB\14.freq\0,1\C,-0.486794536,-0.2575466296,1.4720629545\C,-0.4600767867,0.0969637925,0.1228998962\C,0.9540618649,0.3684303379,-0.3613791709\C,1.7424444541,0.4361845617,0.9760905681\C,0.9059347448,-0.2729053331,2.0771538472\C,-1.6941863602,-0.5685329123,2.0916607674\C,-2.8798802882,-0.5194934015,1.3581267519\C,-2.8317302567,-0.1634062585,0.011749072\C,-1.6332846346,0.1466011026,-0.6256766139\C,0.9687965026,0.4906158941,3.404241838\C,1.3665878266,-1.7215544793,2.3093263293\C,1.0574461985,1.6852249991,-1.1378536777\C,1.4356513401,-0.7837679695,-1.2585614707\H,1.8703547874,1.4893022453,1.255325456\H,2.7449028329,0.0026810163,0.8813152837\H,-1.7268393975,-0.8450138416,3.1426554103\H,-1.627379585,0.4221197827,-1.6761144181\H,0.5879582214,1.5098472101,3.2875165406\H,2.0030408374,0.5465817488,3.7615363699\H,0.3758576138,-0.0096557613,4.1776121249\H,1.3463860112,-2.3037694044,1.3841355389\H,0.7129355385,-2.220885606,3.0325945561\H,2.3883581383,-1.7367696174,2.7044596767\H,0.6599672614,2.5182799173,-0.5500729573\H,0.5012185182,1.6353059813,-2.0801206618\H,2.1039955273,1.9010274981,-1.3798075999\H,1.3875760185,-1.7451665186,-0.7401543059\H,2.4712183996,-0.6123693346,-1.5724186696\H,0.8137572708,-0.857054893,-2.1571026908\H,-3.8314142141,-0.7513466844,1.8231368435\Br,-4.4521538494,-0.0931574425,-0.9820975883\Version=ES64L-G09RevD.01\State=1-A\HF=-3079.3268506\RMSD=8.603e-09\RMSF=1.137e-05\Dipole=0.9551999,-0.0147977,0.4136474\Quadrupole=-0.5342334,-2.0534621,2.5876955,0.7090276,-1.840668,-1.5445126\PG=C01 [X(C13H17Br1)]\@

#### Model 4h

I\1\GINC-R434\FOpt\RM062X\Gen\C13H16Br2\ROOT\20-Dec-2017\0\#M062X/gen 6D SCF=(Tight,XQC) INT(grid=ultrafine) OPT IOP(2/17=4) Nosymm maxdisk=50GB\15.freq\0,1\C,-0.4652497101,-0.2481246647,1.4620491226\C,-0.4378282963,0.10723802,0.1134142727\C,0.9760122097,0.3767259493,-0.3706276012\C,1.7626617999,0.4439458683,0.968350427\C,0.9263455032,-0.266326435,2.0694590734\C,-1.6682767826,-0.5562718464,2.0841316344\C,-2.8537506566,-0.5035724947,1.348164413\C,-2.8262317729,-0.1476047466,-0.0039683272\C,-1.613260526,0.1572757877,-0.6248134326\C,0.9885441528,0.4954283163,3.3974089306\C,1.3839166064,-1.7164102442,2.2986850788\C,1.0808546613,1.6932862783,-1.1473364418\C,1.4564289075,-0.7766550824,-1.26697854\H,1.8894062422,1.4969074186,1.2484311907\H,2.7651256846,0.0107352329,0.8746173887\H,-1.7084038775,-0.8332435557,3.133485822\H,-1.6109879353,0.4334381812,-1.6750615581\H,0.6082788105,1.5149837377,3.2823954372\H,2.0229860229,0.5504336738,3.7537388161\H,0.3963557542,-0.0058898558,4.1705150903\H,1.3624635935,-2.2975129103,1.3728973952\H,0.7307071895,-2.2157188443,3.0221834048\H,2.405914024,-1.732834627,2.6926930122\H,0.6855816317,2.5273401169,-0.5595601316\H,0.5239781346,1.6437448293,-2.089209263\H,2.1274909856,1.9069296253,-1.3901901898\H,1.4051046148,-1.7382380775,-0.7493684788\H,2.4929184879,-0.6073612565,-1.5784021467\H,0.8365094661,-0.8477833549,-2.1670098581\Br,-4.4704855429,-0.9194298393,2.2389368659\Br,-4.4037493828,-0.0556022005,-1.0450134068\Version=ES64L-G09RevD.01\HF=-5652.6118742\RMSD=6.629e-09\RMSF=9.135e-06\Dipole=1.4254948,0.127557,0.0629308\Quadrupole=-5.3860847,0.5510466,4.8350381,-0.6825385,1.8039196,-0.9790831\PG=C01 [X(C13H16Br2)]\@

#### Model 4j

I\1\GINC-R49\FOpt\RM062X\6-31+G(d,p)\C13H17N1O2\ROOT\01-Dec-2017\0\#M062X/6-31+G(d,p) SCF=Tight INT(grid=ultrafine) OPT IOP(2/17=4) maxdisk=12GB\16.freq\0,1\C,-0.5268378269,-0.2965049113,1.4422978152\C,-0.4965450095,0.0767862507,0.095659685\C,0.9167233654,0.3773241895,-0.3686032737\C,1.693302928,0.4414341106,0.9758895398\C,0.8596268823,-0.2945439695,2.0613543229\C,-1.7267148564,-0.6359245329,2.0555091102\C,-2.8812902679,-0.5842376066,1.28066678\C,-2.8804702237,-0.2159948627,-0.061397779\C,-1.6677746118,0.1164956878,-0.6593760056\C,0.8930240529,0.4549973497,3.3972715908\C,1.3405764334,-1.7384535909,2.2815174442\C,1.0043476564,1.7043376735,-1.1300079267\C,1.4212423504,-0.7582689417,-1.2752499519\H,1.8030855077,1.4926852192,1.2690135356\H,2.7025775326,0.0241918609,0.8839631977\H,-1.7914719824,-0.9295257073,3.0978690349\H,-1.6461117081,0.4080804782,-1.7057912288\H,0.



4966845539,1.4690940709,3.2879371243\H,1.9222287083,0.5244932917,3.7657778992\H,0.3008255186,-0.0639251229,4.1584677179\H,1.341674604,-2.3106596344,1.3498639286\H,0.6881434114,-2.2567754062,2.9921186309\H,2.3577196543,-1.7399673519,2.6879235117\H,0.5899427816,2.5251560522,-0.5367896169\H,0.4576224835,1.6558095881,-2.0777520038\H,2.0494422498,1.9382921661,-1.3599248704\H,1.3829879263,-1.7264727514,-0.769012822\H,2.4568515982,-0.567490729,-1.576545452\H,0.8091490408,-0.8288698318,-2.1806307146\N,-4.1656406889,-0.9327150295,1.9120468918\H,-3.814996576,-0.1929743012,-0.6083027386\O,-5.1693668151,-0.8821064616,1.2225971095\O,-4.1493786731,-1.2523672462,3.0883295137\Version=ES64L-G09RevD.01\State=1-A\HF=-710.4730531\RMSD=8.940e-09\RMSF=1.068e-05\Dipole=2.0880832,0.4848539,-0.810592\Quadrupole=-8.3989791,2.996136,5.4028431,-3.099577,5.5509022,0.1841414\PG=C01 [X(C13H17N1O2)]\@

#### Model 4k

1\1\GINC-R49\FOpt\RM062X\6-31+G(d,p)\C13H19N1\ROOT\01-Dec-2017\0\#M062X\6-31+G(d,p) SCF=Ti ght INT(grid=ultrafine) OPT IOP(2/17=4) maxdisk=12GB\17.freq\0,1\C,-0.5425121979,-0.3163222595,1.4322294817\C,-0.503230702,0.0596432626,0.0900480762\C,0.9085640892,0.3774161546,-0.3701690289\C,1.6753843139,0.4457050238,0.9800739736\C,0.8423969431,-0.3033128112,2.0570540852\C,-1.7384522918,-0.6734470525,2.044646588\C,-2.9282352814,-0.6519270474,1.3043775073\C,-2.8864936833,-0.2762859618,-0.0471996392\C,-1.6820222324,0.0759046037,-0.6509879872\C,0.8689472981,0.4392231264,3.3970574438\C,1.3393119778,-1.7425920203,2.2718432773\C,0.9893300582,1.7101275853,-1.1225076777\C,1.4440172427,-0.7410659583,-1.2794769649\H,1.7688330302,1.497549192,1.2779753726\H,2.6916510895,0.0422072889,0.8958198348\H,-1.762317396,-0.9705310593,3.0918426417\H,-1.6755837027,0.3658767065,-1.6994118363\H,0.4598127756,1.4488205655,3.2915356317\H,1.8971709729,0.5195049695,3.7676072094\H,0.2817652394,-0.0901949033,4.1554836531\H,1.3444077425,-2.3088020556,1.3365653814\H,0.6903515345,-2.2714299765,2.9782066439\H,2.3569022275,-1.7376802234,2.6786579663\H,0.5659282517,2.5220634046,-0.5231887356\H,0.4397696836,1.6626503549,-2.0691833436\H,2.0317981623,1.9571024338,-1.3541334024\H,1.4174237137,-1.712502199,-0.7783311869\H,2.4786059173,-0.5331539355,-1.5758686519\H,0.8371017236,-0.8185906242,-2.1881925175\N,-4.1347315293,-1.0554639639,1.8878573729\H,-3.8081361045,-0.2651159437,-0.6233220566\H,-4.9649285019,-0.684275971,1.4475302946\H,-4.1721103641,-0.9623607058,2.893270593\Version=ES64L-G09RevD.01\State=1-A\HF=-561.3763792\RMSD=3.279e-09\RMSF=6.958e-06\Dipole=-0.2900678,0.2864111,0.2939038\Quadrupole=5.1310284,-6.5456635,1.4146351,-1.7263852,-1.7350239,-1.024655\PG=C01 [X(C13H19N1)]\@

#### Model 7

1\1\GINC-R38\FOpt\RM062X\6-31+G(d,p)\C21H22\ROOT\04-Dec-2017\0\#M062X\6-31+G(d,p) SCF=Tight INT(grid=ultrafine) OPT IOP(2/17=4) maxdisk=12GB\19.freq\0,1\C,-0.3254591988,-0.2313531018,1.4306303305\C,-0.3132040872,0.195175175,0.1334196305\C,1.1021868994,0.4803286205,-0.3680409501\C,1.9078266913,0.4362096282,0.9524298059\C,1.0795609643,-0.3073085925,2.0275133258\C,1.2602661863,0.4295431807,3.3669732664\C,1.5412153449,-1.7686919955,2.1729314388\C,1.301556208,1.8672099328,-1.0056681944\C,1.5744209907,-0.6122526992,-1.3443469399\H,0.7633060077,1.4046220536,3.3439947997\H,2.329946589,0.5973629001,3.537143381\H,0.8831958696,-0.125840384,4.2277607839\H,1.5082177967,-2.2913256541,1.2130230886\H,0.9124507806,-2.3253608279,2.8736936038\H,2.5717899548,-1.7982433003,2.544500221\H,0.7988682498,2.6412186508,-0.4170328284\H,0.9422677648,1.9330615171,-2.0343405717\H,2.373027122,2.0972491173,-1.0248644537\H,1.5279901737,-1.6023237544,-0.8825446524\H,2.6113287256,-0.421343356,-1.6433393954\H,0.9608168141,-0.6409756356,-2.2493099925\C,-1.5343186323,0.2923074382,-0.6349290389\C,-2.7725659551,0.0021798127,-0.0021089833\C,-2.7856562975,-0.4533369178,1.3832205246\C,-1.5600270583,-0.6022850118,2.0857470242\C,-3.9619750525,0.1373597334,-0.753446075\C,-3.9428337542,0.5191705031,-2.0782883639\C,-2.7172513656,0.7746394317,-2.7132238792\C,-1.5425715716,0.6625978576,-2.0009100113\C,-3.988446378,-0.7837256588,2.047760982\C,-3.9940461503,-1.262721121,3.3407744471\C,-2.7809229305,-1.4407702739,4.0242130758\C,-1.5936555072,-1.1148281461,3.4045563747\H,-4.9208121163,-0.0669767488,-0.2930558426\H,-4.8738544062,0.6118068378,-2.6283236949\H,-2.6920642213,1.0586863377,-3.7604814545\H,-0.6060599586,0.8550208733,-2.5056111431\H,-4.9381305844,-0.669607644,1.5396681383\H,-4.9348170214,-1.5093478312,3.8224847282\H,-2.7751937772,-1.8337708592,5.0359357453\H,-0.6669844459,-1.2647244413,3.9408515585\H,2.0705401635,1.4660406751,1.2925663968\H,2.8968831736,-0.0170863215,0.8127307938\Version=ES64L-G09RevD.01\State=1-A\HF=-813.2081549\RMSD=4.296e-09\RMSF=2.173e-06\Dipole=0.2063656,-0.0112917,-0.0017686\Quadrupole=4.5111609,-7.1239321,2.6127712,1.0139354,0.3402312,-3.5778937\PG=C01 [X(C21H22)]\@

#### Model 8

1\1\GINC-R117\FOpt\RM062X\6-31+G(d,p)\C12H23N1O1\ROOT\14-Dec-2017\0\#M062X\6-31+G(d,p) SCF=Tight INT(grid=ultrafine) OPT IOP(2/17=4) maxdisk=5GB\Nac.1.freq\0,1\C,-3.2562676335,1.195698900

1,0.2826023658\C,-2.5973503639,2.5563494881,0.0358753178\C,-2.535265726,0.0963576225,-0.4941116484\C,-1.0392816346,-0.0046348129,-0.1447551061\C,-1.1087491741,2.581385578,0.4215948086\C,-0.3942442858,1.3936386266,-0.2584747853\N,-4.664567713,1.2185279394,-0.0917261921\H,-3.2411189288,0.9751964494,1.3550770589\H,-3.1458478142,3.326260817,0.5919807031\H,-2.6961908777,2.7884433859,-1.0359097695\H,-2.6295246269,0.3147863289,-1.5704792831\H,-3.0243232316,-0.8704434546,-0.3154910601\C,-0.3558307002,-0.9259296698,-1.1644830745\C,-0.8526978154,-0.6390766835,1.2430363001\C,-0.9495220445,2.5884081045,1.9512204494\C,-0.4782786019,3.8757059399,-0.1102855797\H,-0.3392672477,1.6303587219,-1.3318924249\H,0.6452042808,1.3409748485,0.0963654504\H,-0.4479832129,-0.5287306742,-2.1811330812\H,-0.8037952286,-1.9258633169,-1.1471510137\H,0.7110702569,-1.0310498098,-0.9373868617\H,-1.43620146,-0.1506629386,2.0245080069\H,0.2007709325,-0.6047553886,1.5420276357\H,-1.1595910918,-1.6906483162,1.2154695877\H,-1.5304908291,1.8124875098,2.451578591\H,-1.2893494636,3.5487044395,2.3533929473\H,0.10191166,2.4572629169,2.2311025048\H,-0.5528520525,3.9332685597,-1.2016750572\H,0.5823387803,3.9312607369,0.1610663159\H,-0.9808550986,4.7527269571,0.311920356\H,-4.9218117419,0.9437069376,-1.0285597751\C,-5.6116460286,1.7482558625,0.7306665361\O,-5.3411952662,2.1767447509,1.8438362412\C,-7.0278289354,1.7705361311,0.1924438238\H,-7.1297313988,1.2943634913,-0.785173074\H,-7.3547598905,2.8103898877,0.1229281372\H,-7.6765157921,1.2655041338,0.9106146488\Version=ES64L-G09RevD.01\State=1-A\HF=-600.9027007\RMSD=9.430e-09\RMSF=3.635e-06\Dipole=0.1421644,-0.5136158,-1.2874715\Quadrupole=3.1819733,-0.3587343,-2.823239,2.0640525,7.4546855,-1.4980434\PG=C01 [X(C12H23N1O1)]\@

### Model 9.1

1\1\GINC-R277\FOpt\RM062X\6-31+G(d,p)\C11H22O1\ROOT\14-Dec-2017\0\#M062X\6-31+G(d,p) SCF=Tight INT(grid=ultrafine) OPT IOP(2/17=4) maxdisk=5GB\OMe.1.freq\0,1\C,-3.306121718,1.0717995824,0.3631402973\C,-2.7180999063,2.4684646475,0.1577868038\C,-2.5609225649,0.0488378136,-0.4934635679\C,-1.0569655789,-0.0150633664,-0.1633096662\C,-1.2216192544,2.5402877097,0.5195534254\C,-0.4691121137,1.4121326966,-0.2196692356\O,-4.7164277956,1.0407877321,0.1740289679\H,-3.2015089557,0.7959180534,1.4180890466\H,-3.2867153394,3.1940316705,0.753456867\H,-2.8286805318,2.7545779987,-0.8978322359\H,-2.6651981038,0.3253195078,-1.5526435356\H,-3.017893426,-0.9418777416,-0.3680976213\C,-0.3505175145,-0.8575089119,-1.2346417656\C,-0.8206828987,-0.7099732315,1.1877992977\C,-1.0251001932,2.4937606476,2.0438879883\C,-0.6567178976,3.8814559301,0.0312872152\H,-0.4375231015,1.697721131,-1.2819605801\H,0.5760538785,1.3882696669,0.1213454382\C,-5.1846060297,1.222236846,-1.1430045351\H,-0.4751975617,-0.4171752645,-2.2297453644\H,-0.7575939835,-1.8744471386,-1.2593653718\H,0.7234445497,-0.9289768648,-1.0273580323\H,-1.4023612596,-0.2828321633,2.0056427216\H,0.2375075716,-0.6558991248,1.4672680986\H,-1.0942259967,-1.7683072127,1.1129623131\H,-1.5266495945,1.6515290686,2.5223338921\H,-1.4234688359,3.4084630645,2.4967558563\H,0.0404244547,2.4327177882,2.292469533\H,-0.7599721111,3.9821816512,-1.0544728313\H,0.4070455002,3.9696121971,0.2806919413\H,-1.1840512967,4.7186221558,0.5019394875\H,-6.2721734191,1.2819381215,-1.0755223837\H,-4.9218003107,0.3790735601,-1.7944144794\H,-4.8133886614,2.1508149405,-1.5954579847\Version=ES64L-G09RevD.01\State=1-A\HF=-507.4320837\RMSD=2.303e-09\RMSF=1.348e-06\Dipole=0.4337232,0.0763653,-0.3825332\Quadrupole=-1.862599,0.6327836,1.2298153,-0.7101832,3.169458,0.1187208\PG=C01 [X(C11H22O1)]\@

### Model 9.2

1\1\GINC-R449\FOpt\RM062X\6-31+G(d,p)\C11H22O1\ROOT\14-Dec-2017\0\#M062X\6-31+G(d,p) SCF=Tight INT(grid=ultrafine) OPT IOP(2/17=4) maxdisk=5GB\OMe.2.freq\0,1\C,-3.3016082991,1.0217413052,0.502192333\C,-2.7364898559,2.4142144671,0.2543332613\C,-2.5683742046,-0.0141776215,-0.3513276431\C,-1.0465158412,-0.0344755921,-0.1137436918\C,-1.2270774253,2.5247624681,0.5273921404\C,-0.4928410596,1.4009999063,-0.234558851\O,-4.6833512497,1.0901213204,0.1855417315\H,-3.2081884993,0.7606724829,1.5707053819\H,-3.2879052499,3.1401570838,0.8645301537\H,-2.9372786973,2.6618058575,-0.7976954394\H,-2.7725366627,0.2322568225,-1.4035224008\H,-2.9680231635,-1.0206330805,-0.1718219409\C,-0.387116831,-0.887706889,-1.2061472819\C,-0.7184086039,-0.6925474237,1.2372625068\C,-0.944549156,2.5092733479,2.0389168229\C,-0.7237927408,3.8694307299,-0.0153543076\H,-0.531392155,1.6656294628,-1.3017830043\H,0.5710654264,1.4055341745,0.0440226407\C,-5.4306210091,-0.034441685,0.583393361\H,-0.5791202934,-0.4725341542,-2.2011811641\H,-0.7739026109,-1.9127289642,-1.1849760154\H,0.6983926339,-0.9338714615,-1.0607112214\H,-1.2730075174,-0.2652340615,2.0739967838\H,0.3500529509,-0.5998169895,1.4622828014\H,-0.961171337,-1.7605057638,1.1979190807\H,-1.4095444002,1.6696366422,2.557777736\H,-1.3301220105,3.4269626887,2.4968901118\H,0.1336124179,2.4657005174,2.2305090933\H,-0.8912036026,3.9469772568,-1.094859011\H,0.3498628751,3.9870087429,0.1719641212\H,-1.2444255259,4.7026448246,0.4695267998\H,-6.483883168,0.2200218995,0.4536366402\H,-5.2489690159,-0.2764660024,1.6410868506\H,-5.2059861184,-0.9199523118,-0.0247883793\Version=ES64L-G09RevD.01\State=1-A\HF=-507.4353266\RMSD=7.845e-09\RMSF=4.466e-06\Dipole=0.258927,-0.3911374,0.2187021\Quadrupole=-0.5105208,0.6697922,-0.1592714,2.7867406,-1.2971623,0.0140903\PG=C01 [X(C11H22O1)]\@

## Model 10

I1\GINC-R52\FOpt\RM062X\6-31+G(d,p)\C27H26\ROOT\15-Dec-2017\0\#M062X\6-31+G(d,p) SCF=Tight INT(grid=ultrafine) OPT IOP(2/17=4) maxdisk=12GB\7m.retry.freq\0,1\C,0.2128375068,2.3279274898,1.2872955849\C,1.1633827599,1.1827012882,0.9194715227\C,-0.724137976,-0.0585789612,-0.1825334234\C,-1.3908236328,0.9111659127,-0.9189842024\C,-0.7059792013,2.2338789461,-1.2820554678\C,-0.3269321721,3.0274076895,0.004028054\C,0.9257044017,3.4331032658,2.0859785227\C,-0.9347131457,1.8355320316,2.1987049745\C,2.5380616673,1.2397419196,1.2816103687\C,-1.4269408052,-1.2150743478,0.3000529081\C,-2.7462433892,0.6755700702,-1.2815569585\C,-1.6380442723,3.1650317533,-2.0768133436\C,0.5197915898,2.0004879482,-2.1947791483\H,-1.2112749355,3.5970653256,0.323043702\H,0.4158288768,3.7733547354,-0.3125565465\C,-2.7840022468,-1.4211421552,-0.0742591733\C,-3.4154492841,-0.4557944203,-0.8943327858\C,0.718076398,0.0960348703,0.1791546264\C,1.6507280543,-0.8826026342,-0.3074292726\C,3.0207224373,-0.7964089484,0.0665620833\C,3.4325909381,0.2782281478,0.8903724944\C,-0.8320991519,-2.1573253739,1.1898515049\C,-1.5338744016,-3.2477213414,1.639735691\C,-2.871629302,-3.468185822,1.2280120102\C,-3.4814017668,-2.5687492816,0.392980953\C,3.9462541482,-1.767519054,-0.4046061062\C,3.5415703415,-2.7731469281,-1.2430849282\C,2.1873595331,-2.8410224307,-1.654436218\C,1.2697356952,-1.9266418139,-1.2008407965\H,1.7795012301,3.8500644241,1.5434289956\H,1.2703554261,3.0694799148,3.0597678681\H,0.2200631252,4.2499254982,2.2679155478\H,-1.6257201457,1.150292643,1.7099038424\H,-1.5121807076,2.6988535504,2.5479481512\H,-0.5190938304,1.3294427531,3.0764323553\H,2.8985806482,2.0608770174,1.8883435441\H,-3.2735436025,1.4033732865,-1.8853911773\H,-2.5608143096,3.3886997852,-1.5330778389\H,-1.897780928,2.7400869927,-3.0521288537\H,-1.1224816055,4.1140066051,-2.2553804689\H,1.3411791188,1.4766570024,-1.7080522257\H,0.8998331485,2.9682610605,-2.5408315298\H,0.2212790499,1.4204531116,-3.0743863952\H,-4.4477861232,-0.6130312531,-1.1958975755\H,4.4748984873,0.3432543583,1.191630068\H,0.1884757924,-2.0030555148,1.5224305256\H,-1.0597924827,-3.9474699289,2.3208311543\H,-3.4110083955,-4.3398656605,1.5848566939\H,-4.5130833843,-2.7104255601,0.0816189299\H,4.9845872187,-1.6874160316,-0.0934227264\H,4.2539904001,-3.5087304694,-1.6028999254\H,1.8727817327,-3.6231781689,-2.3382250199\H,0.2395874722,-1.9919902972,-1.5332585692\Version=ES64L-G09RevD.01\State=1-A\HF=-1044.1696475\RMSD=5.279e-09\RMSF=4.203e-06\Dipole=-0.0208125,0.1934992,0.0003672\Quadrupole=3.5254506,1.7867136,-5.3121642,0.1832577,3.2668268,0.3649654\PG=C01 [X(C27H26)]\@

## References:

1. Z. F. Jia, D. E. Lonsdale, J. Kulis and M. J. Monteiro, *ACS Macro Letters*, 2012, **1**, 780-783.
2. Z. F. Jia, C. A. Bell and M. J. Monteiro, *Macromolecules*, 2011, **44**, 1747-1751.
3. J. Frisch, G. W. Trucks, H. B. S. Schlegel, G. E., M. A. Robb, J. R. Cheeseman, G. Scalmani, V. Barone, B. Mennucci, G. A. Petersson, H. Nakatsuji, M. Caricato, X. Li, H. P. Hratchian, A. F. Izmaylov, J. Bloino, G. Zheng, J. L. Sonnenberg, M. Hada, M. Ehara, K. Toyota, R. Fukuda, J. Hasegawa, M. Ishida, T. Nakajima, Y. Honda, O. Kitao, H. Nakai, T. Vreven, J. A. Montgomery, J. Peralta, J. E., F. Ogliaro, M. Bearpark, J. J. Heyd, E. Brothers, K. N. Kudin, V. N. Staroverov, T. Keith, R. Kobayashi, J. Normand, K. Raghavachari, A. Rendell, J. C. Burant, S. S. Iyengar, J. Tomasi, M. Cossi, N. Rega, J. M. Millam, M. Klene, J. E. Knox, J. B. Cross, V. Bakken, C. Adamo, J. Jaramillo, R. Gomperts, R. E. Stratmann, O. Yazyev, A. J. Austin, R. Cammi, C. Pomelli, J. W. Ochterski, R. L. Martin, K. Morokuma, V. G. Zakrzewski, G. A. Voth, P. Salvador, J. J. Dannenberg, S. Dapprich, A. D. Daniels, O. Farkas, J. B. Foresman, J. V. Ortiz, J. Cioslowski and D. J. Fox, *Journal*, 2013.
4. H.-J. Werner, P. J. Knowles, G. Knizia, F. R. Manby, M. Schütz, P. G. Celani, W. , D. Kats, T. , R. Lindh, A. Mitrushenkov, G. S. Rauhut, K. R. , T. B. A. Adler, R. D. , A. Bernhardsson, A. C. Berning, D. L. , M. J. O. Deegan, A. J. Dobbyn, F. Eckert, E. Goll, C. Hampel, A. Hesselmann, G. Hetzer, T. Hrenar, G. Jansen, C. Köppl, Y. Liu, A. W. Lloyd, R. A. Mata, A. J. May, S. J. McNicholas, W. Meyer, M. E. Mura, A. Nicklass, D. P. O'Neill, P. Palmieri, D. Peng, K. Pflüger, R. Pitzer, M. Reiher, T. Shiozaki, H. Stoll, A. J. Stone, R. Tarroni, T. Thorsteinsson and M. Wang, *Journal*, 2015.
5. H.-J. Werner, P. J. Knowles, G. Knizia, F. R. Manby and M. Schütz, *Wiley Interdisciplinary Reviews: Computational Molecular Science*, 2012, **2**, 242-253.
6. G. Gryn'ova, J. M. Barakat, J. P. Blinco, S. E. Bottle and M. L. Coote, *Chemistry – A European Journal*, 2012, **18**, 7582-7593.

7. Y. Zhao and D. G. Truhlar, *Theor Chem Acc*, 2008, **120**, 215-241.
8. T. Clark, J. Chandrasekhar, G. W. Spitznagel and P. V. R. Schleyer, *Journal of Computational Chemistry*, 1983, **4**, 294-301.
9. M. J. Frisch, J. A. Pople and J. S. Binkley, *The Journal of Chemical Physics*, 1984, **80**, 3265-3269.
10. M. M. Francl, W. J. Pietro, W. J. Hehre, J. S. Binkley, M. S. Gordon, D. J. DeFrees and J. A. Pople, *The Journal of Chemical Physics*, 1982, **77**, 3654-3665.
11. J. D. Dill and J. A. Pople, *The Journal of Chemical Physics*, 1975, **62**, 2921-2923.
12. W. J. Hehre, R. Ditchfield and J. A. Pople, *J Chem Phys*, 1972, **56**, 2257-+.
13. L. A. Curtiss, K. Raghavachari, P. C. Redfern, A. G. Baboul and J. A. Pople, *Chem. Phys. Lett.*, 1999, **314**, 101-107.
14. L. A. Curtiss, P. C. Redfern and K. Raghavachari, *The Journal of Chemical Physics*, 2007, **126**, 084108.
15. L. A. Curtiss, P. C. Redfern and K. Raghavachari, *The Journal of Chemical Physics*, 2007, **127**, 124105.
16. C. Y. Lin, J. L. Hodgson, M. Namazian and M. L. Coote, *The Journal of Physical Chemistry A*, 2009, **113**, 3690-3697.
17. B. Chan, M. L. Coote and L. Radom, *Journal of Chemical Theory and Computation*, 2010, **6**, 2647-2653.
18. B. Chan, J. Deng and L. Radom, *Journal of Chemical Theory and Computation*, 2011, **7**, 112-120.
19. L. Zhang, Y. B. Vogel, B. B. Noble, V. R. Gonçales, N. Darwish, A. L. Brun, J. J. Gooding, G. G. Wallace, M. L. Coote and S. Ciampi, *Journal of the American Chemical Society*, 2016, **138**, 9611-9619.
20. E. I. Izgorodina, D. R. B. Brittain, J. L. Hodgson, E. H. Krenske, C. Y. Lin, M. Namazian and M. L. Coote, *J. Phys. Chem. A*, 2007, **111**, 10754-10768.
21. M. L. Coote, E. H. Krenske and E. I. Izgorodina, *Macromol. Rapid Commun.*, 2006, **27**, 473-497.
22. J. Tomasi, B. Mennucci and R. Cammi, *Chemical Reviews*, 2005, **105**, 2999-3094.
23. J. P. Foster and F. Weinhold, *Journal of the American Chemical Society*, 1980, **102**, 7211-7218.
24. J. P. Blinco, J. L. Hodgson, B. J. Morrow, J. R. Walker, G. D. Will, M. L. Coote and S. E. Bottle, *J Org Chem*, 2008, **73**, 6763-6771.
25. M. B. Lauber and S. S. Stahl, *ACS Catalysis*, 2013, **3**, 2612-2616.
26. S. D. Rychnovsky, R. Vaidyanathan, T. Beauchamp, R. Lin and P. J. Farmer, *The Journal of Organic Chemistry*, 1999, **64**, 6745-6749.
